# Supplementary material
Source: PubMed Central journal article supplement (PMC2877997)

sequence: Citrullus length: 379236

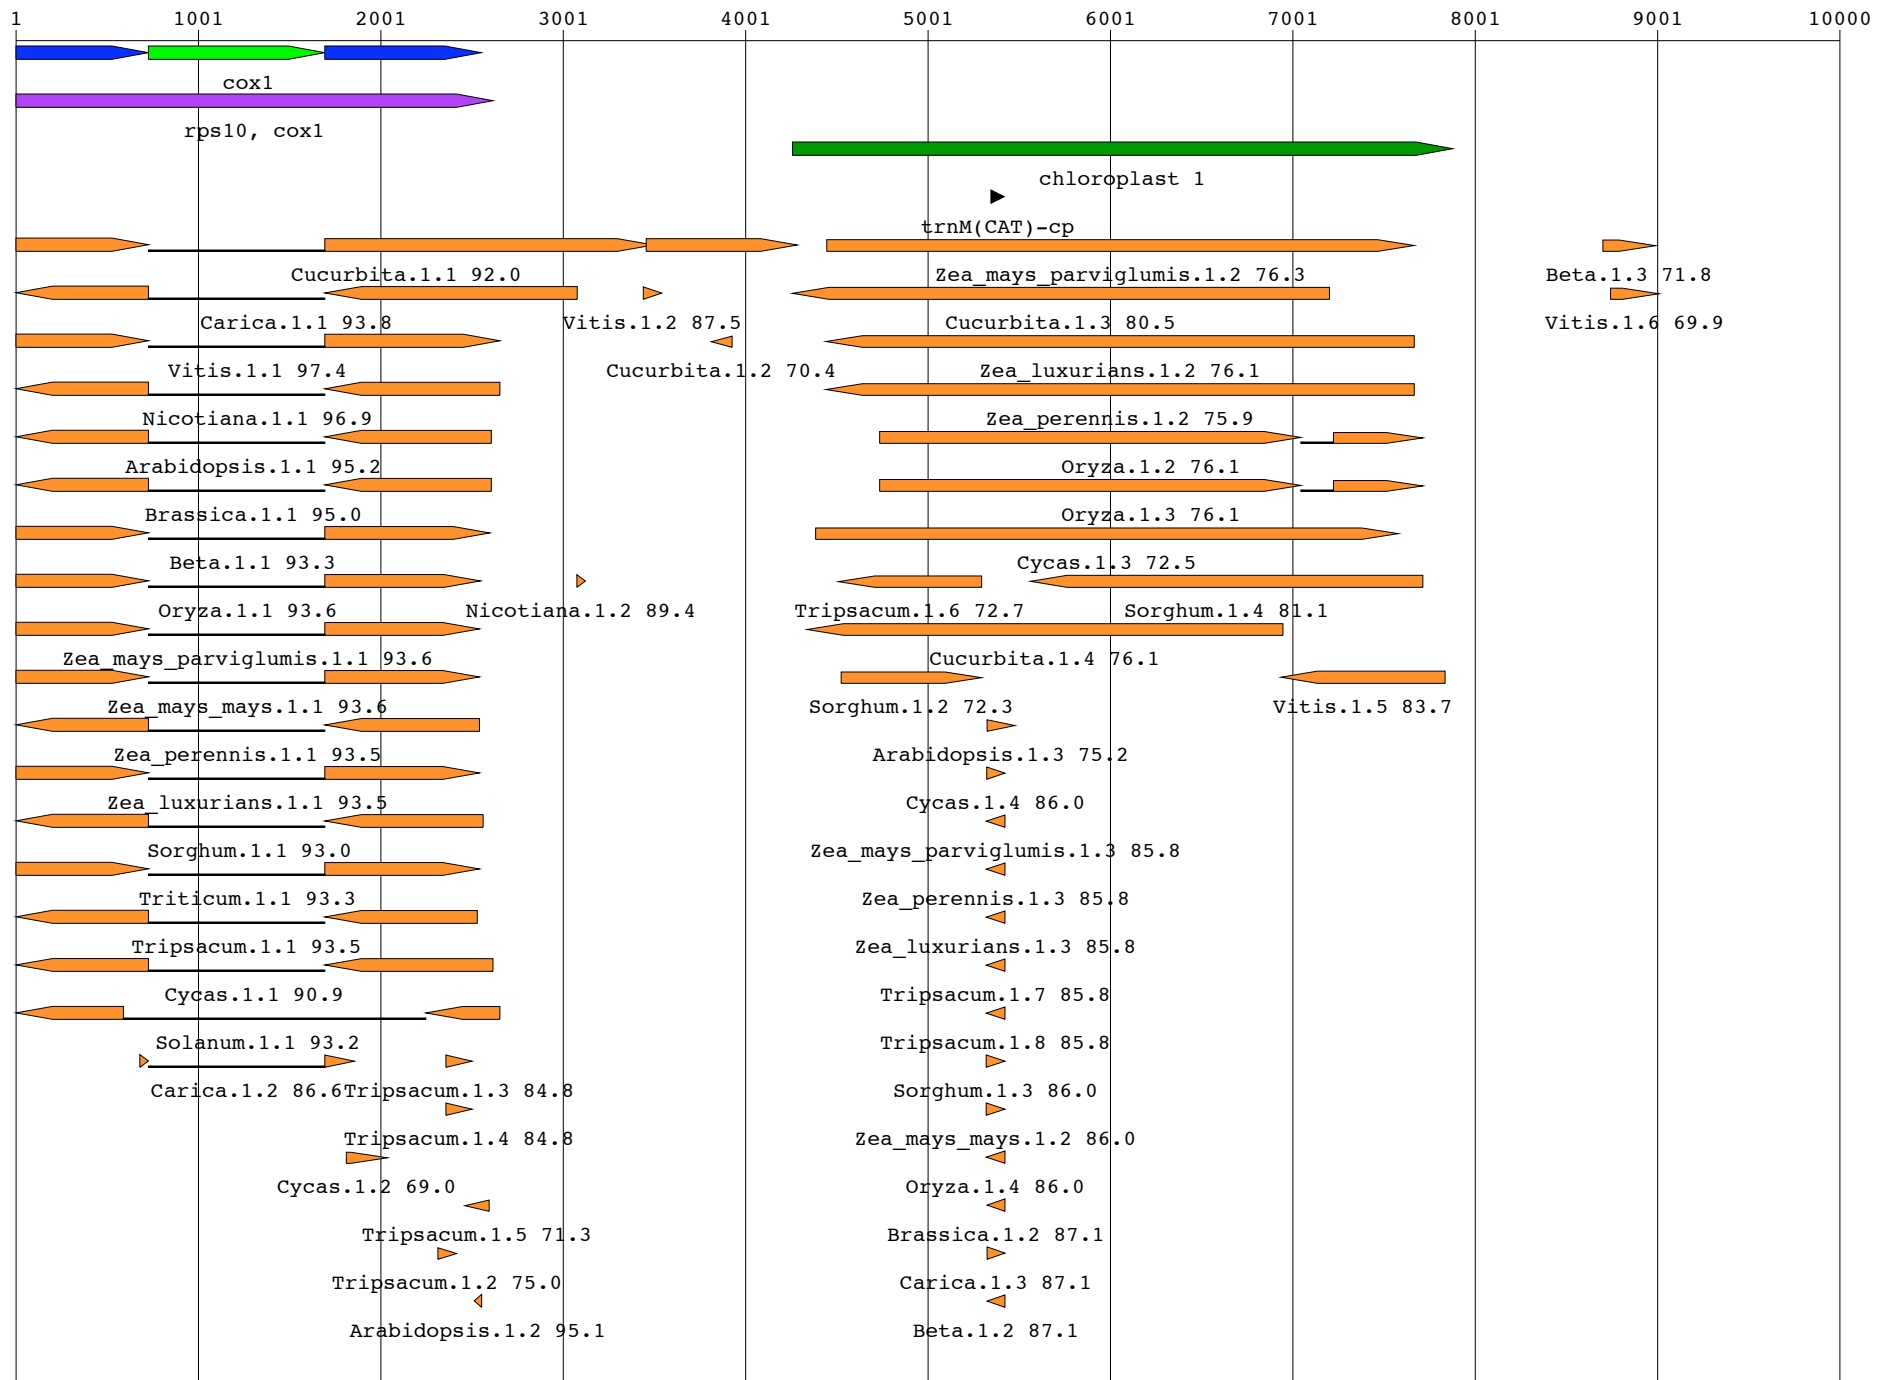

sequence: Citrullus length: 379236

10001 11001 12001 13001 14001 15001 16001 17001 18001 19001 20000

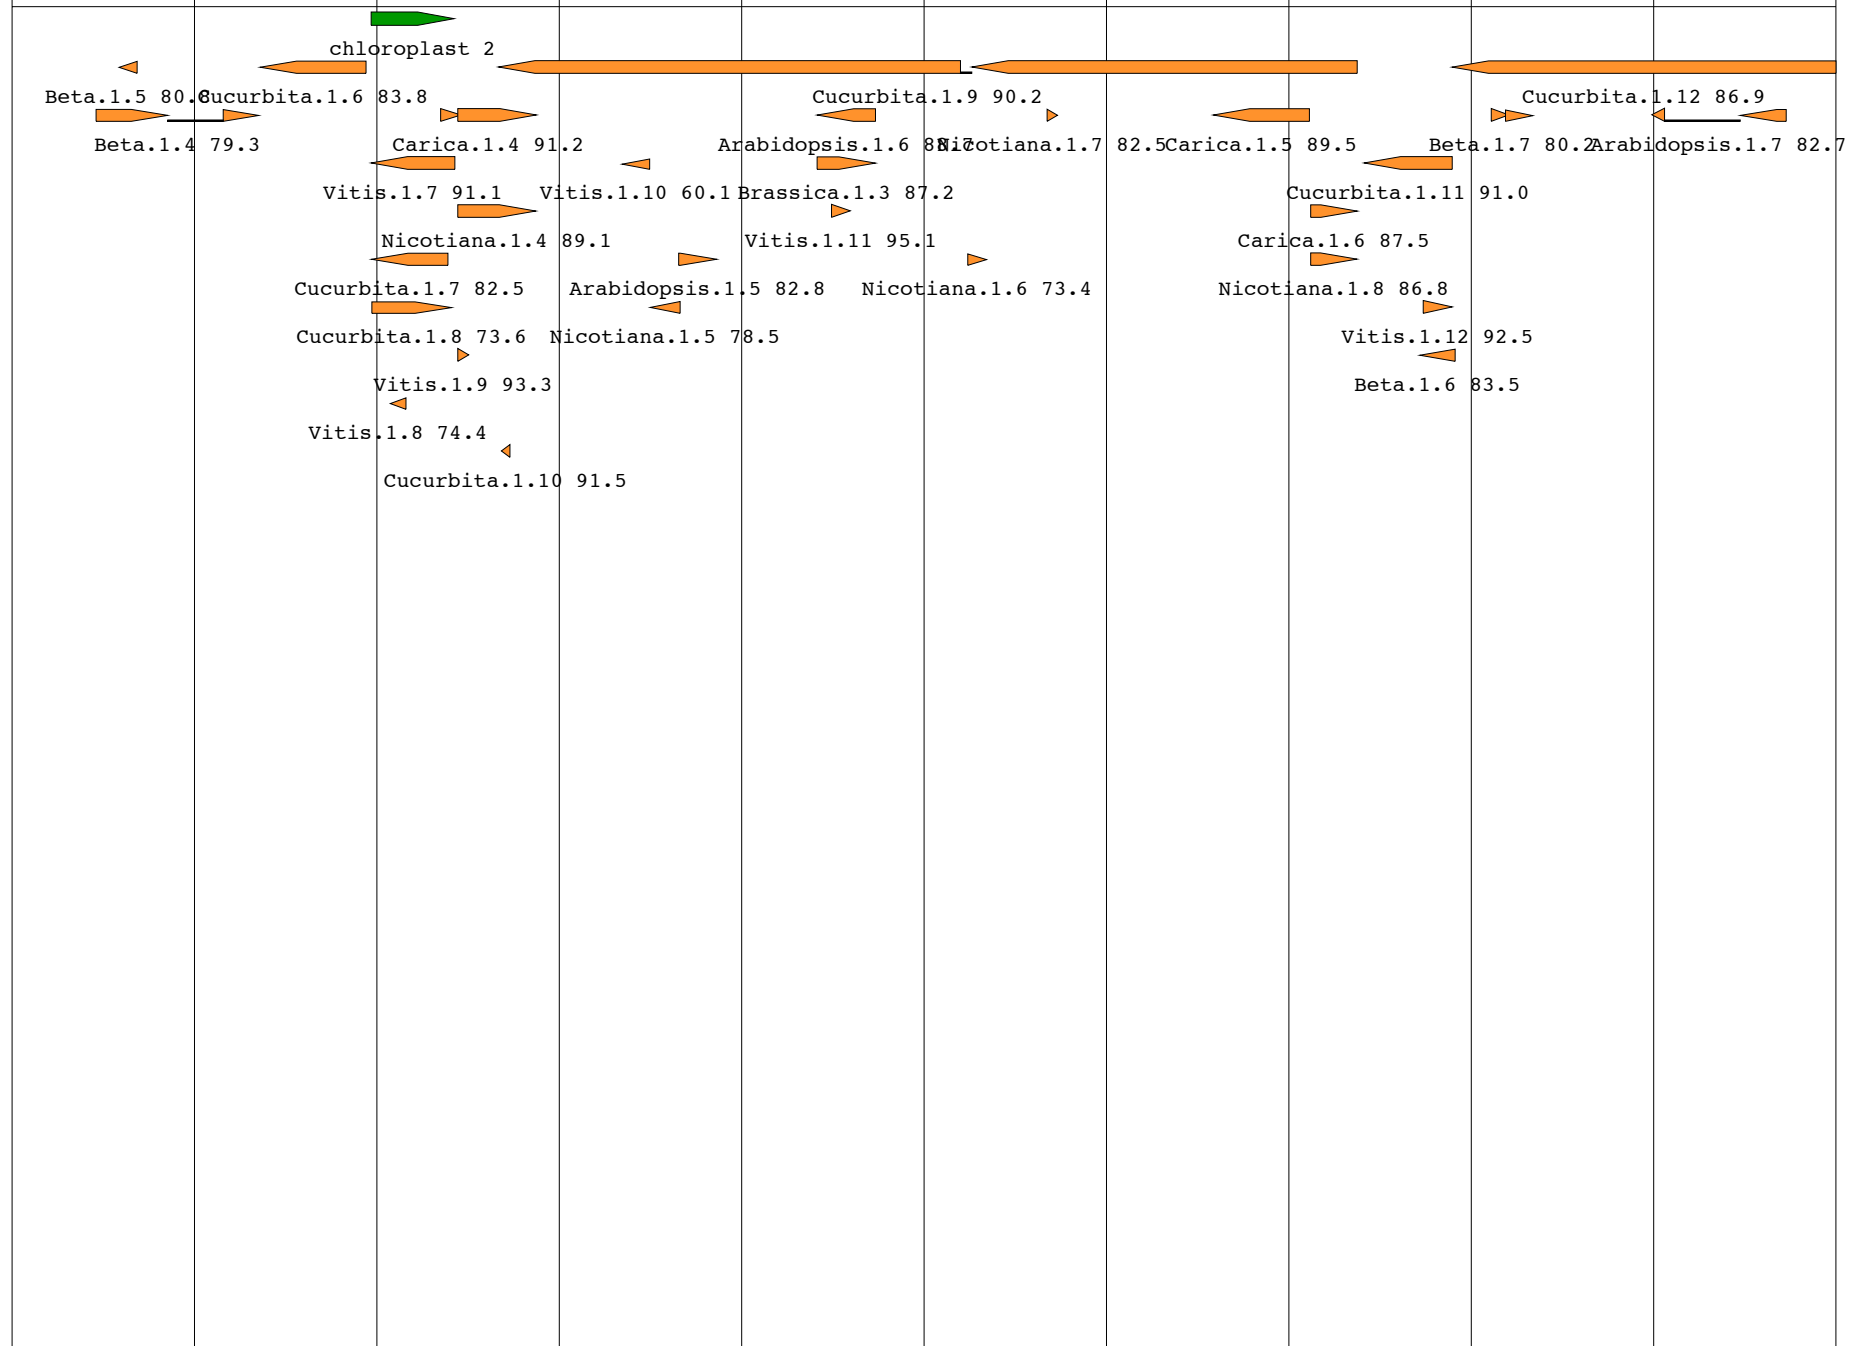

sequence: Citrullus length: 379236

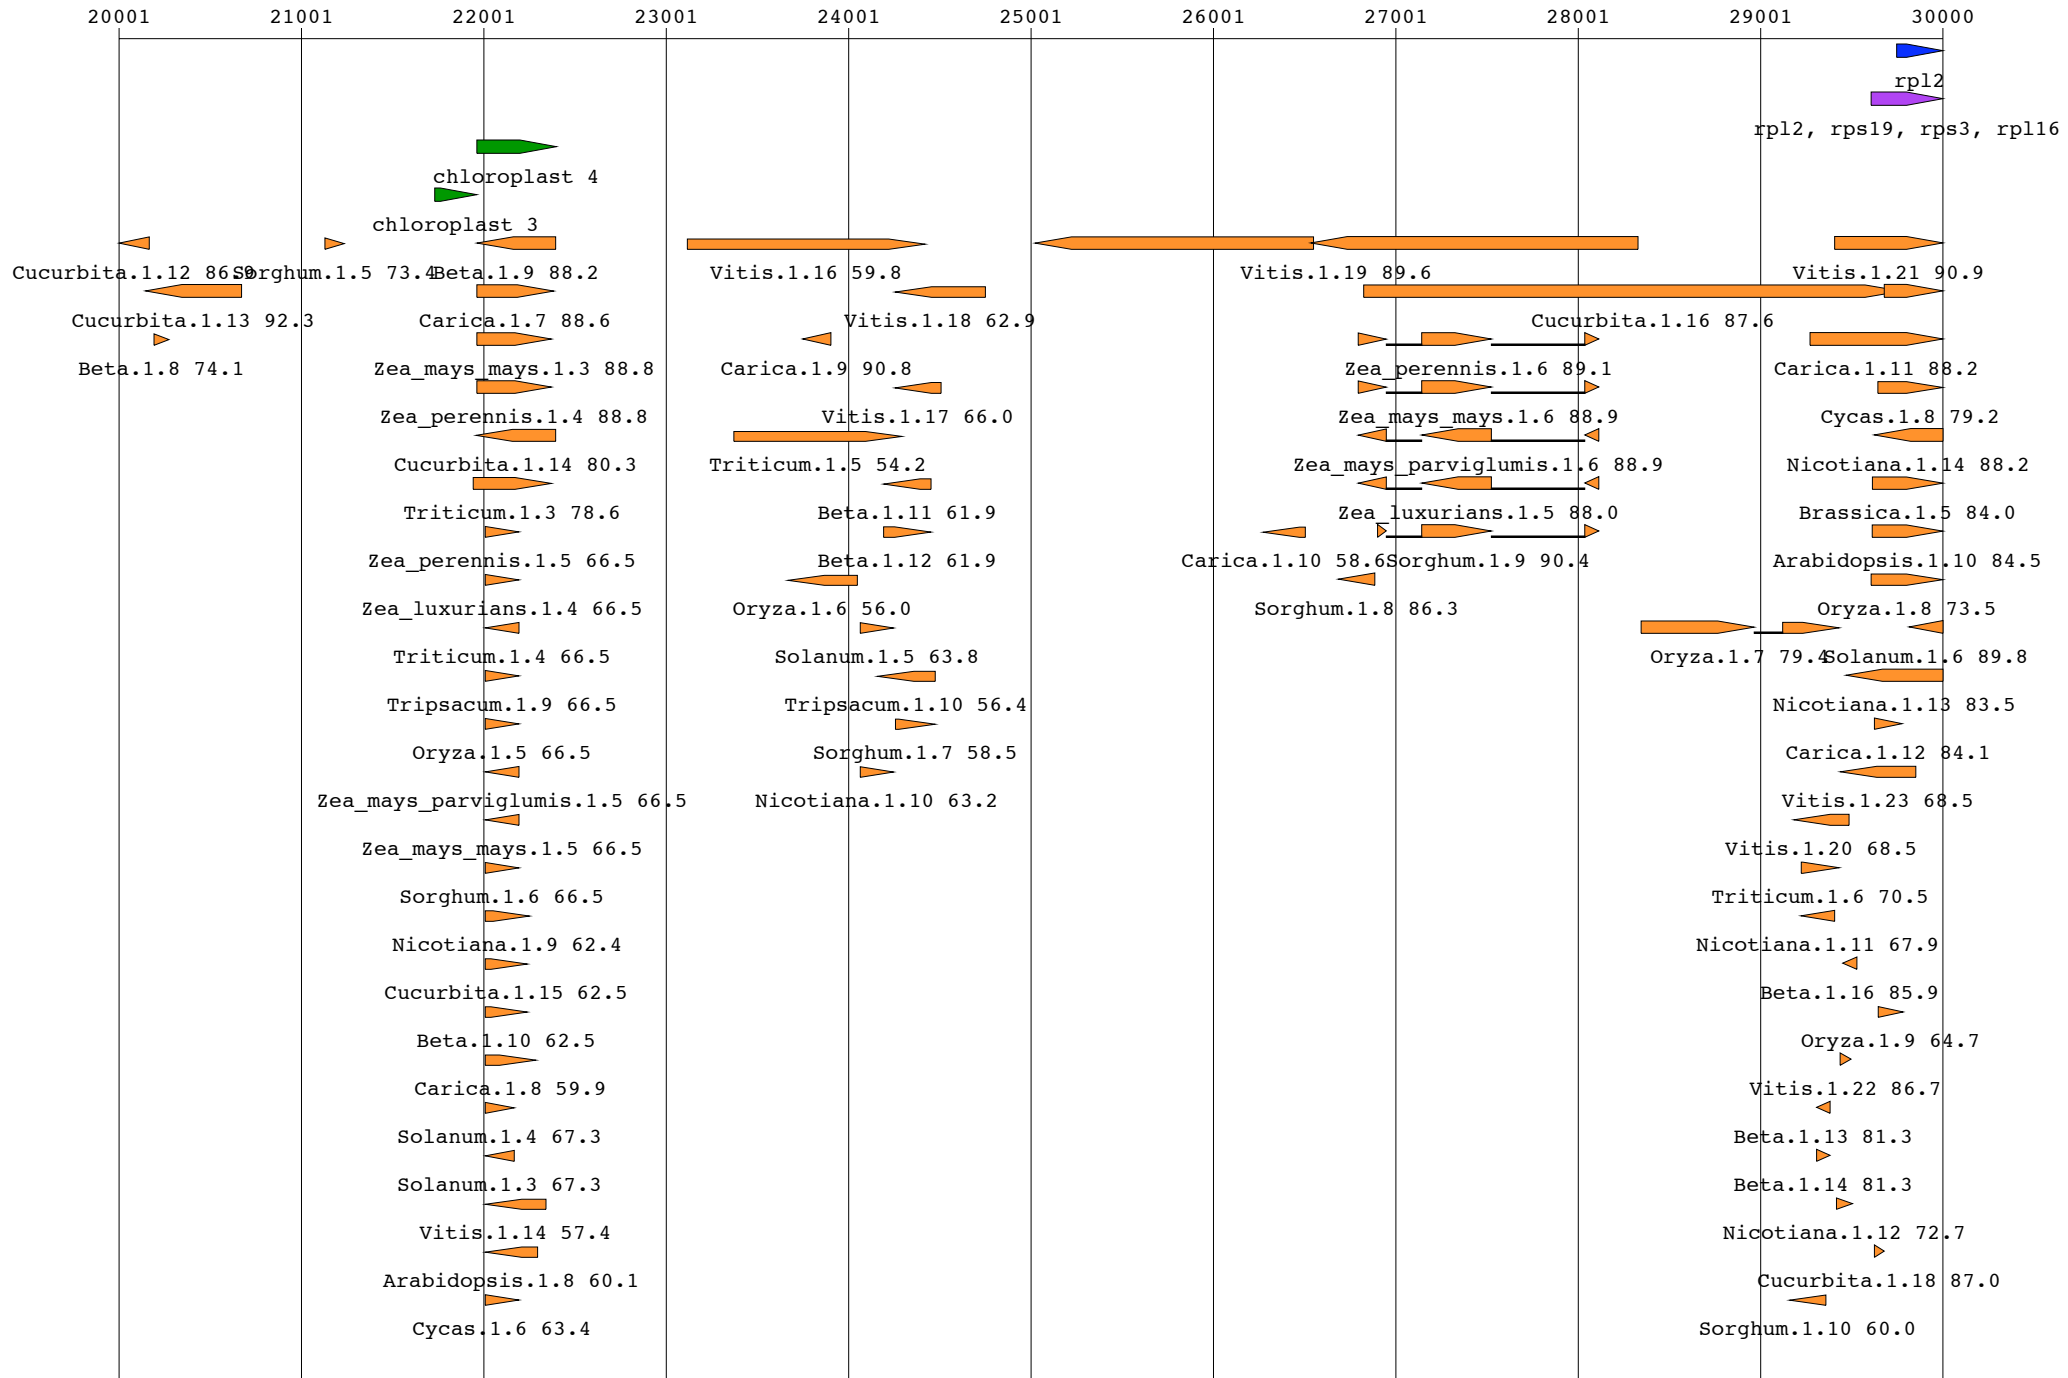

sequence: Citrullus length: 379236

30001 31001 32001 33001 34001 35001 36001 37001 38001 39001 40000

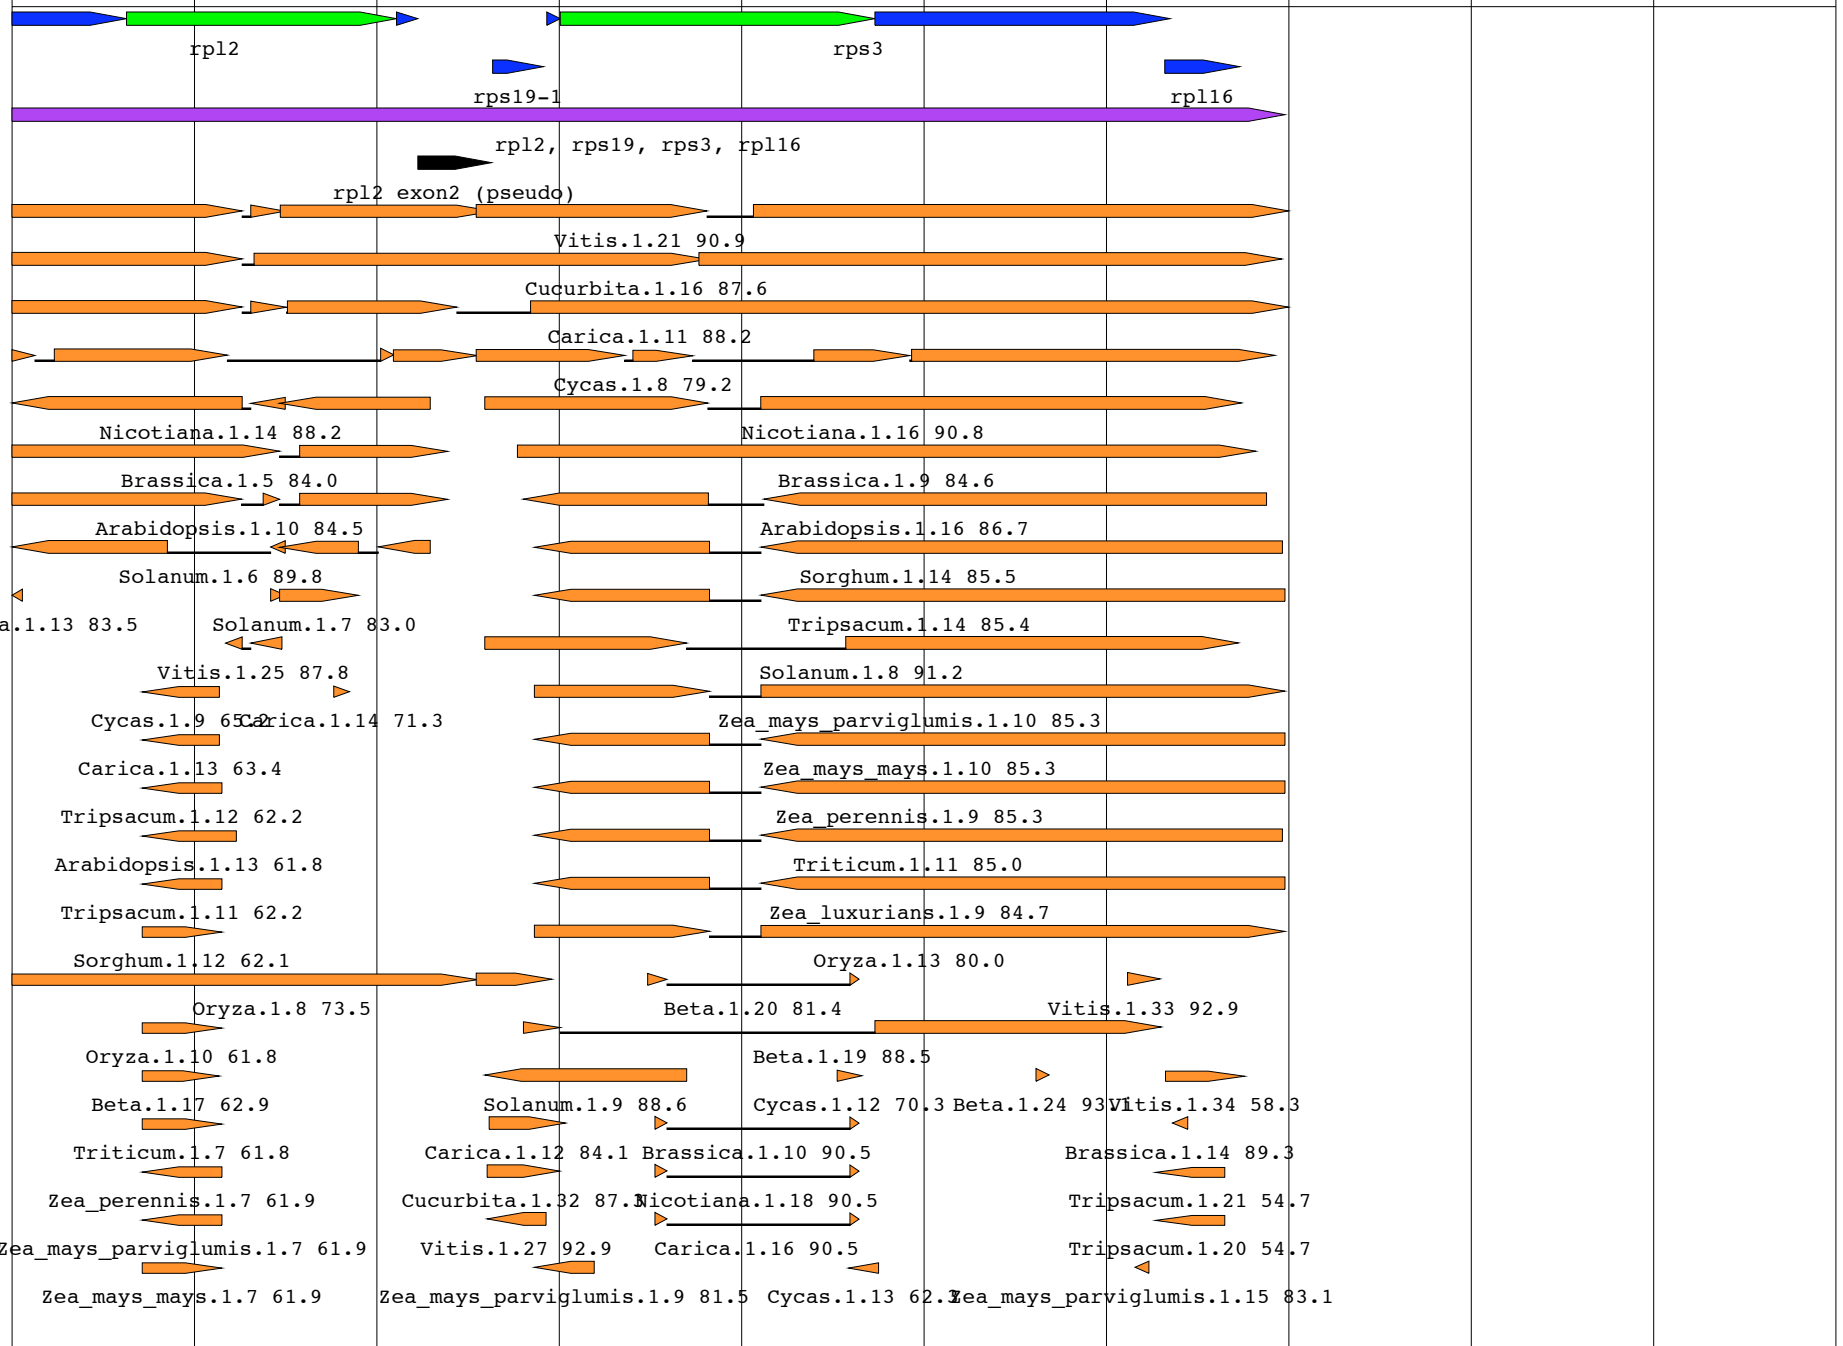

sequence: Citrullus length: 379236

40001 41001 42001 43001 44001 45001 46001 47001 48001 49001 50000

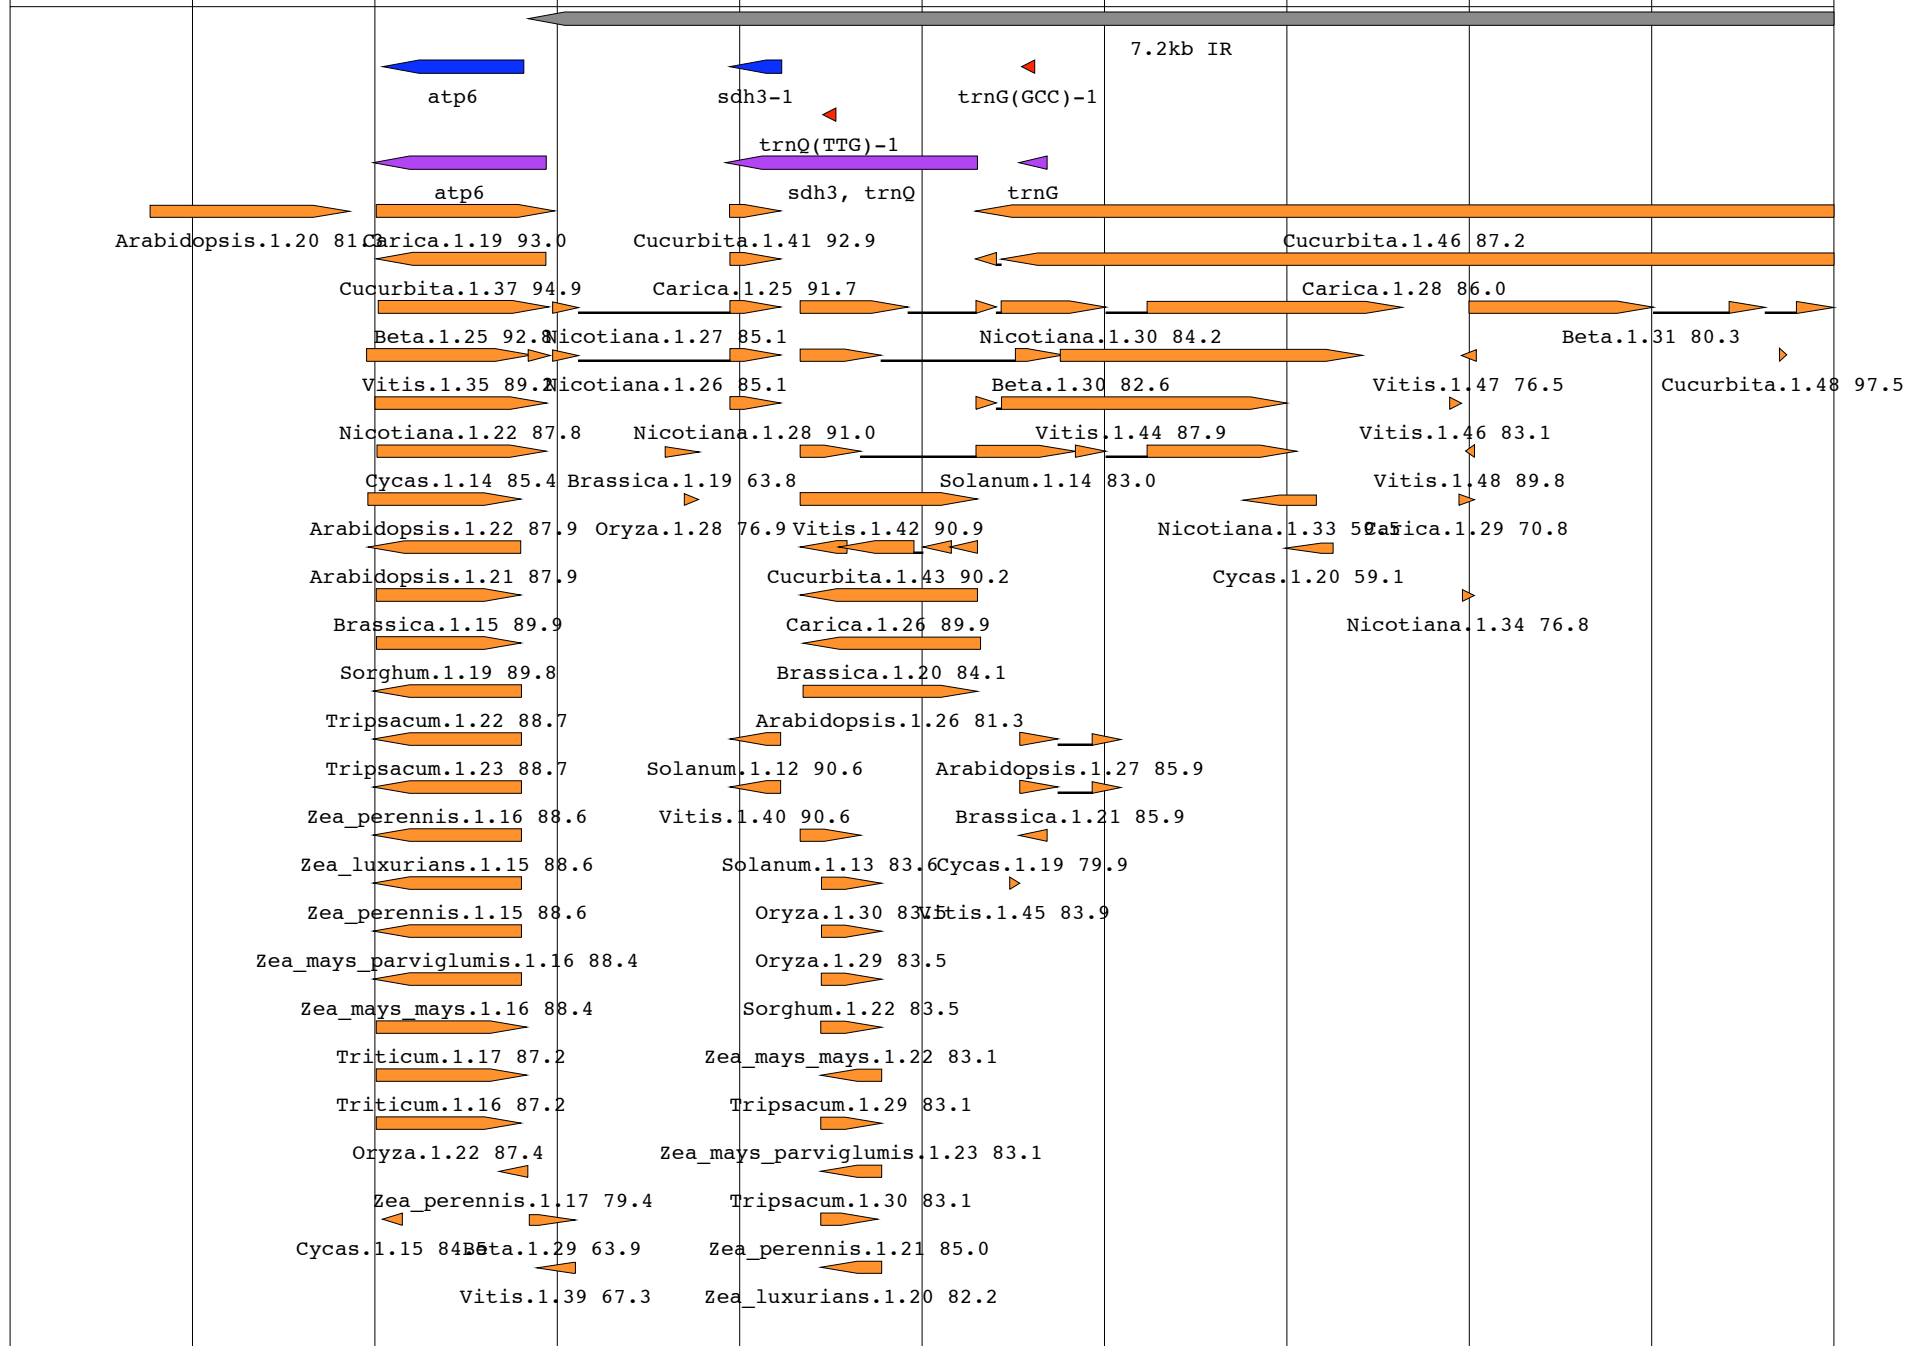

sequence: Citrullus length: 379236

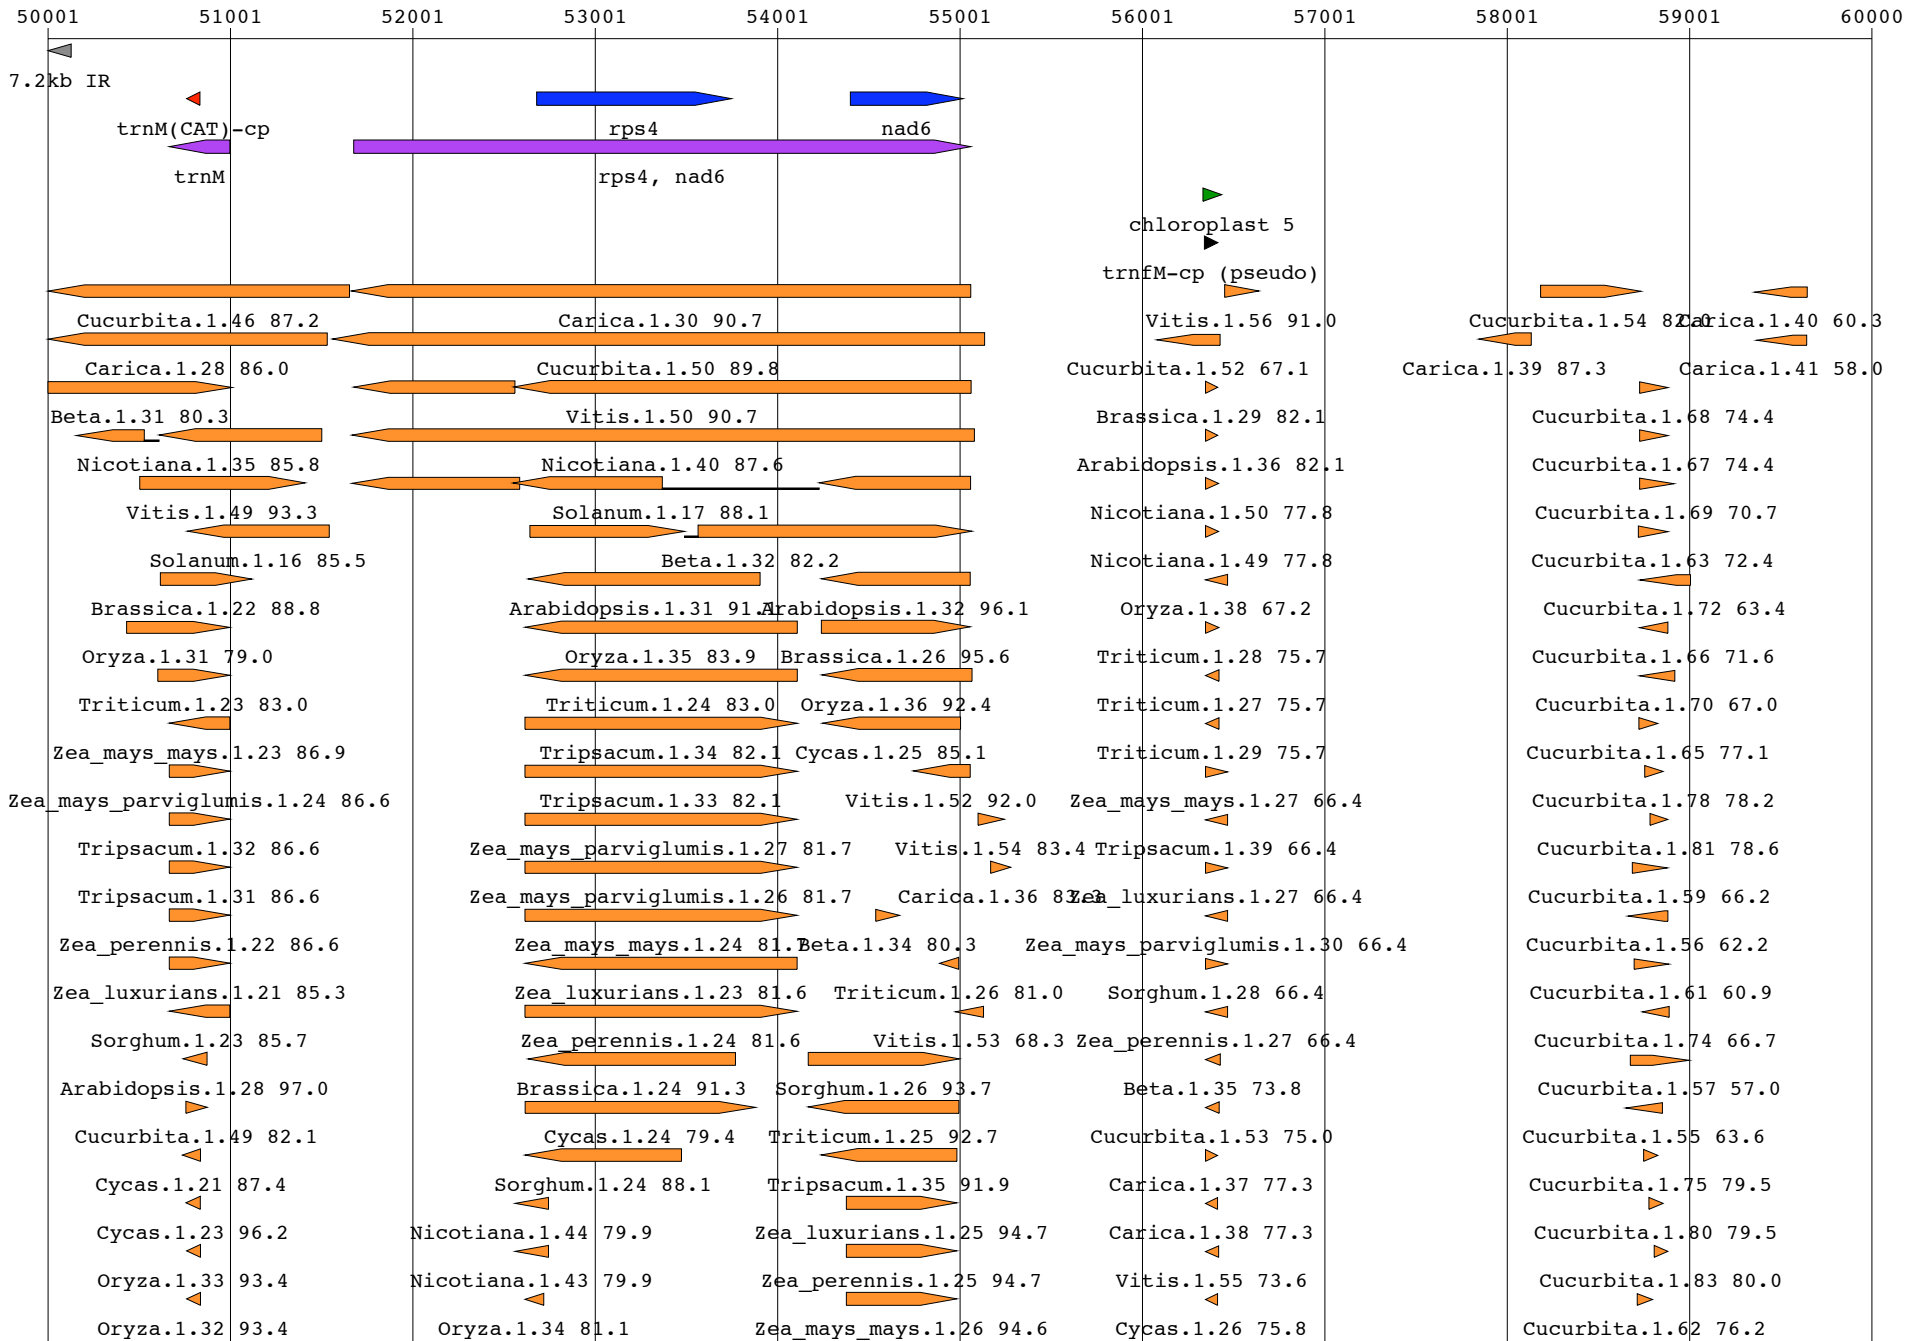

sequence: Citrullus length: 379236

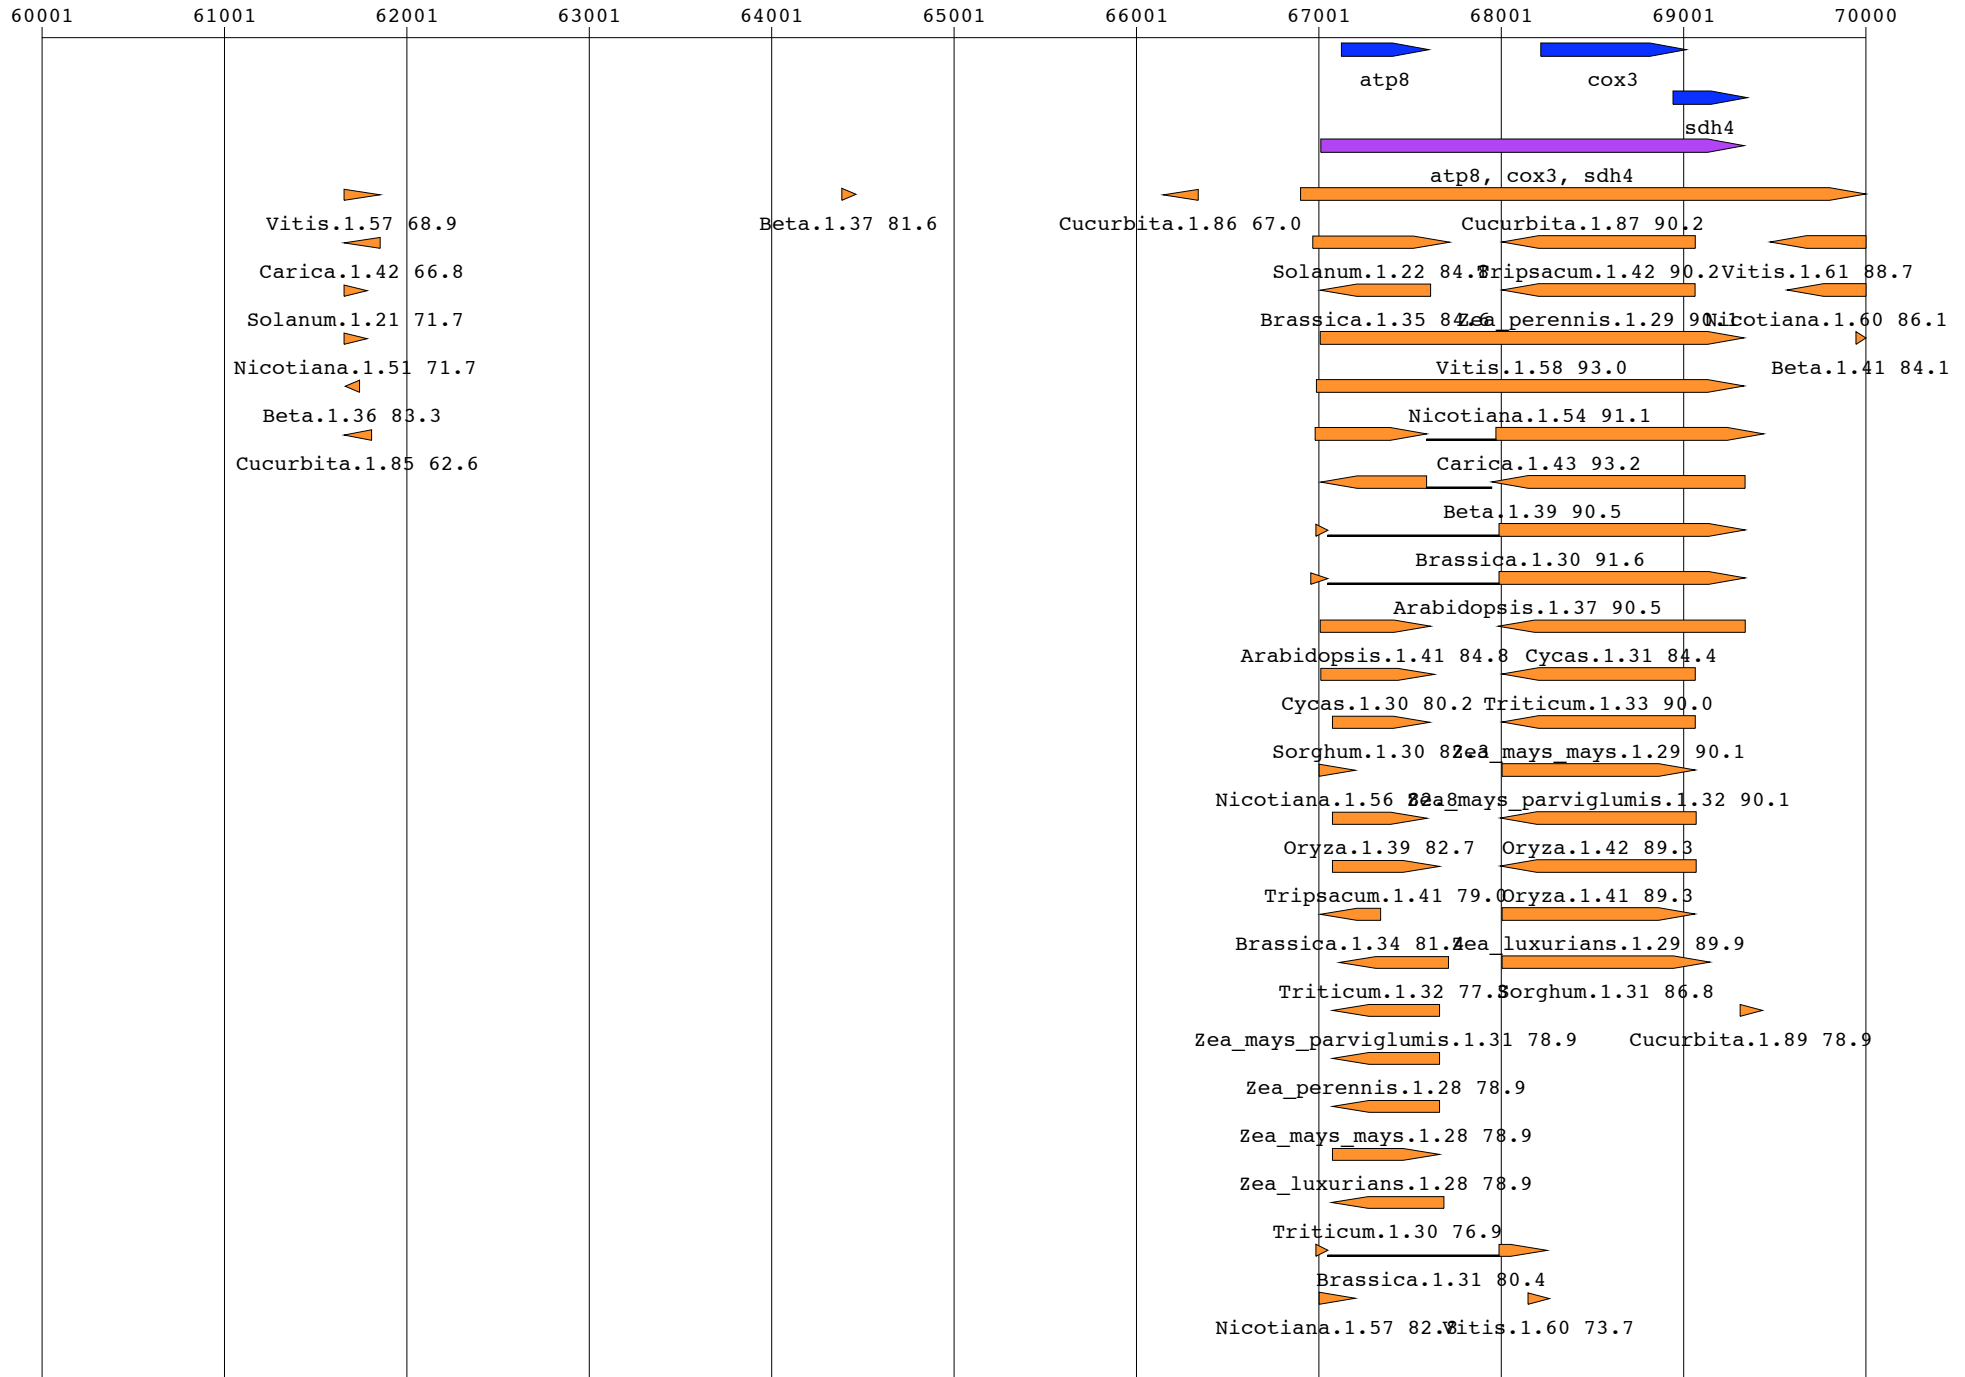

sequence: Citrullus length: 379236

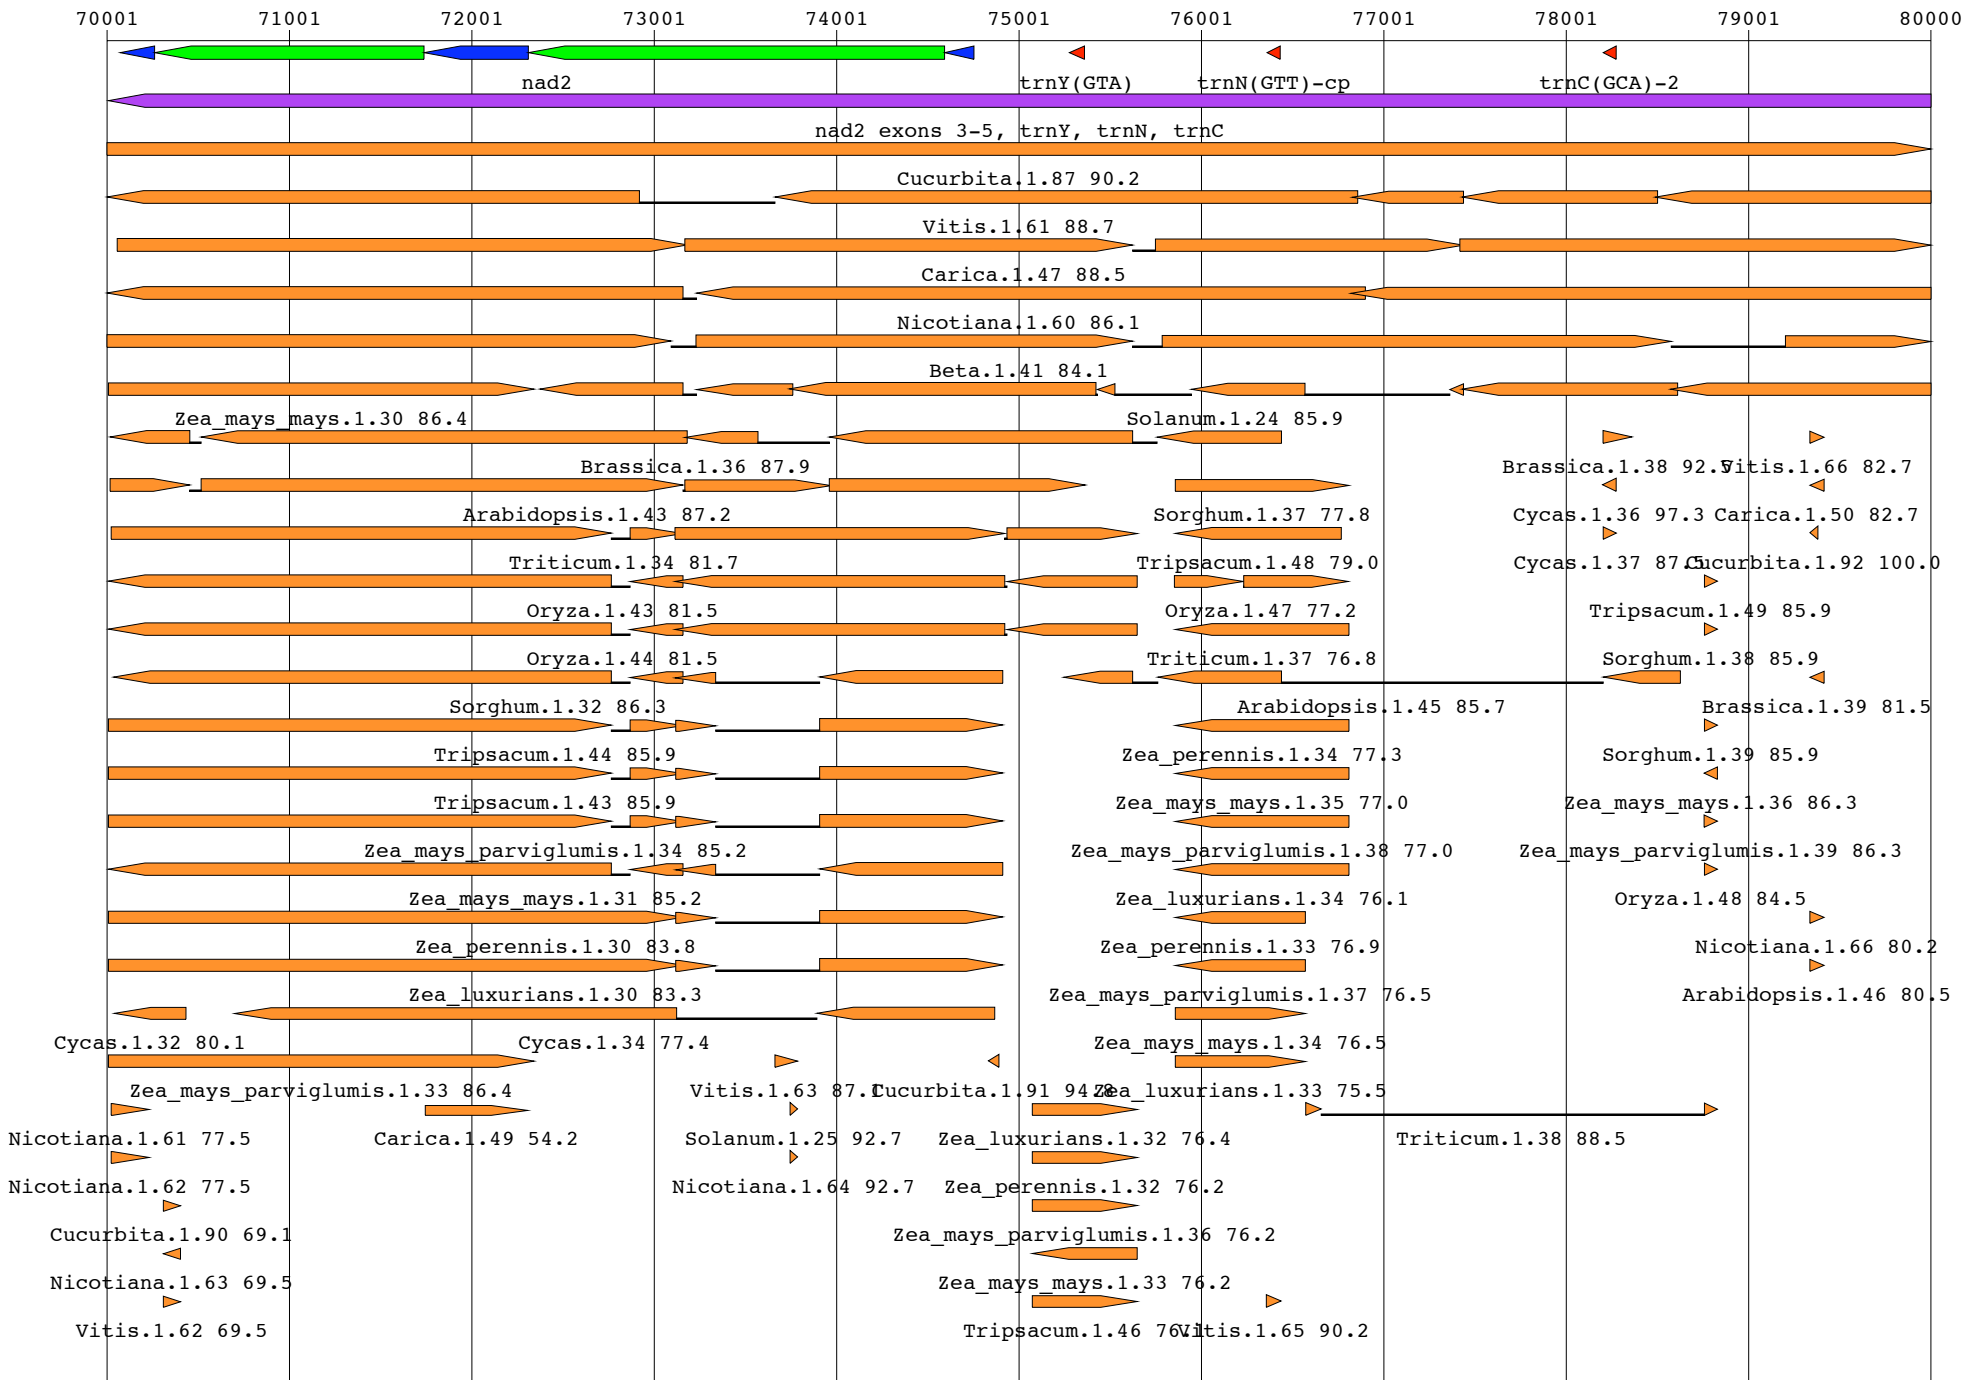



sequence: Citrullus length: 379236

80001 81001 82001 83001 84001 85001 86001 87001 88001 89001 90000

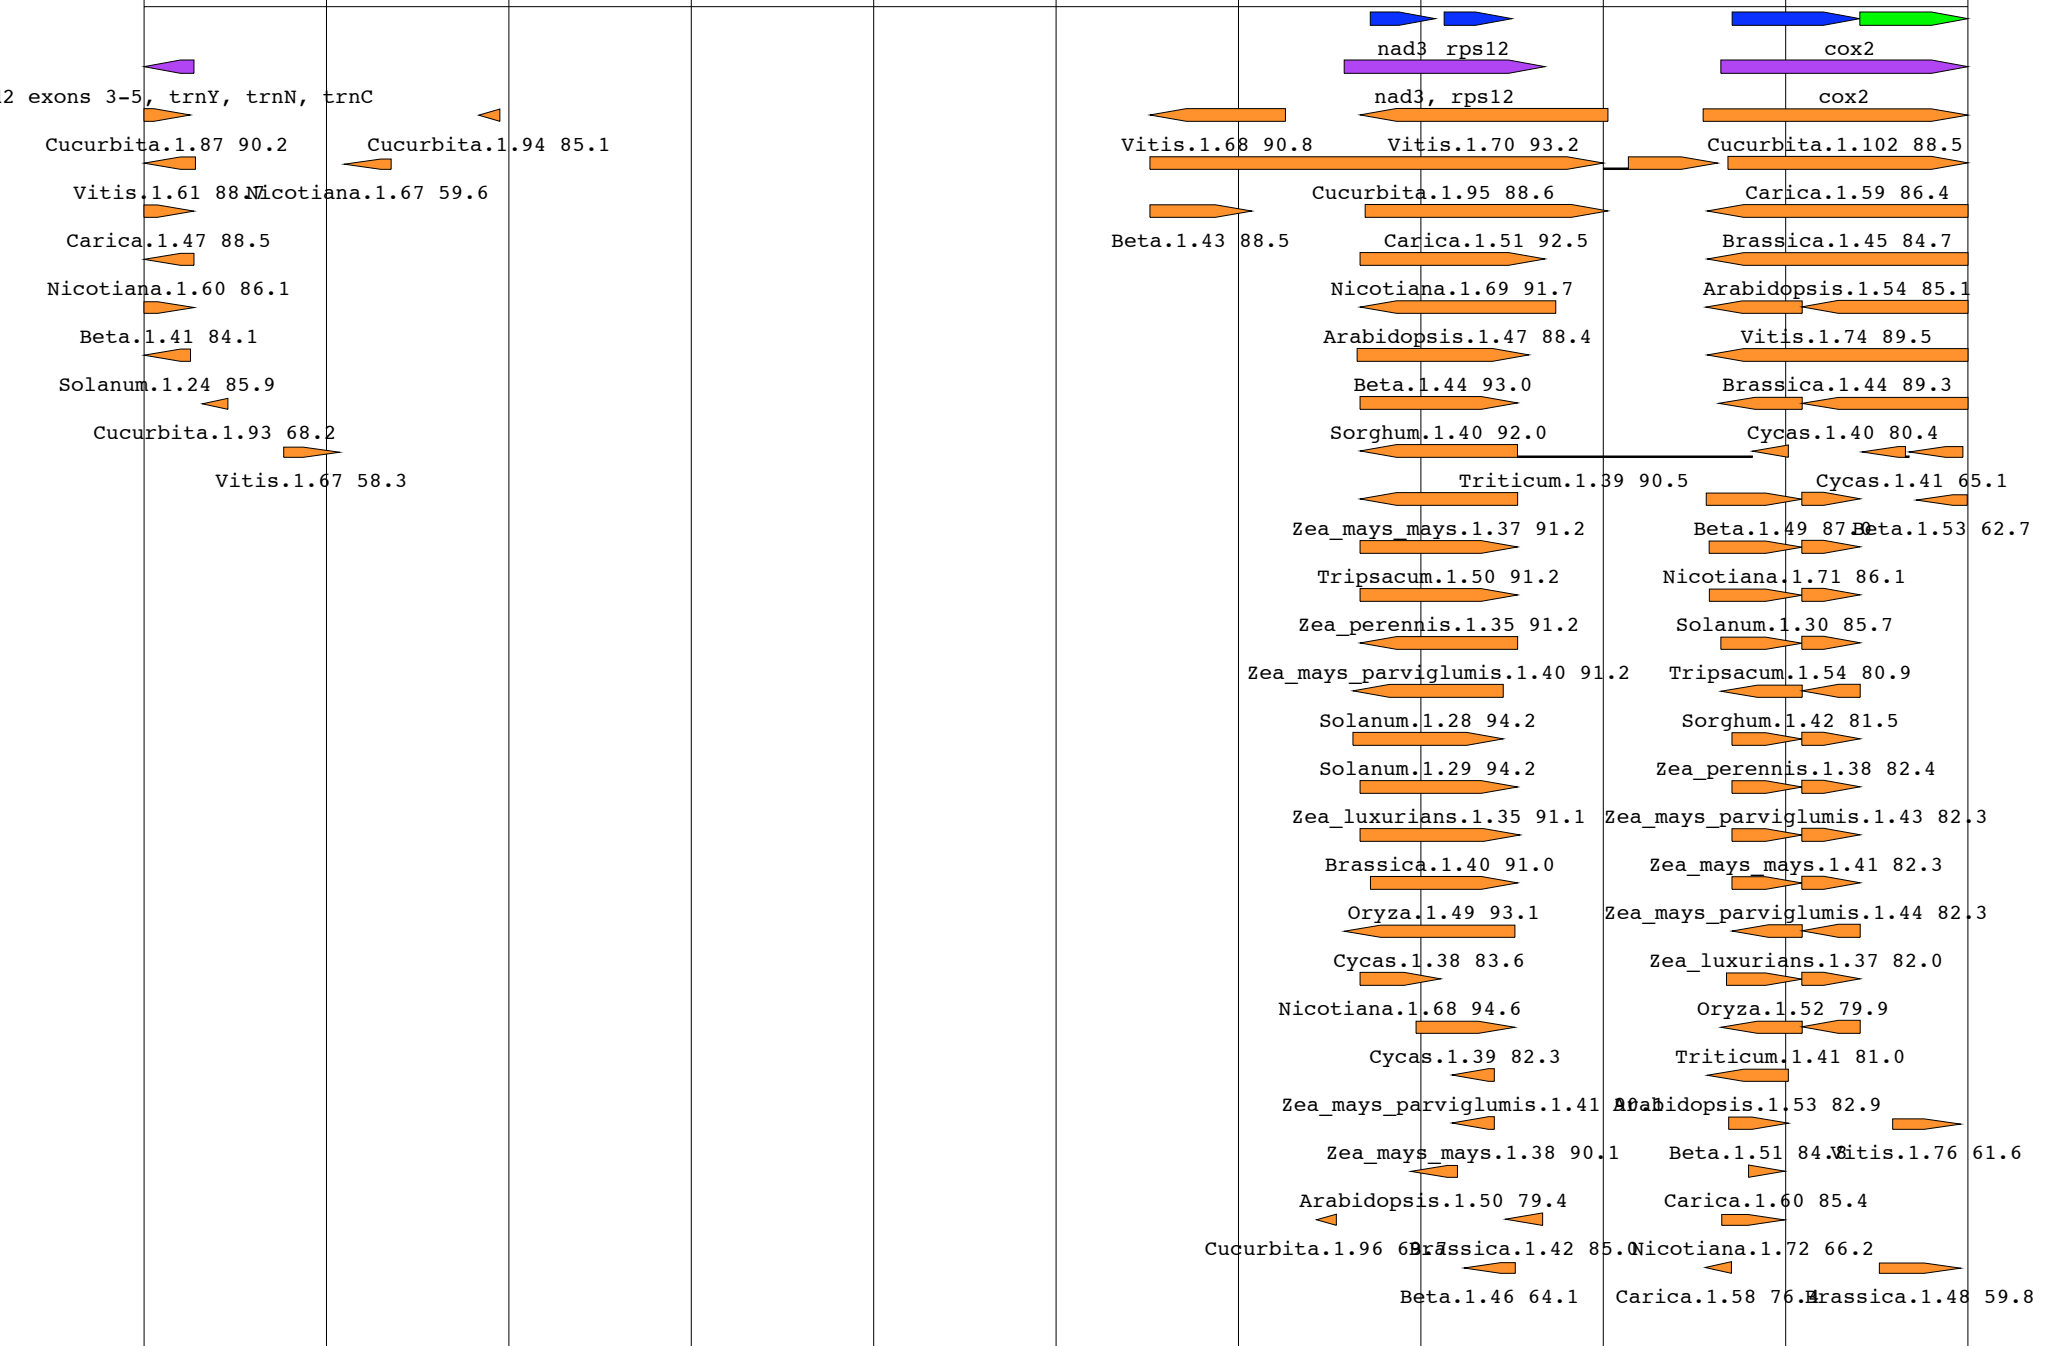

sequence: Citrullus length: 379236

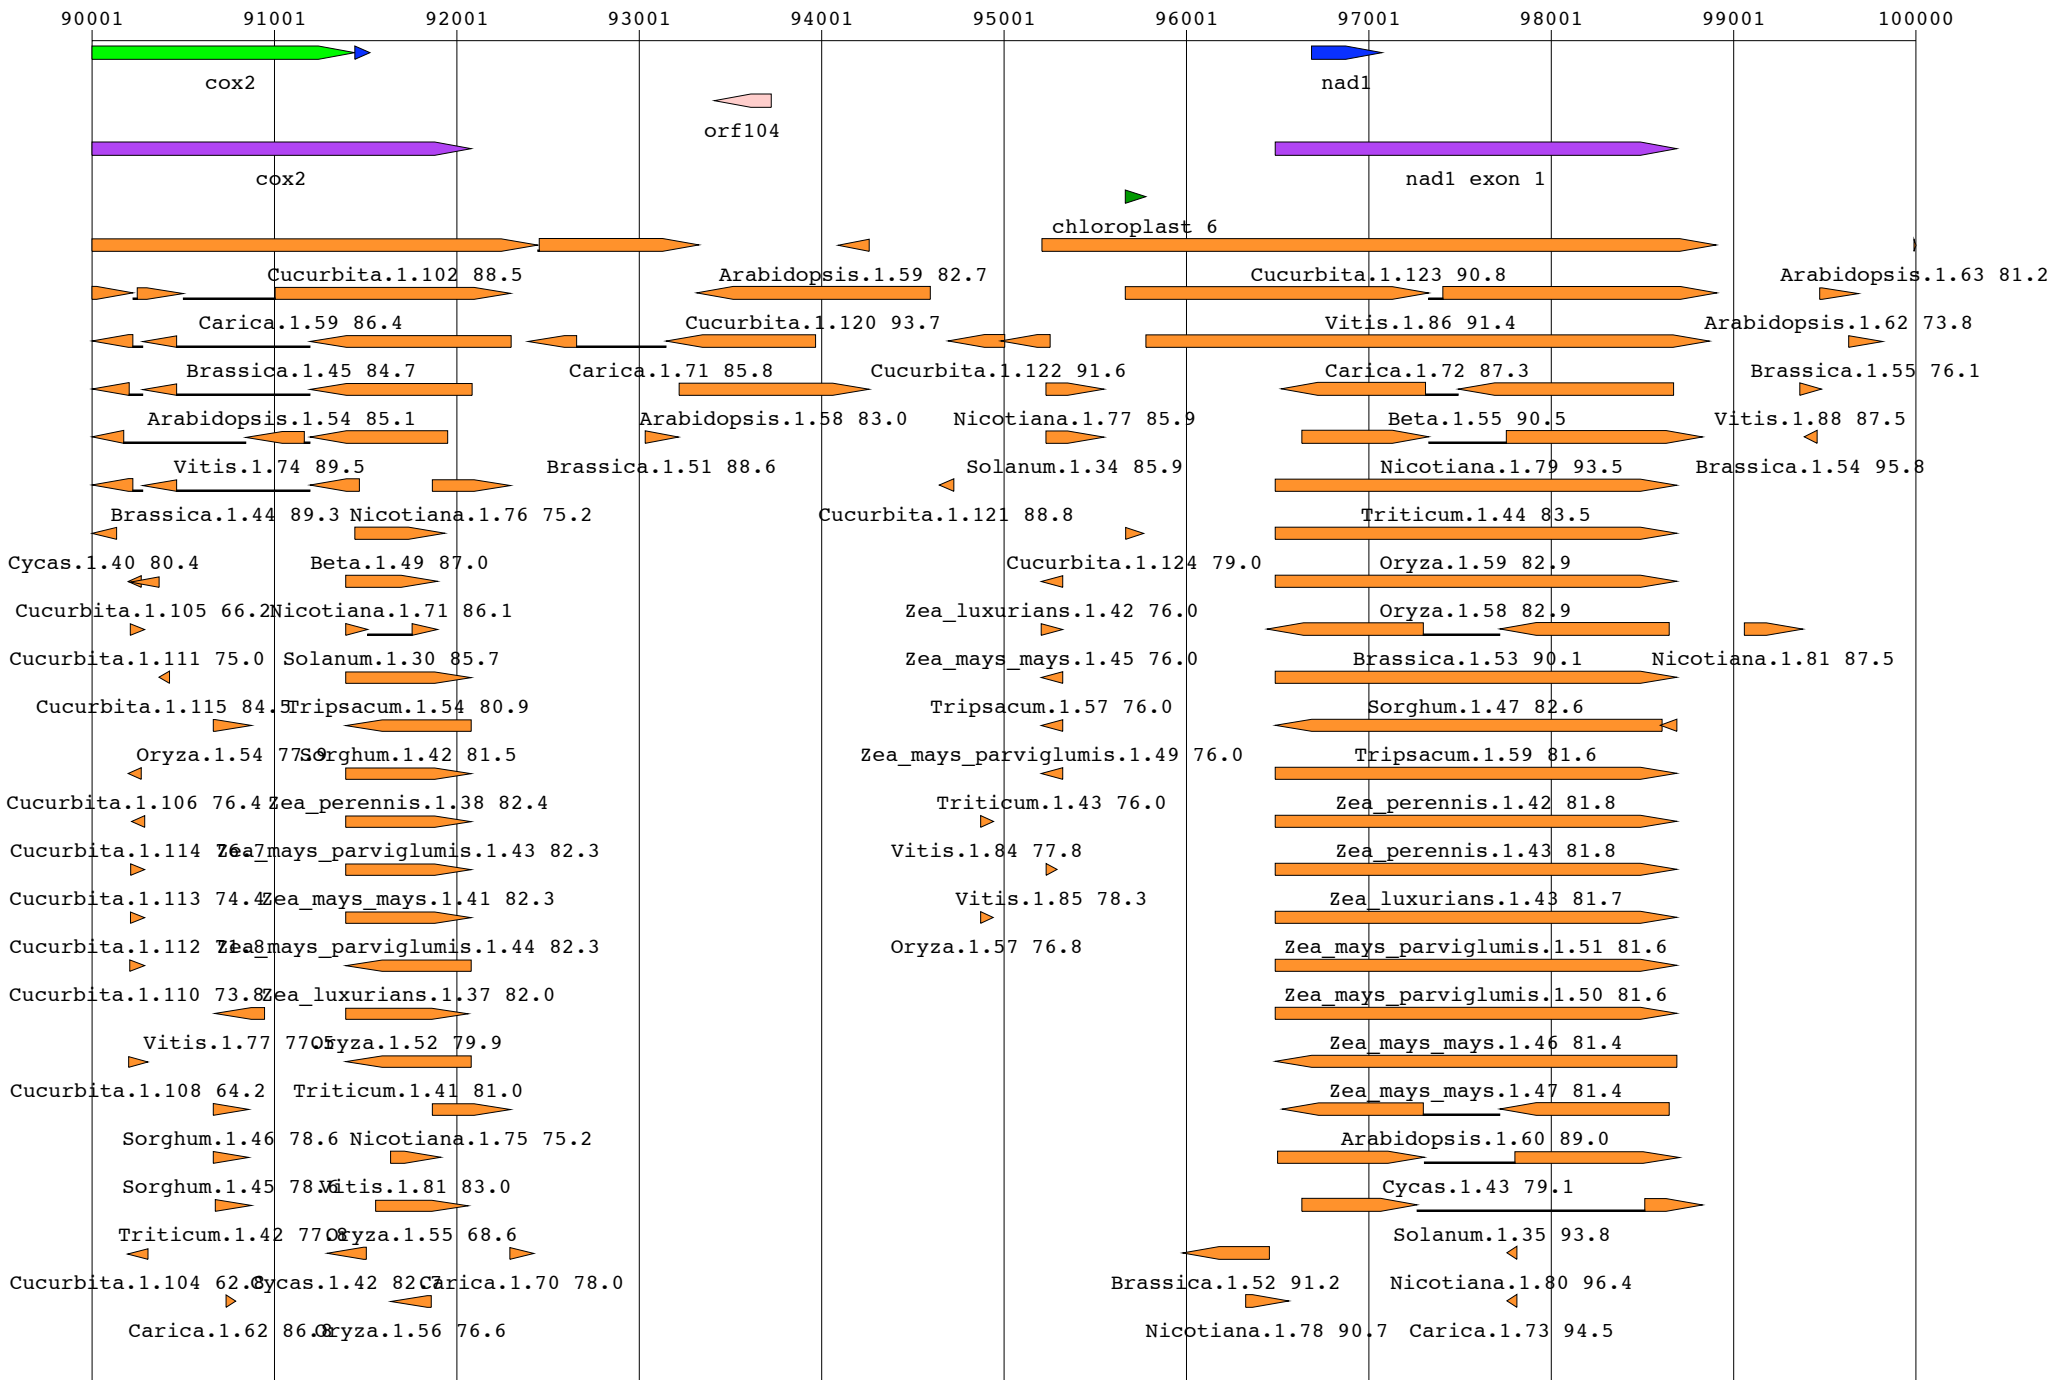

sequence: Citrullus length: 379236

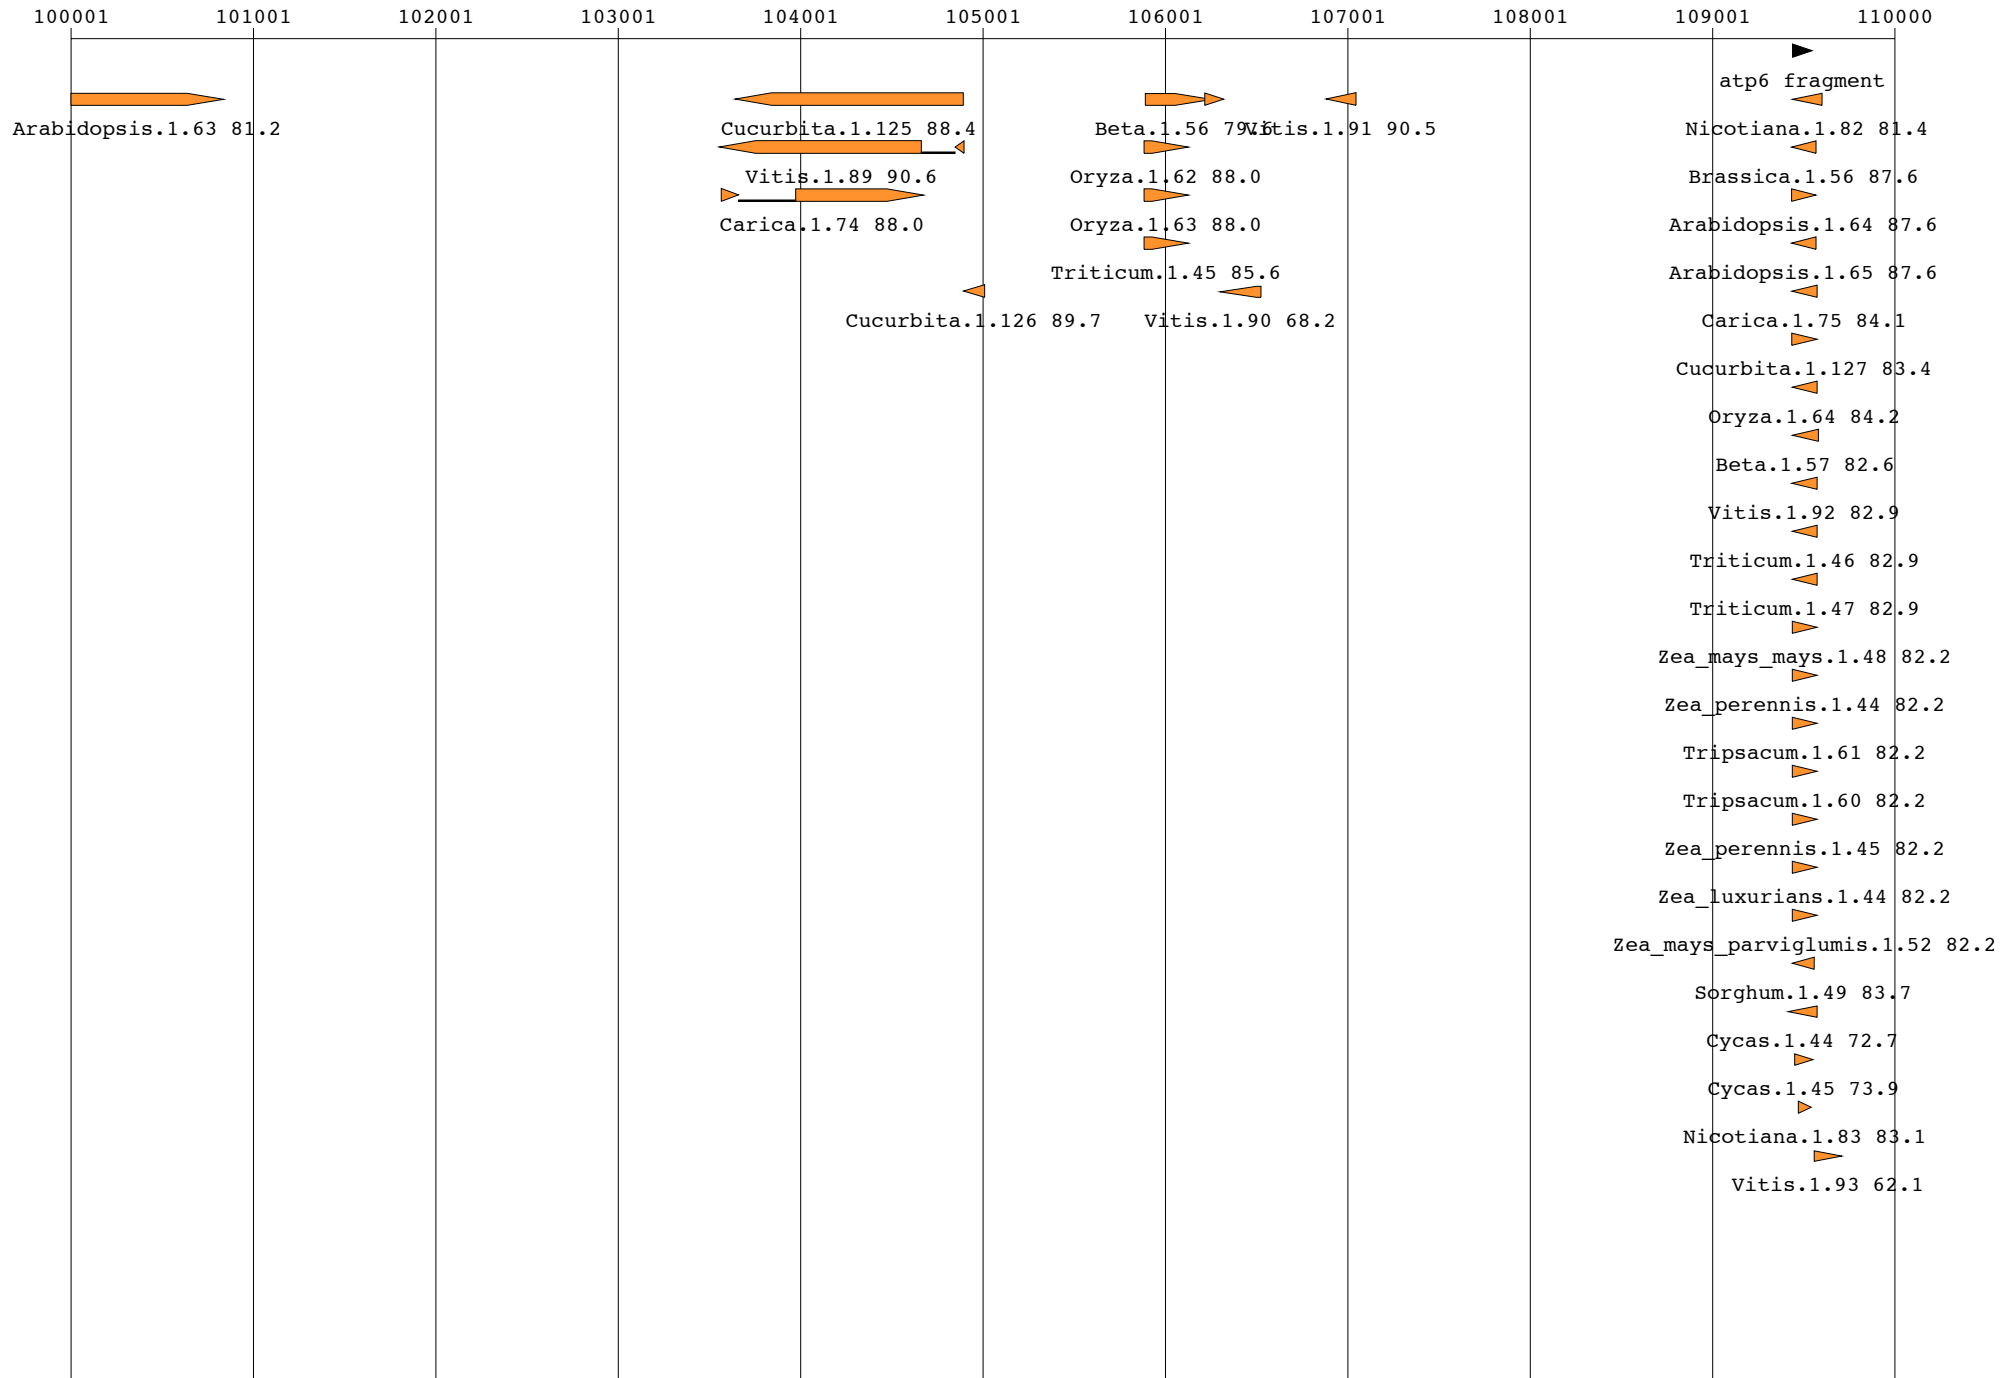

sequence: Citrullus length: 379236

110001 111001 112001 113001 114001 115001 116001 117001 118001 119001 120000

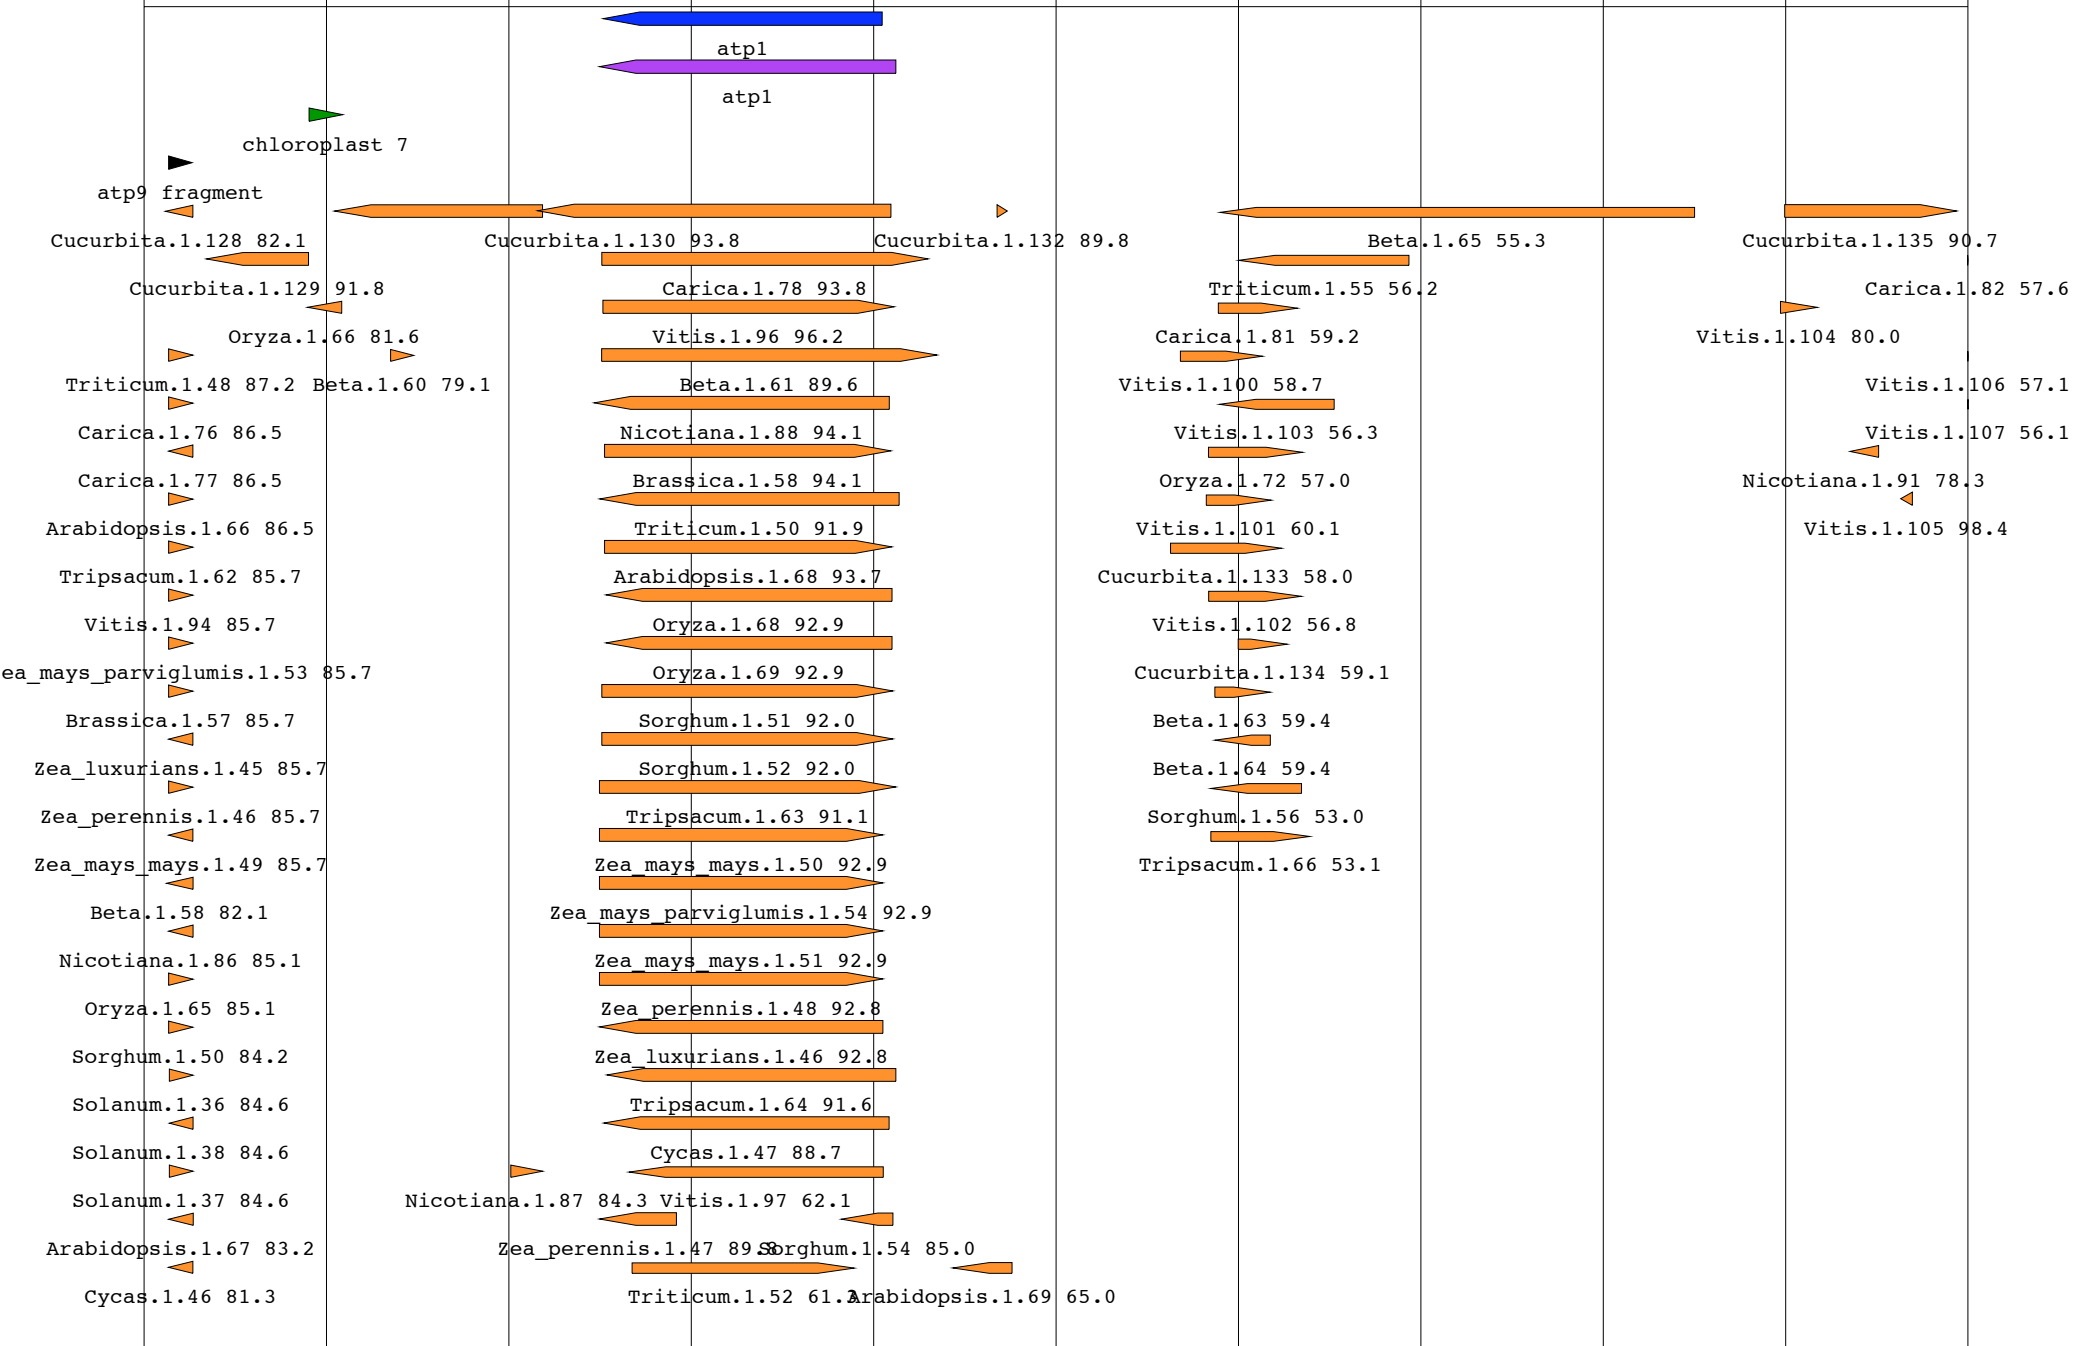

sequence: Citrullus length: 379236

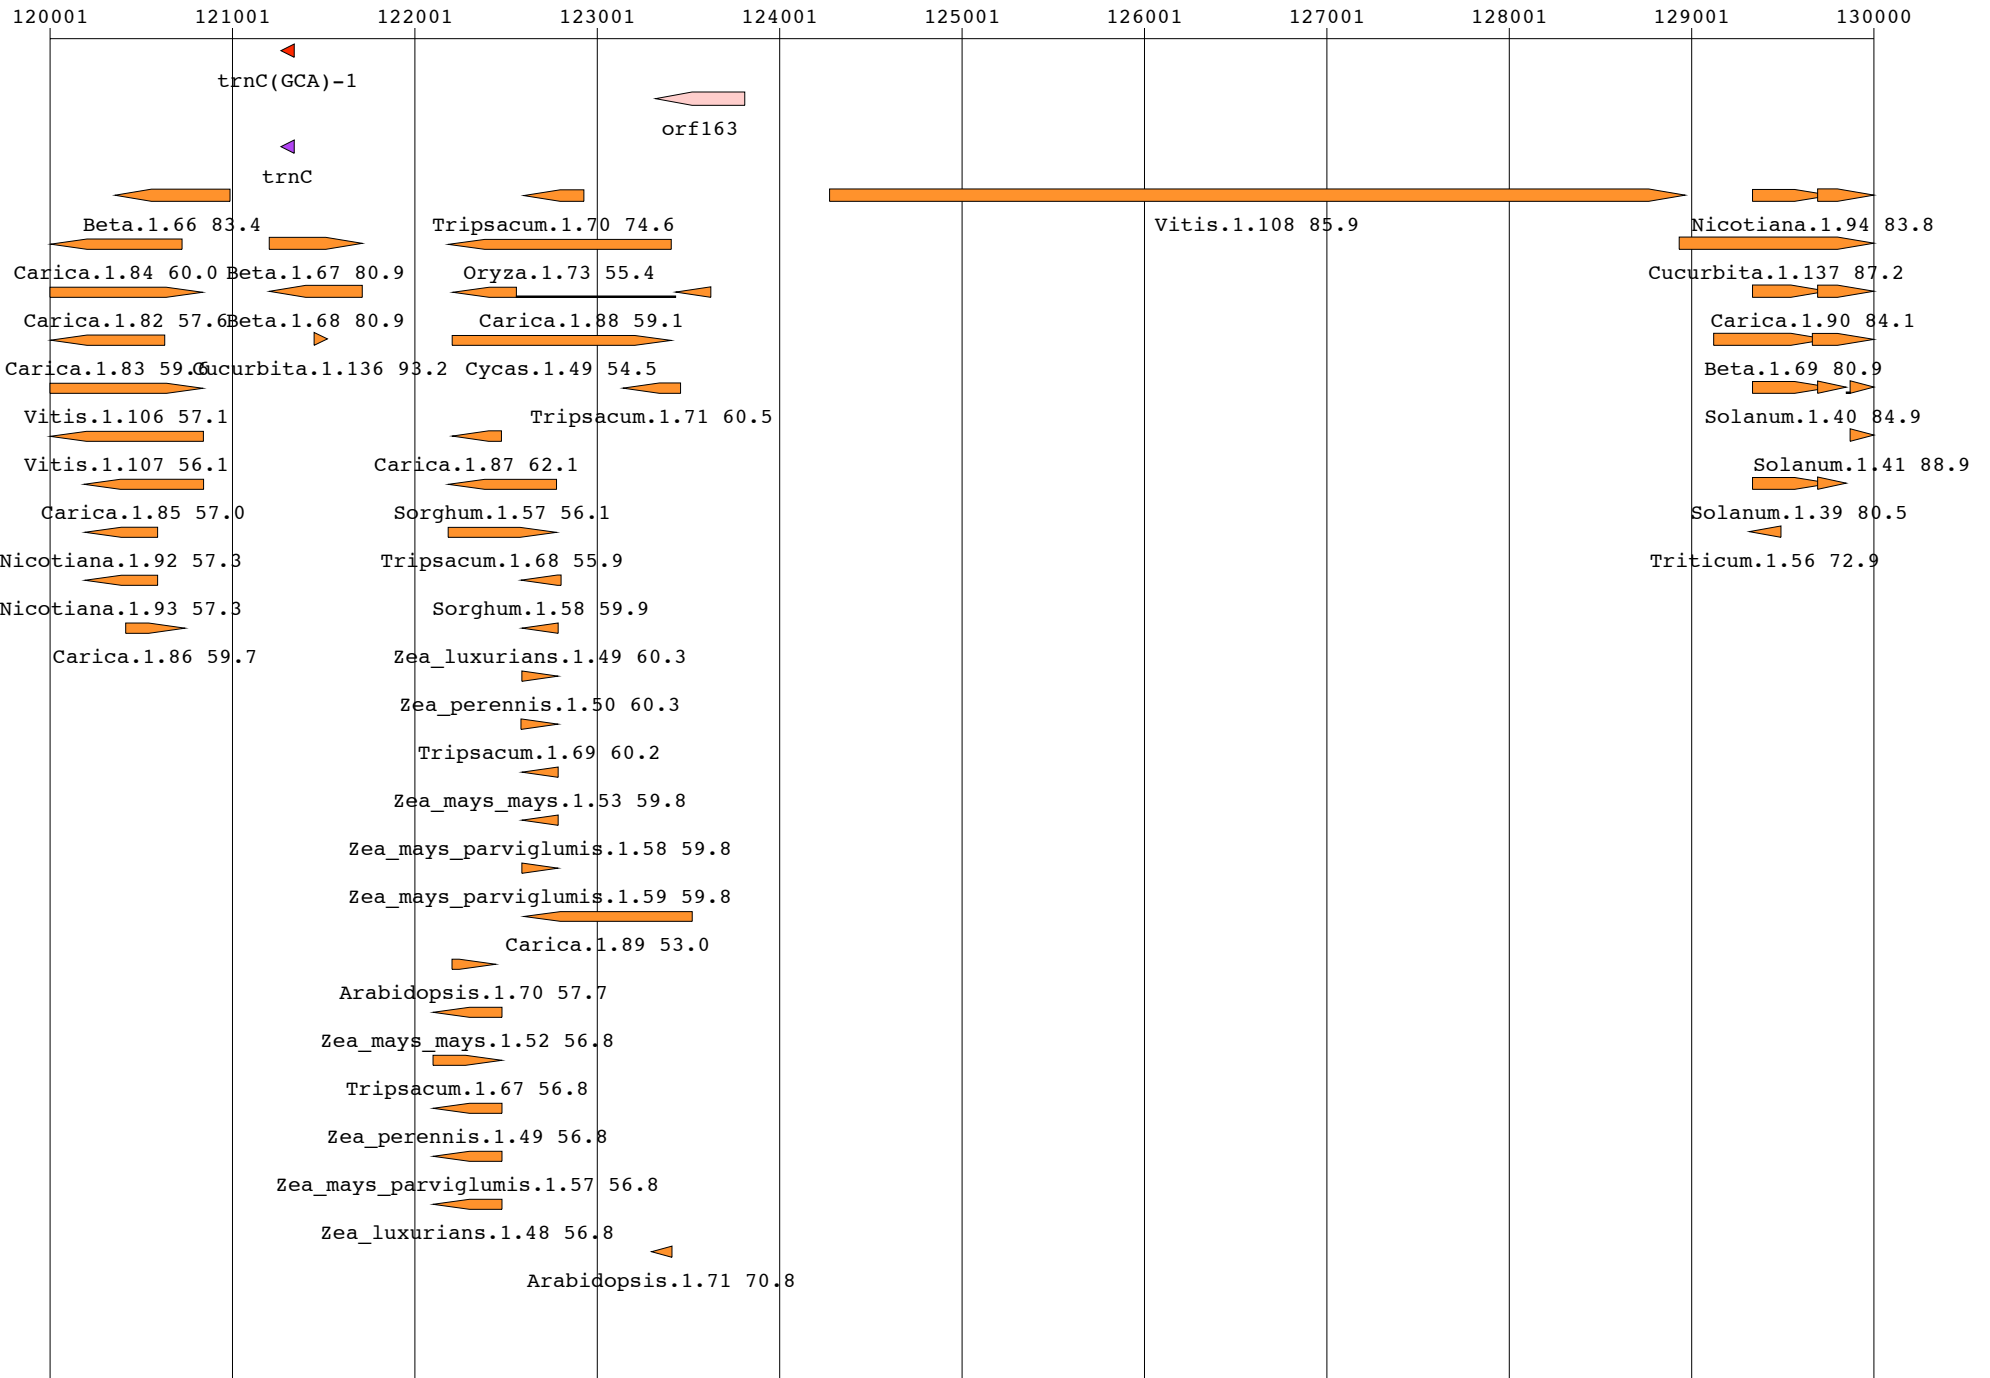

sequence: Citrullus length: 379236

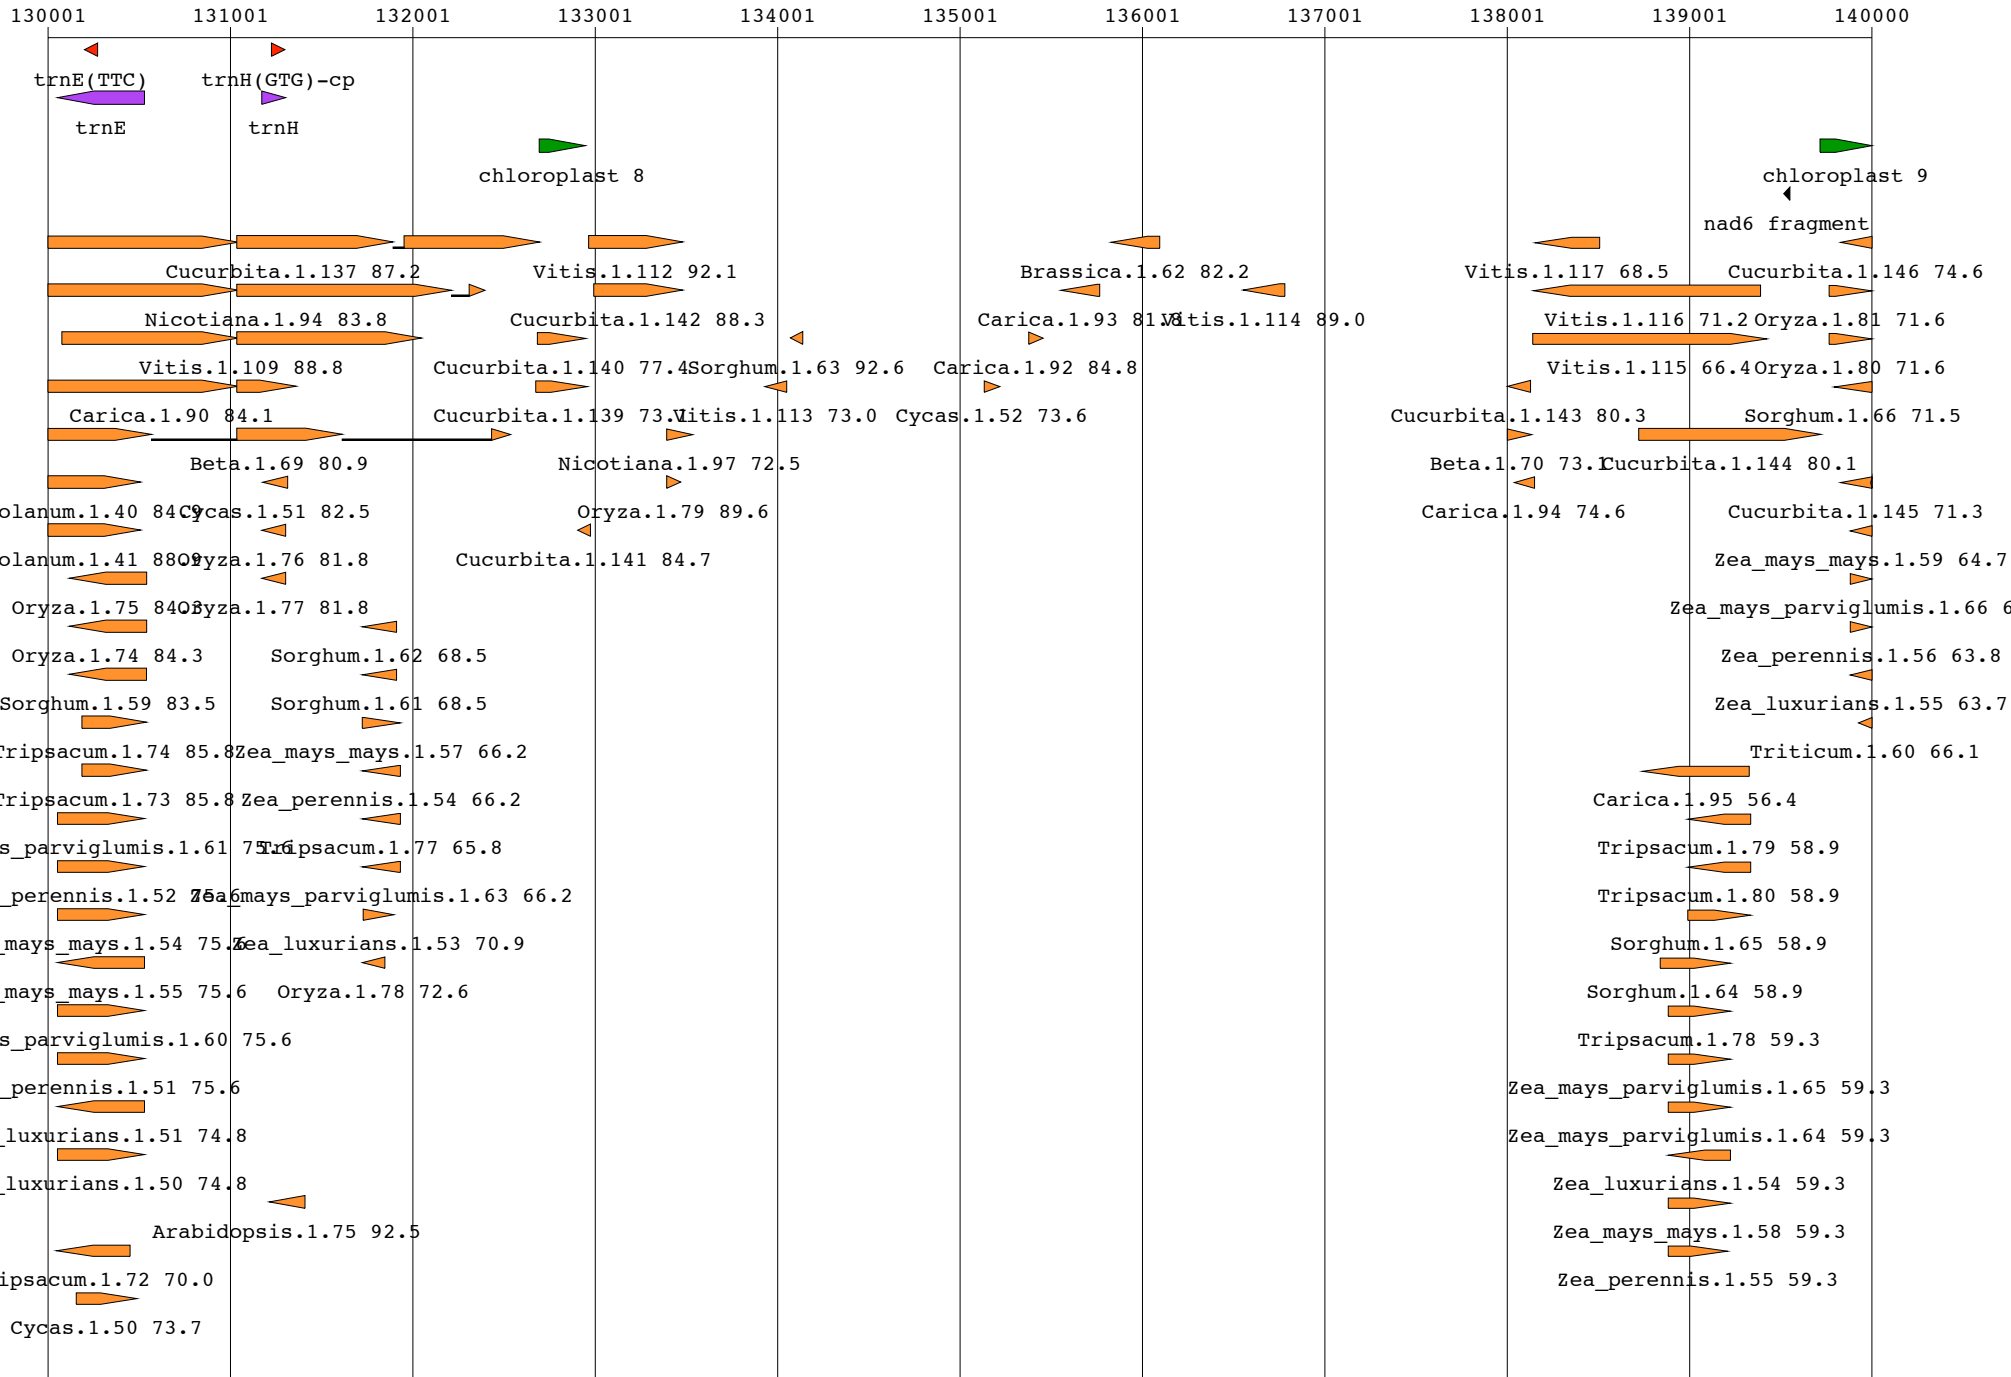

sequence: Citrullus length: 379236

140001 141001 142001 143001 144001 145001 146001 147001 148001 149001 150000

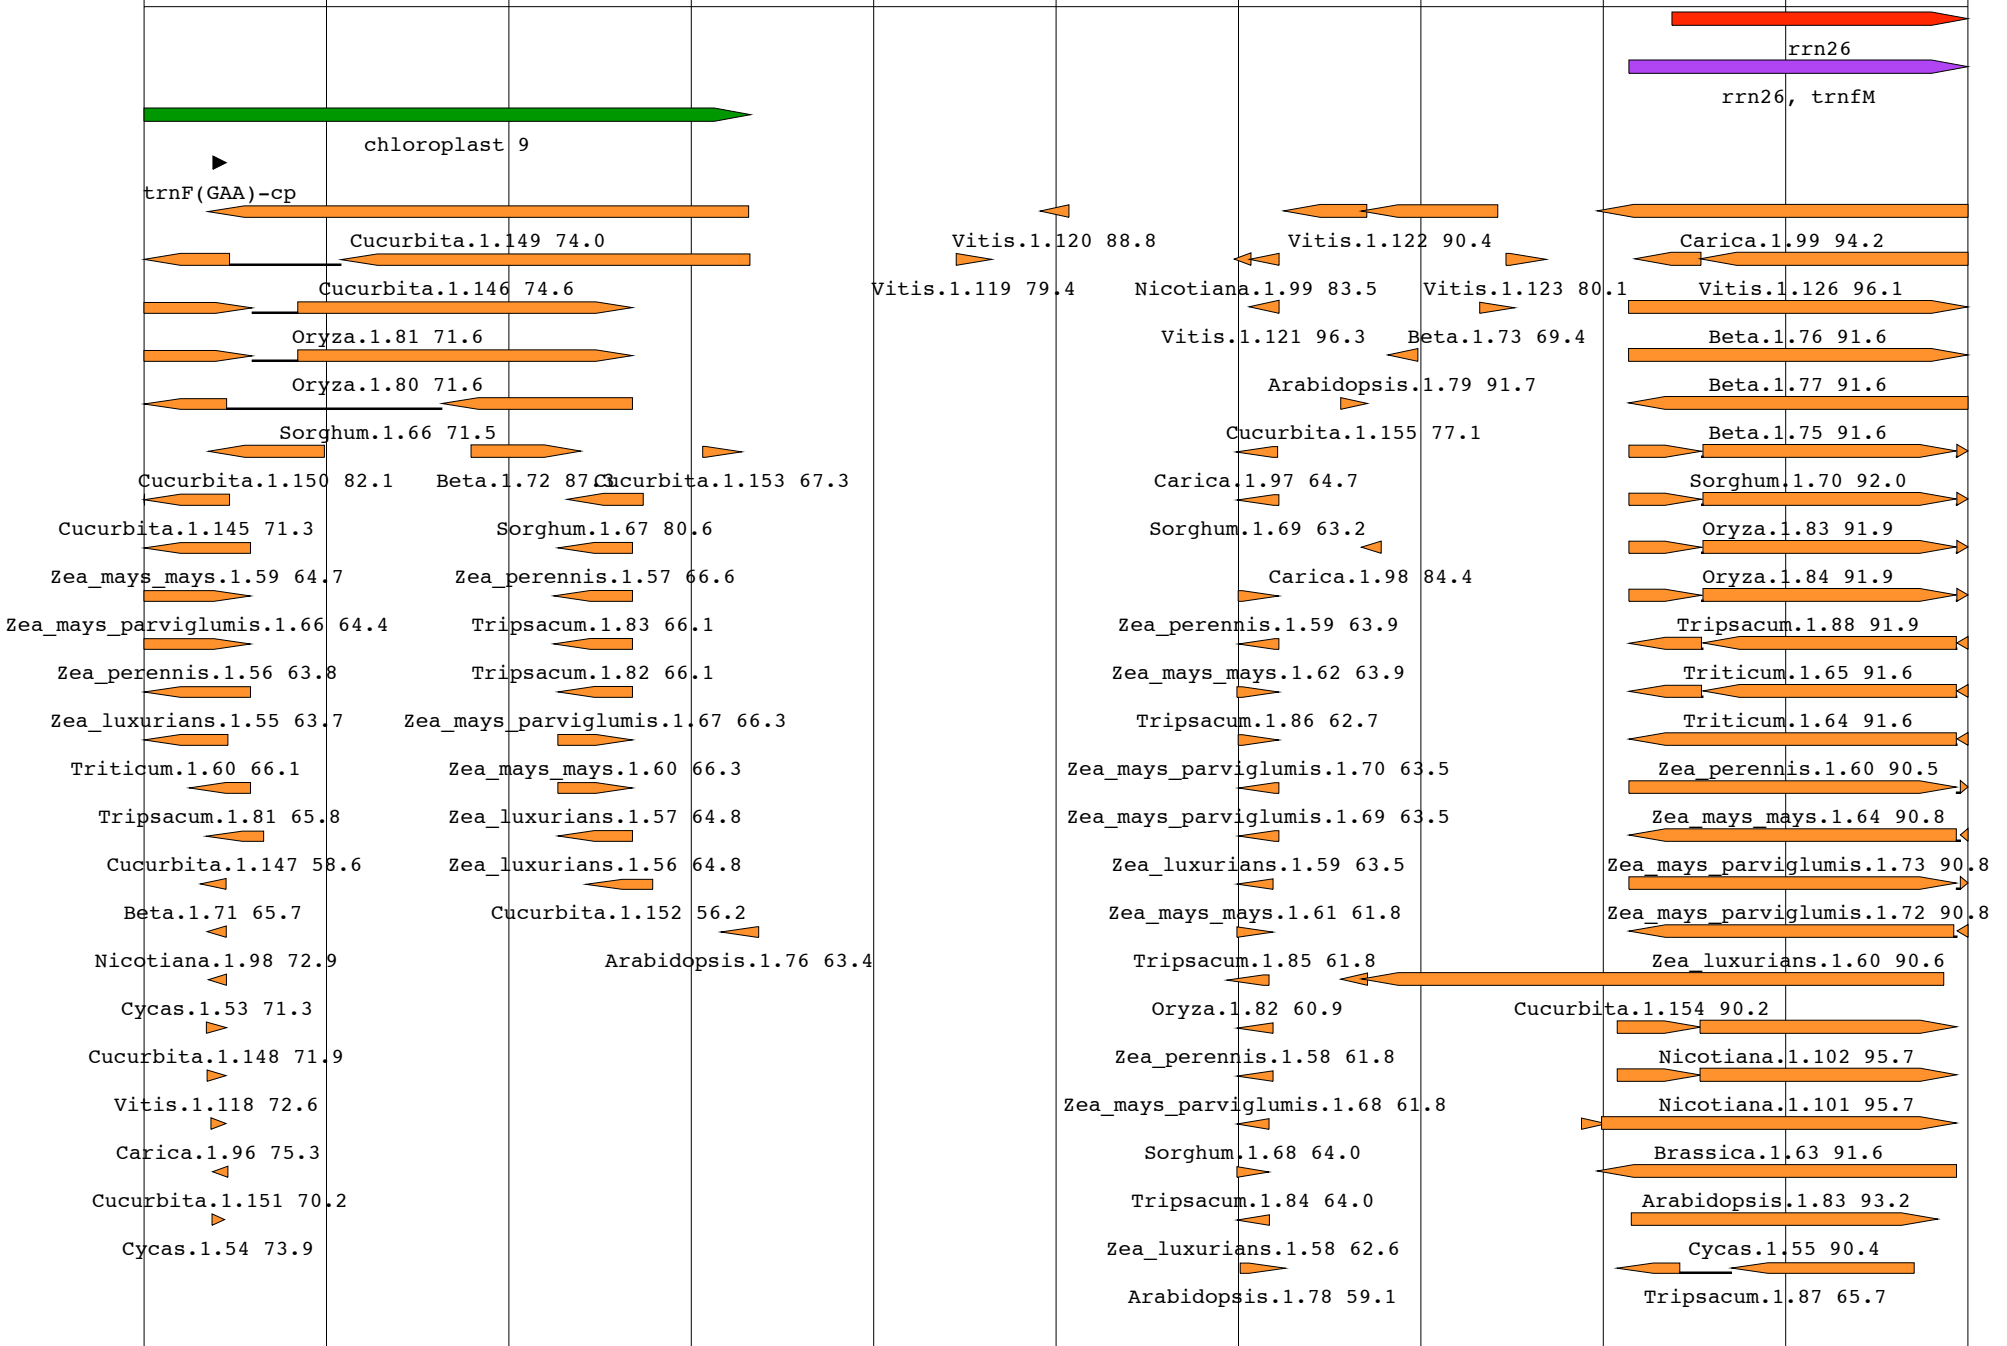

sequence: Citrullus length: 379236

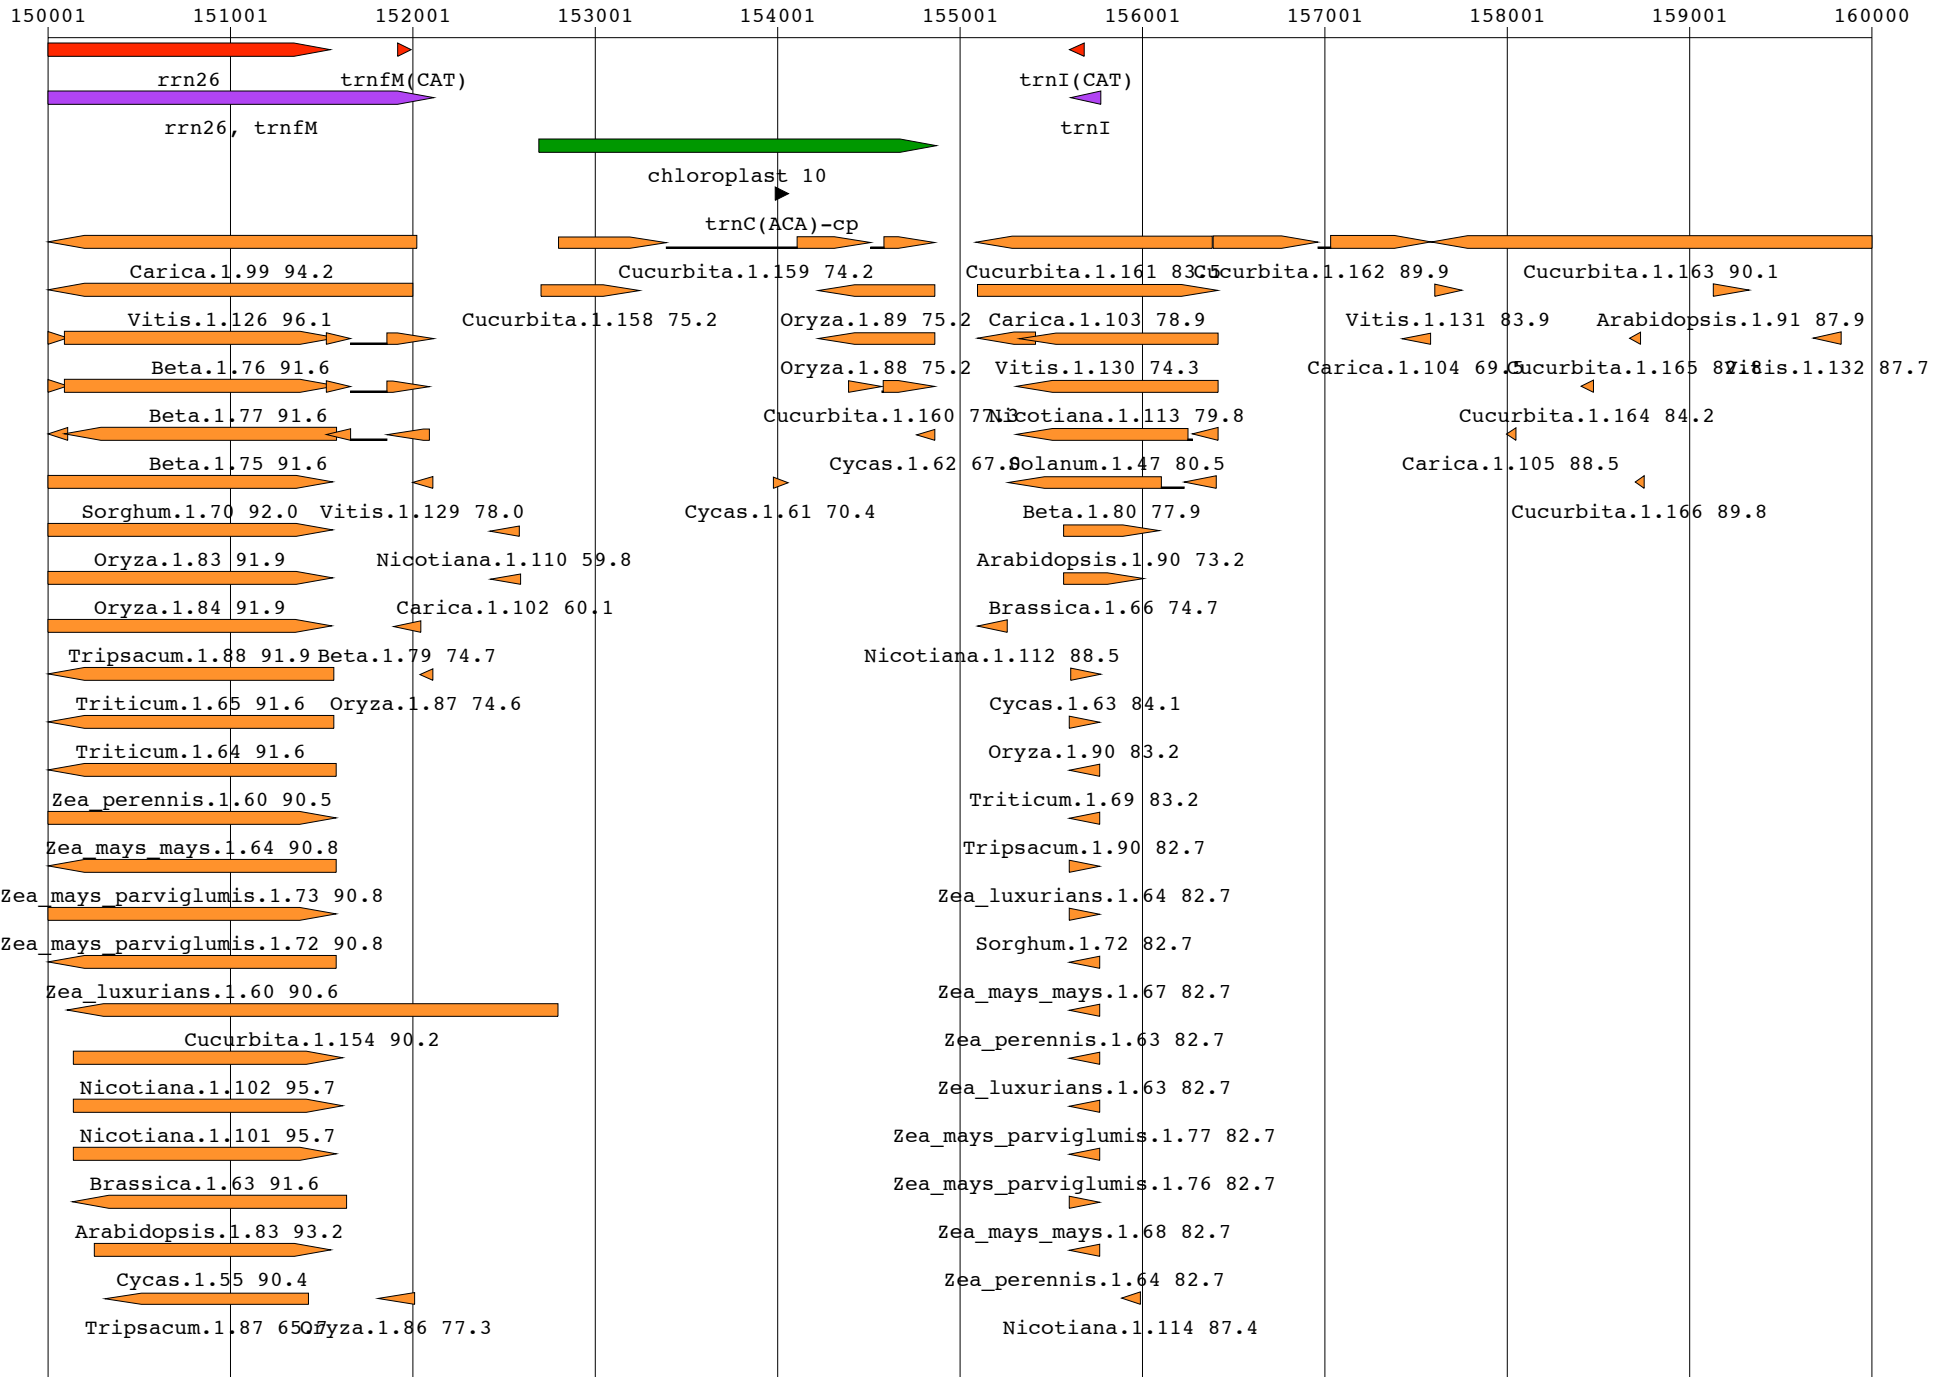



sequence: Citrullus length: 379236

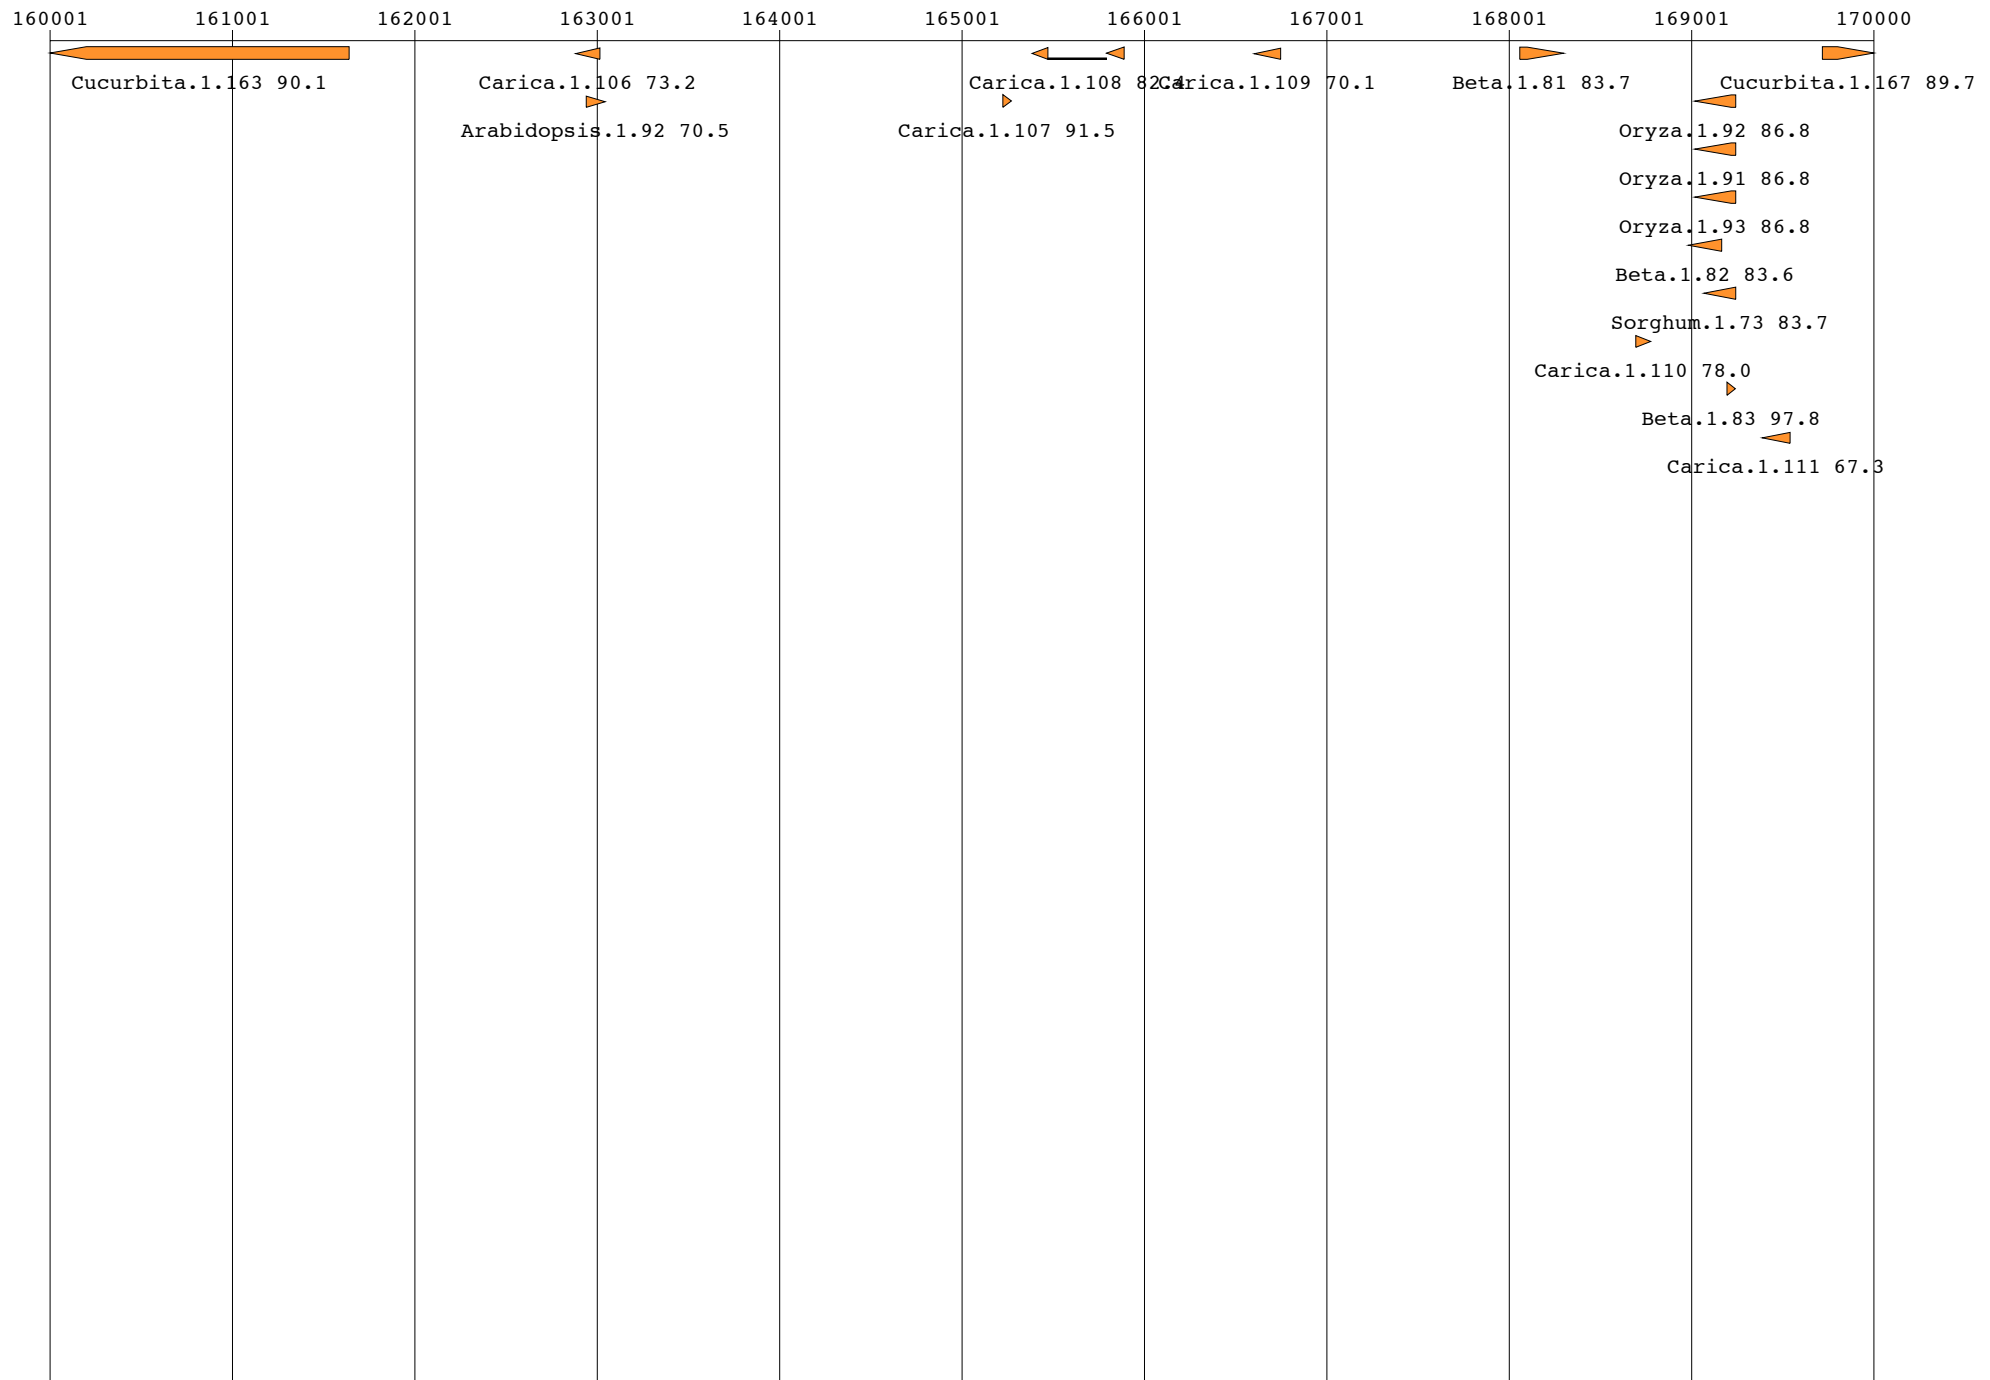

sequence: Citrullus length: 379236

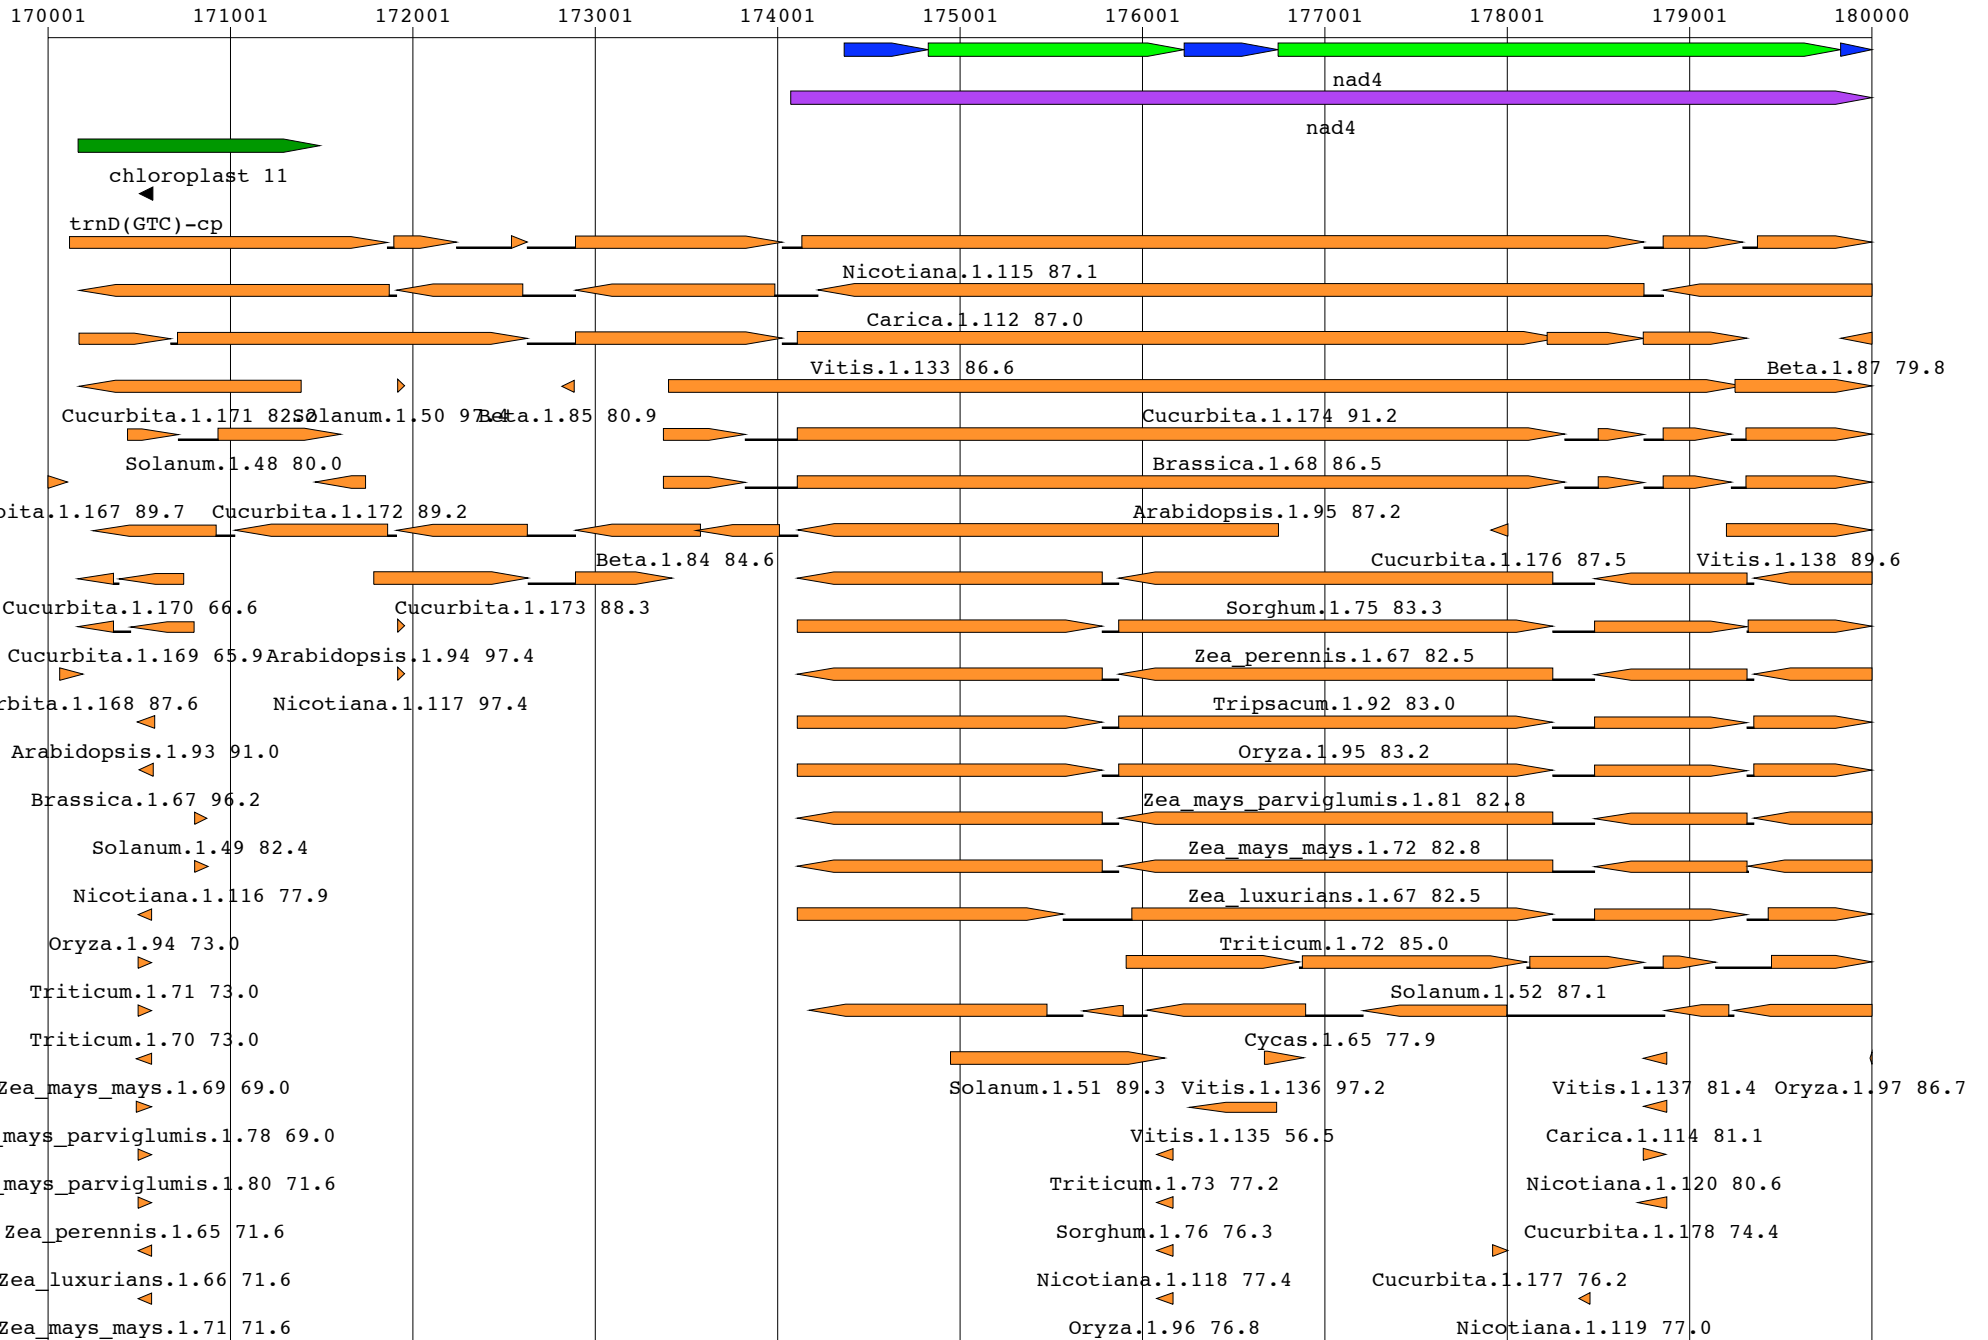

sequence: Citrullus length: 379236

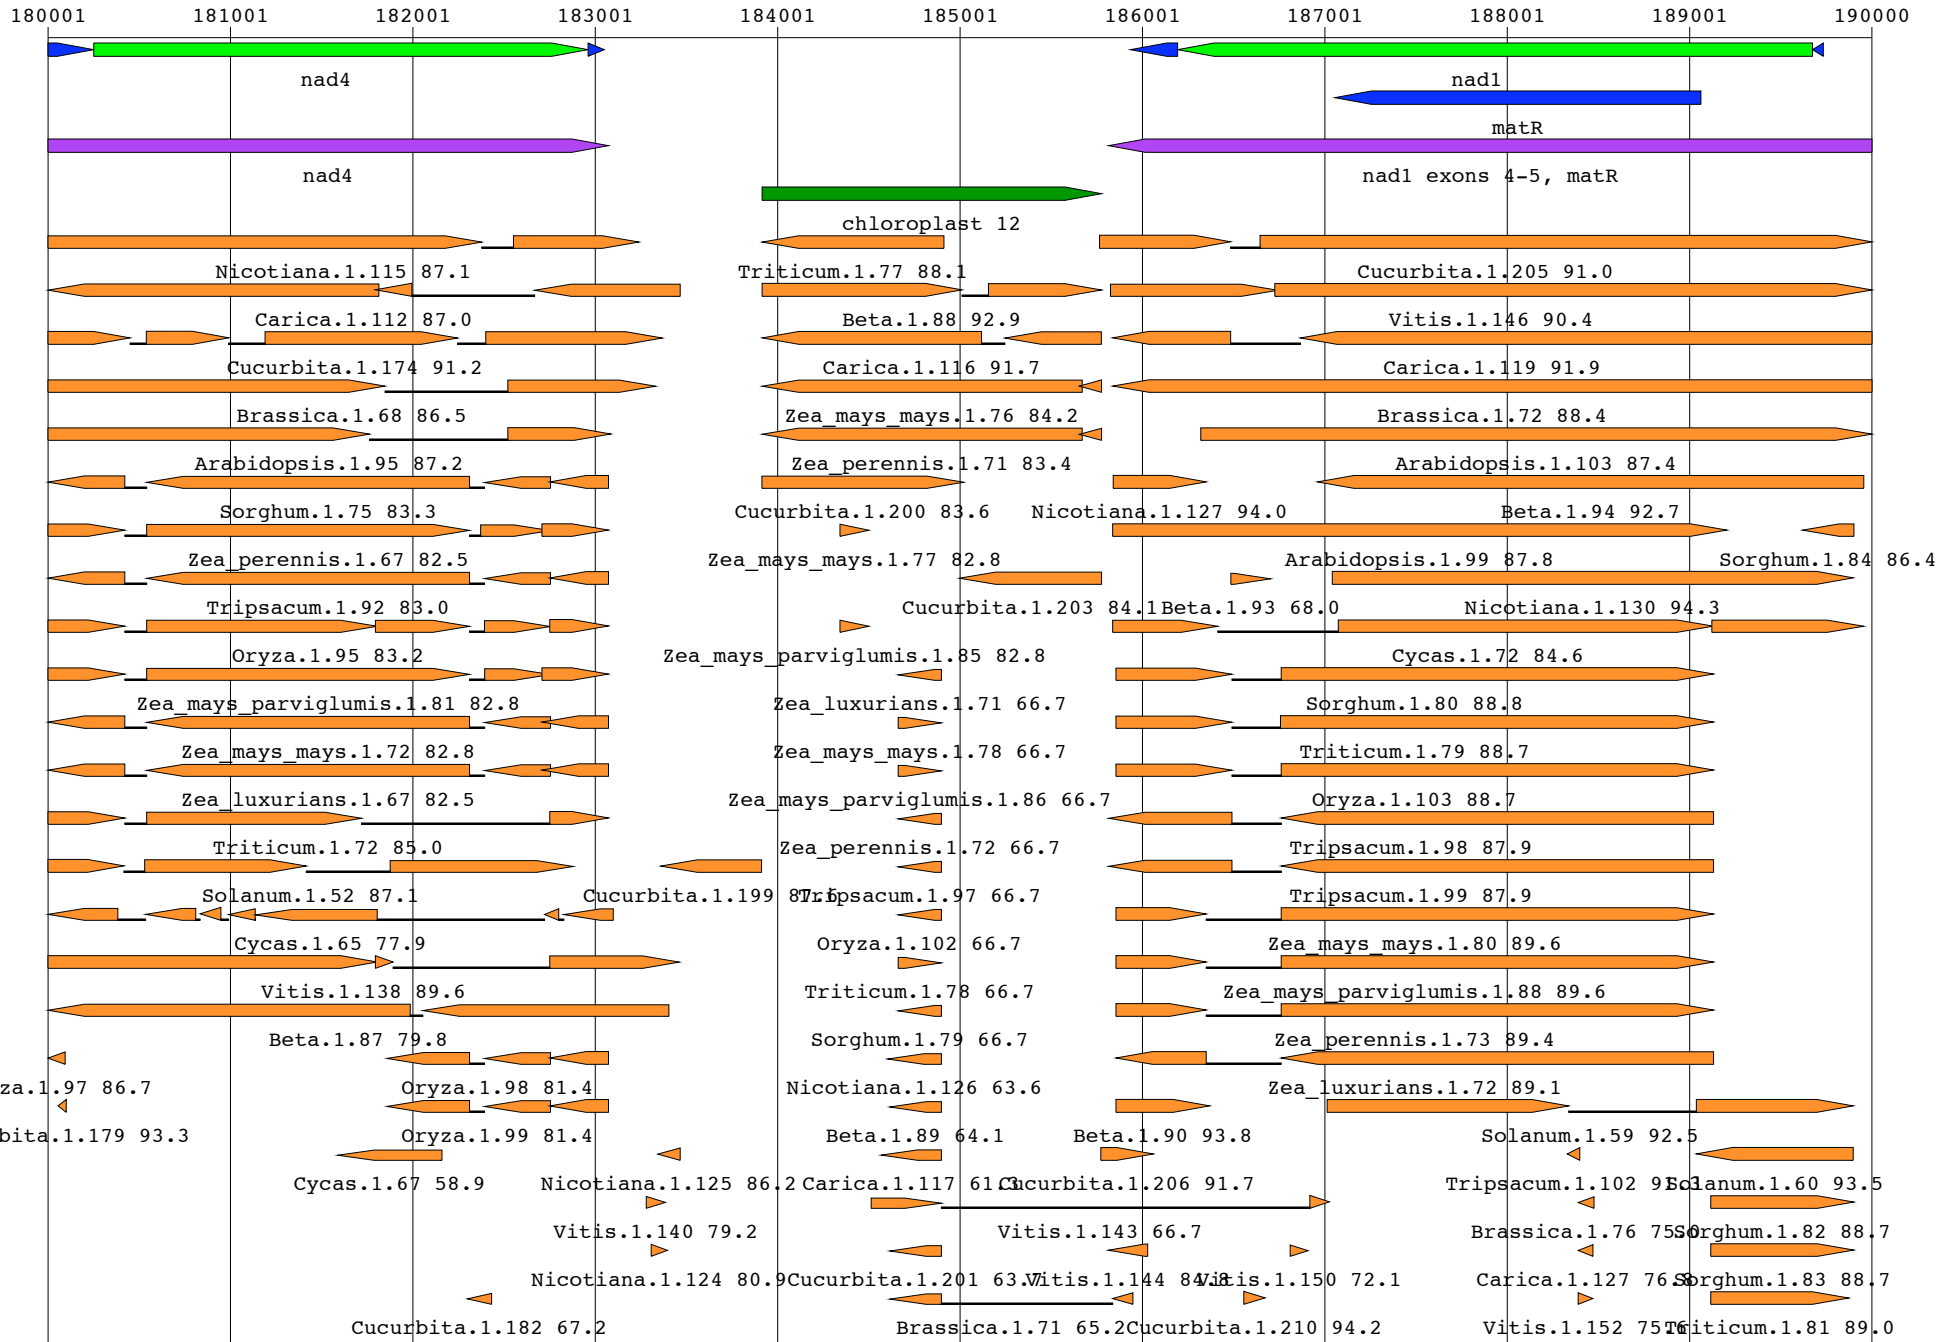

sequence: Citrullus length: 379236

190001 191001 192001 193001 194001 195001 196001 197001 198001 199001 200000

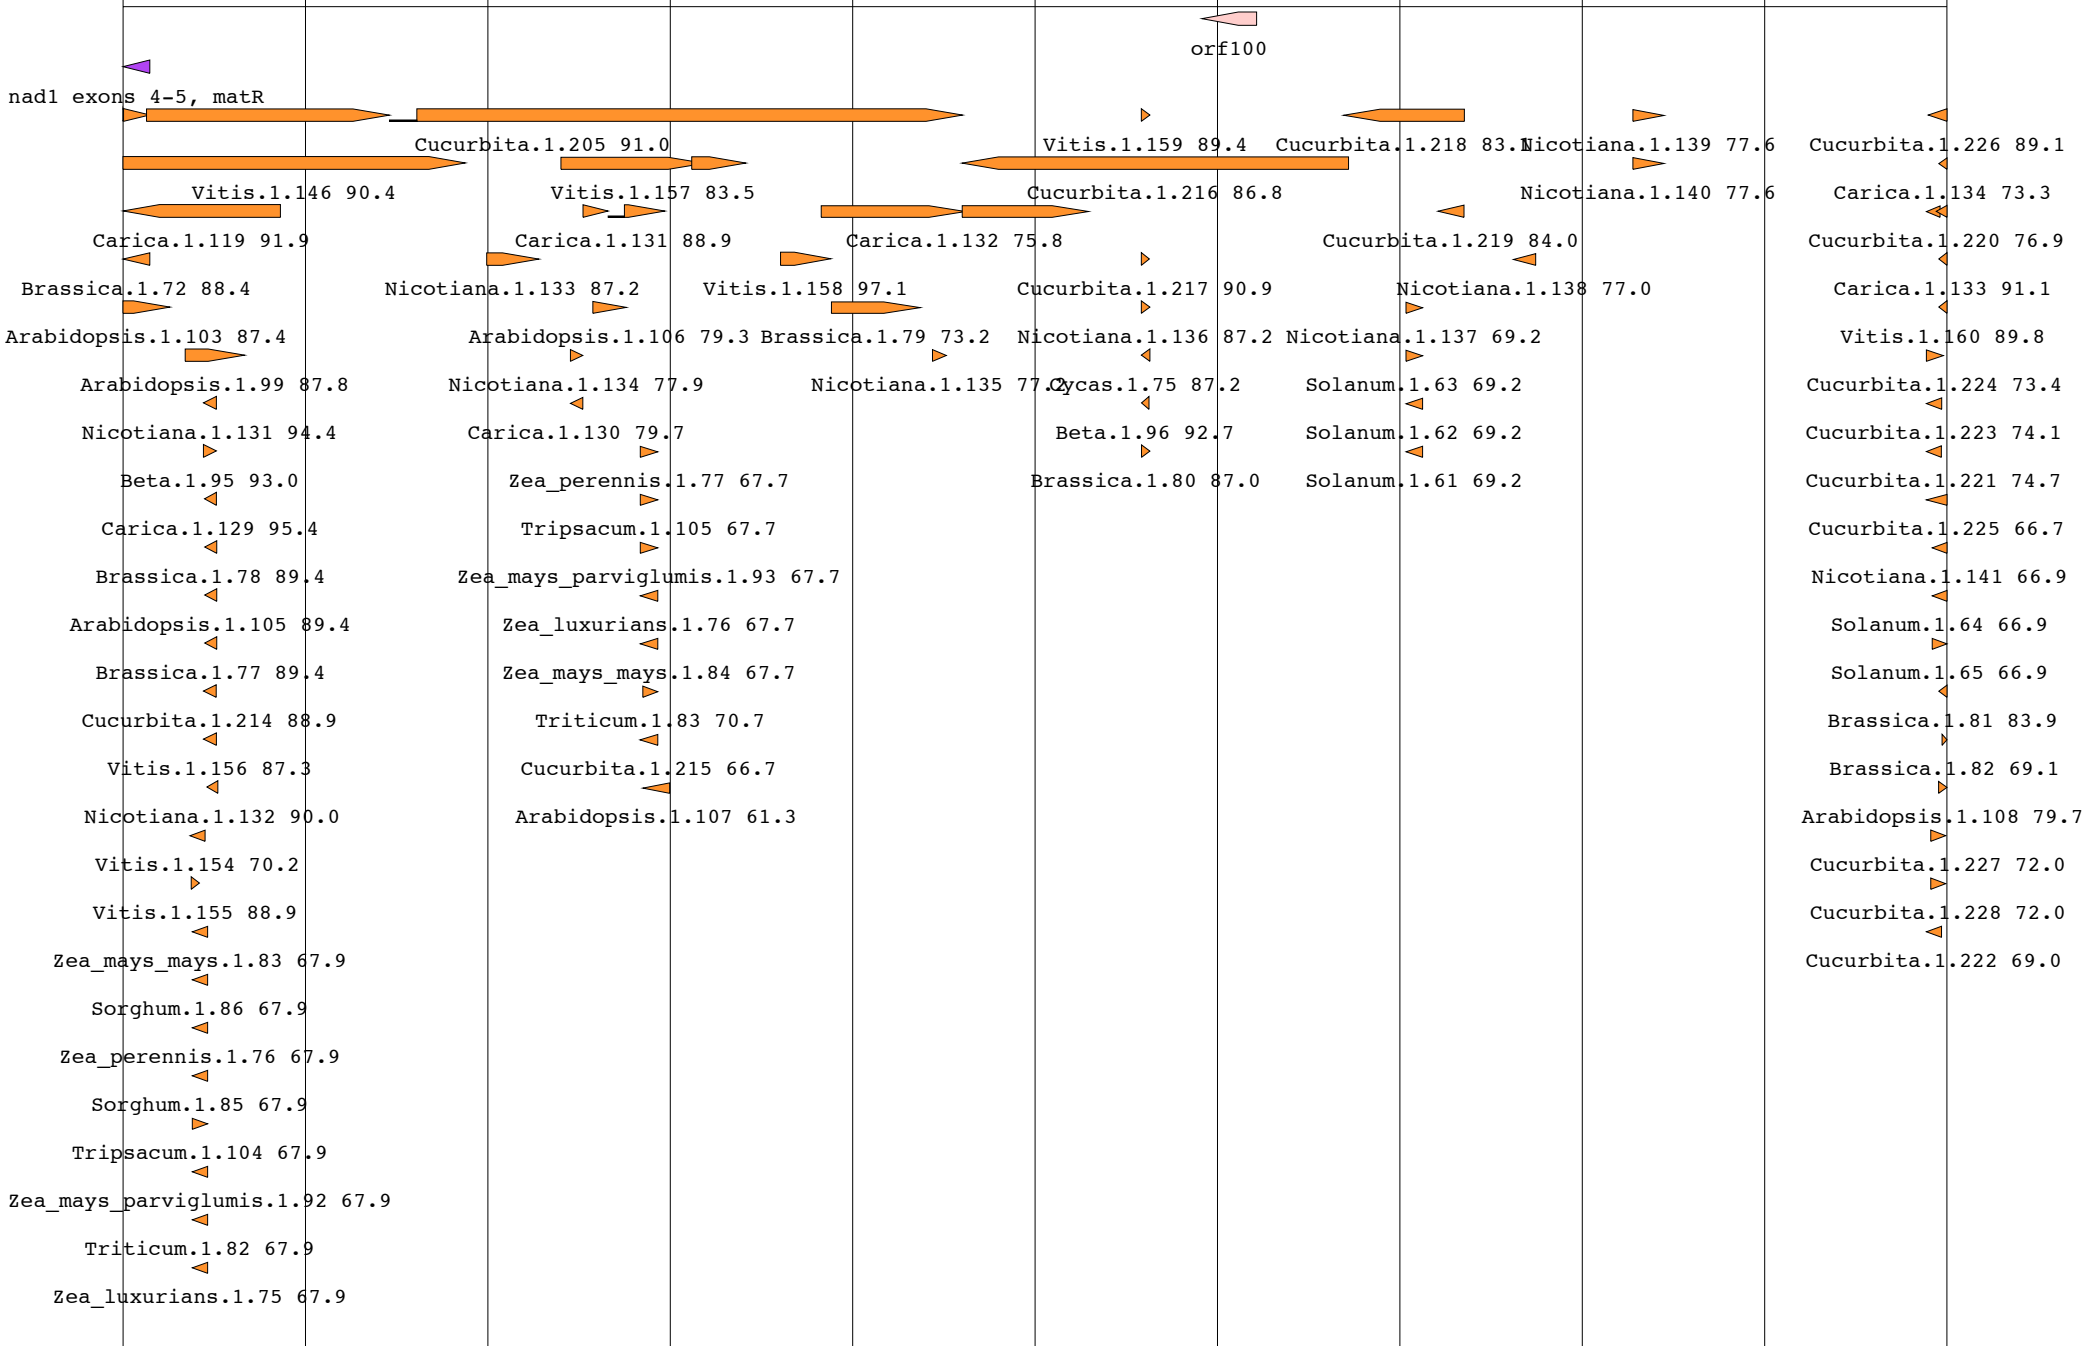

sequence: Citrullus length: 379236

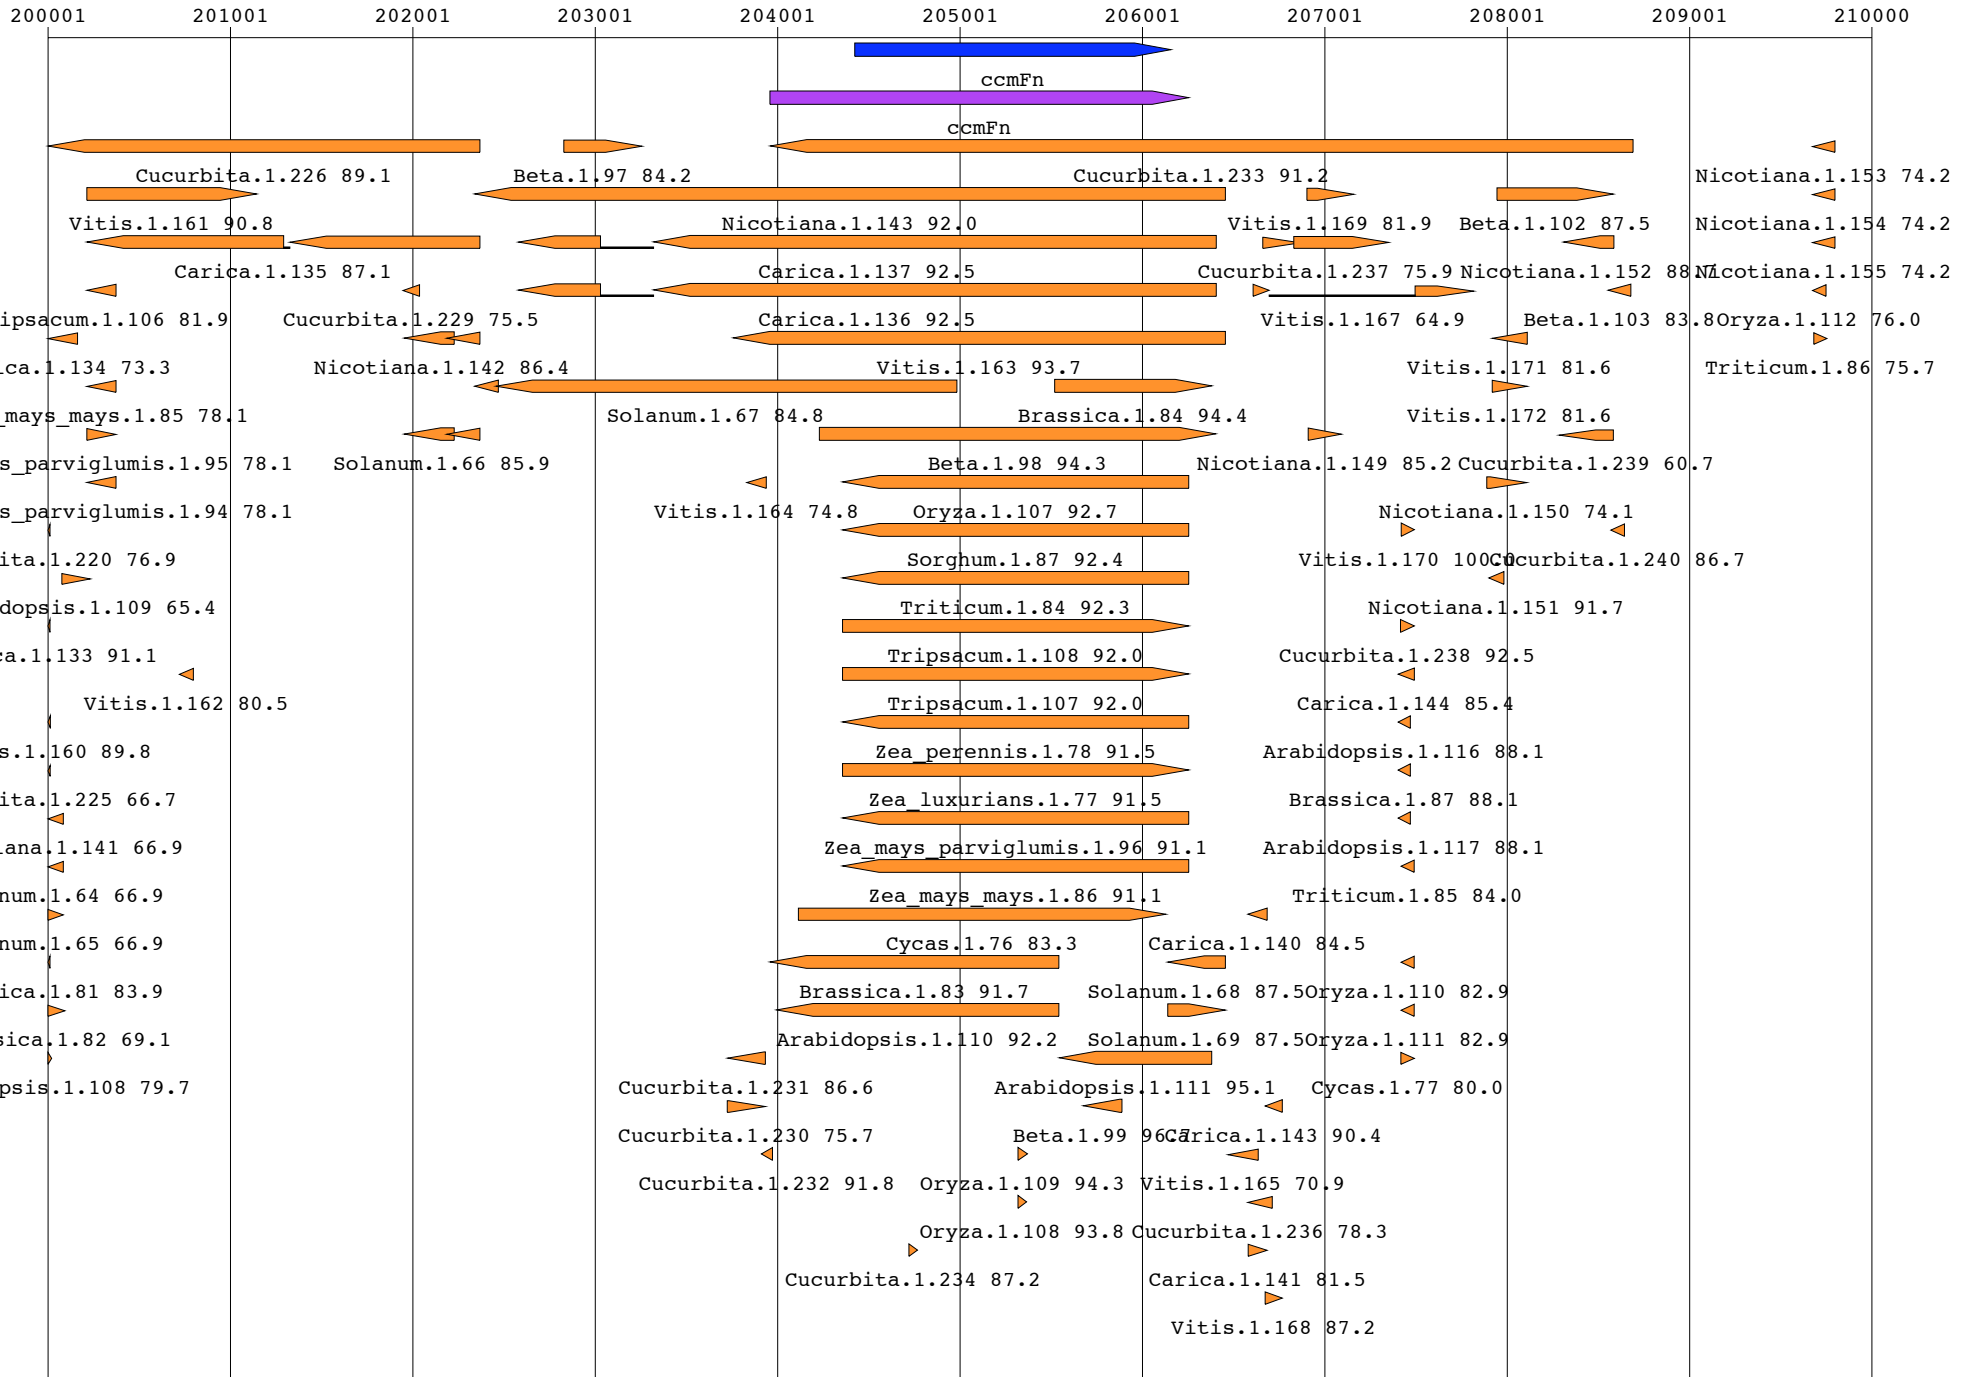

sequence: Citrullus length: 379236

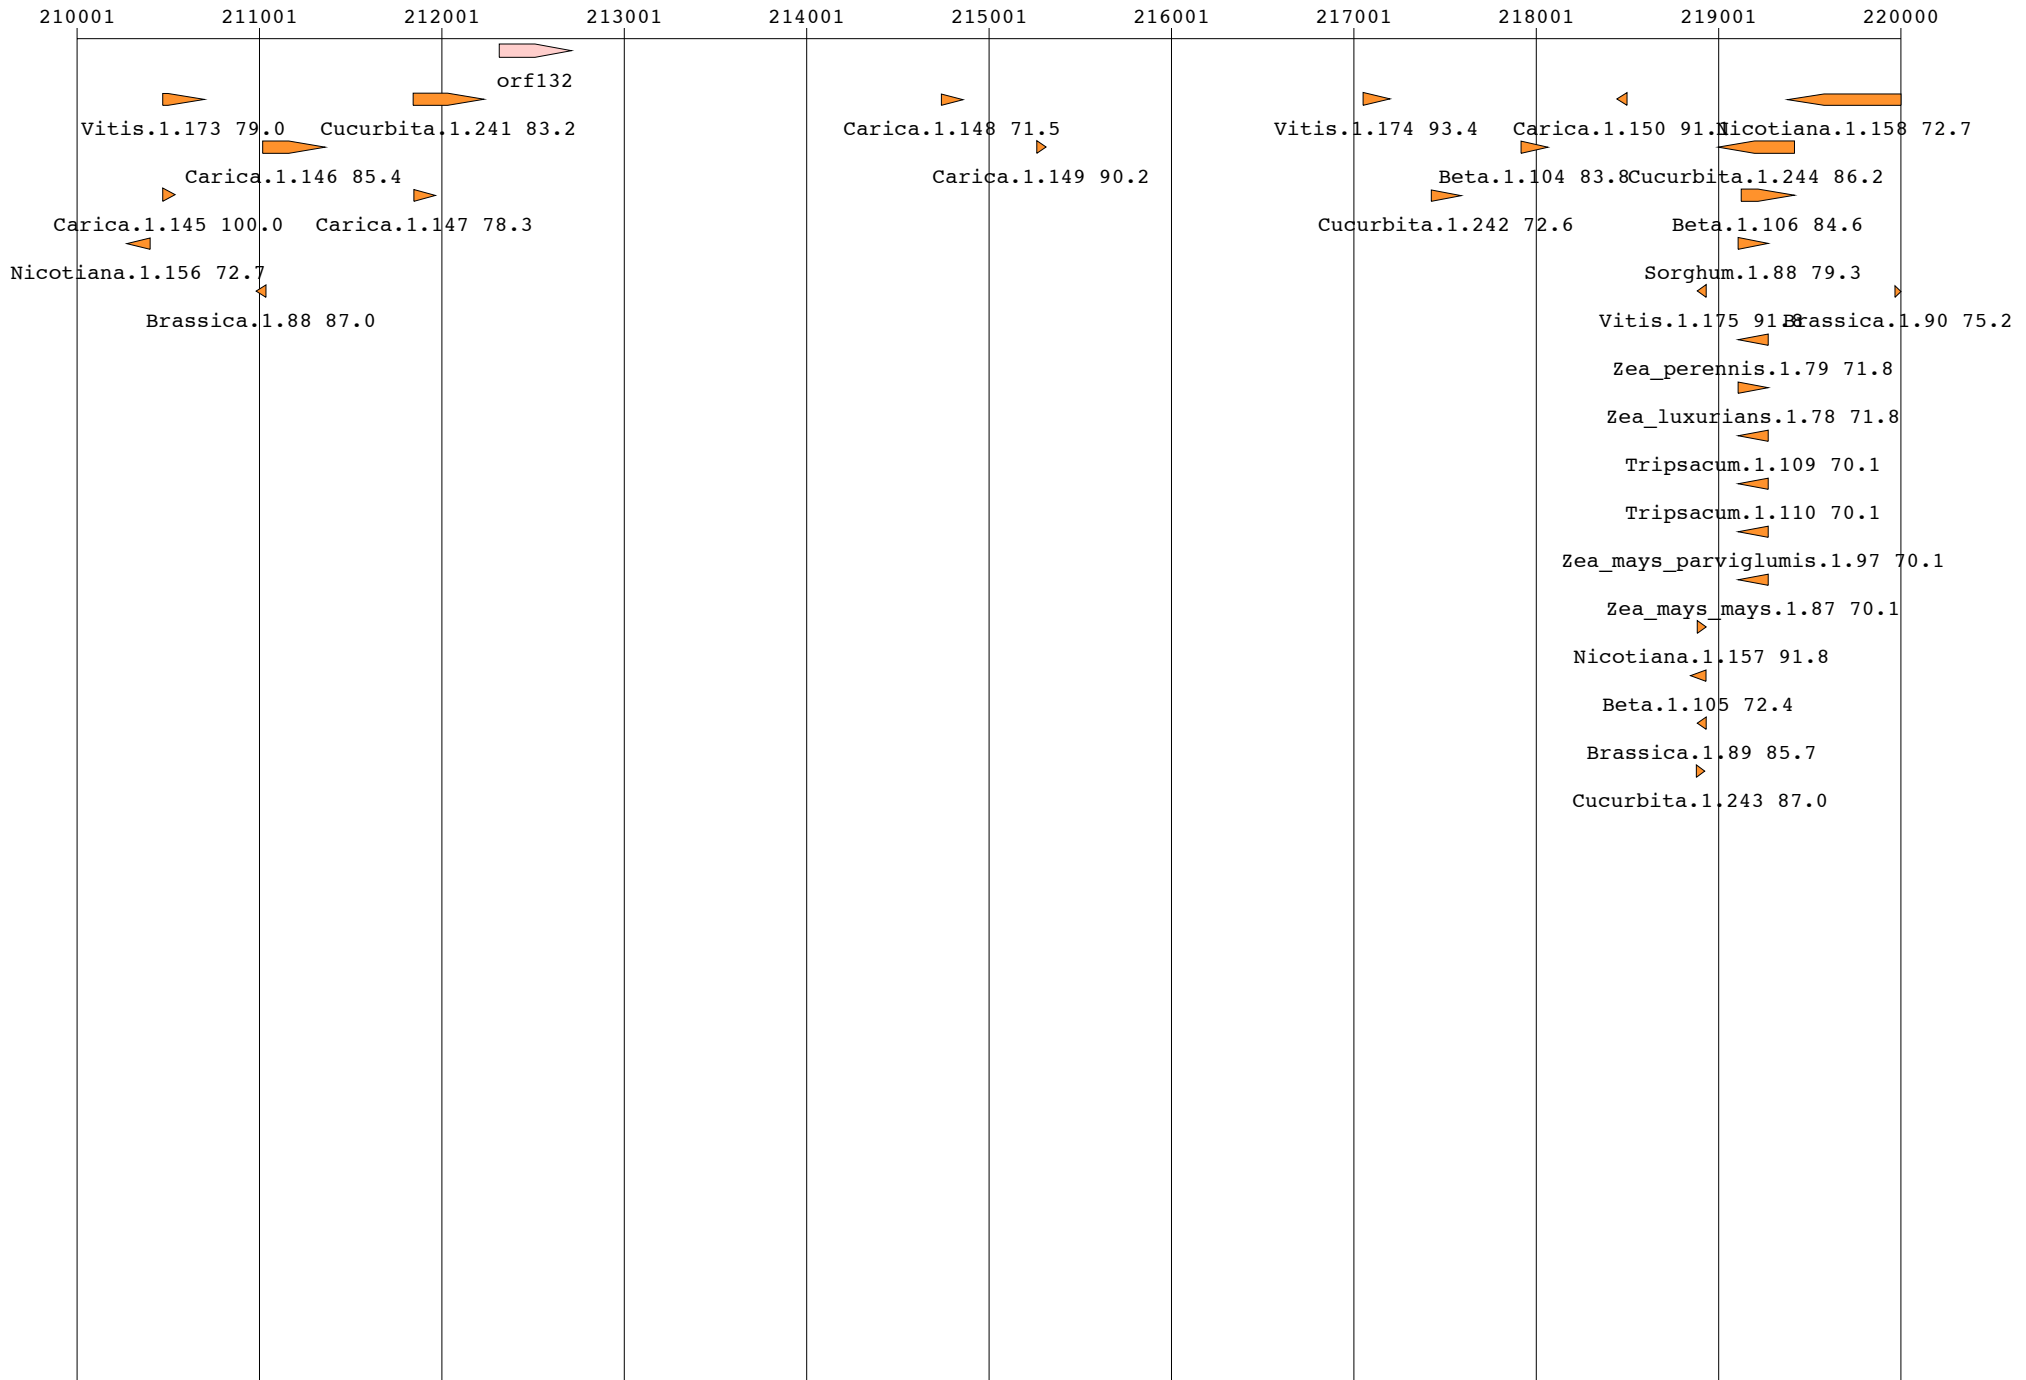

sequence: Citrullus length: 379236

220001 221001 222001 223001 224001 225001 226001 227001 228001 229001 230000

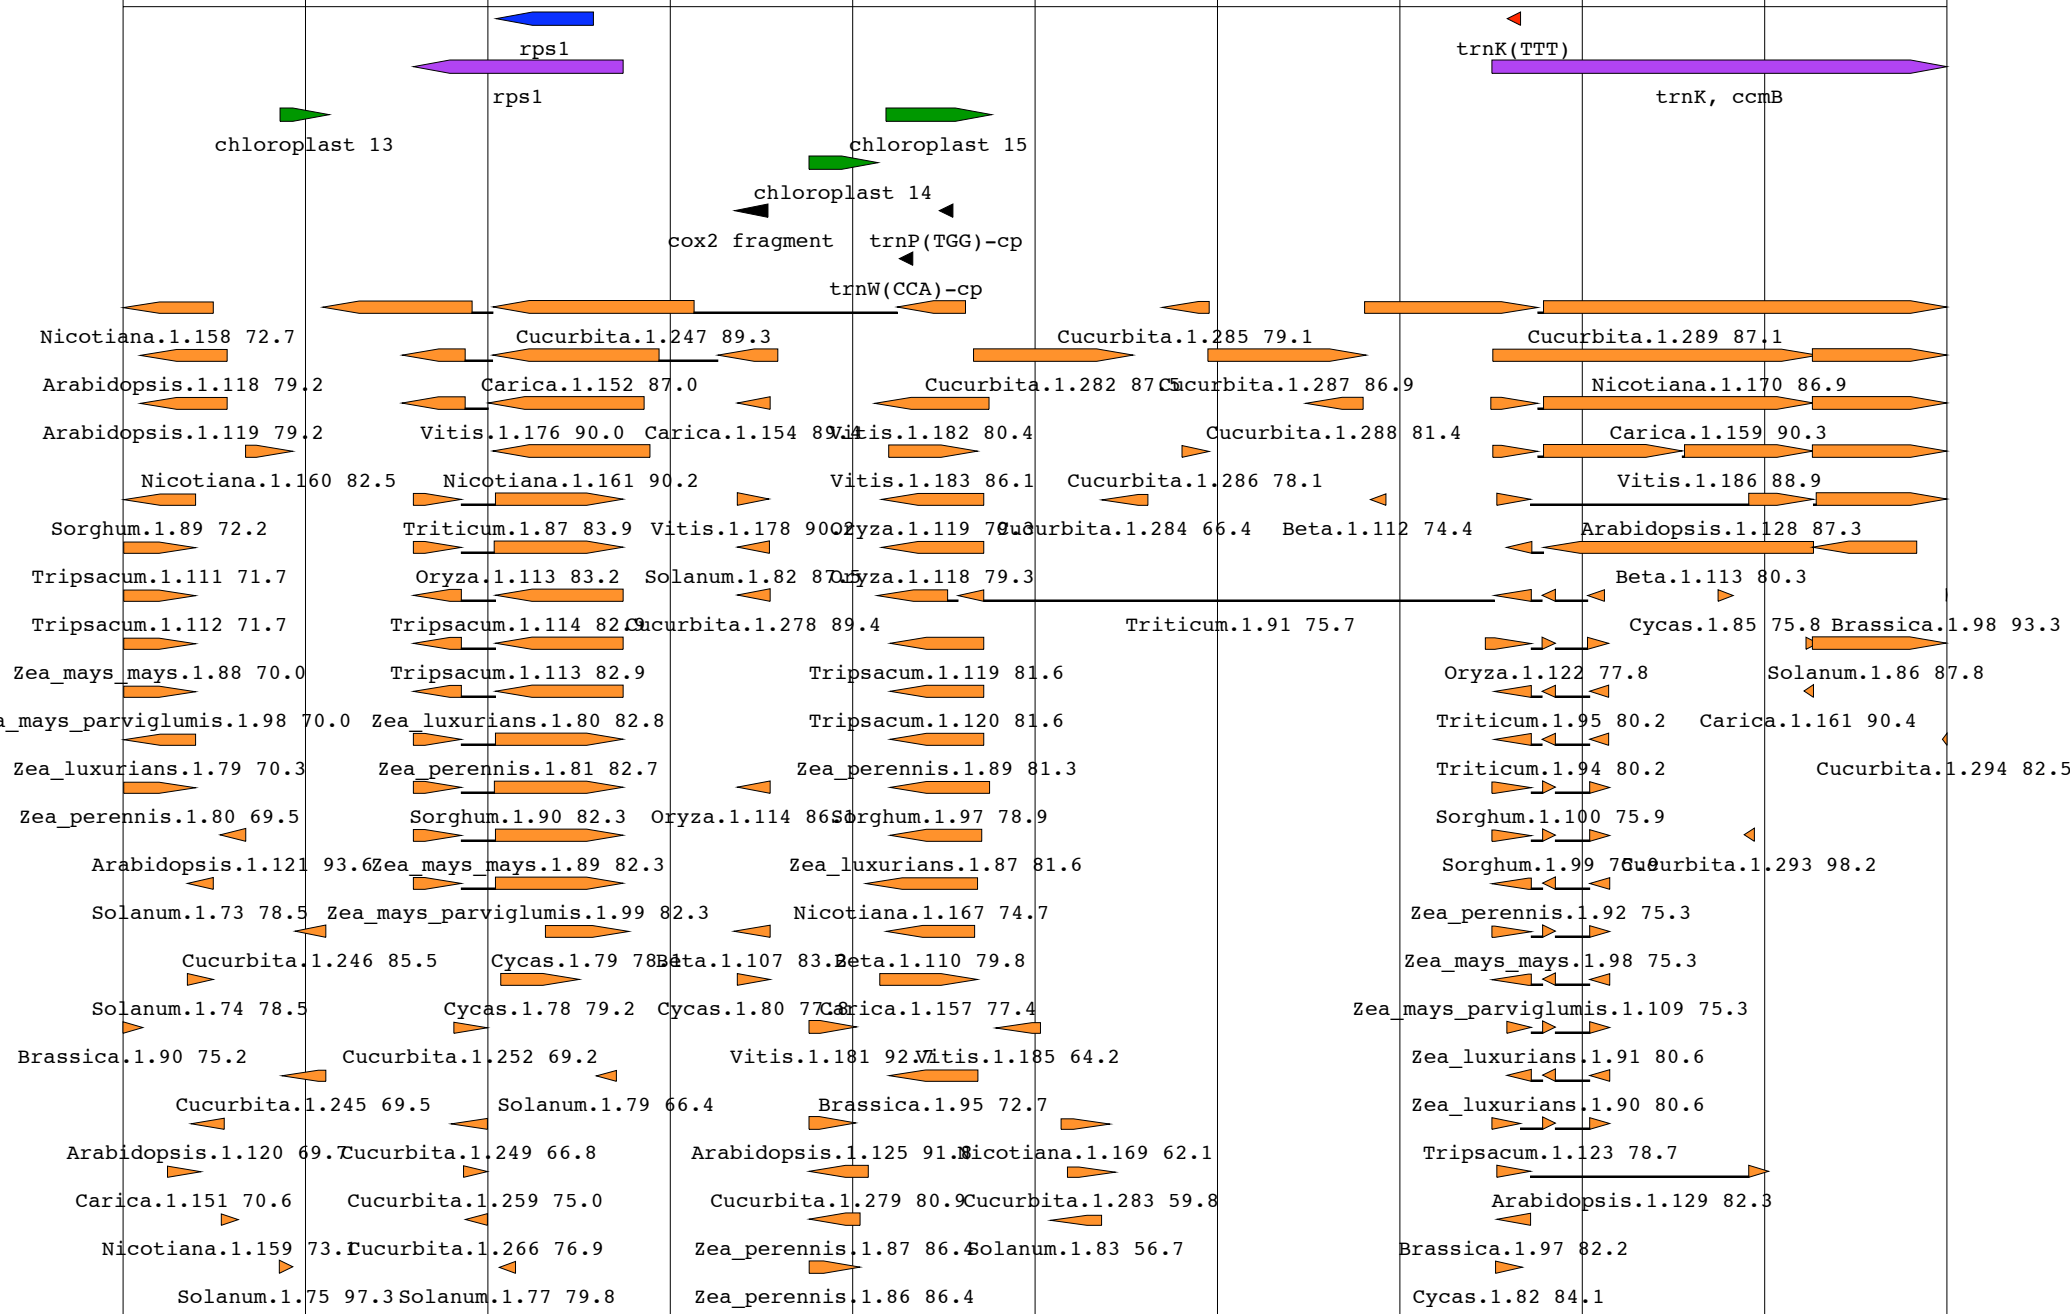

sequence: Citrullus length: 379236

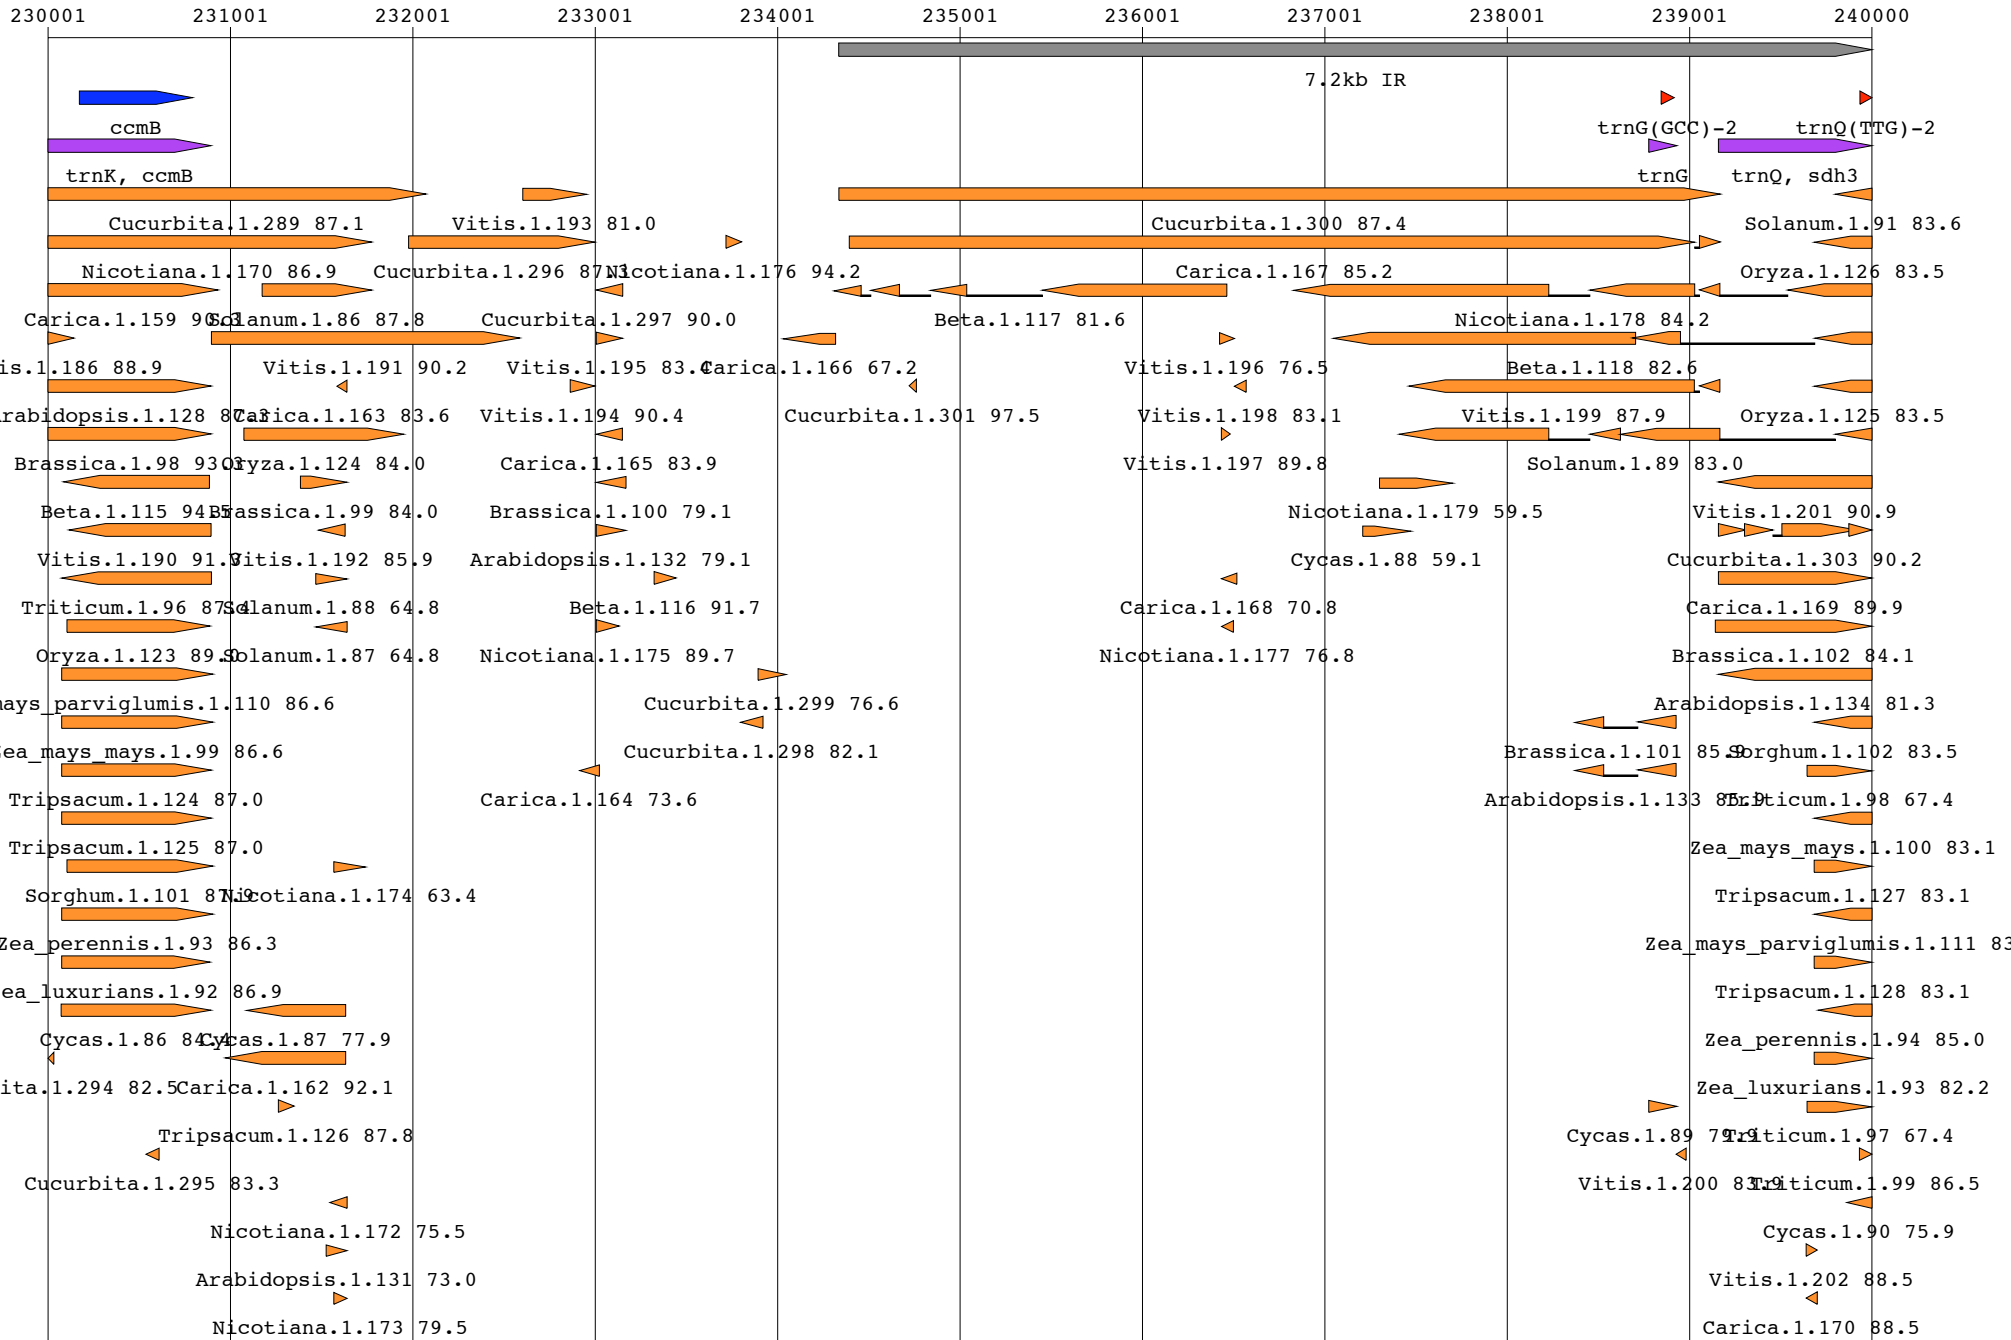





sequence: Citrullus length: 379236

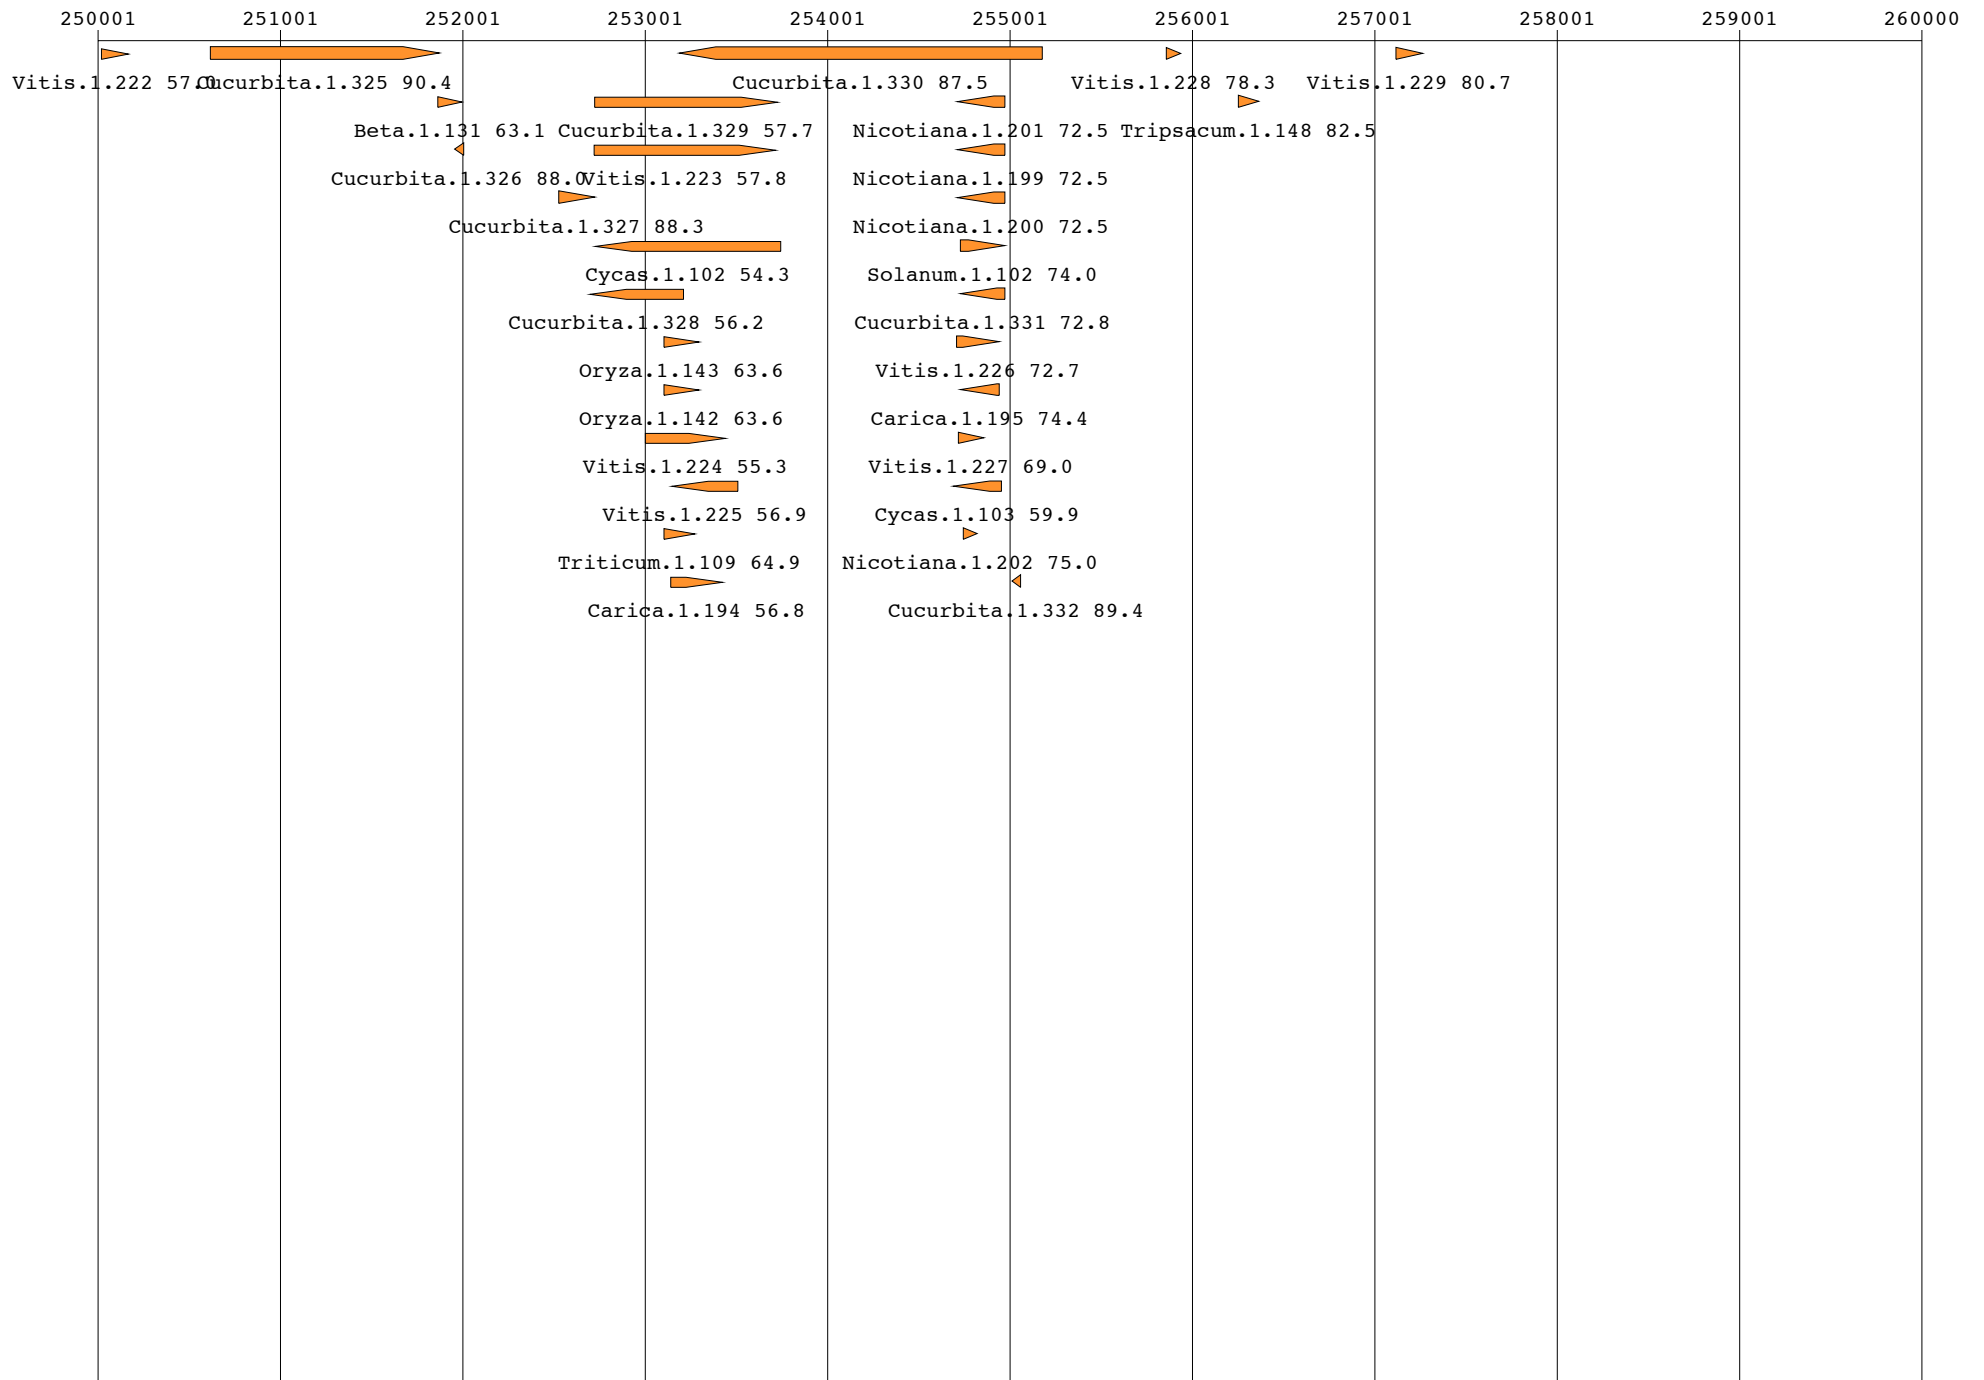

sequence: Citrullus length: 379236

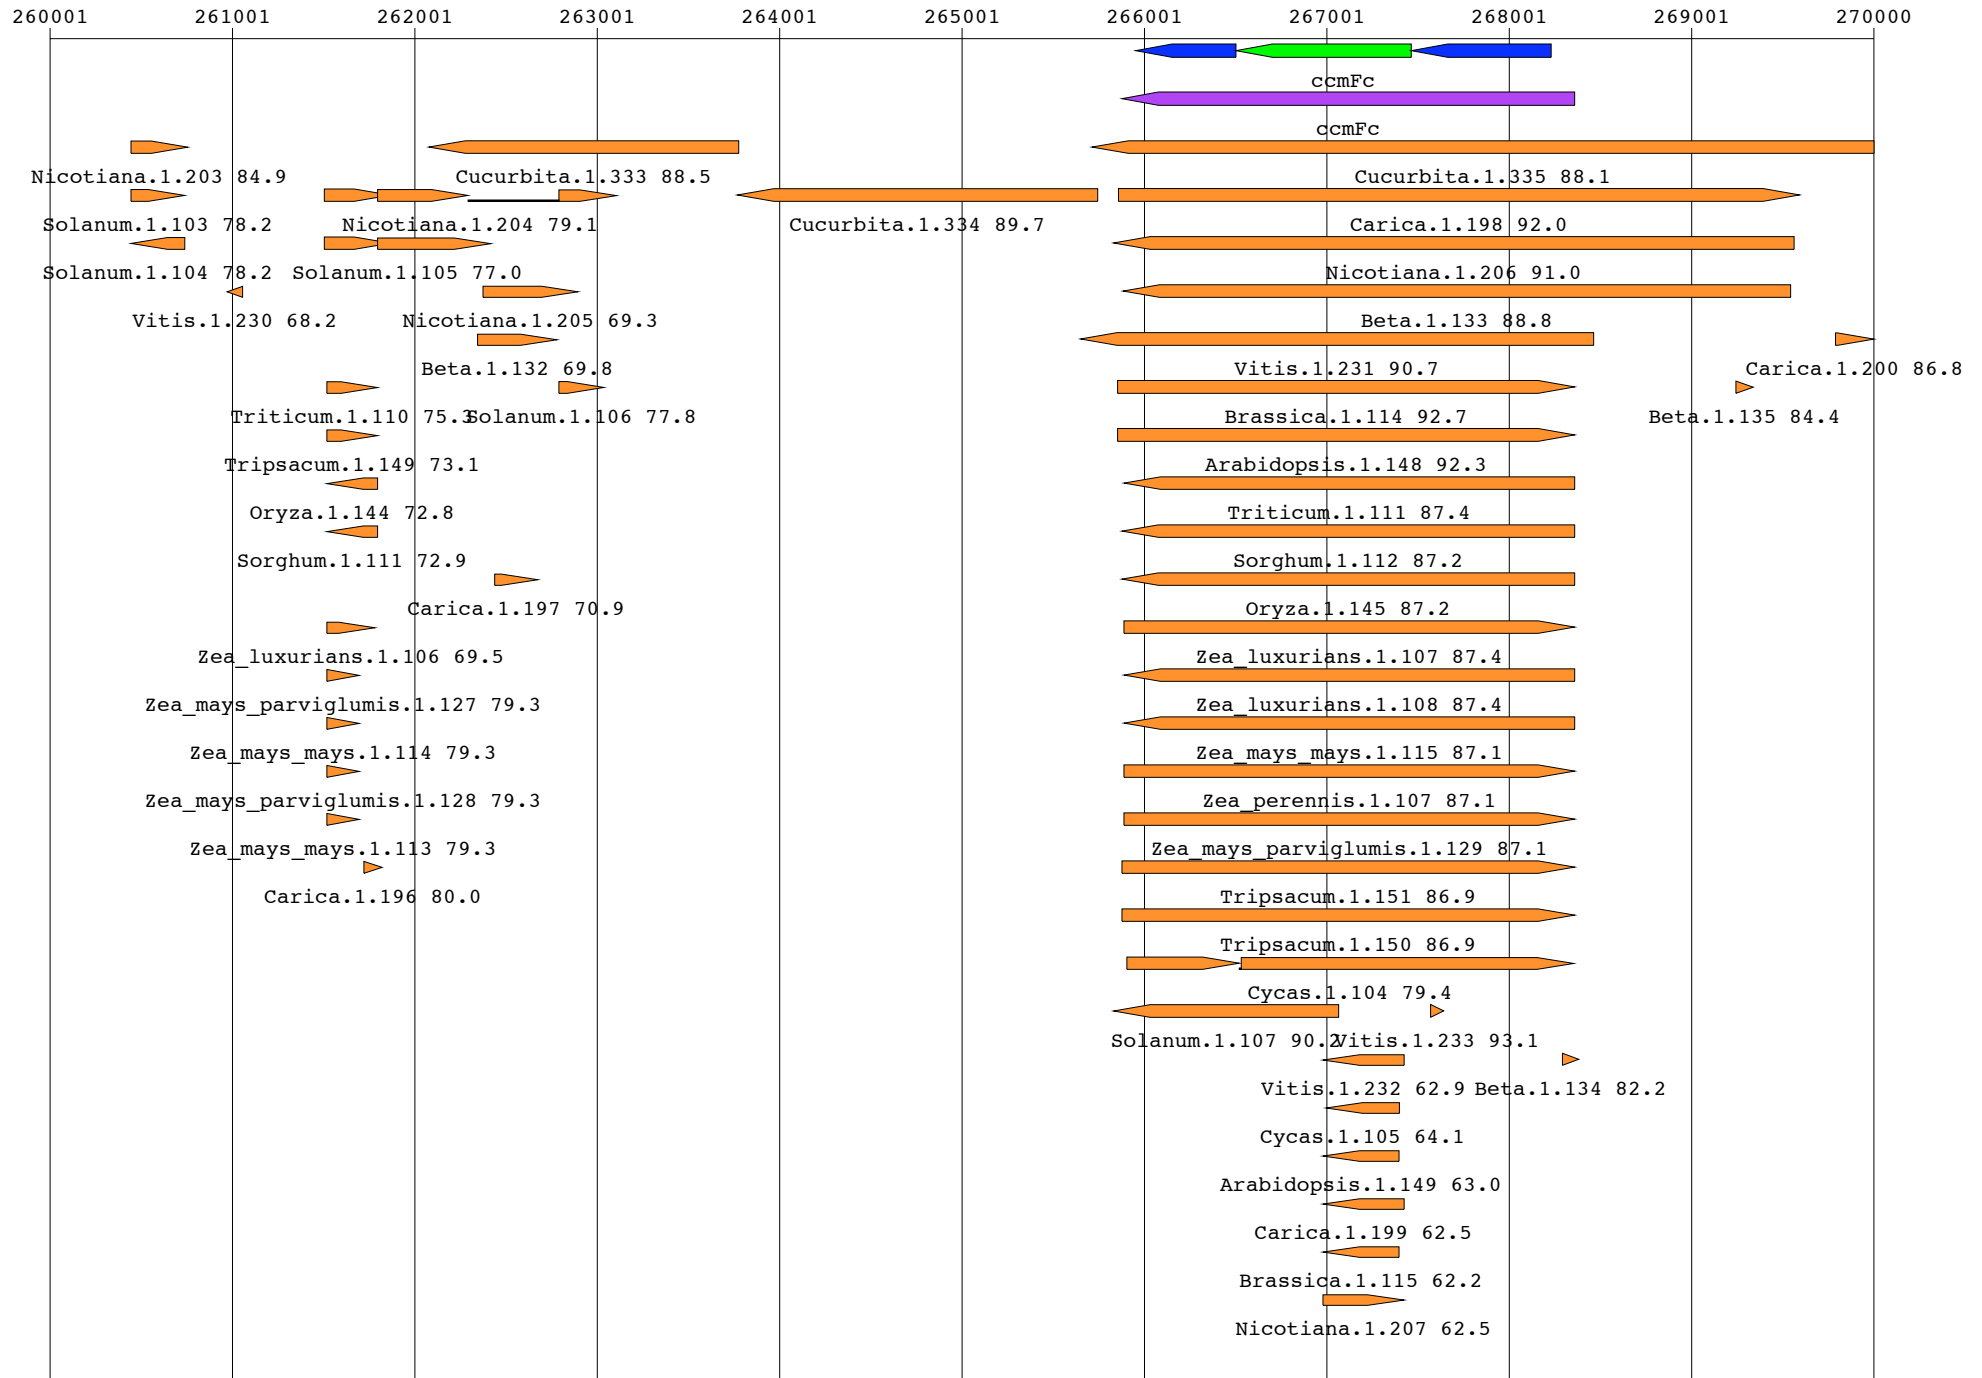

sequence: Citrullus length: 379236

270001 271001 272001 273001 274001 275001 276001 277001 278001 279001 280000

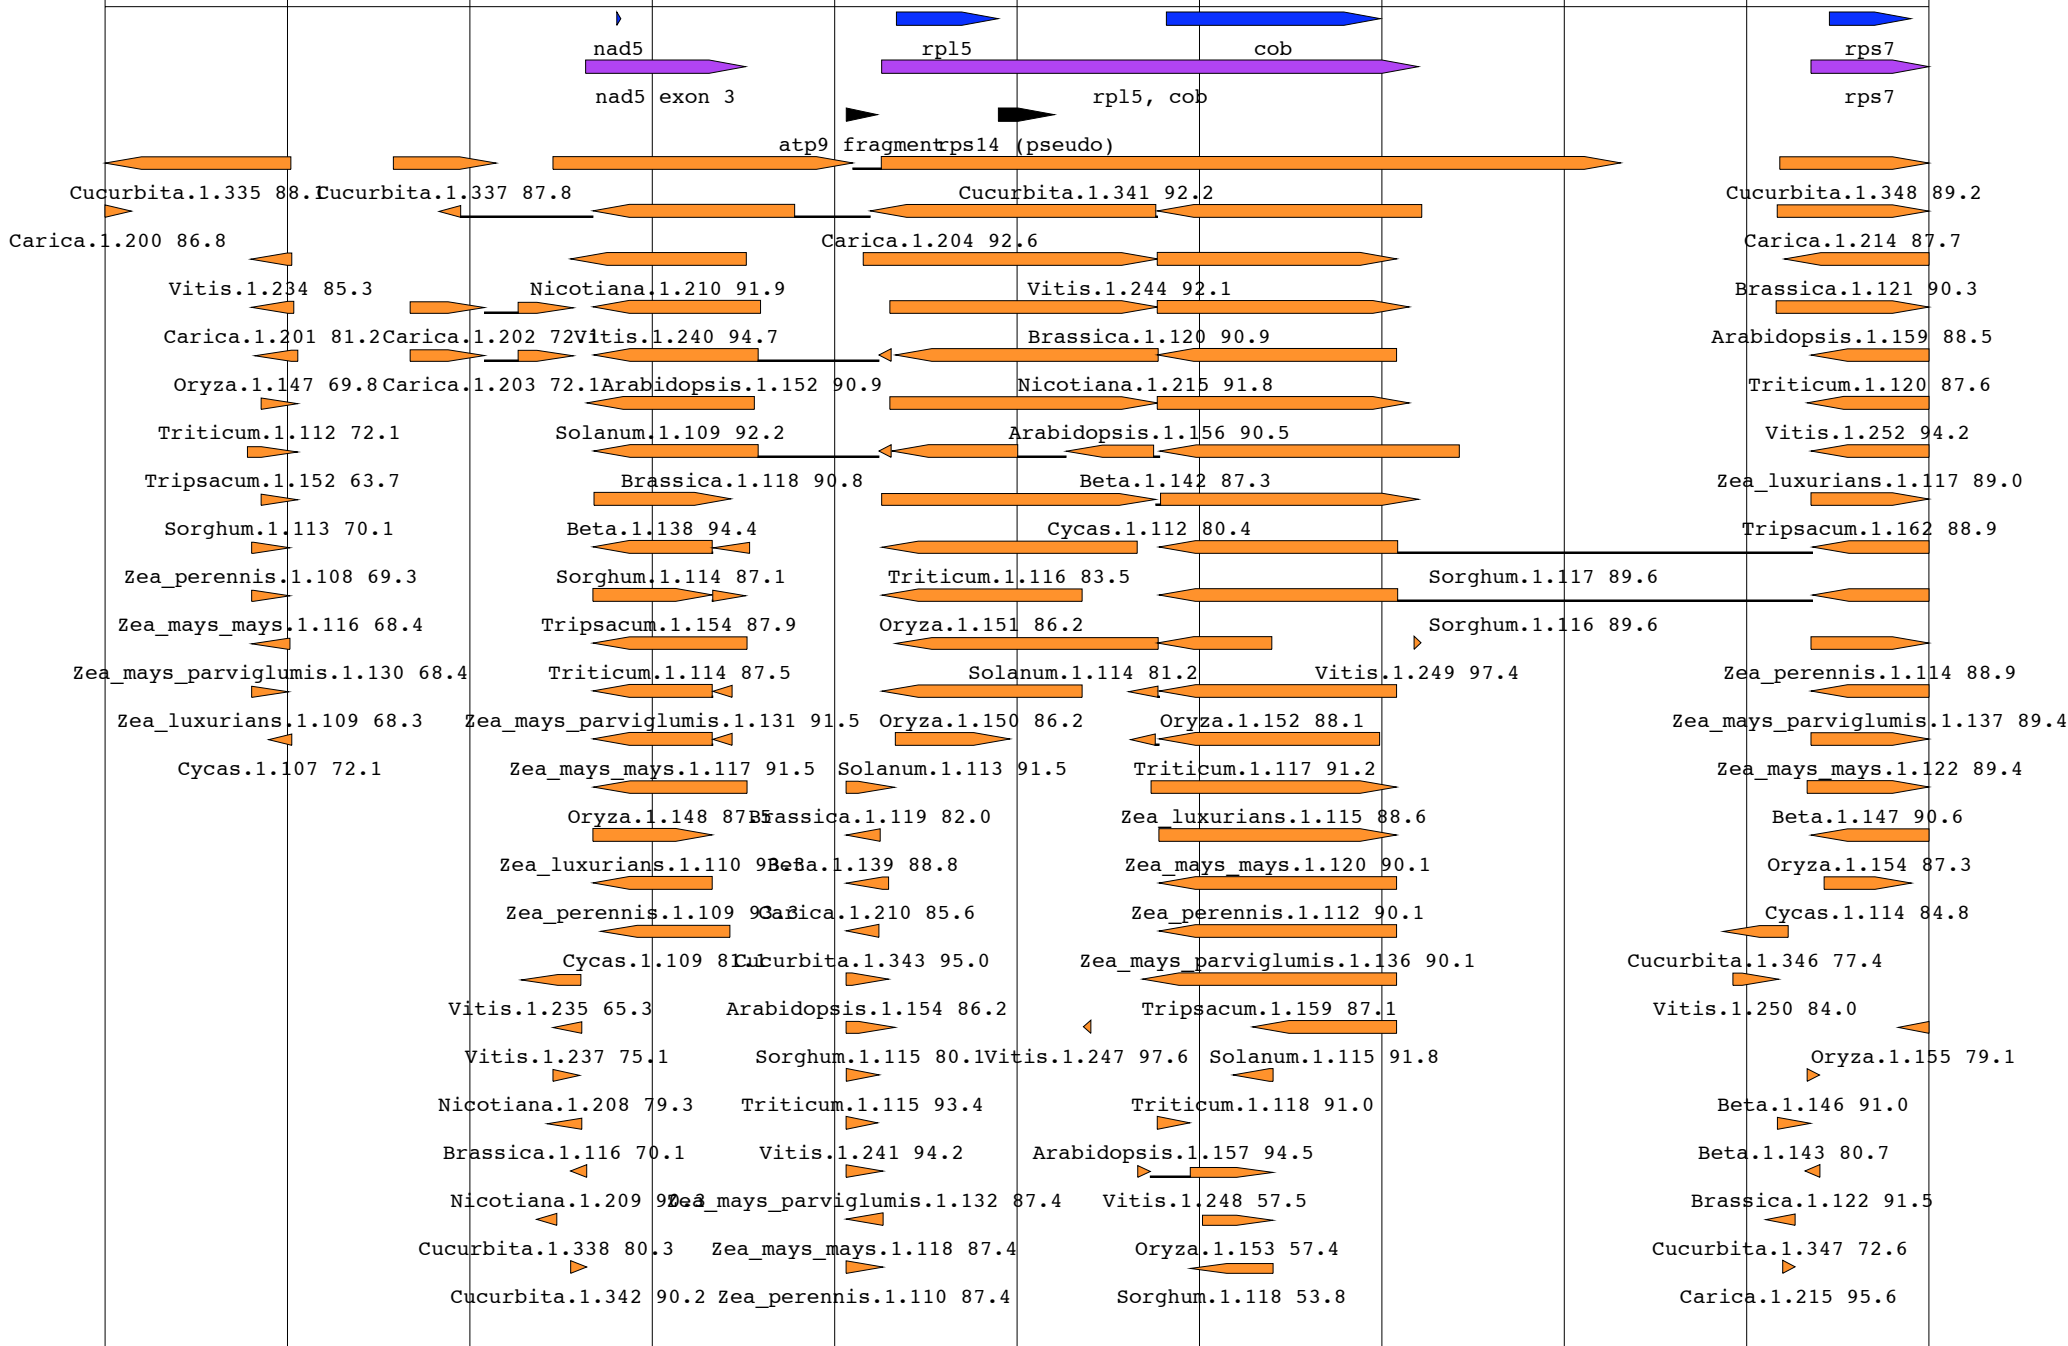

sequence: Citrullus length: 379236

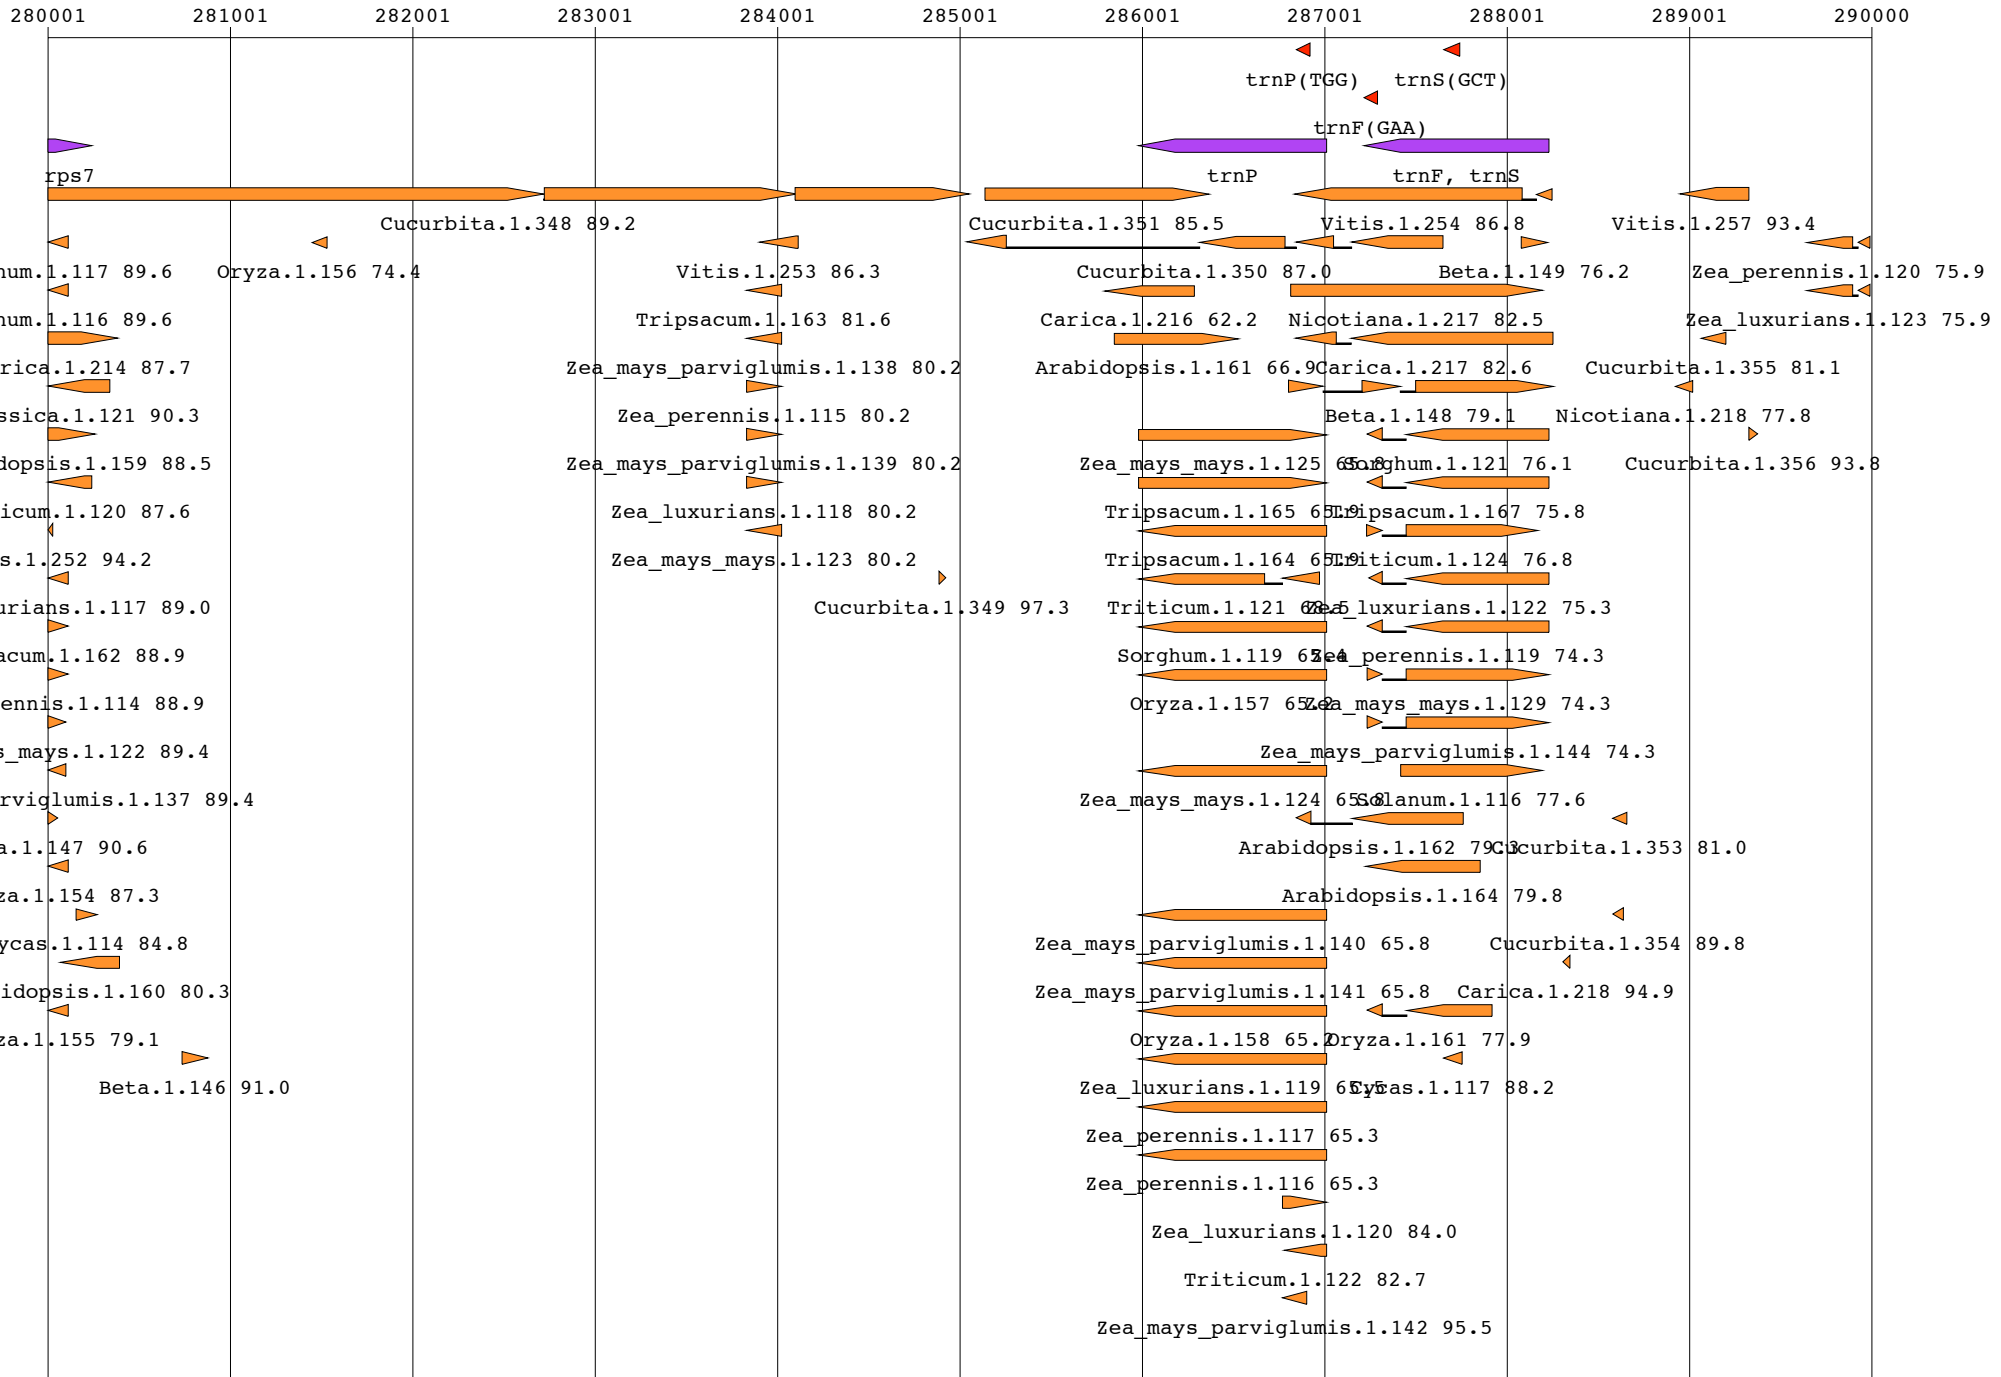

sequence: Citrullus length: 379236

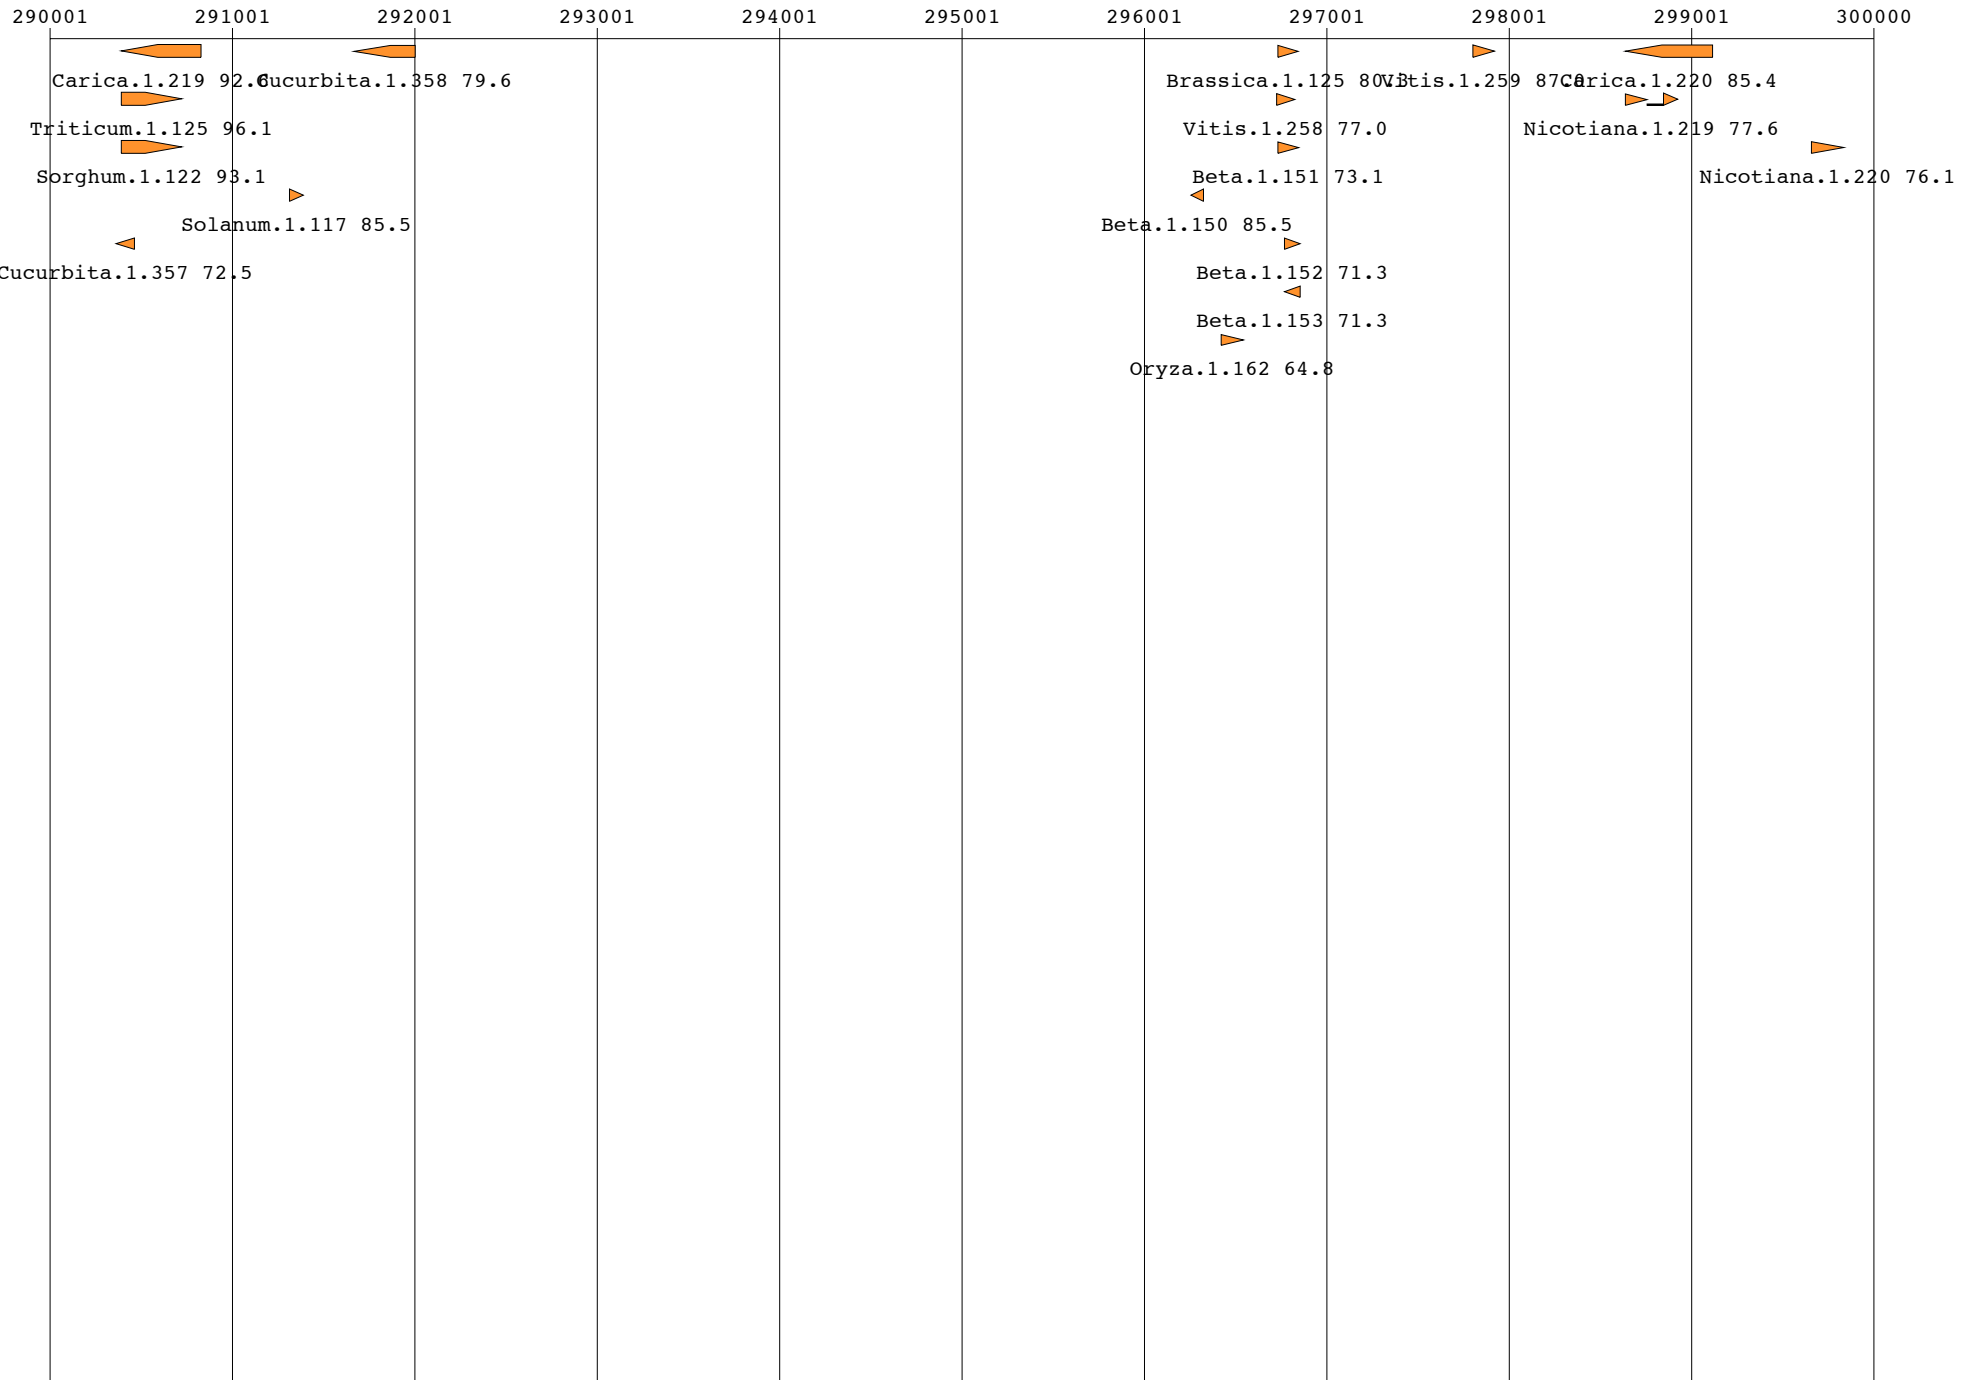

sequence: Citrullus length: 379236

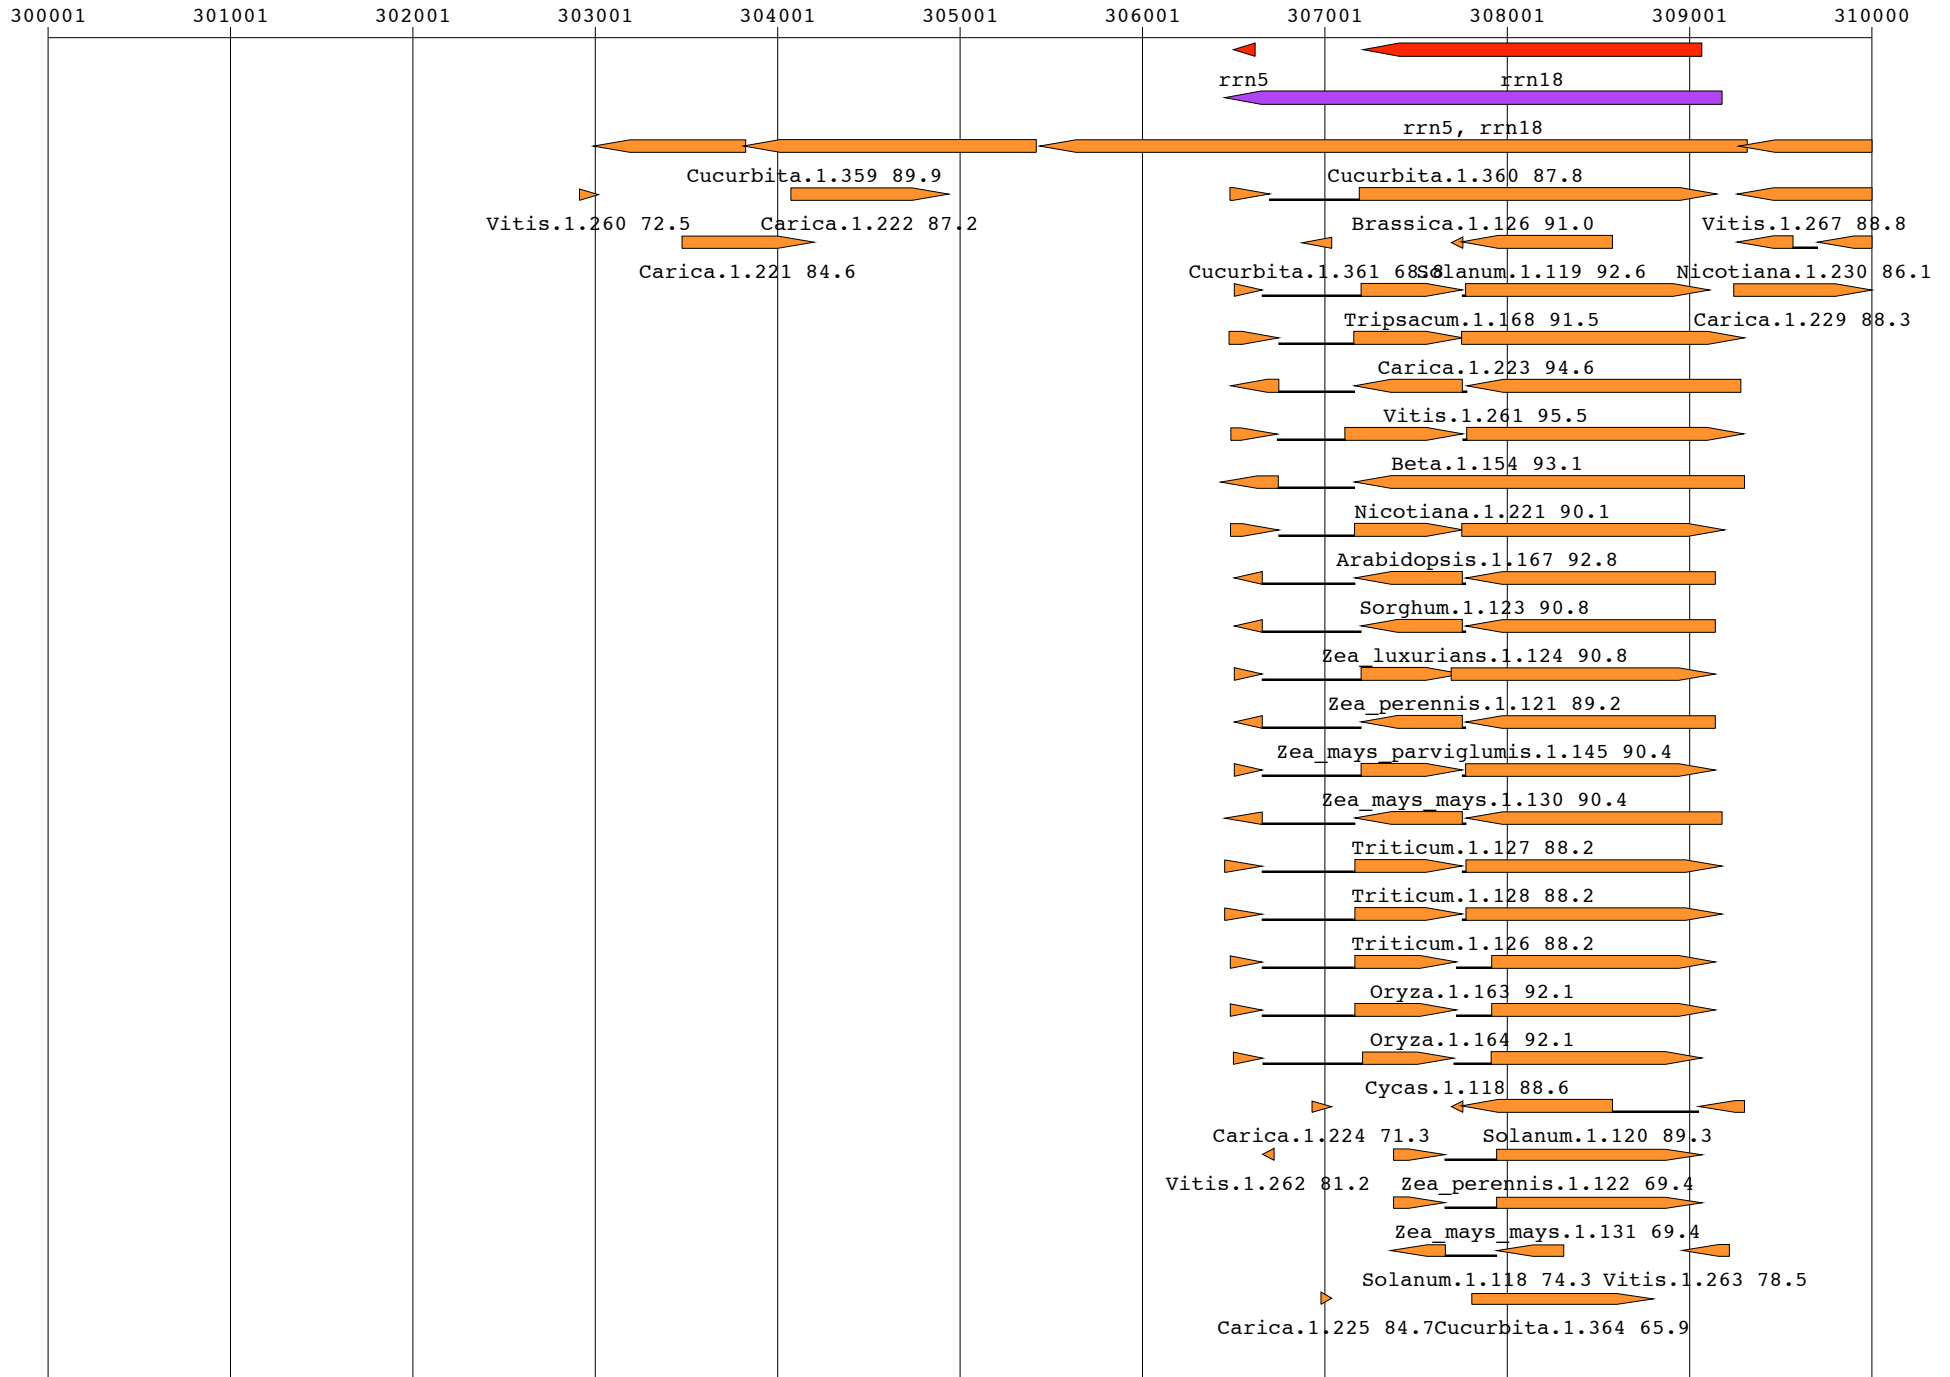

sequence: Citrullus length: 379236

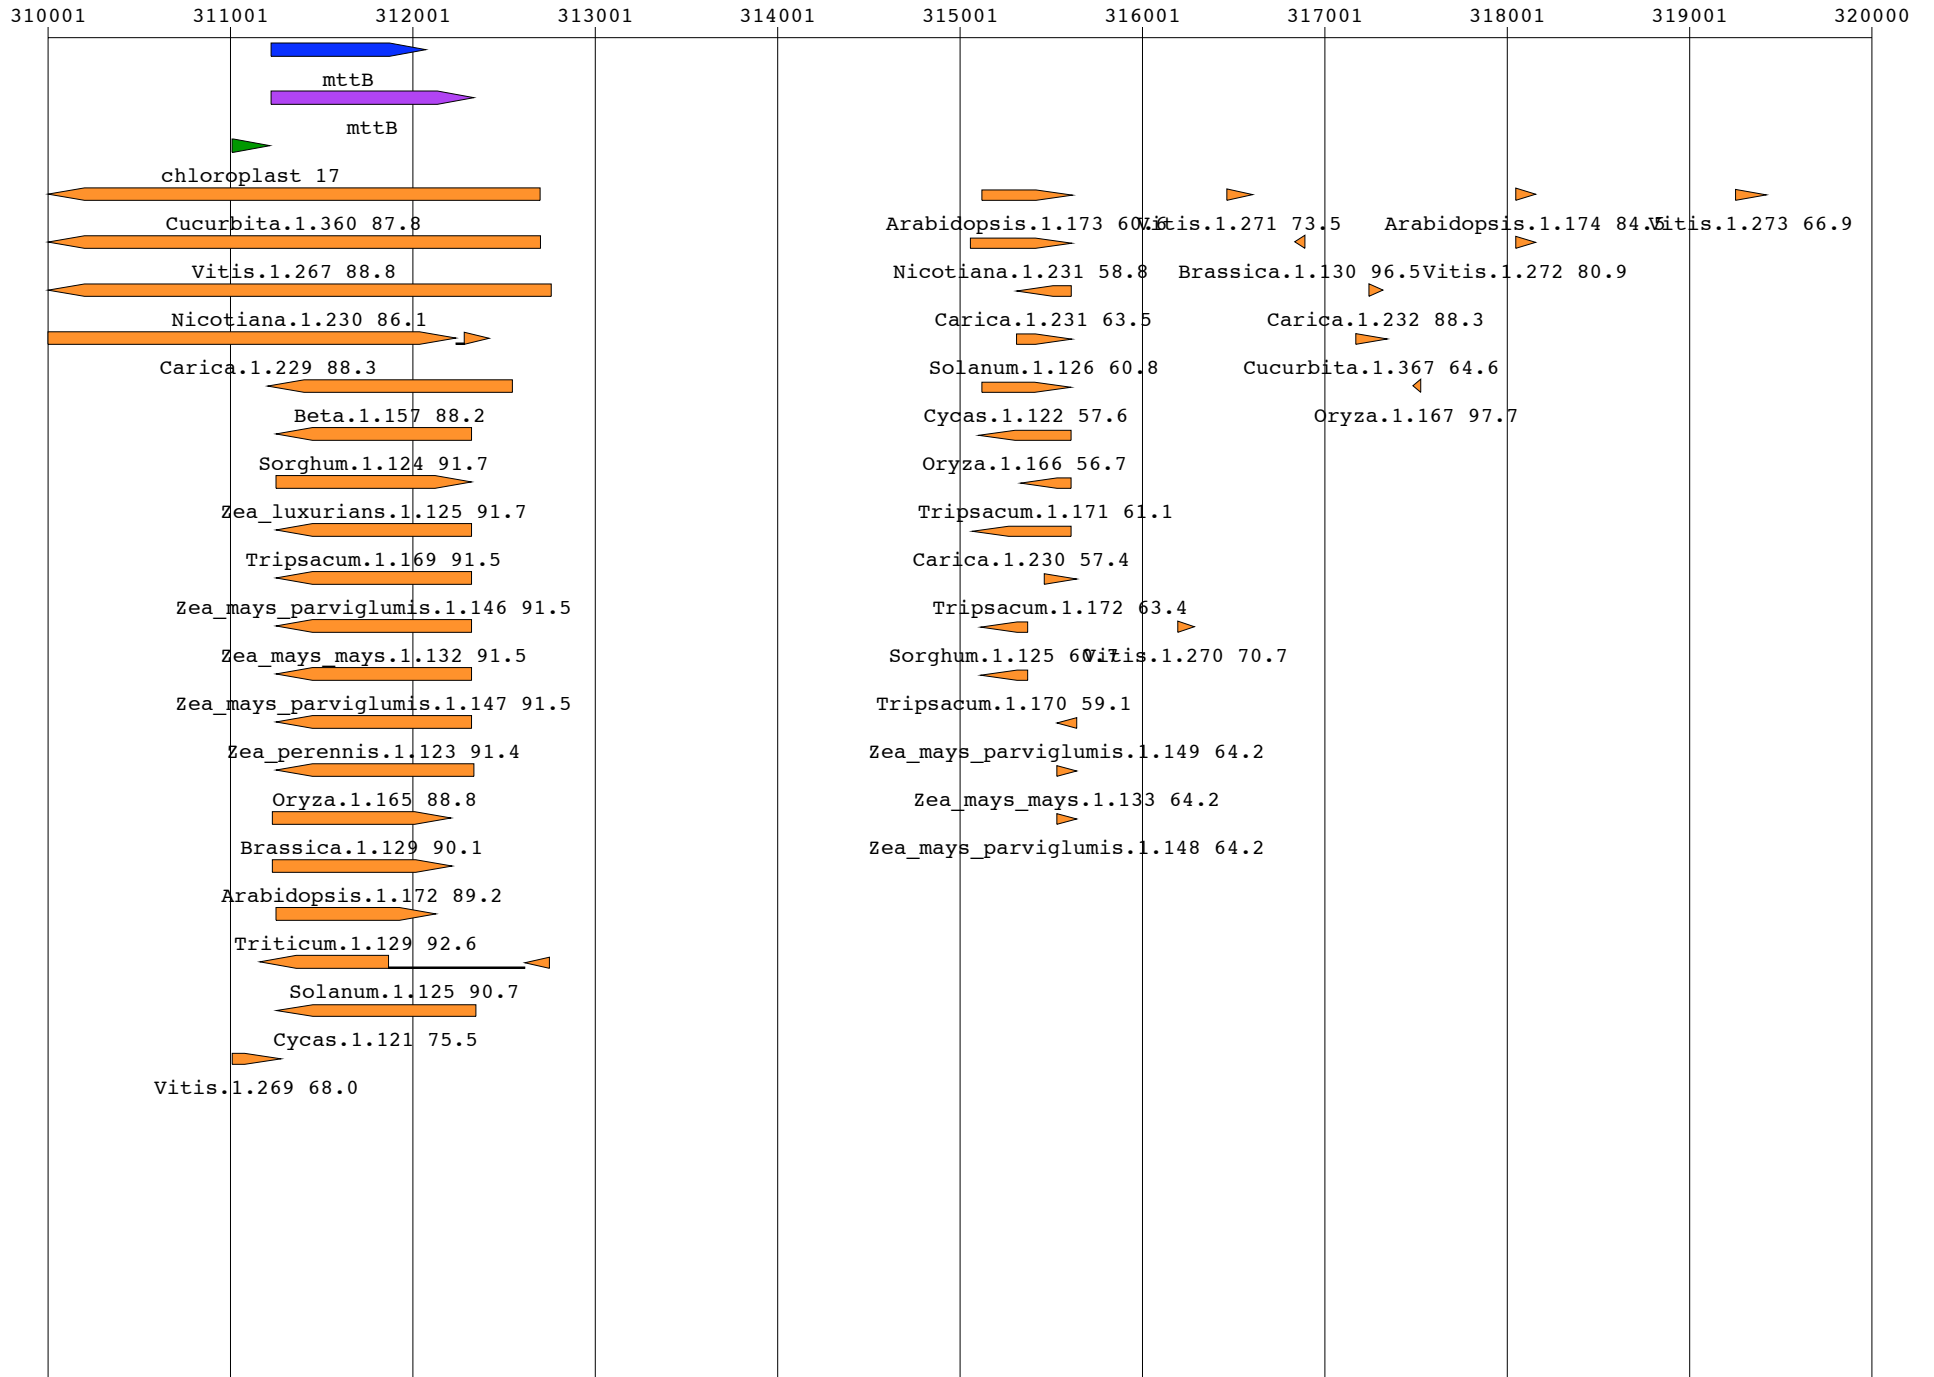



sequence: Citrullus length: 379236

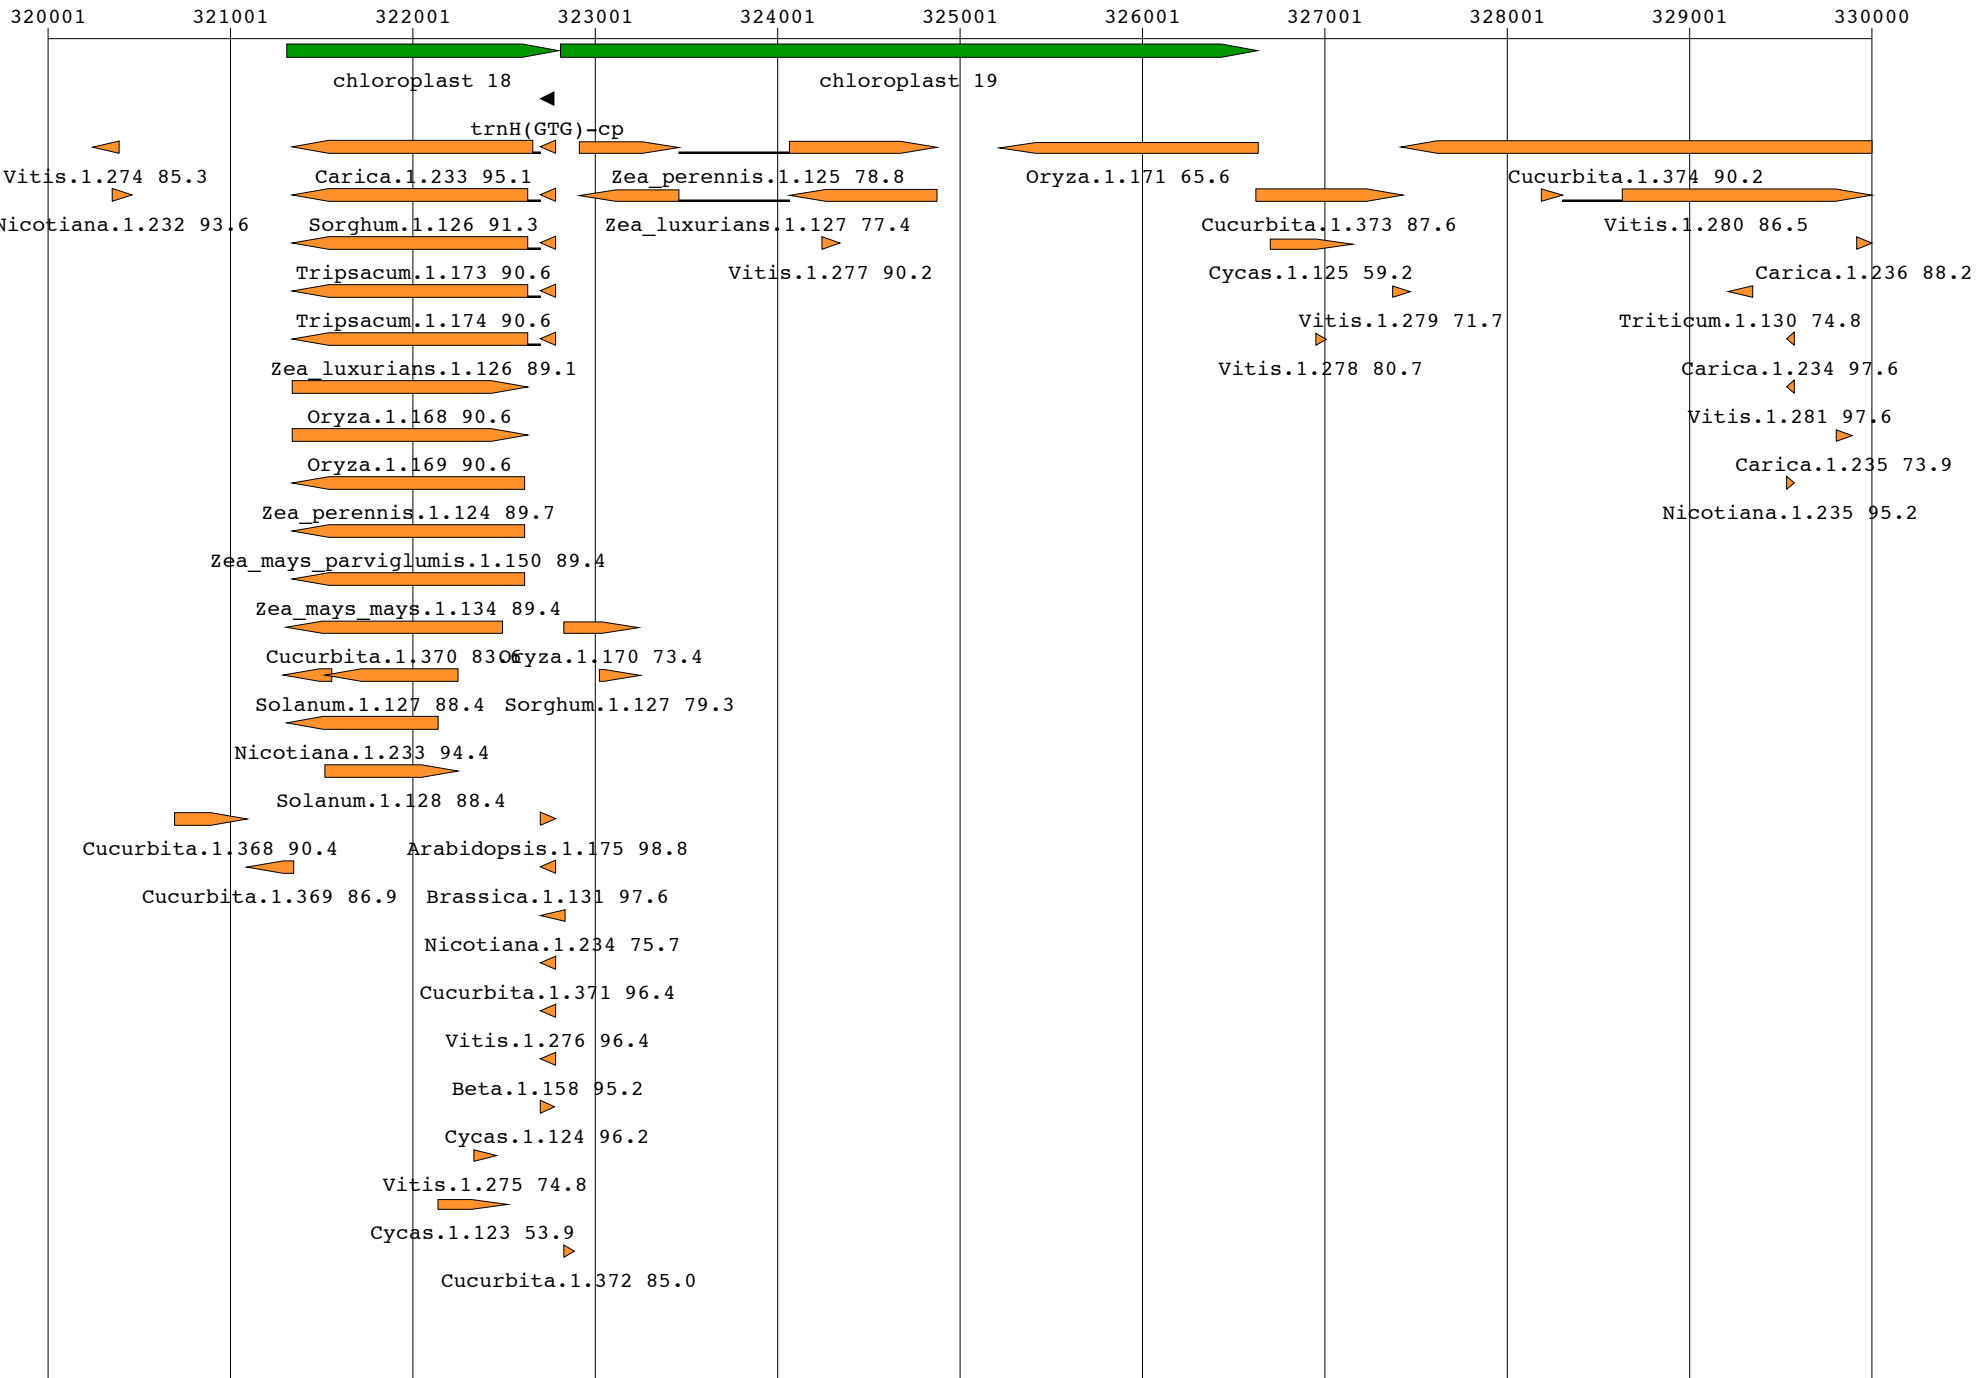

sequence: Citrullus length: 379236

330001 331001 332001 333001 334001 335001 336001 337001 338001 339001 340000

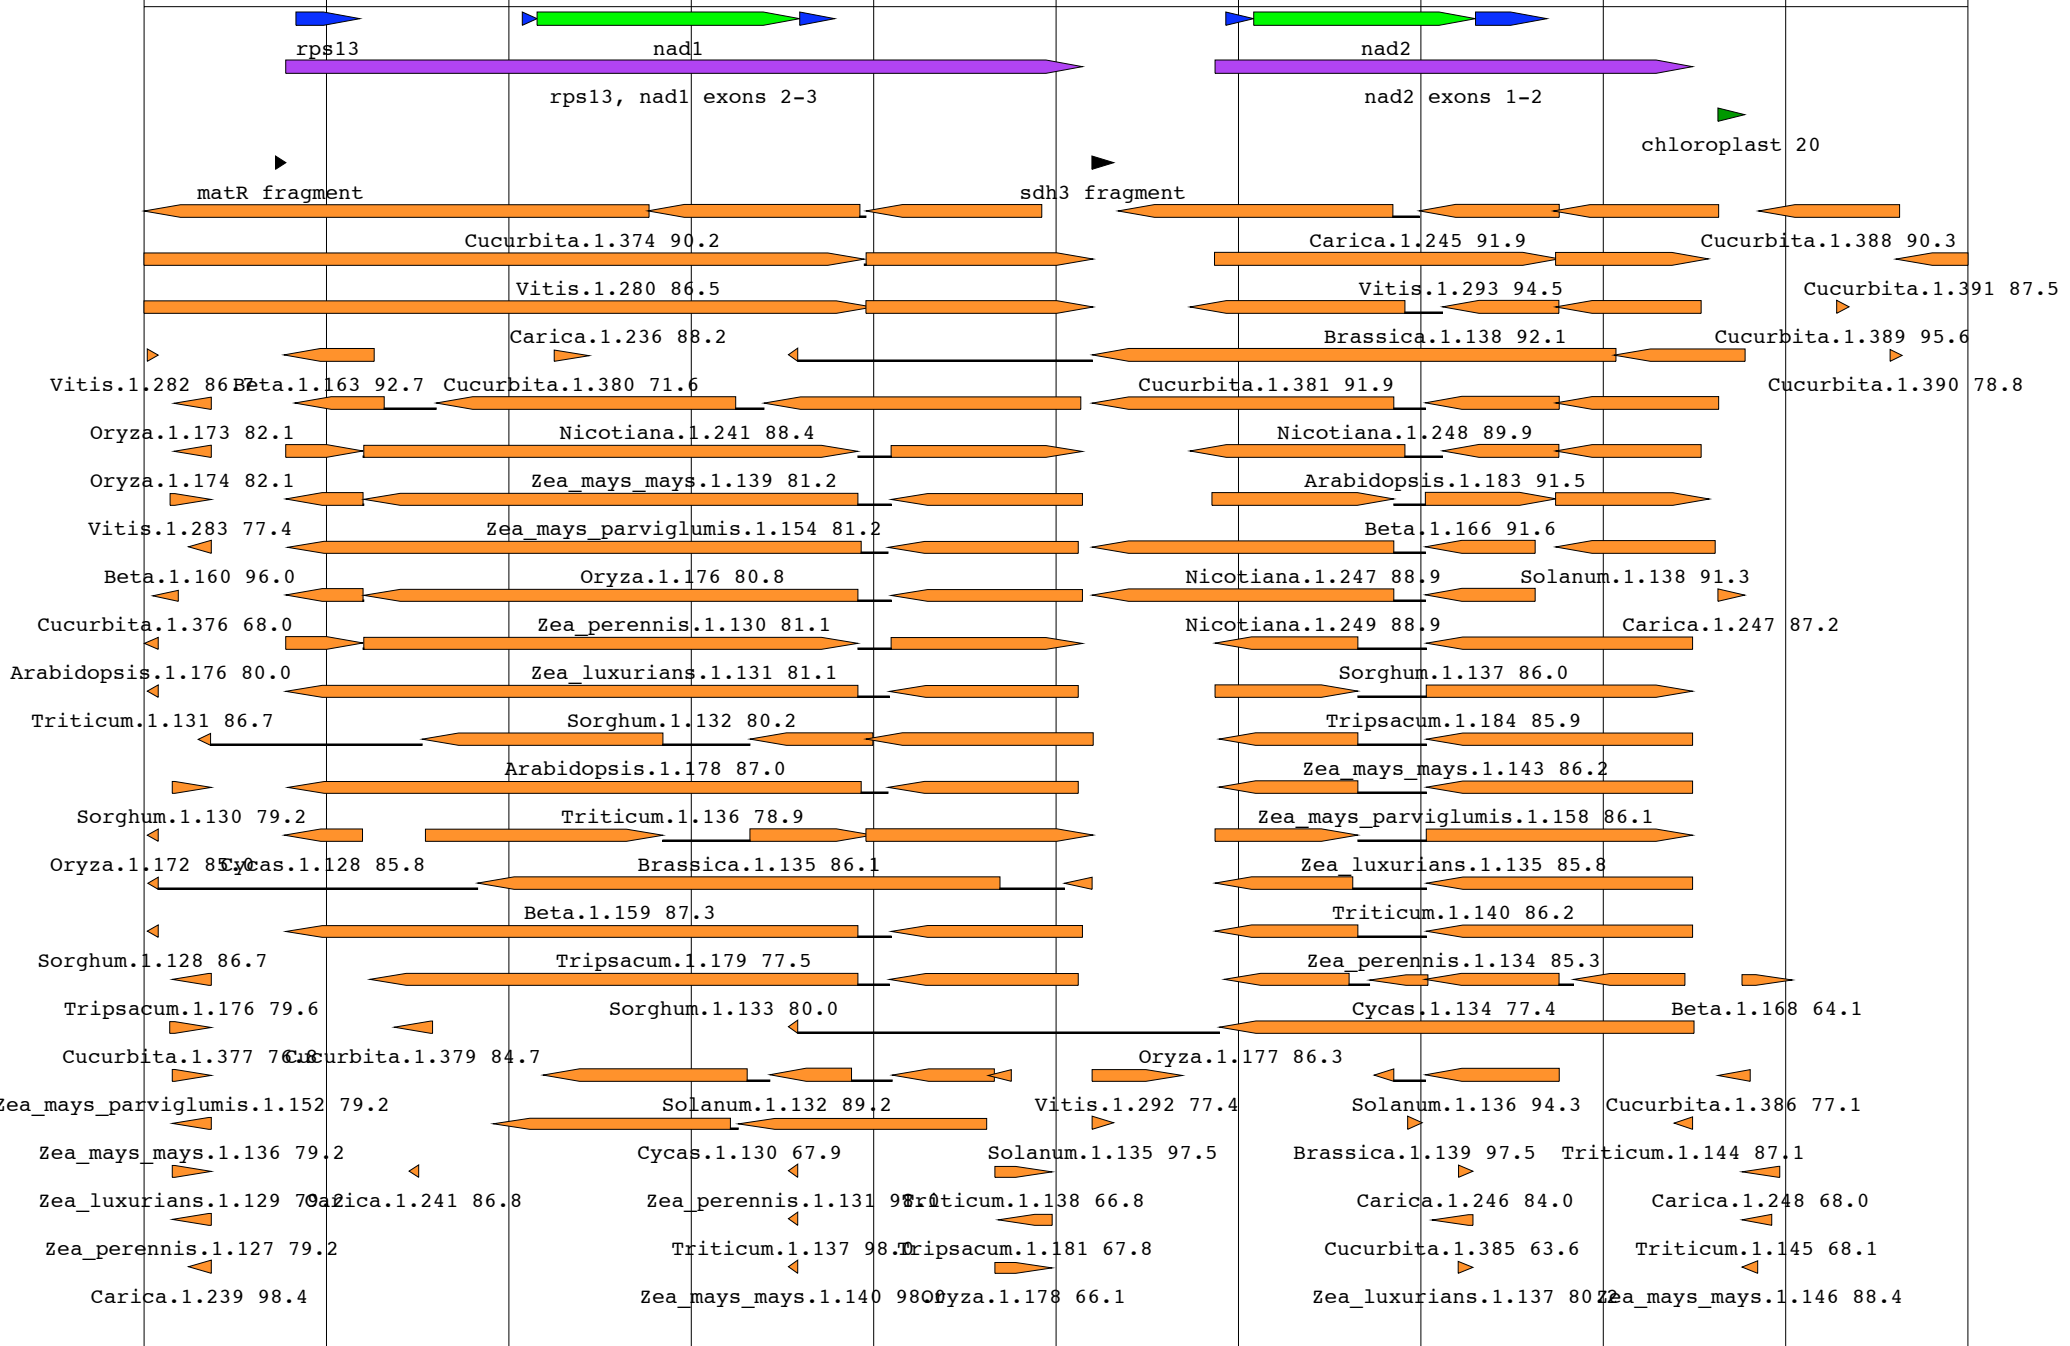

sequence: Citrullus length: 379236

340001 341001 342001 343001 344001 345001 346001 347001 348001 349001 350000

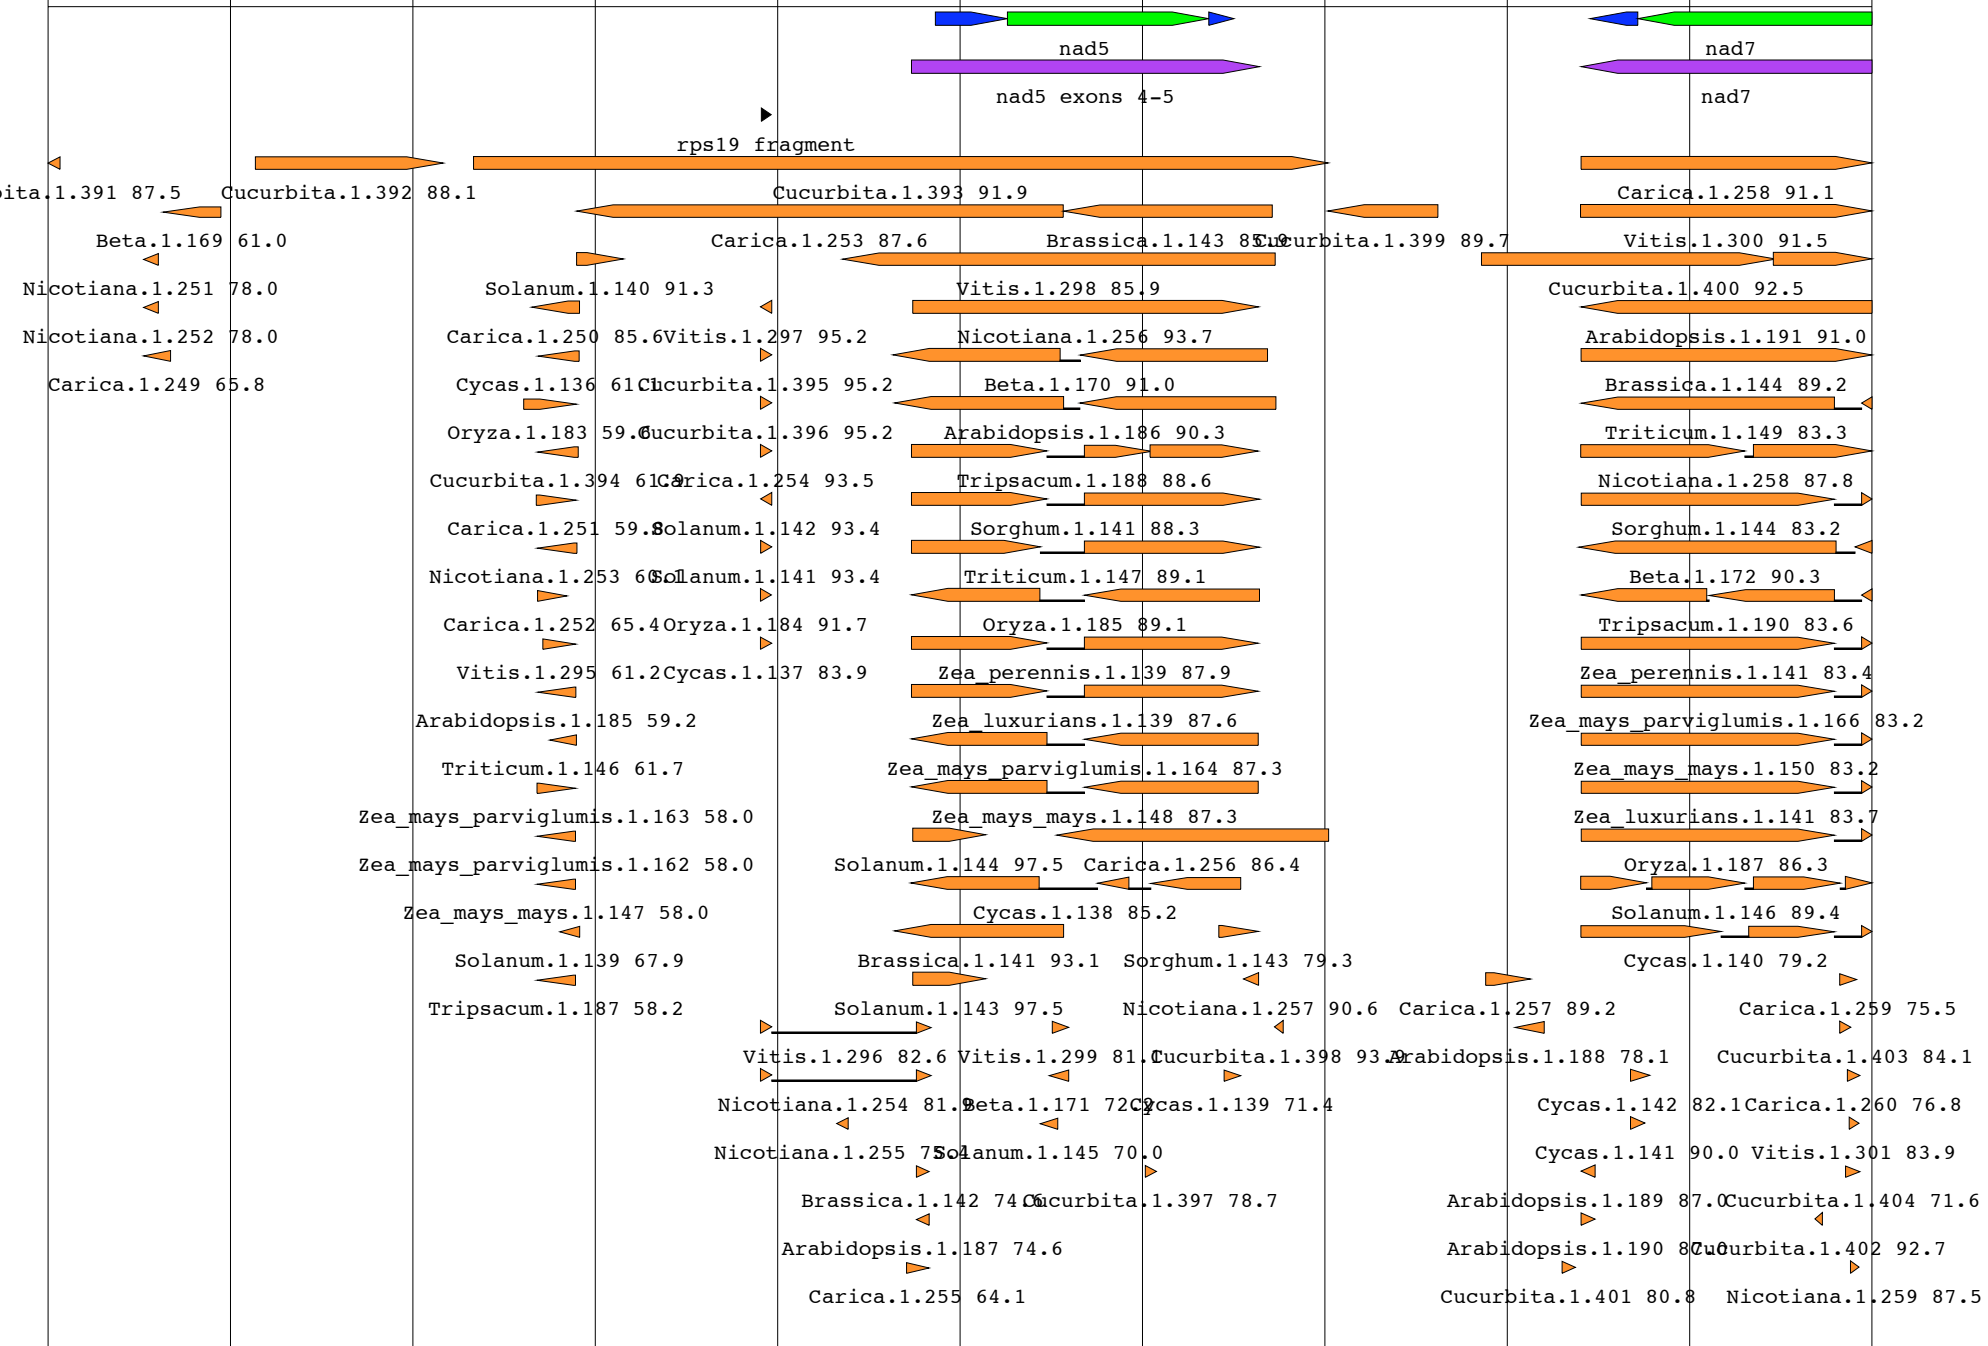

sequence: Citrullus length: 379236

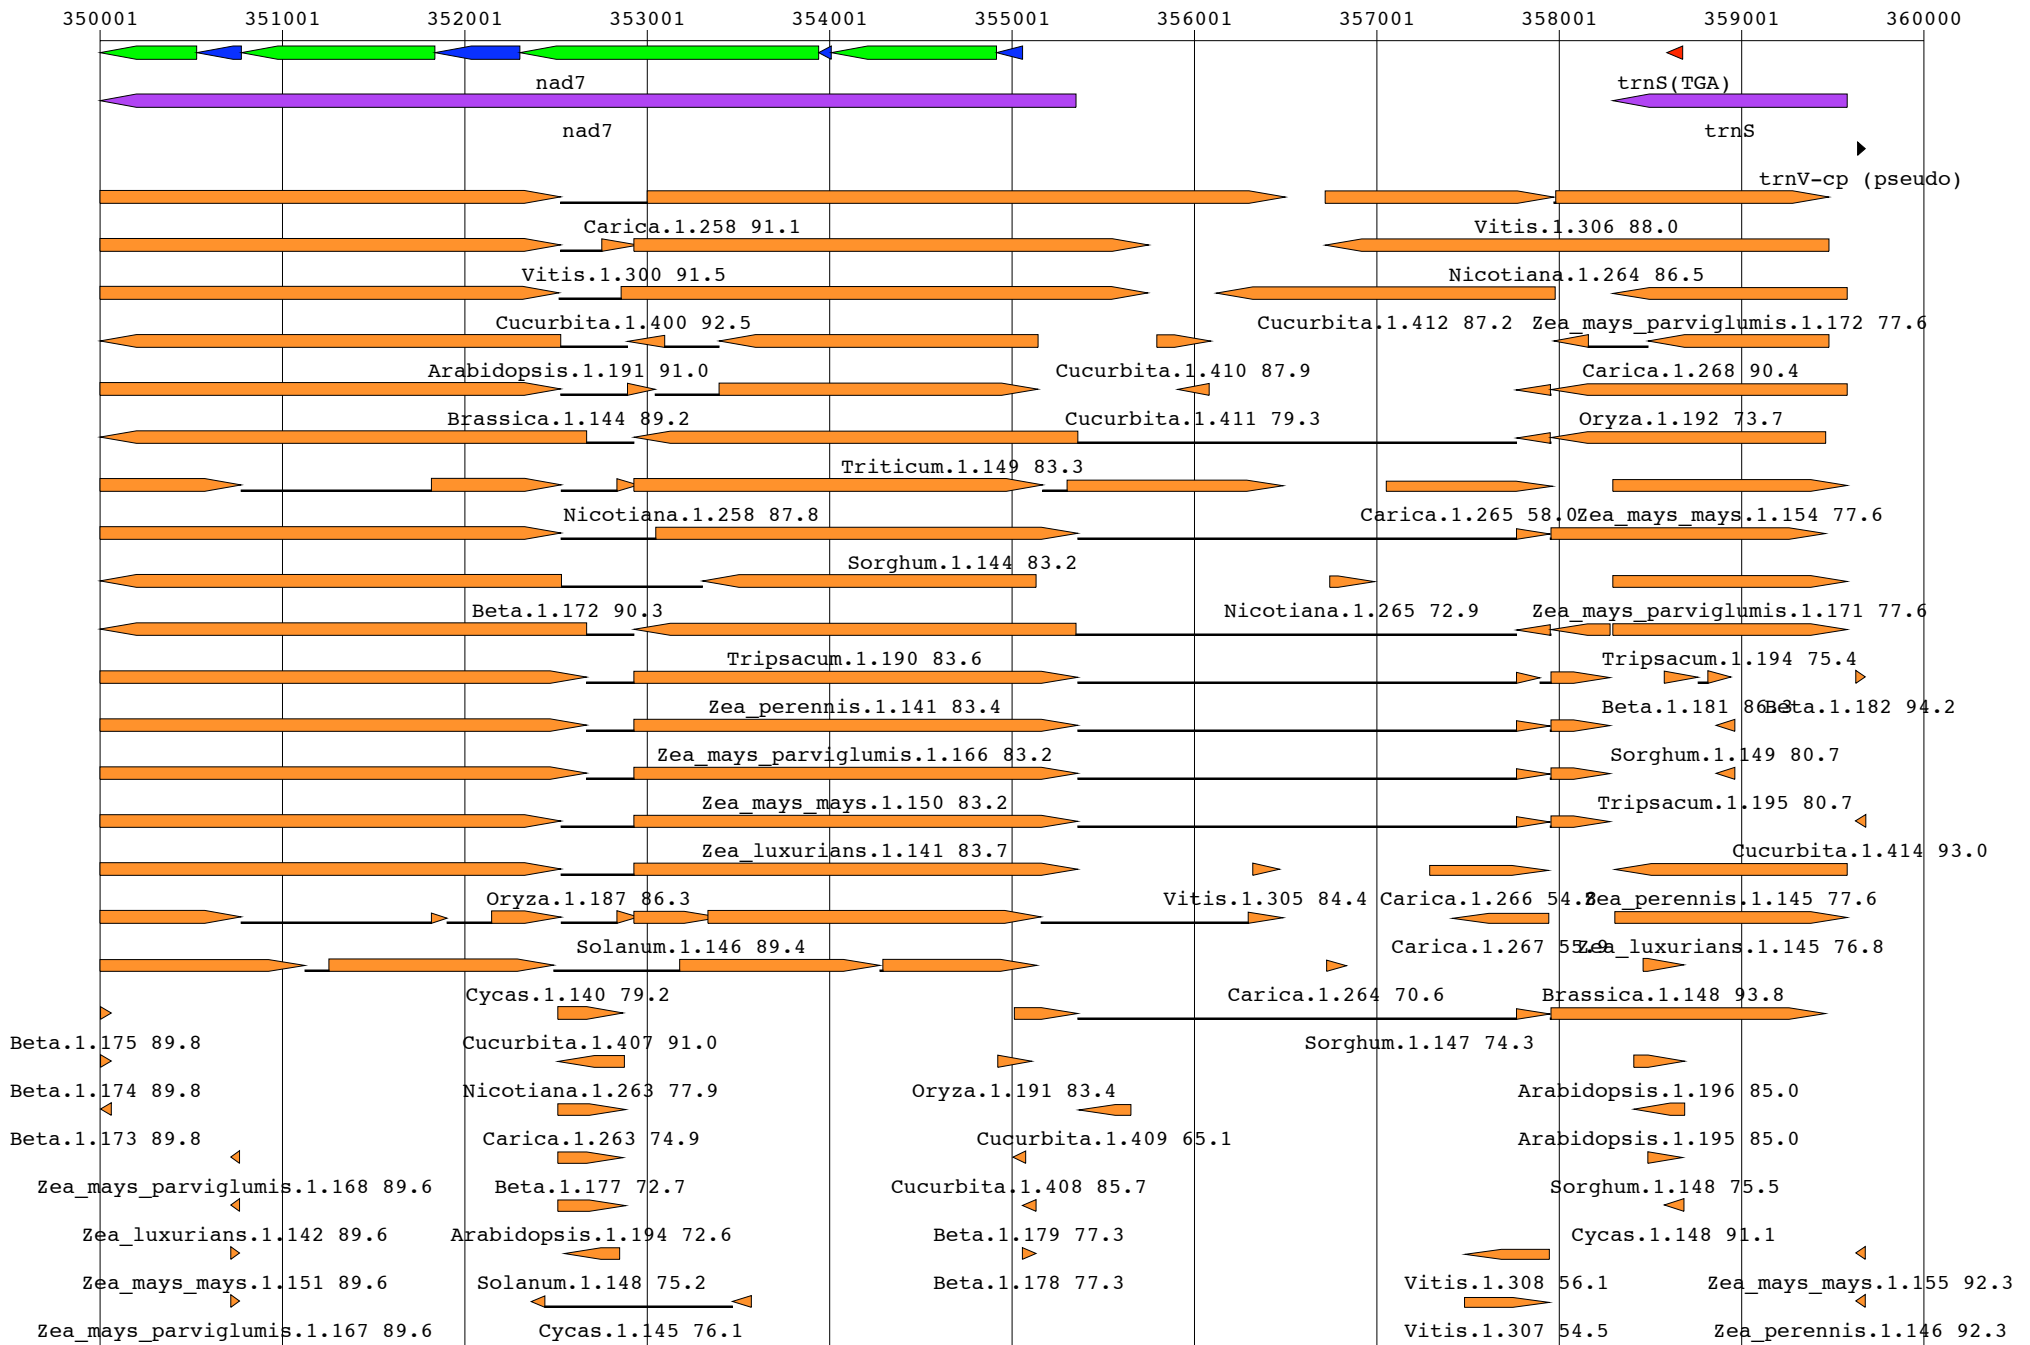

sequence: Citrullus length: 379236

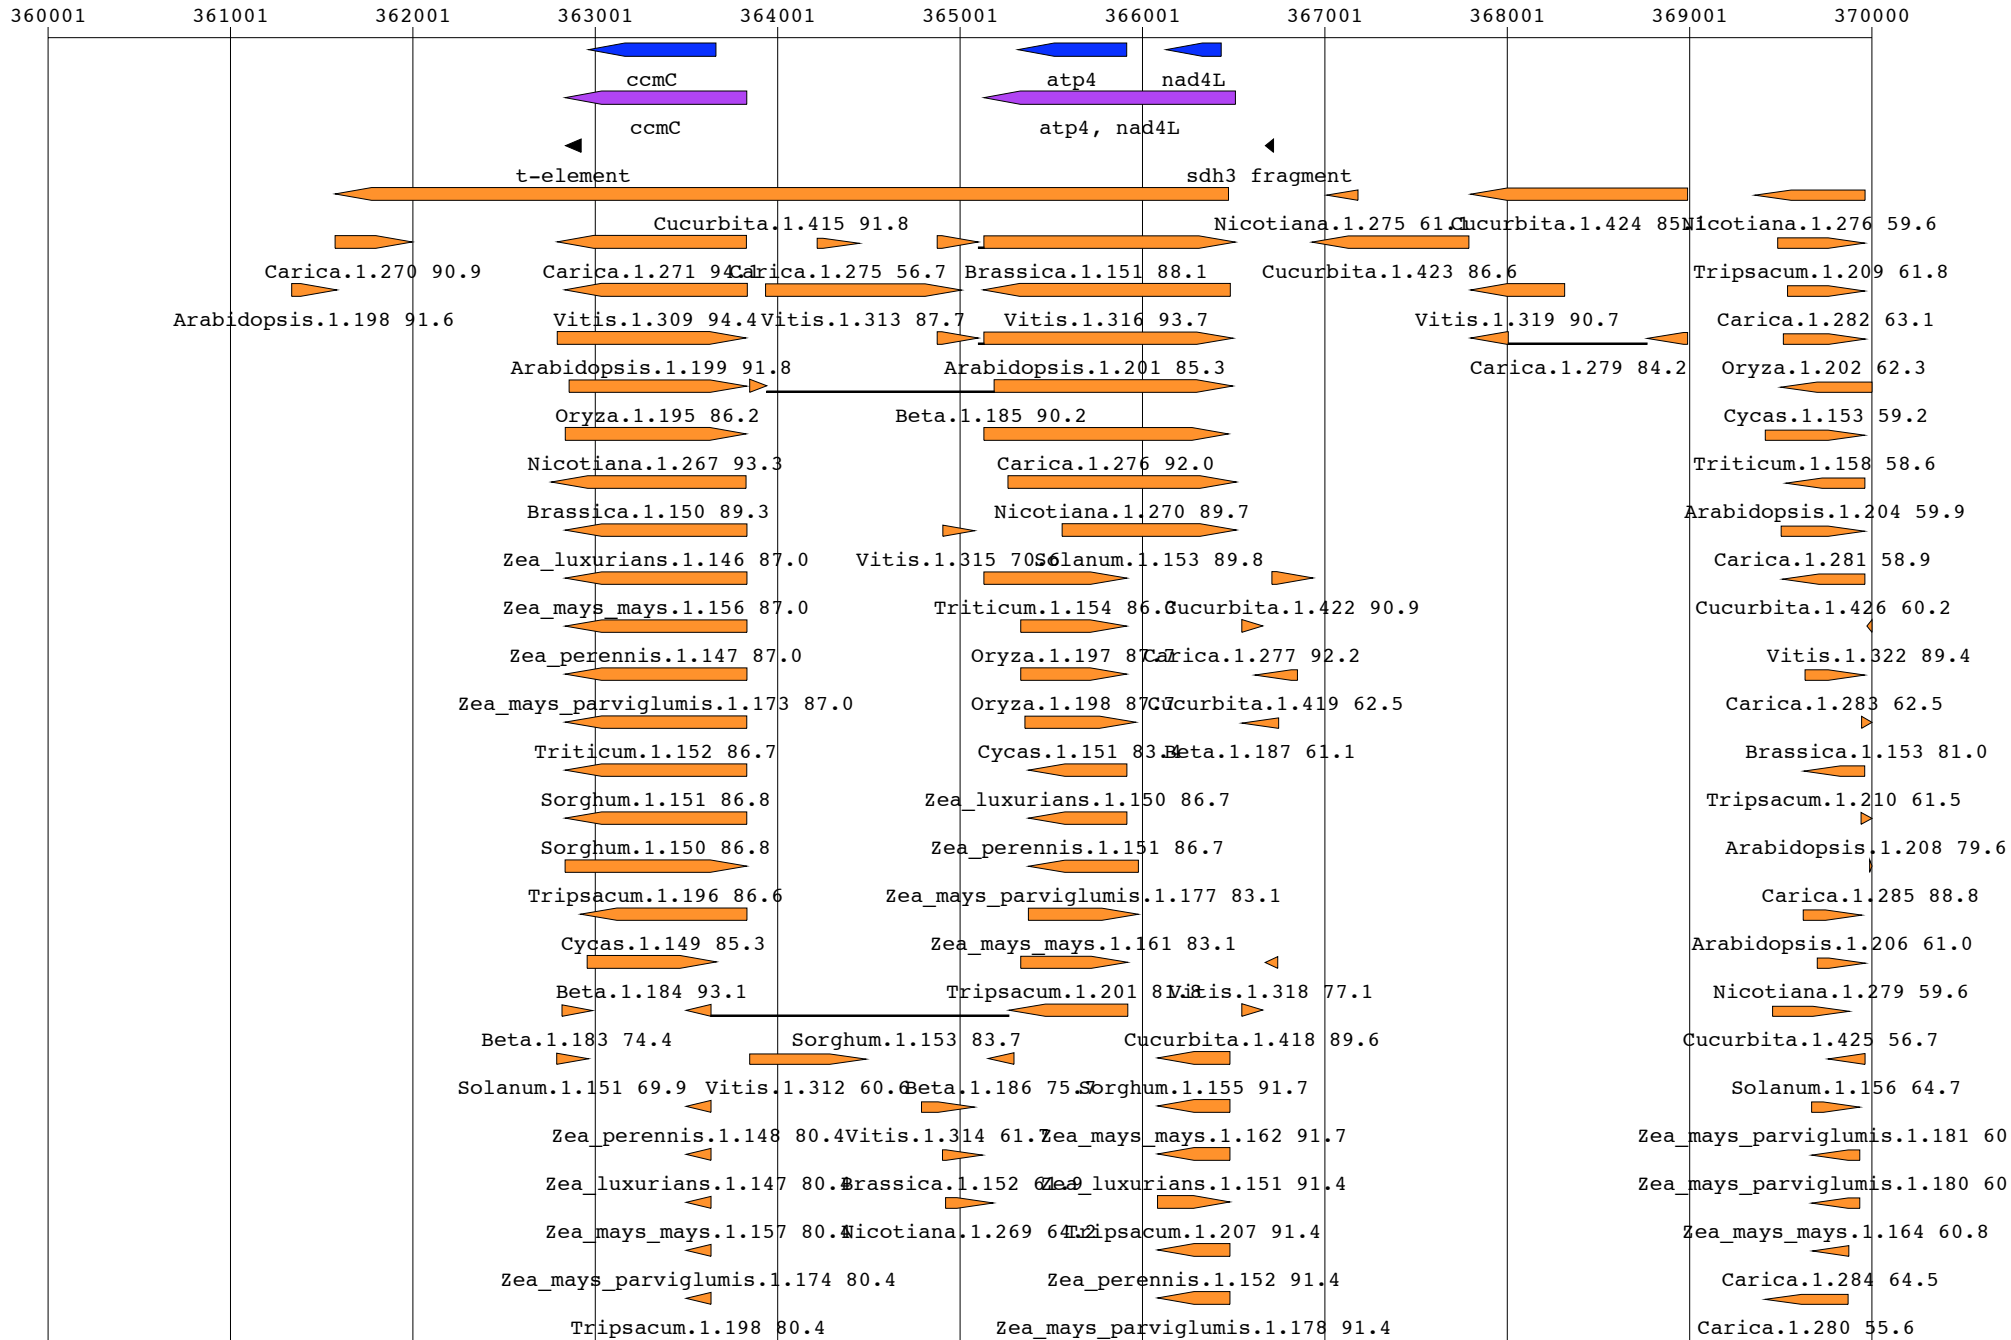

sequence: Citrullus length: 379236

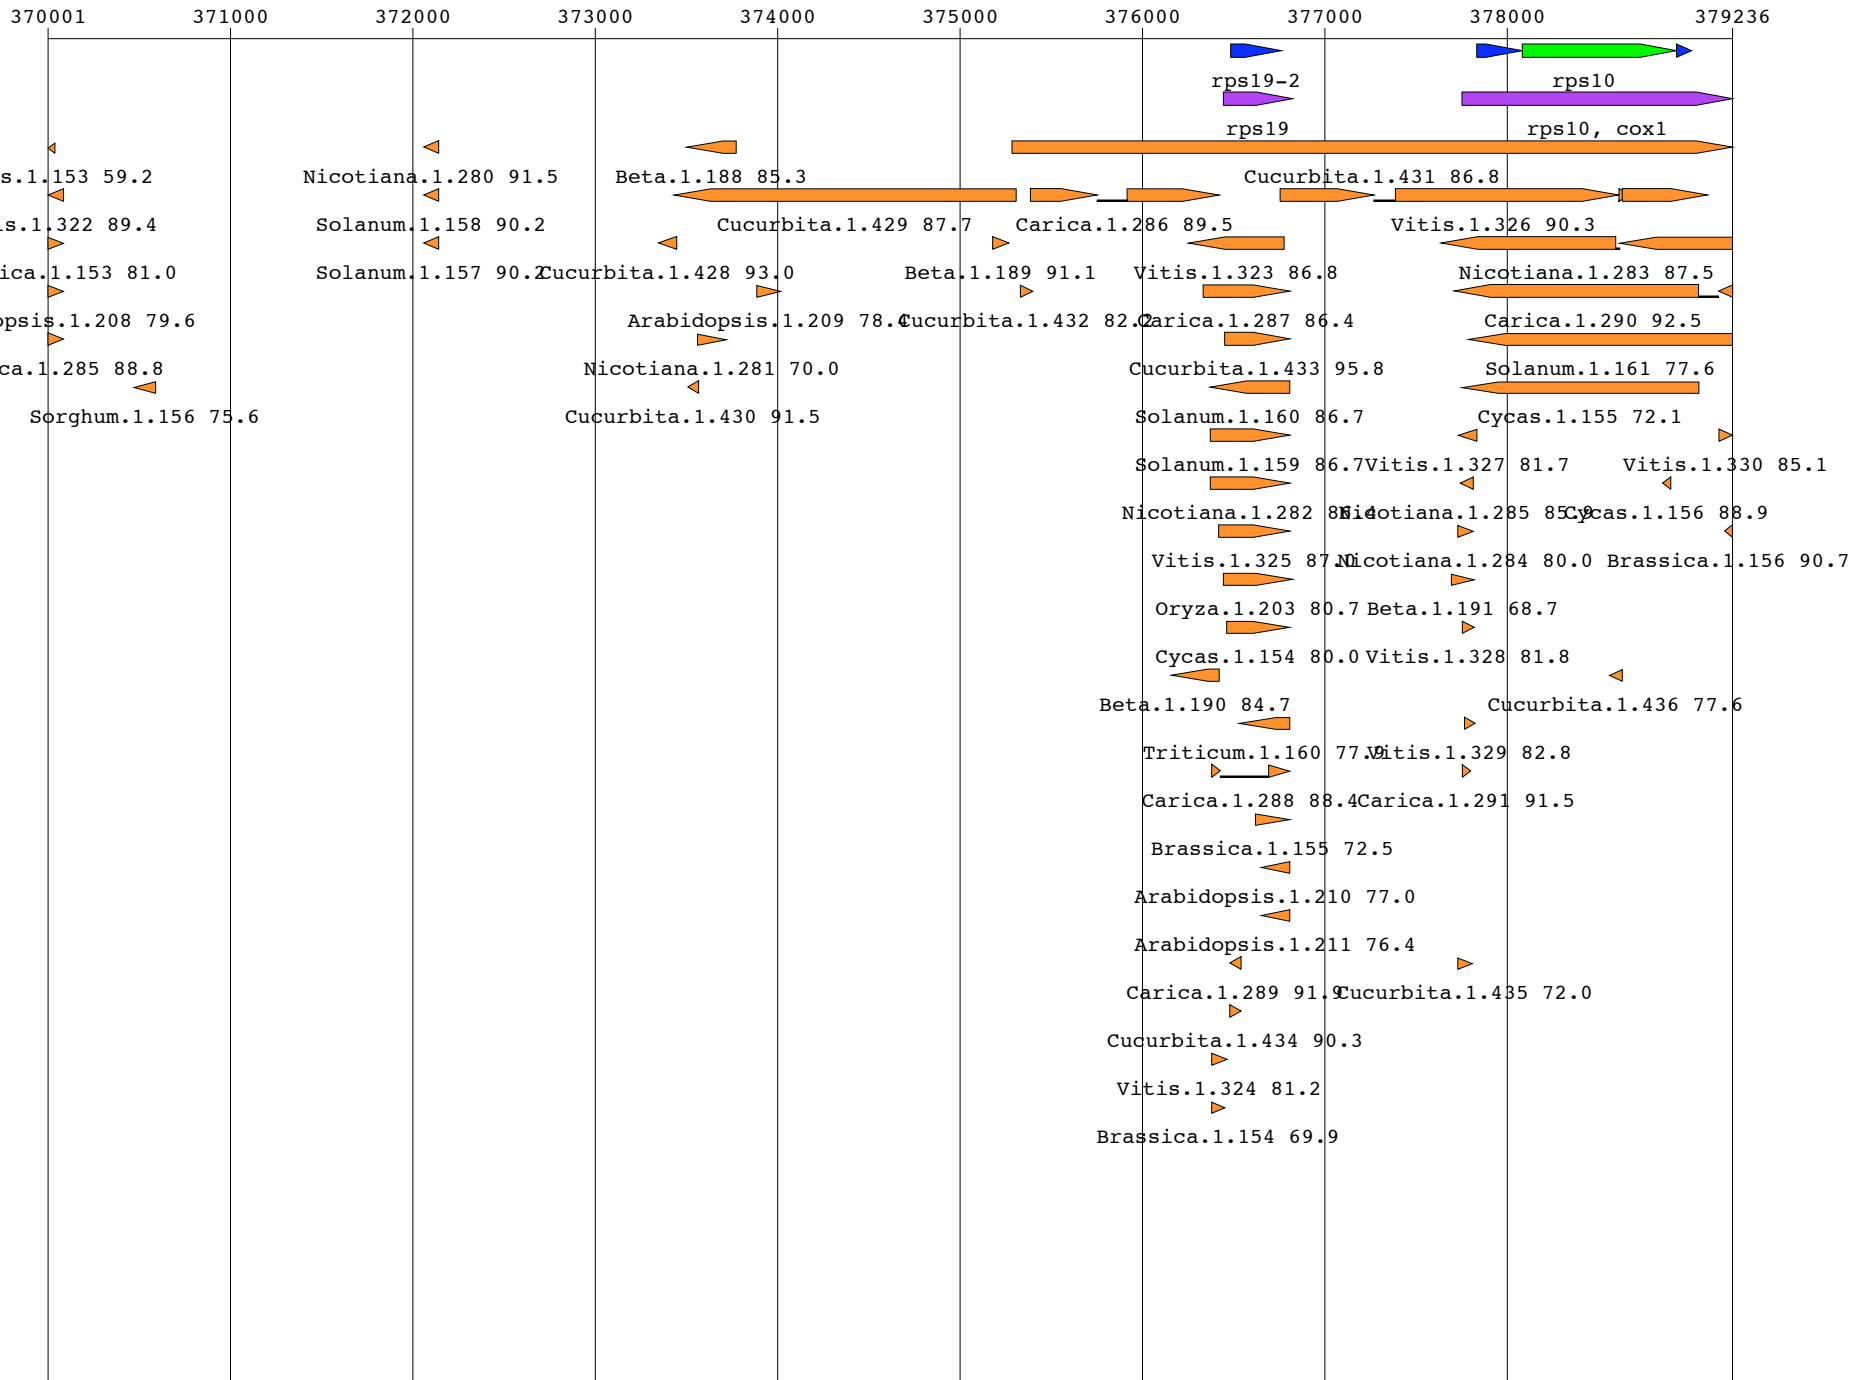

Supplement: msq029_1.pdf [file msq029_1.pdf]
