# Supplementary material
Source: PubMed Central journal article supplement (PMC2877997)

sequence: Cucurbita length: 982833

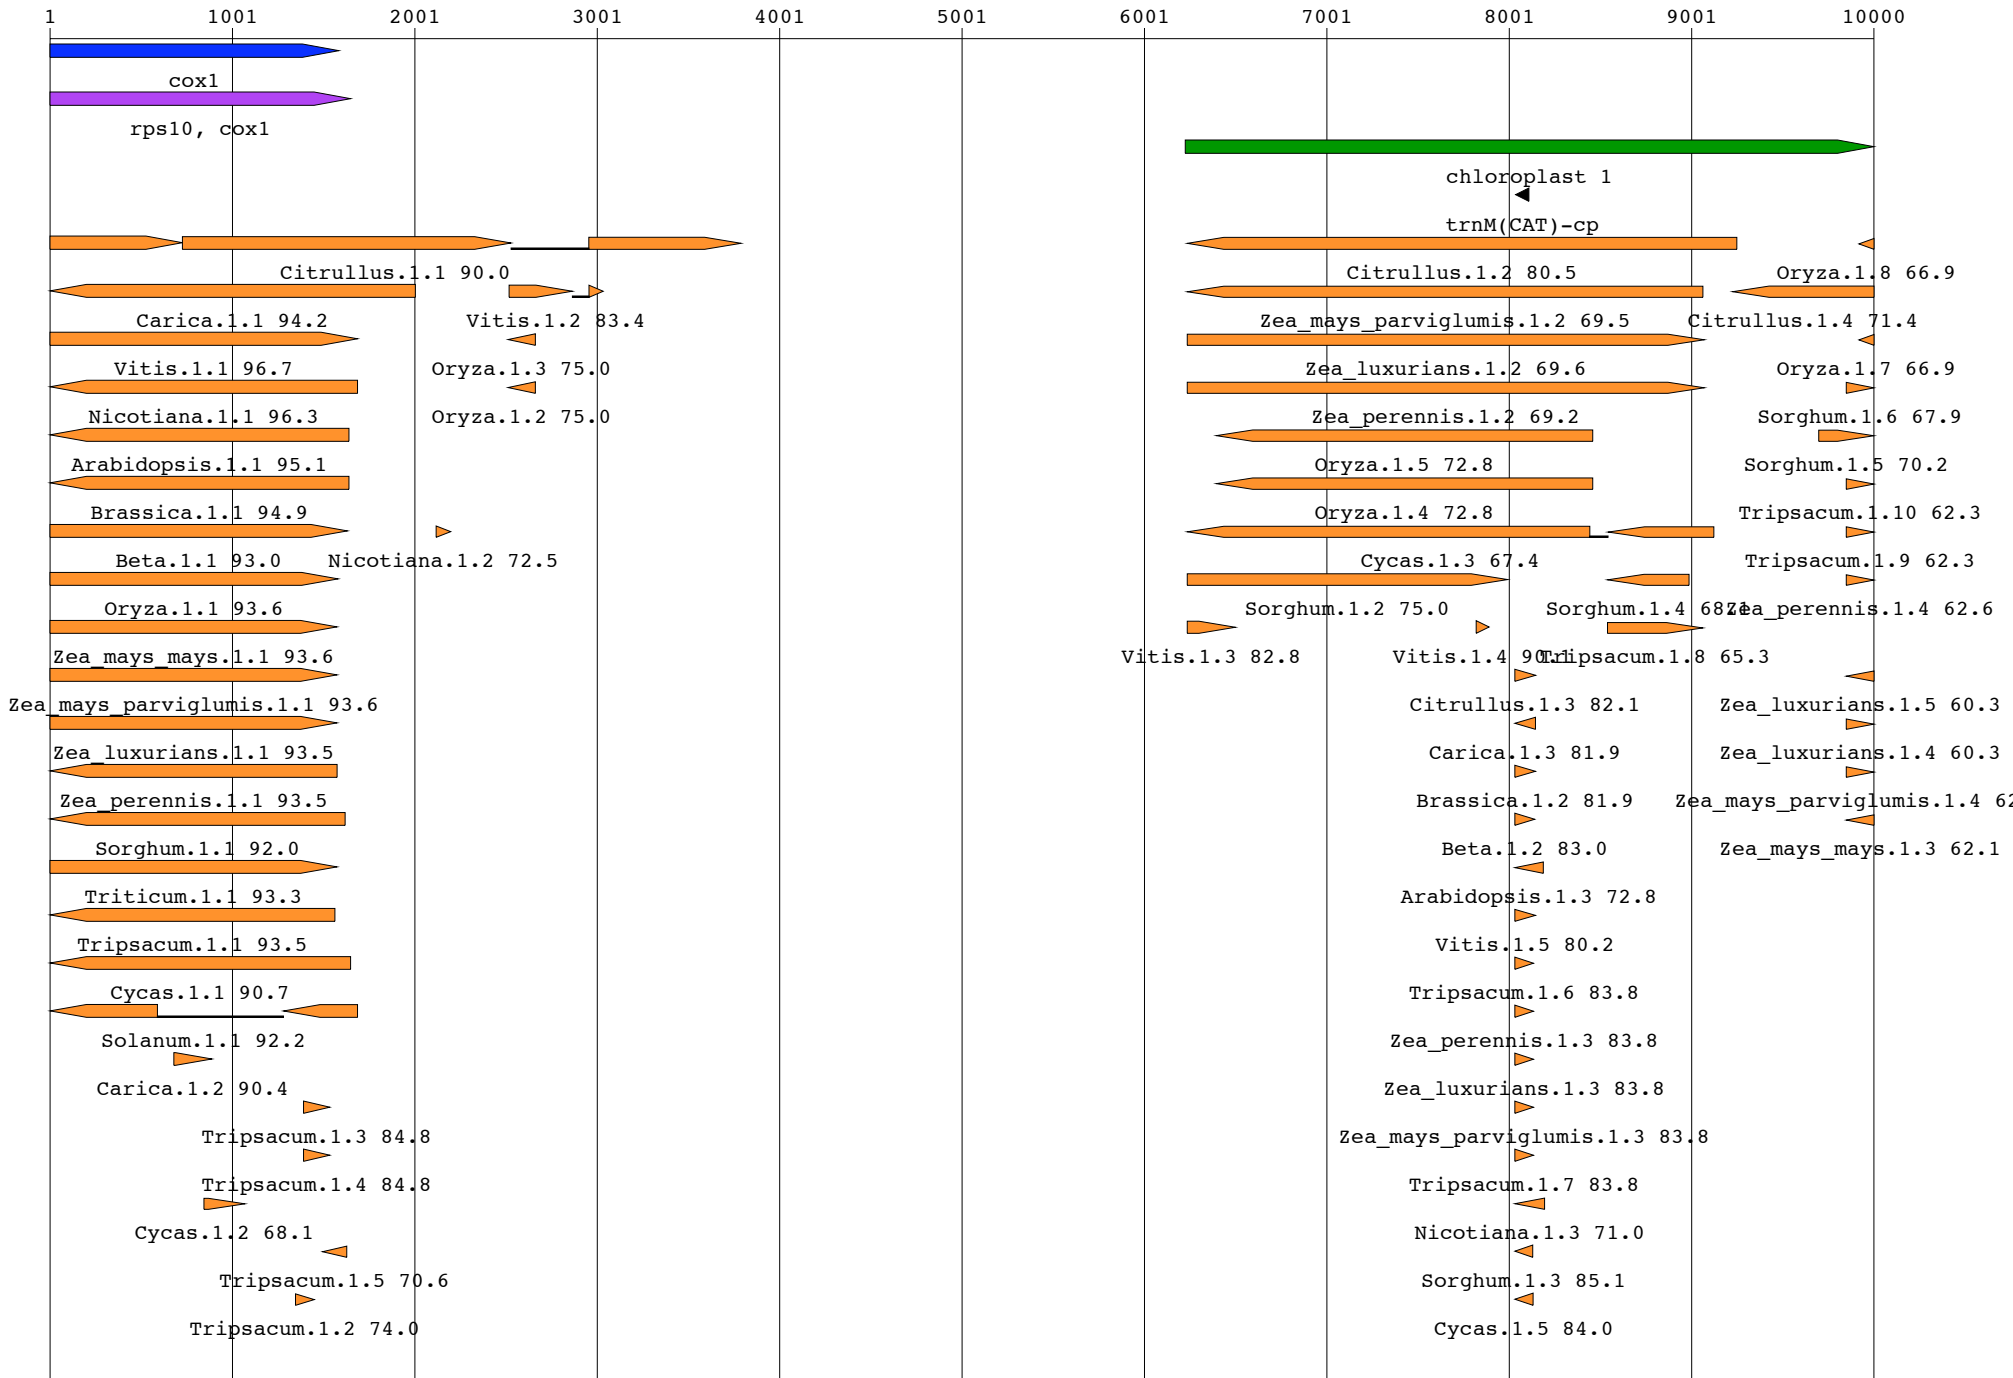

sequence: Cucurbita length: 982833

10001 11001 12001 13001 14001 15001 16001 17001 18001 19001 20000

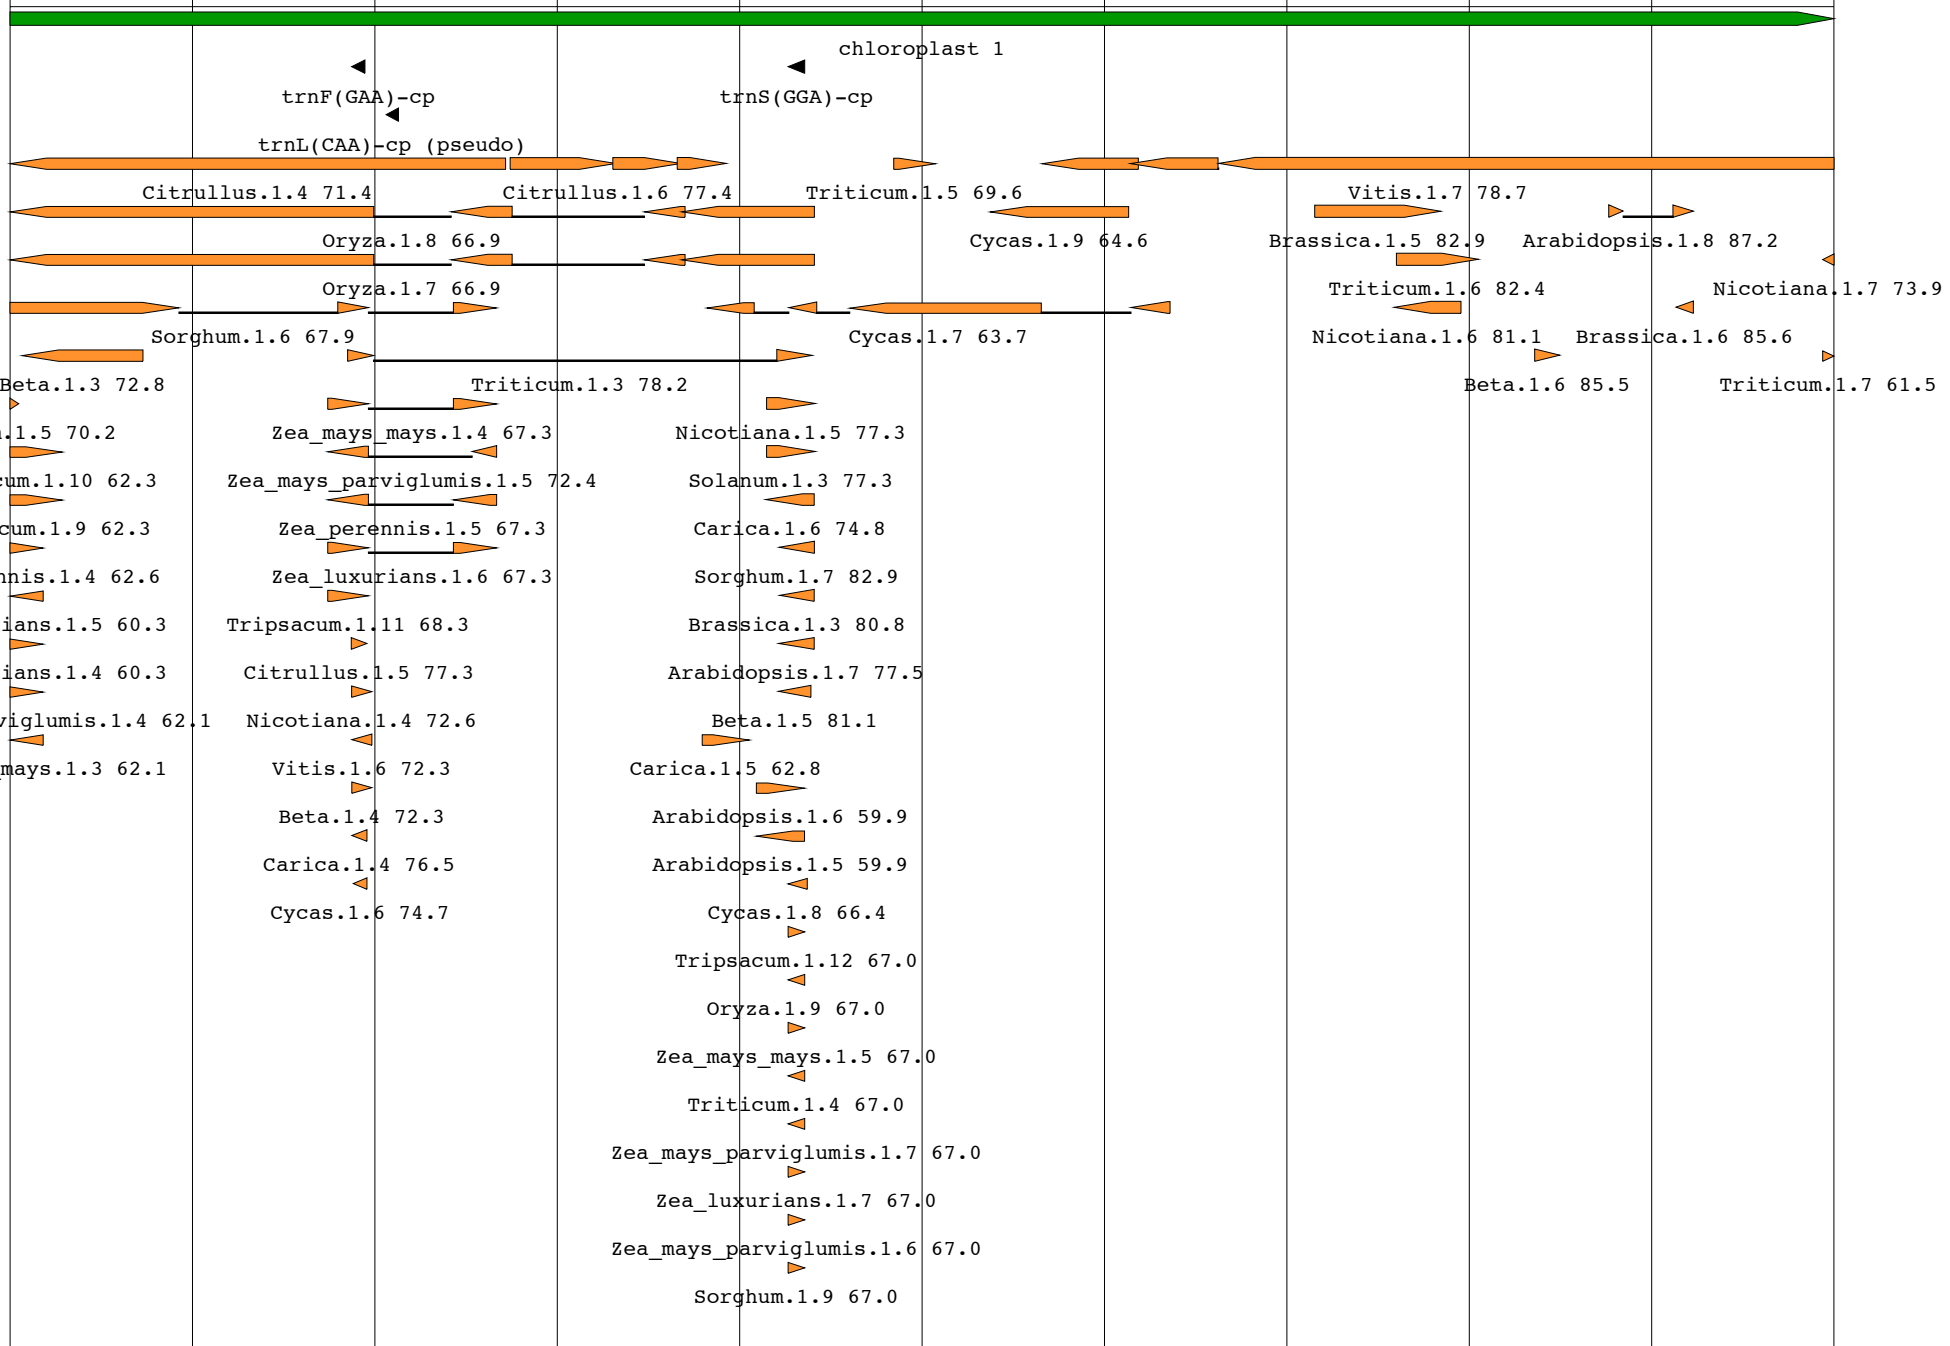

sequence: Cucurbita length: 982833

20001 21001 22001 23001 24001 25001 26001 27001 28001 29001 30000

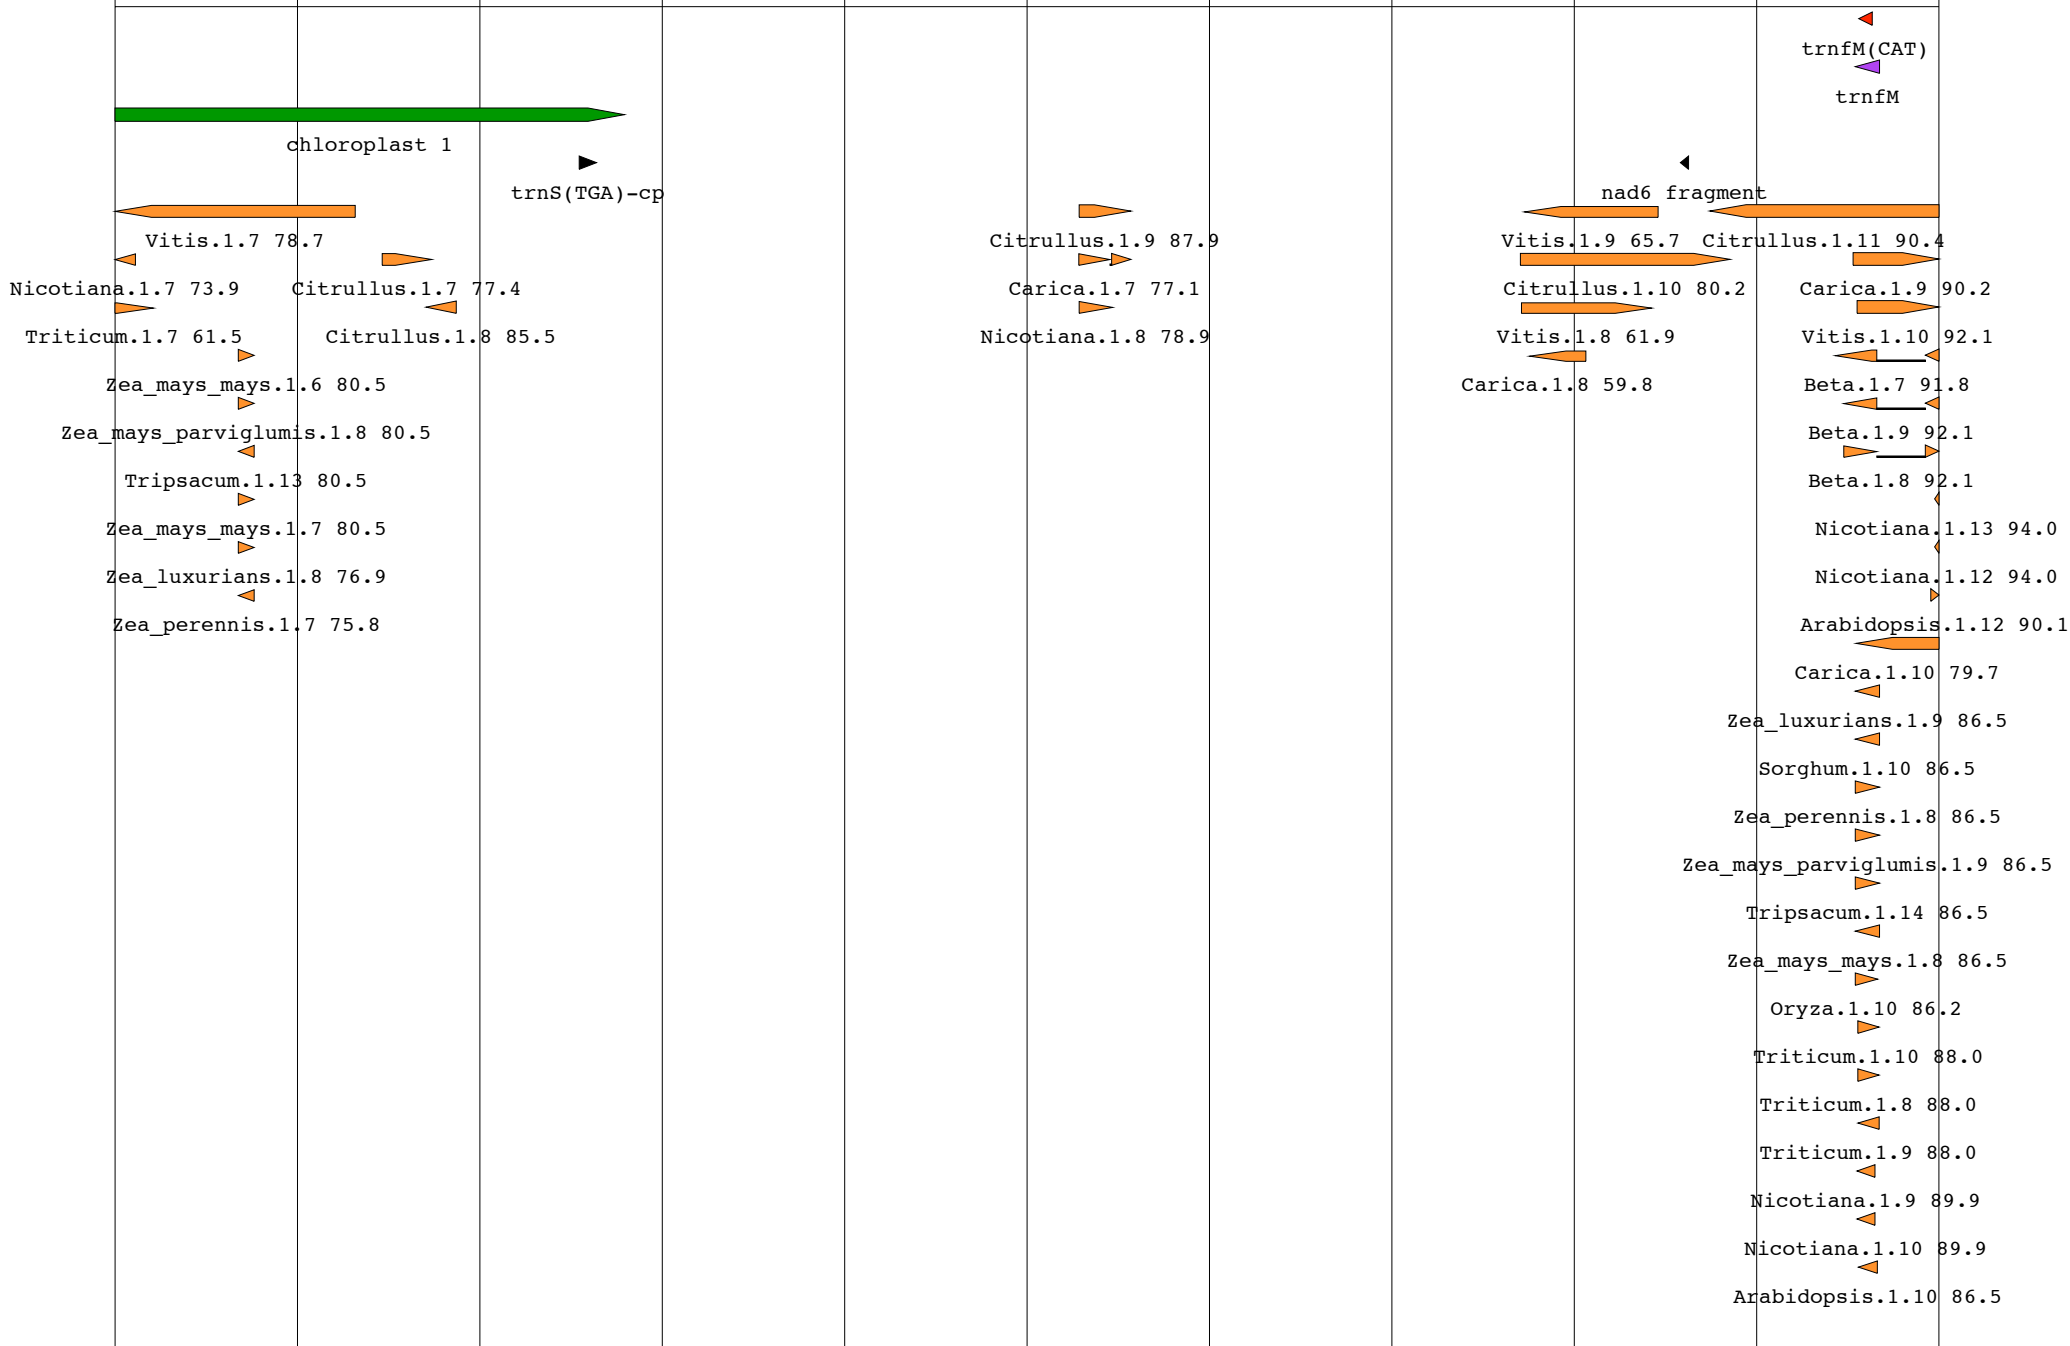

sequence: Cucurbita length: 982833

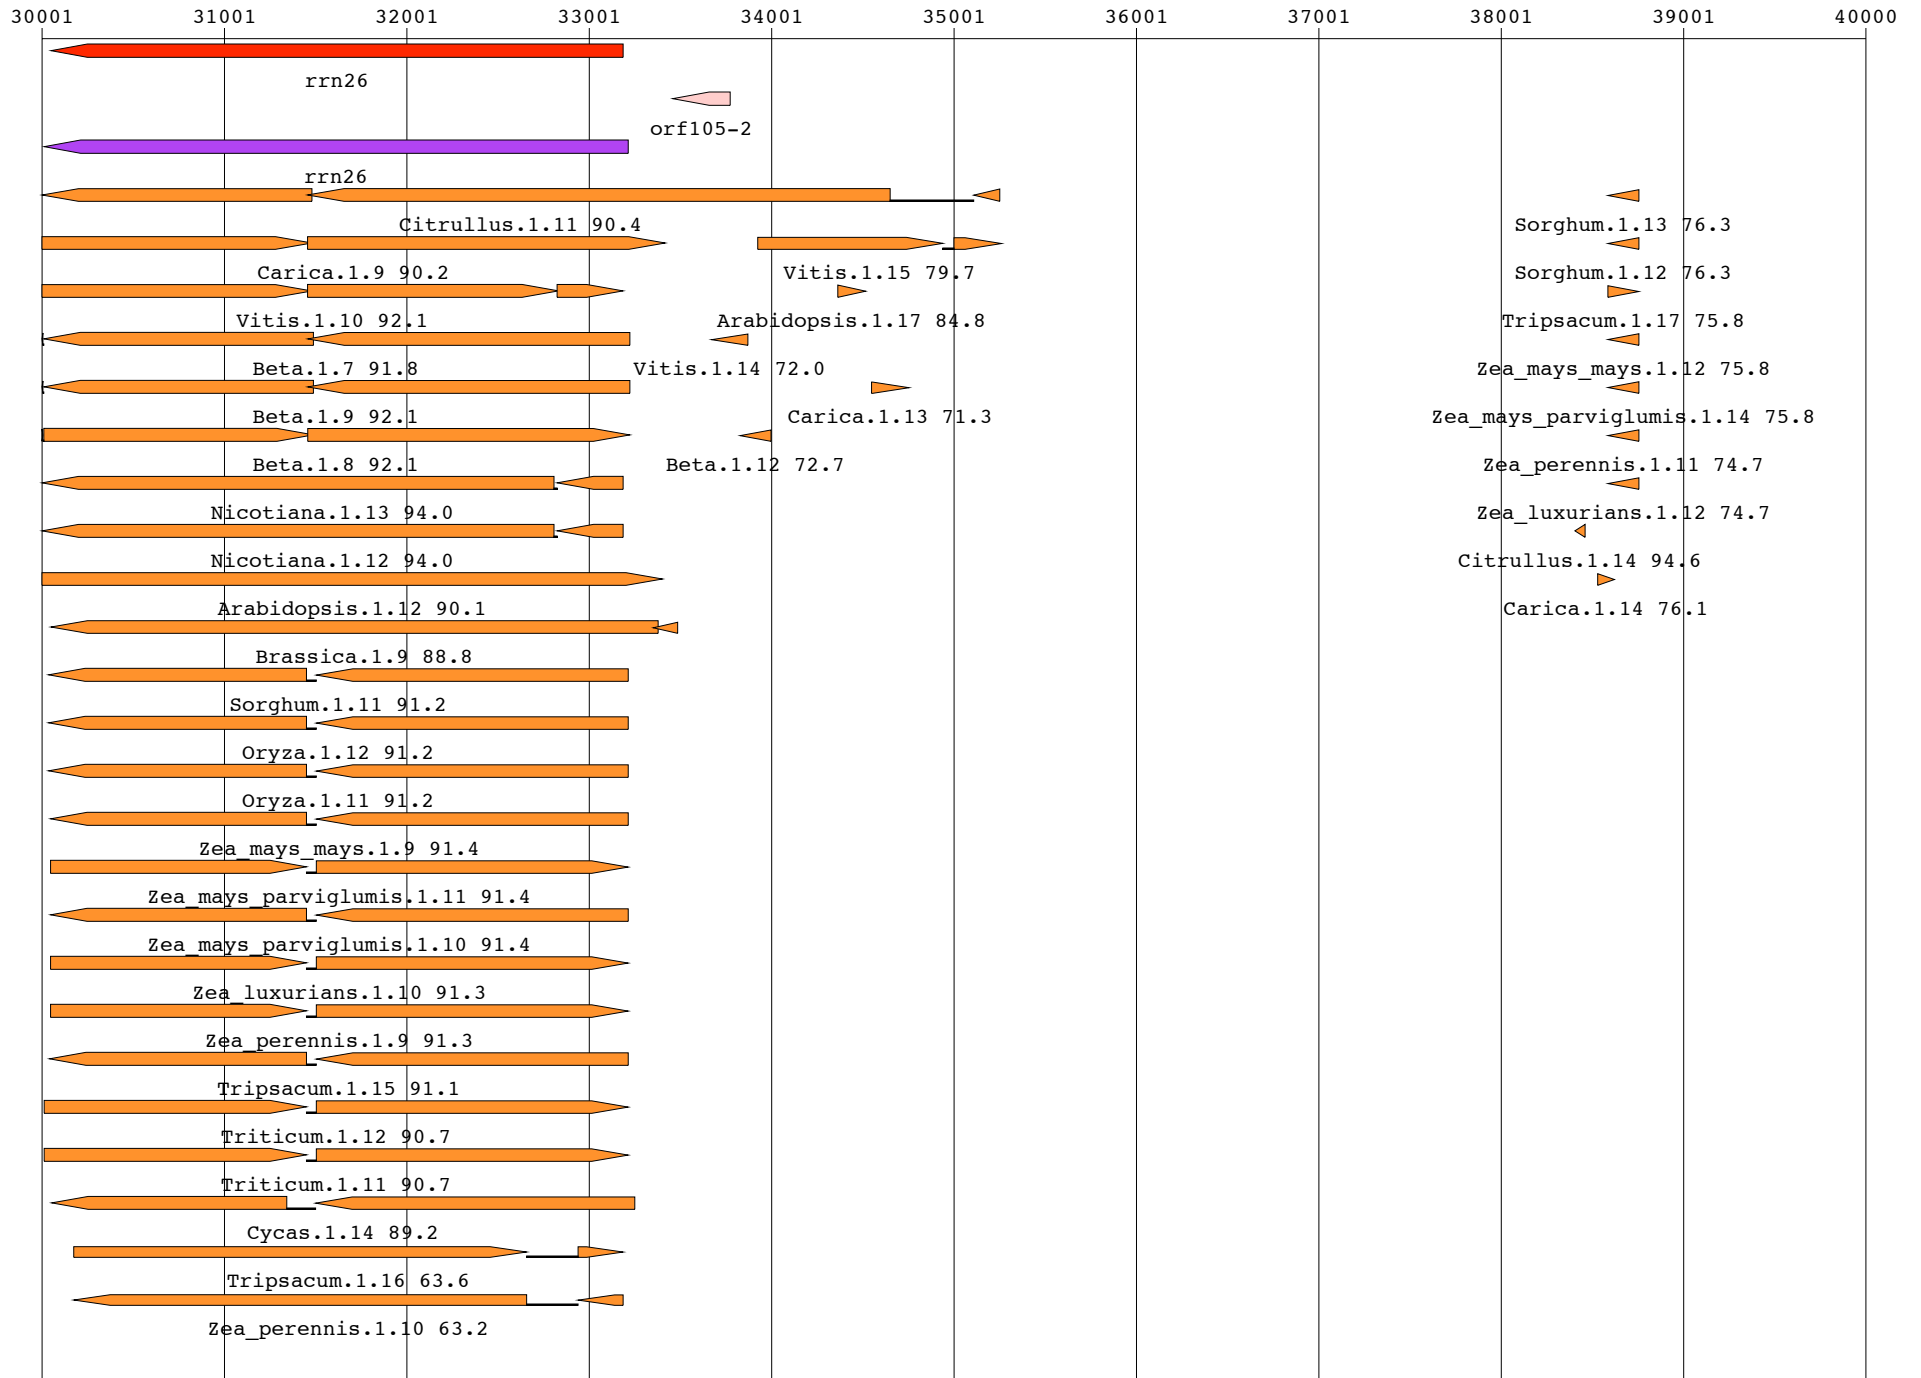

sequence: Cucurbita length: 982833

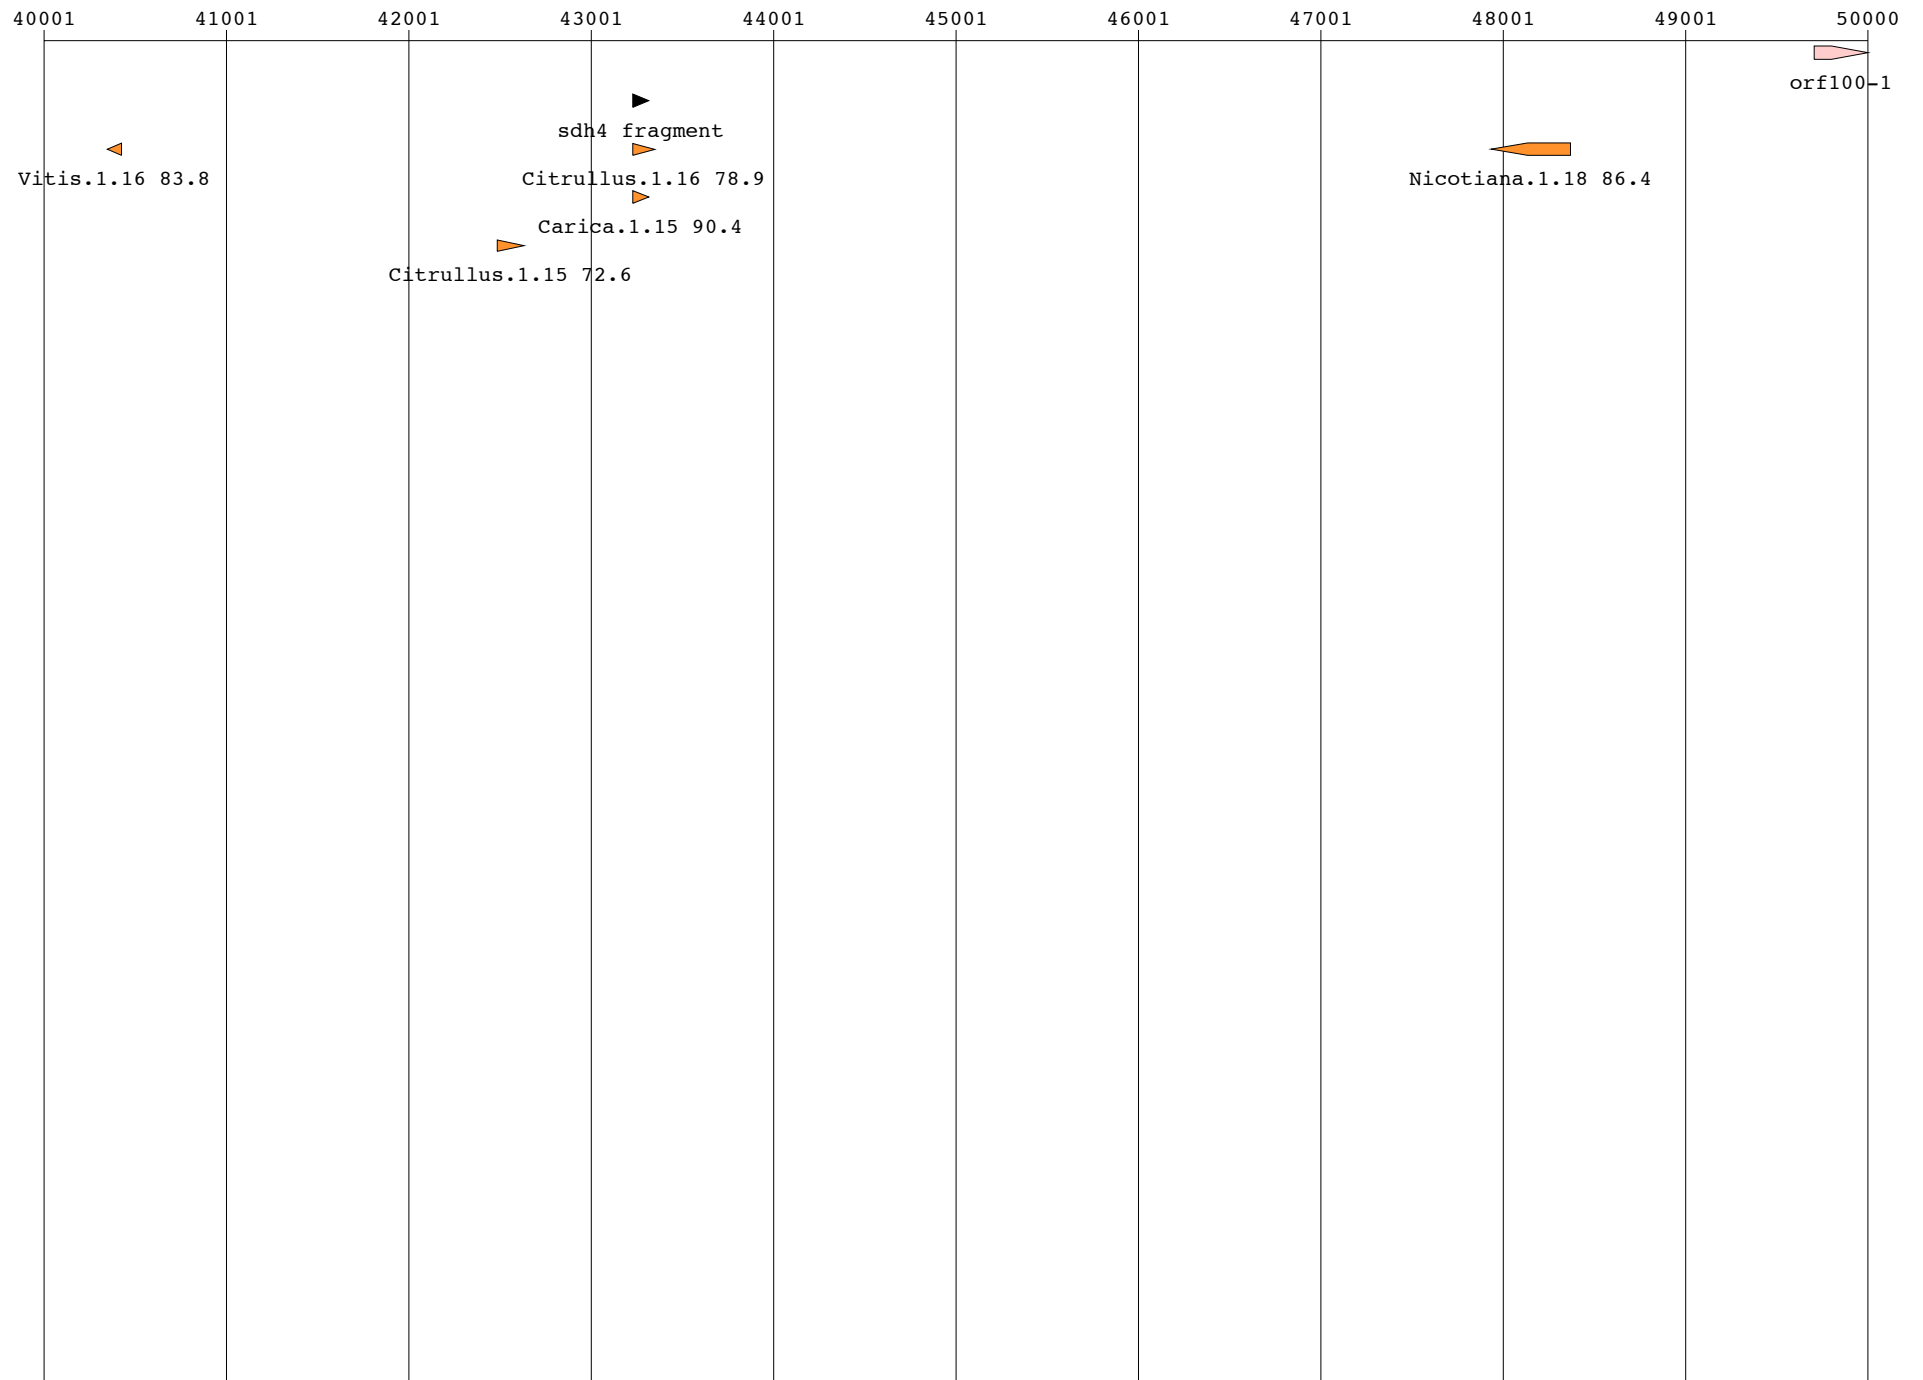

sequence: Cucurbita length: 982833

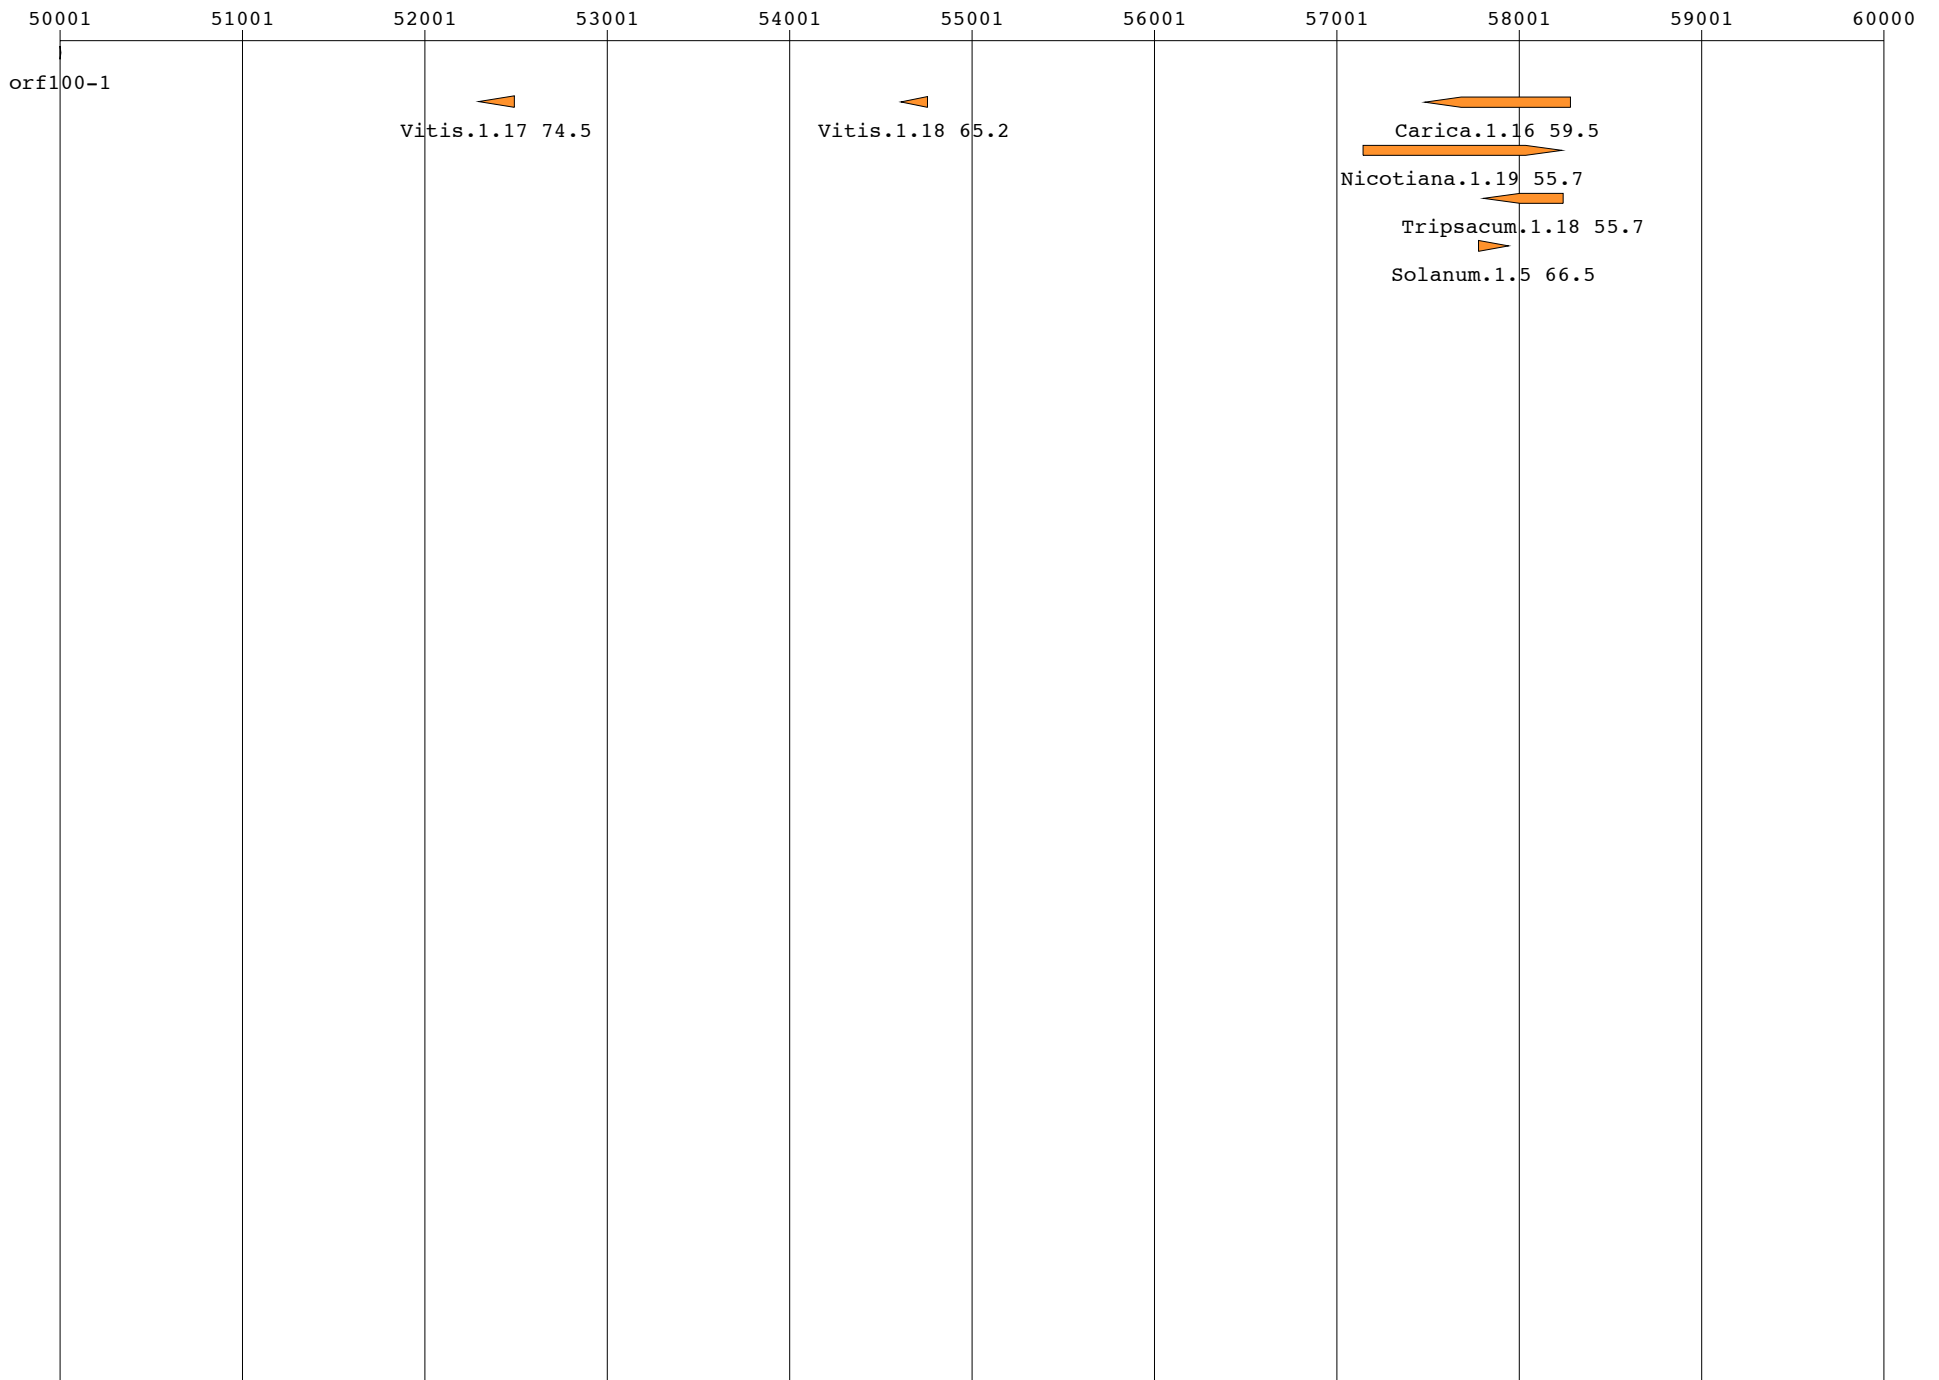

sequence: Cucurbita length: 982833

60001 61001 62001 63001 64001 65001 66001 67001 68001 69001 70000

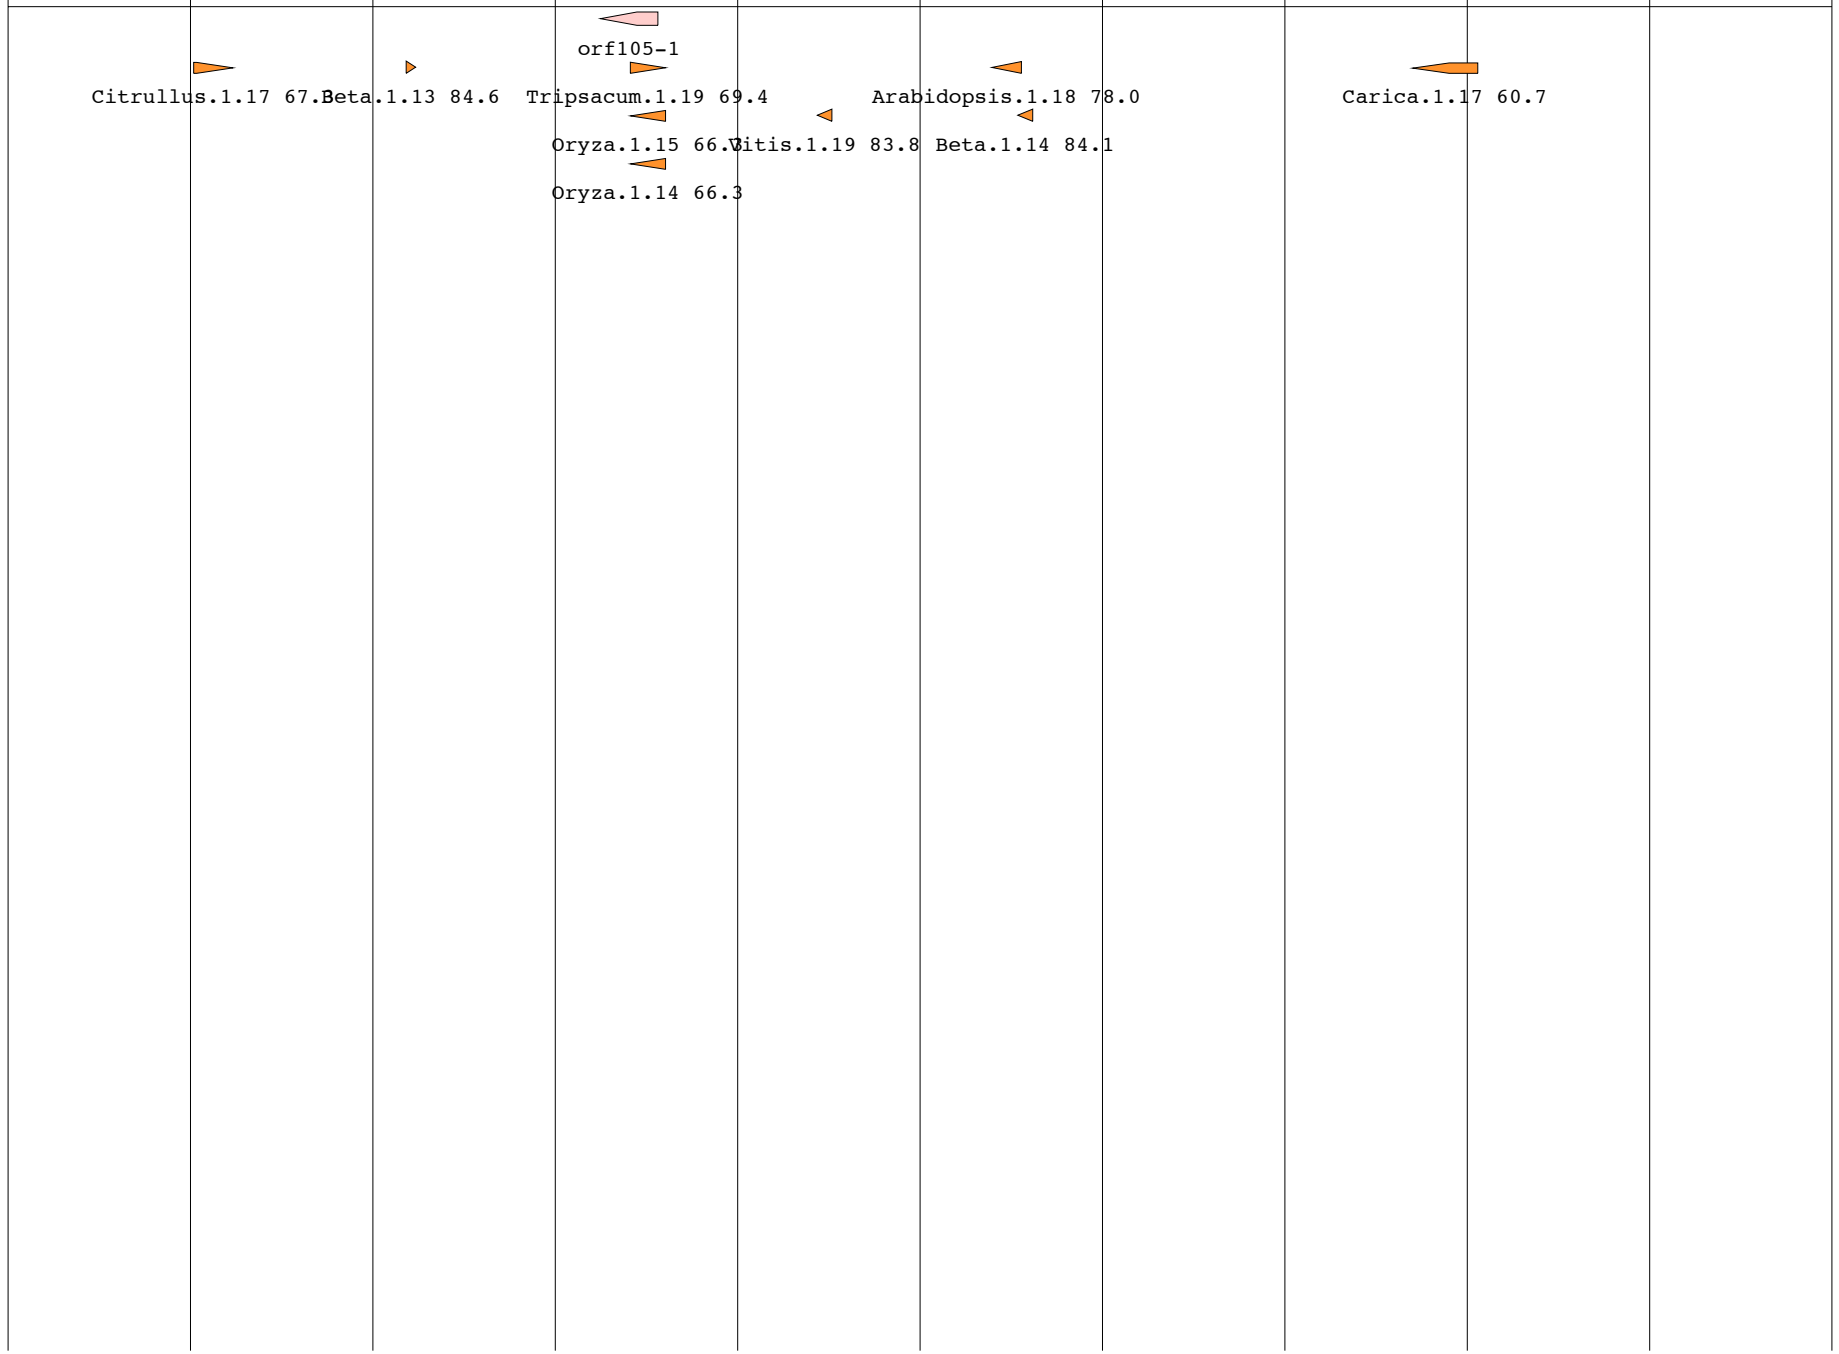

sequence: Cucurbita length: 982833

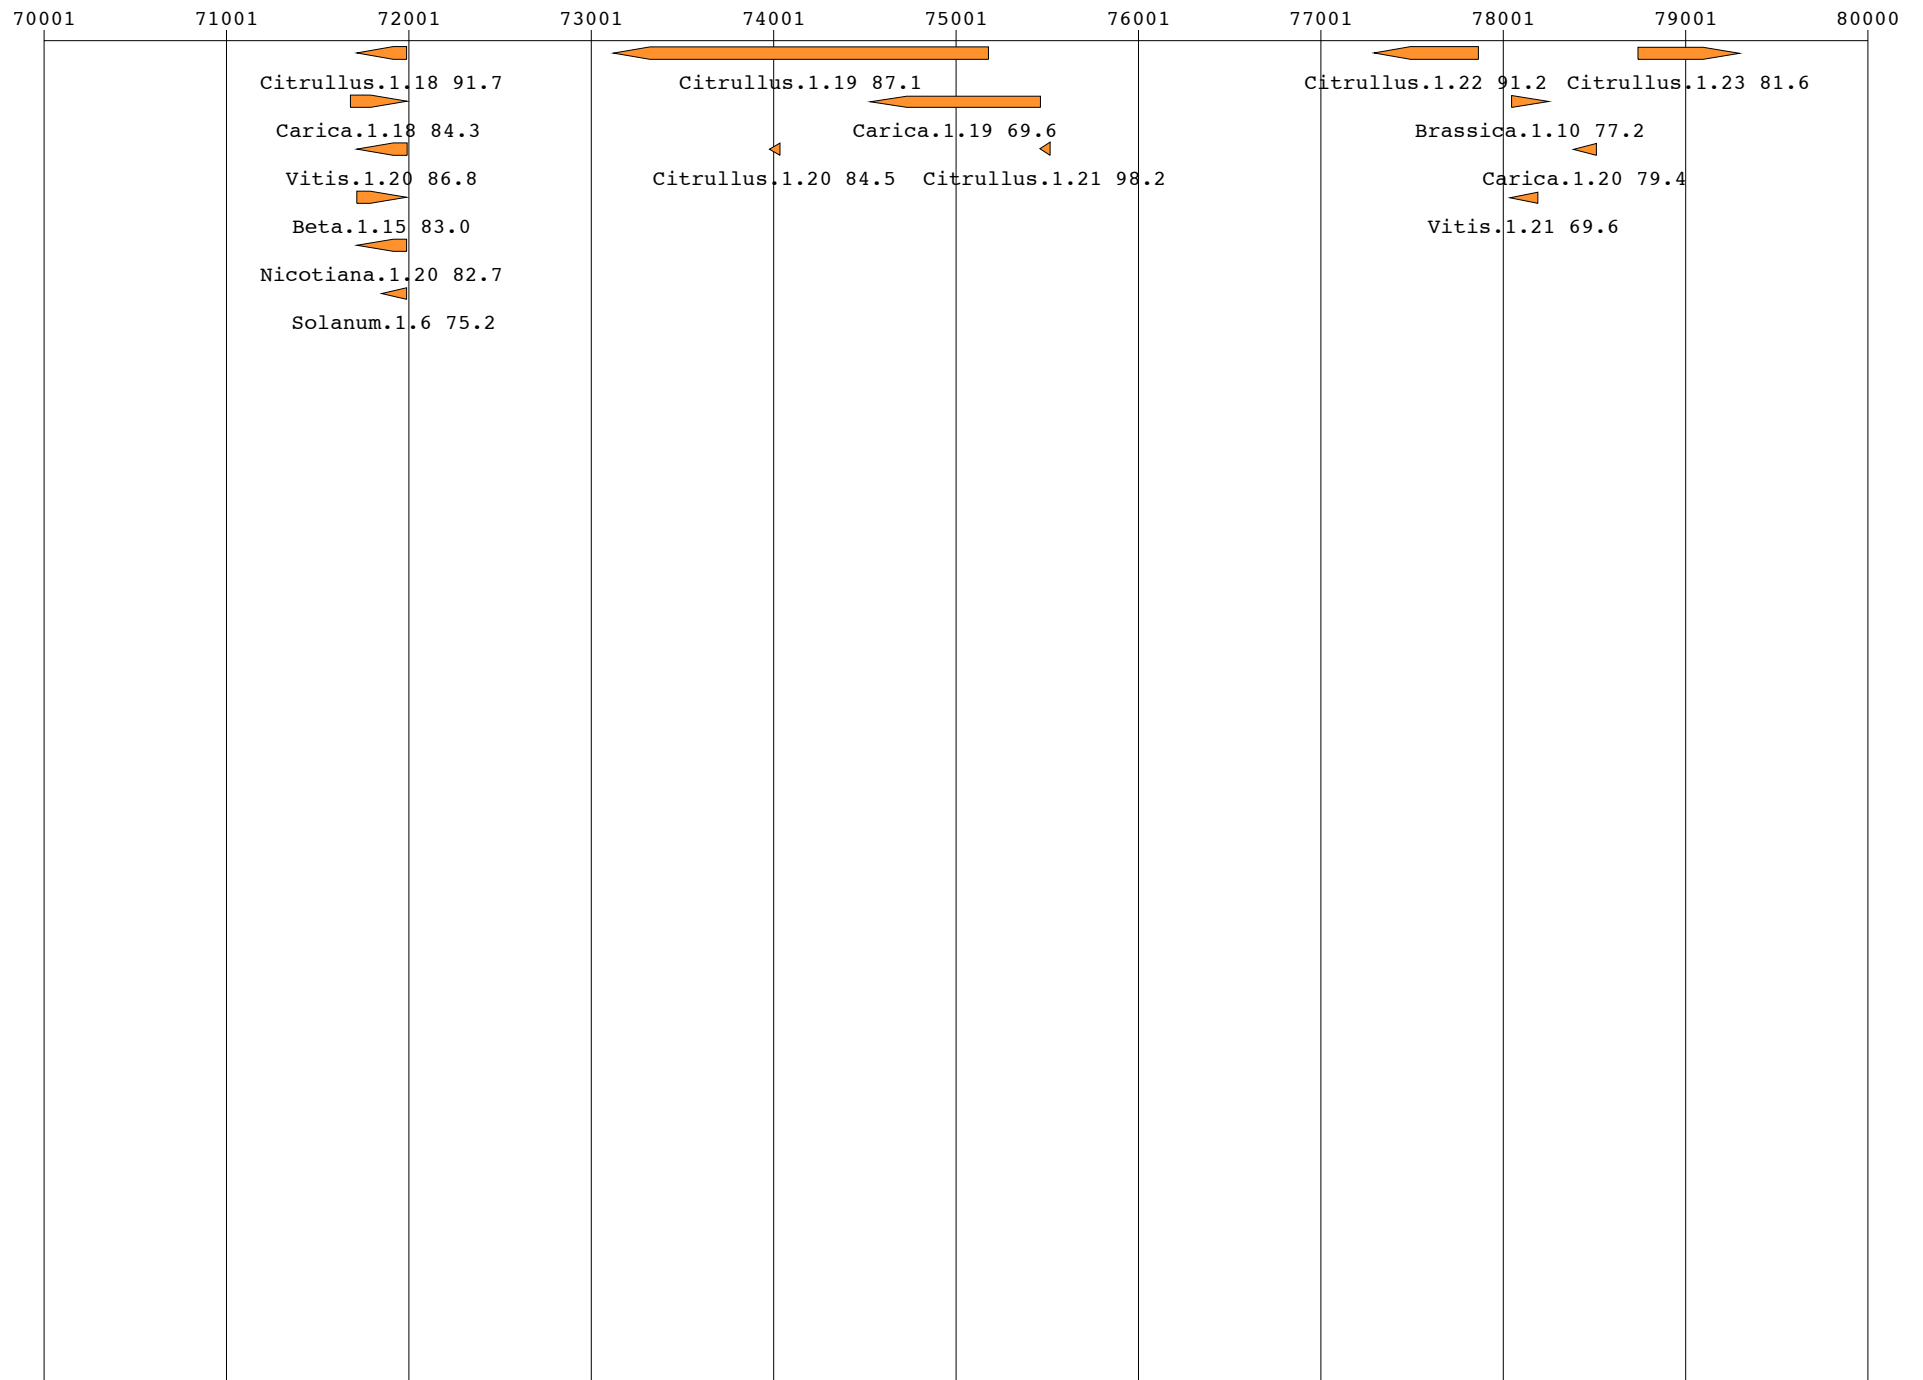



sequence: Cucurbita length: 982833

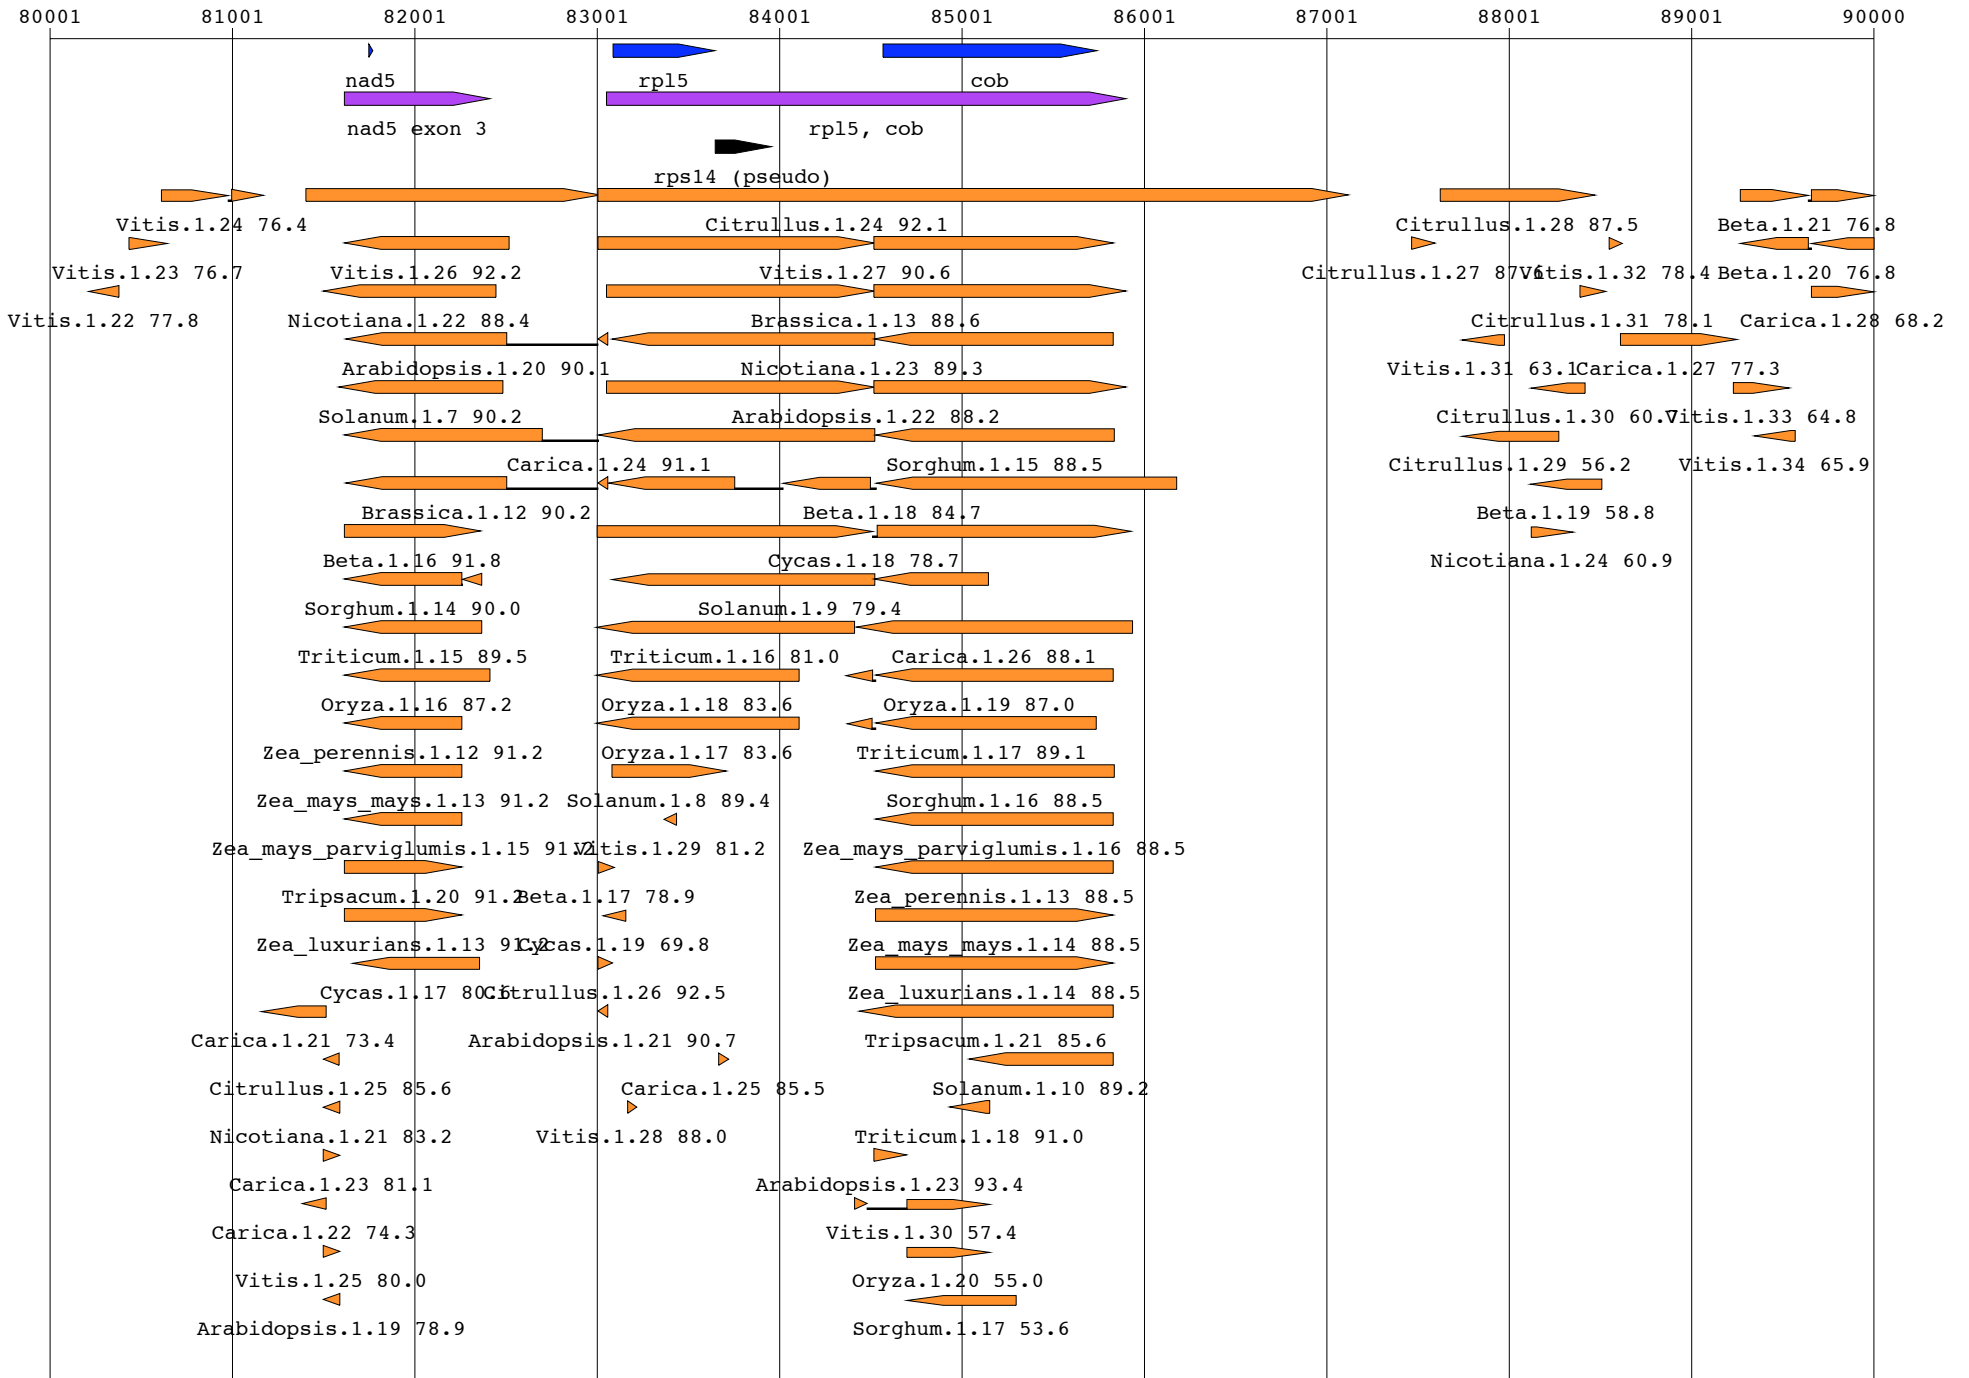

sequence: Cucurbita length: 982833

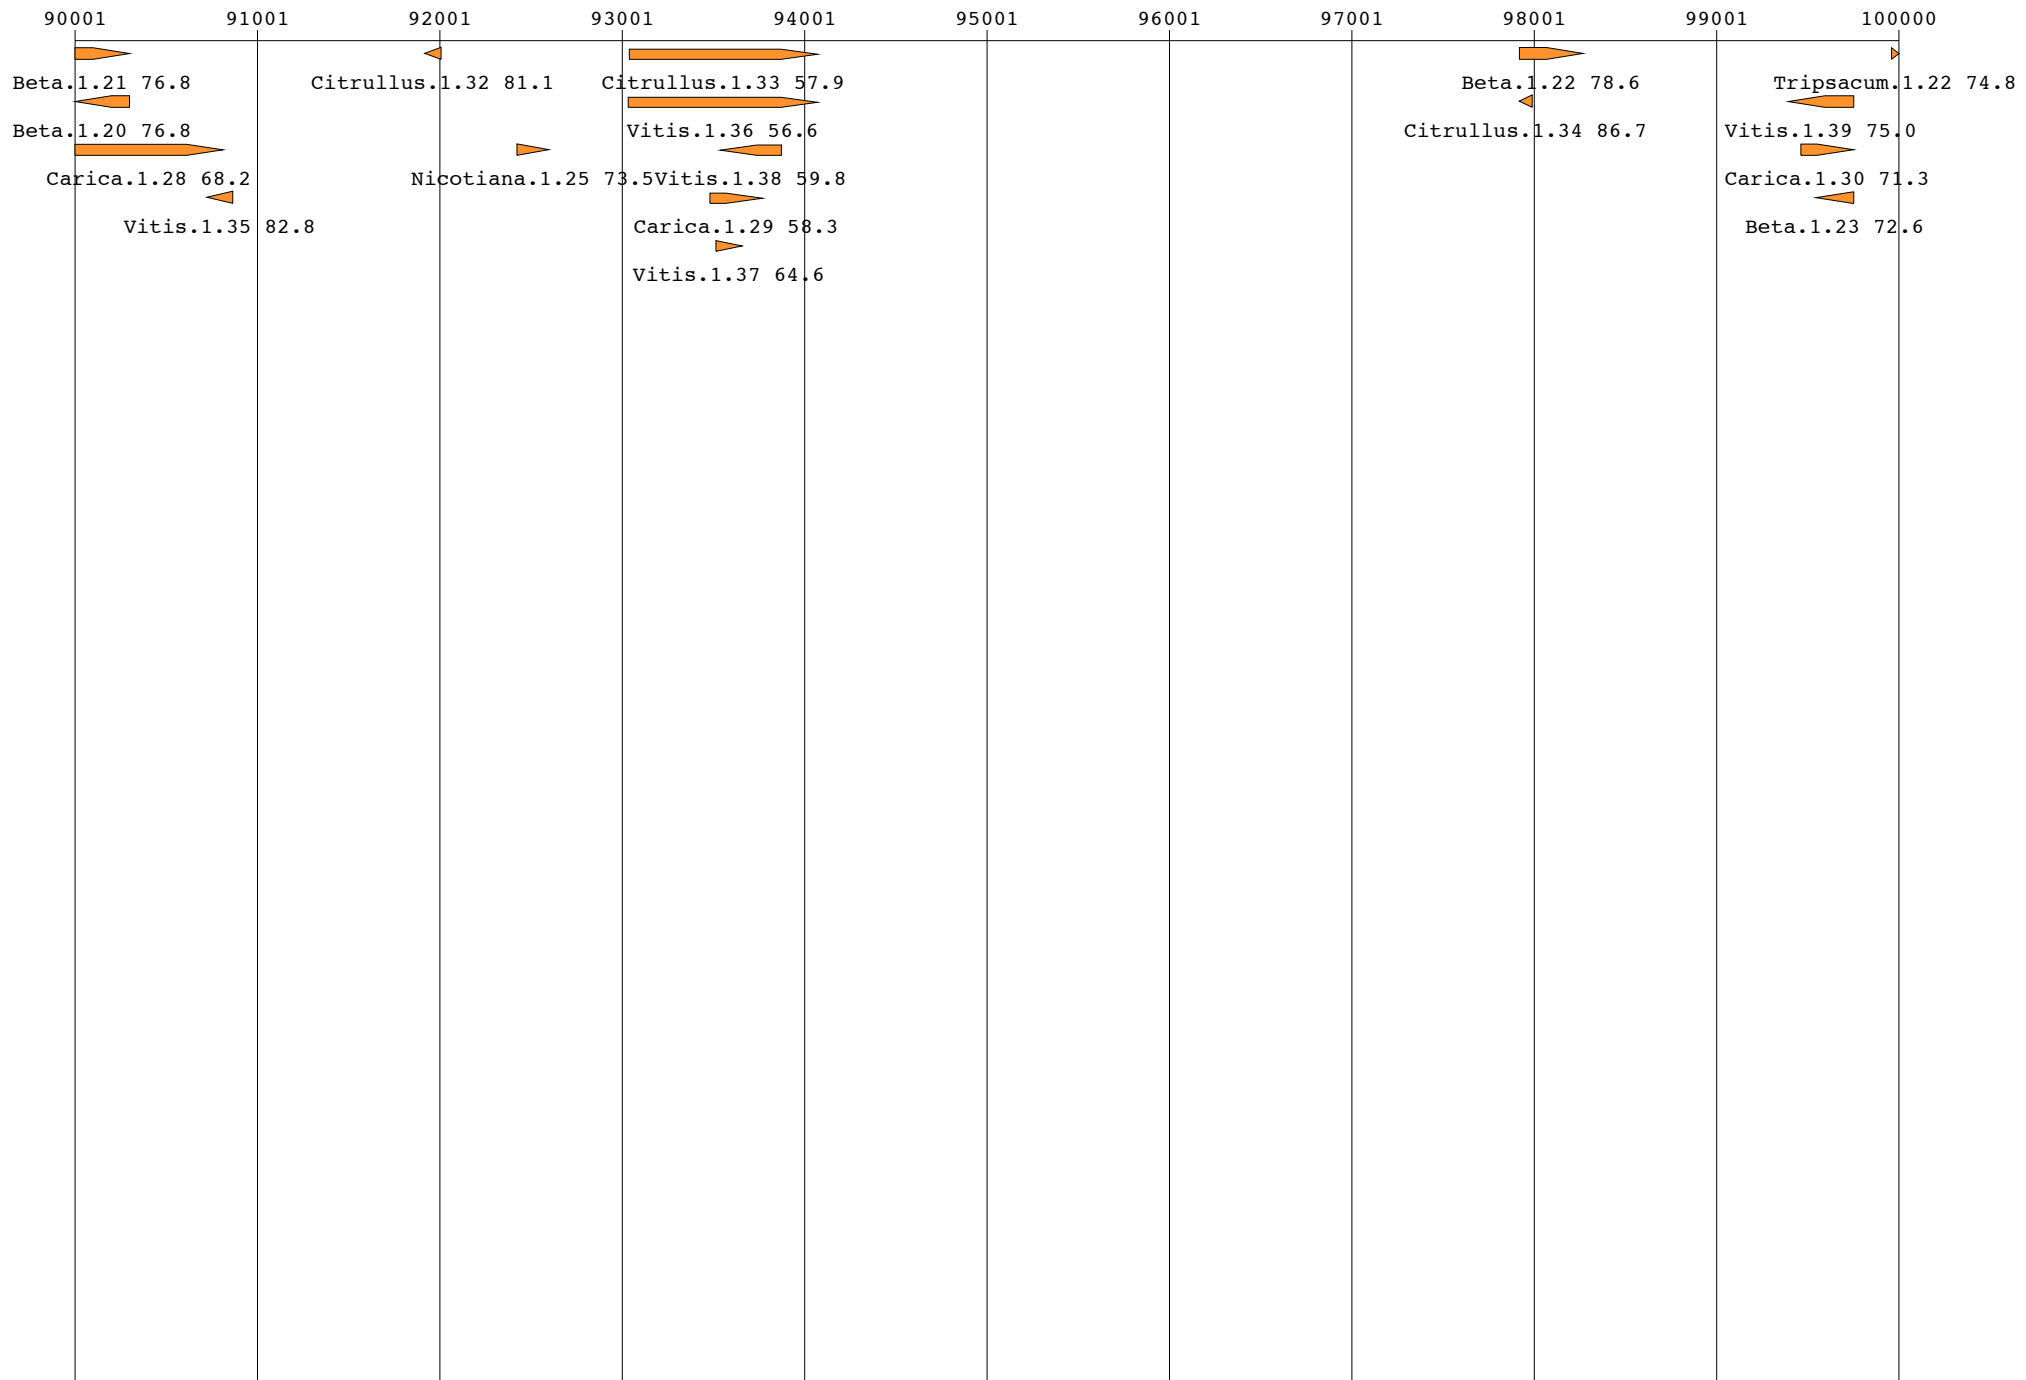

sequence: Cucurbita length: 982833

100001 101001 102001 103001 104001 105001 106001 107001 108001 109001 110000

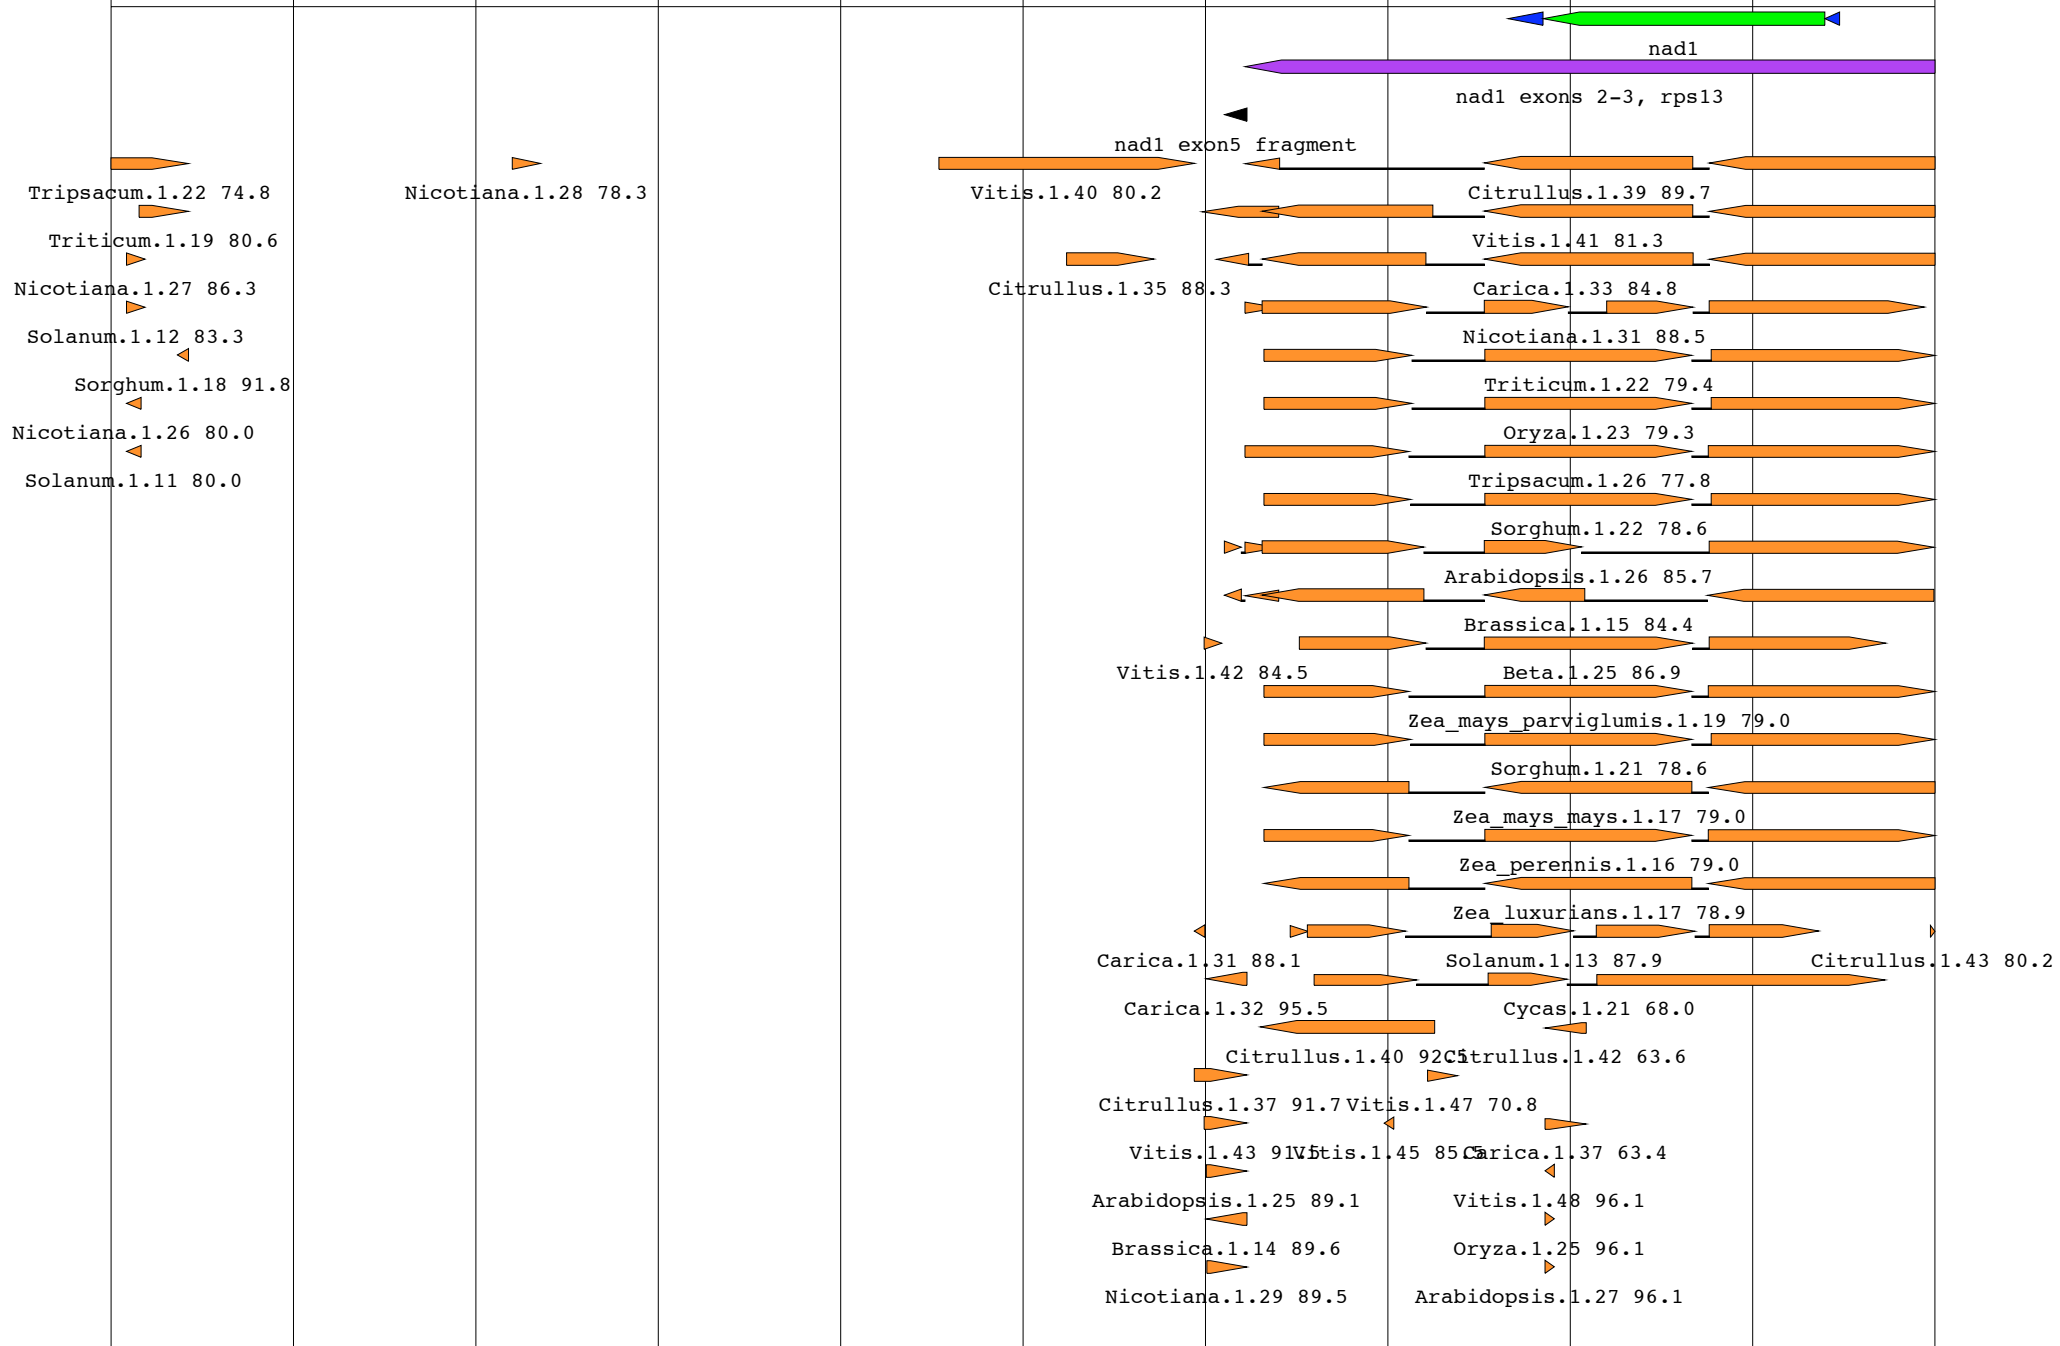

sequence: Cucurbita length: 982833

110001 111001 112001 113001 114001 115001 116001 117001 118001 119001 120000

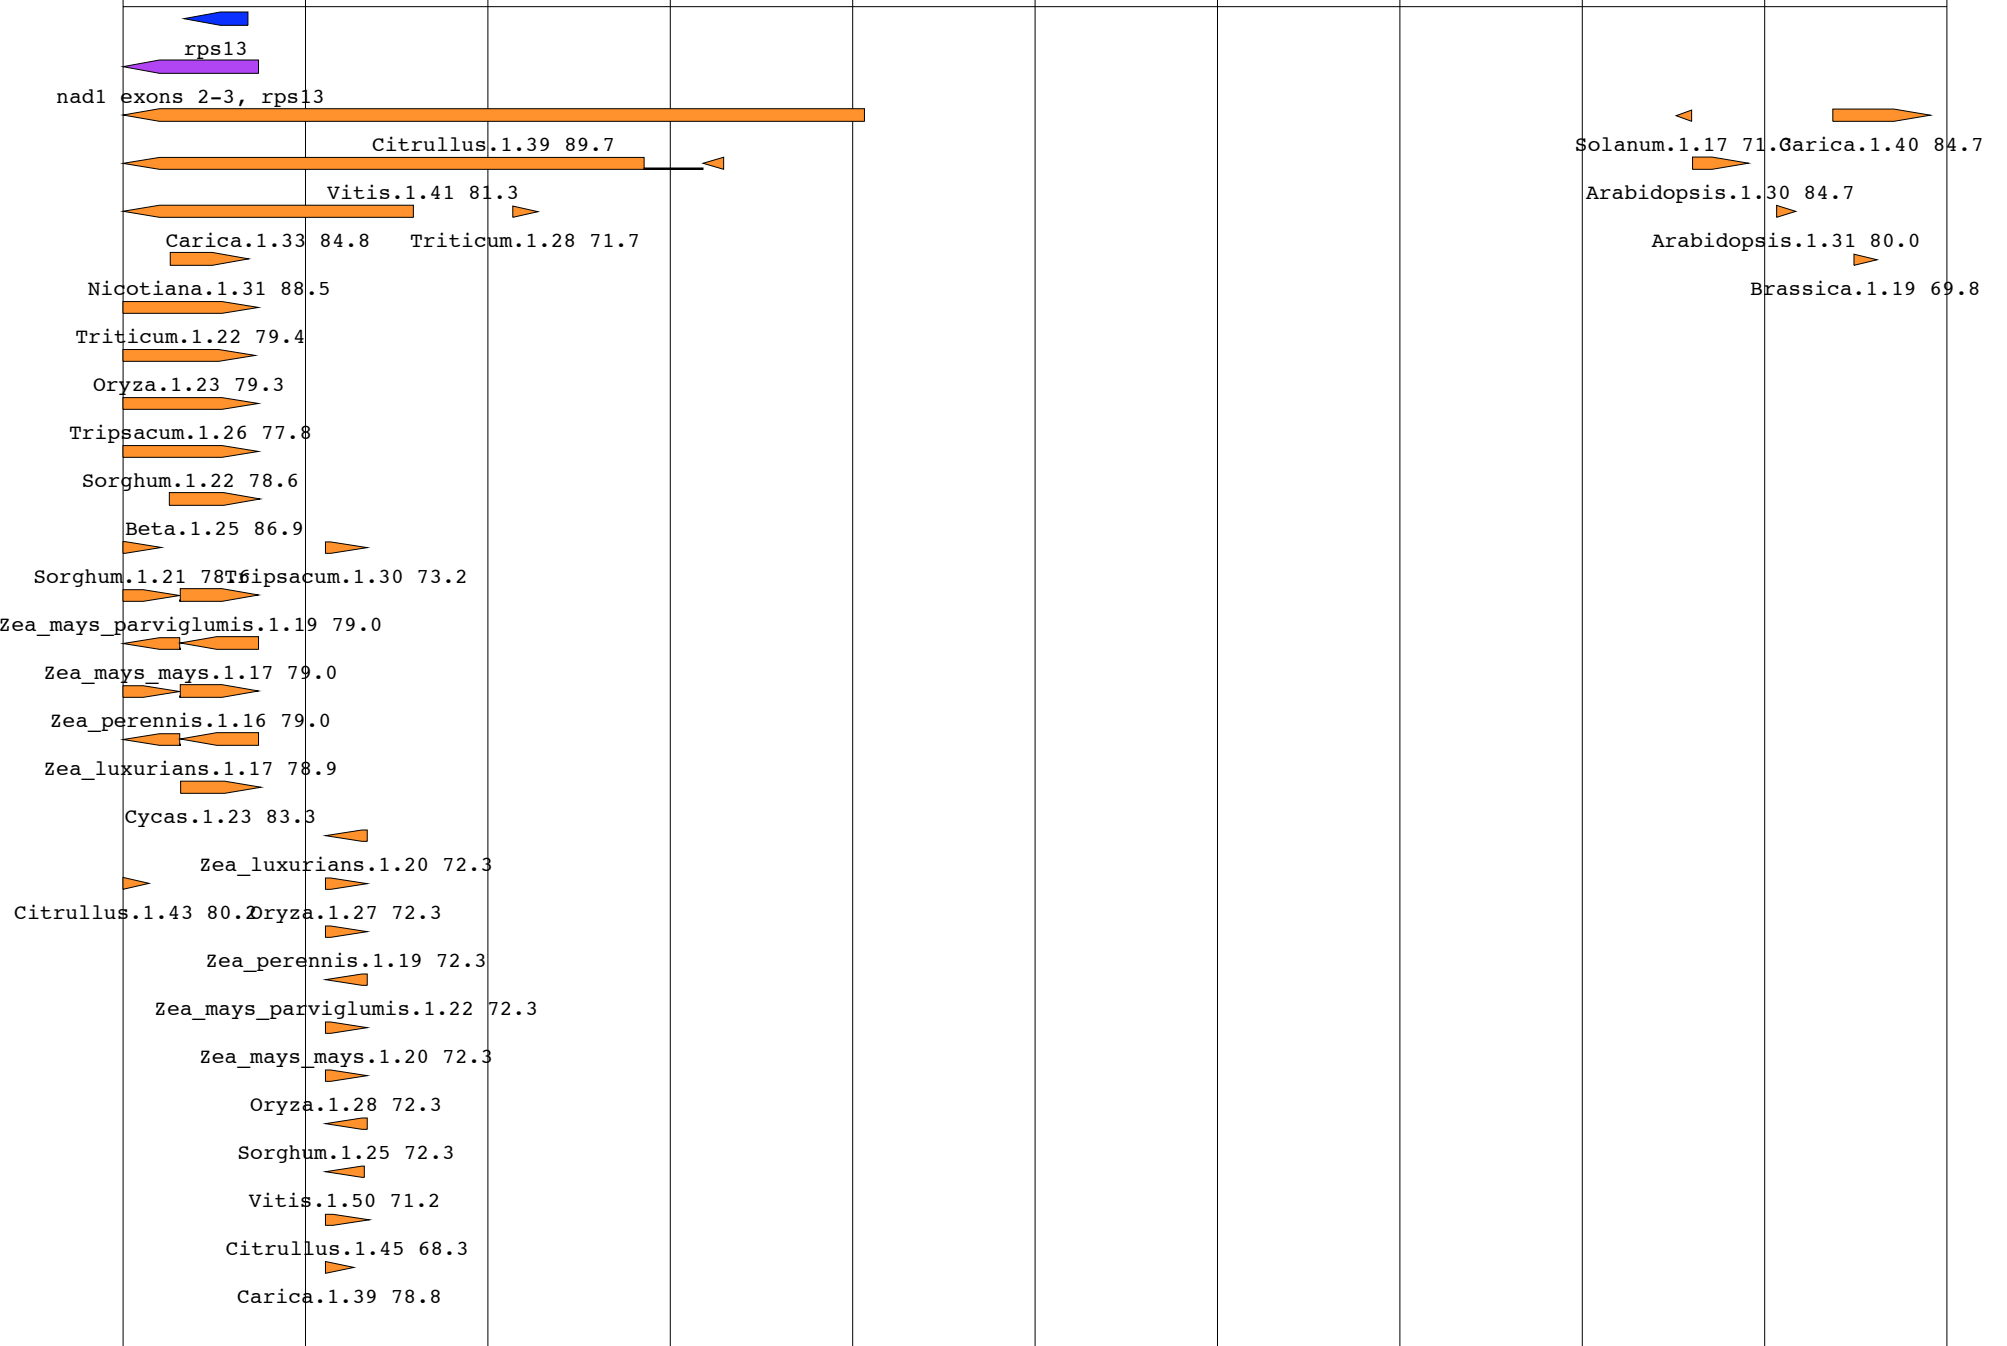

sequence: Cucurbita length: 982833

120001 121001 122001 123001 124001 125001 126001 127001 128001 129001 130000

Nicotiana.1.41 95.5

Nicotiana.1.42 95.5

Vitis.1.51 73.9

Triticum.1.29 58.5 Carica.1.42 96.4 Citrullus.1.49 77.1

Citrullus.1.46 59.1

Citrullus.1.51 78.2

Beta.1.32 57.2 Beta\_perennis.1.20 89.1 Citrullus.1.50 78.6

Carica.1.41 56.0

Citrullus.1.48 71.9

Beta.1.31 65.2

Citrullus.1.52 72.3

Beta.1.30 65.2

Citrullus.1.55 76.4

Nicotiana.1.43 69.4

Citrullus.1.56 72.0

Citrullus.1.53 73.0

Citrullus.1.54 78.5

Citrullus.1.57 73.9

sequence: Cucurbita length: 982833

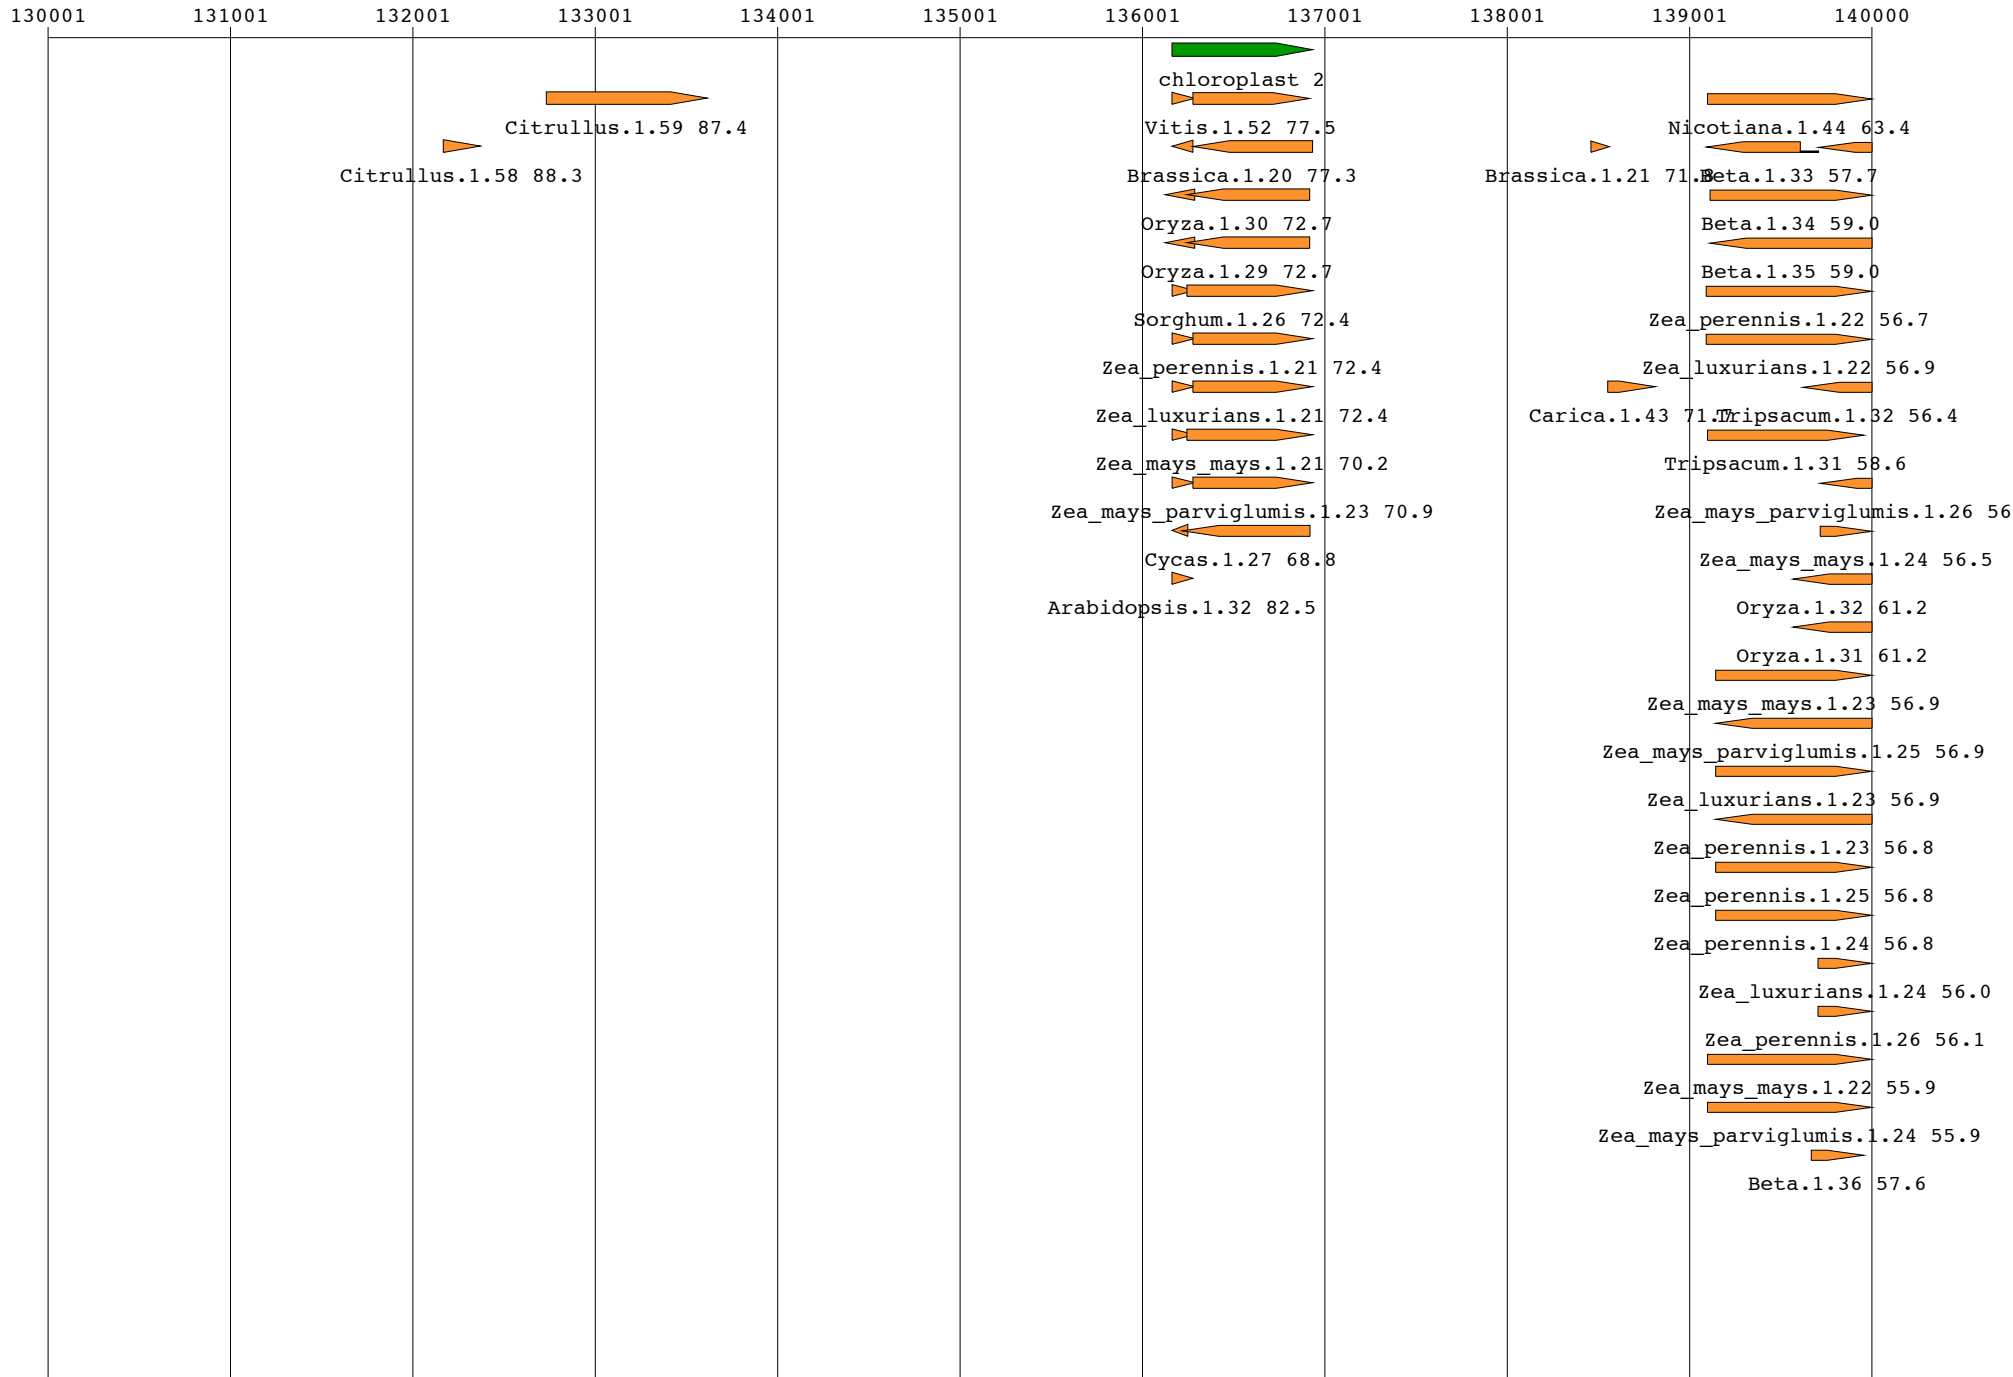

sequence: Cucurbita length: 982833

140001 141001 142001 143001 144001 145001 146001 147001 148001 149001 150000

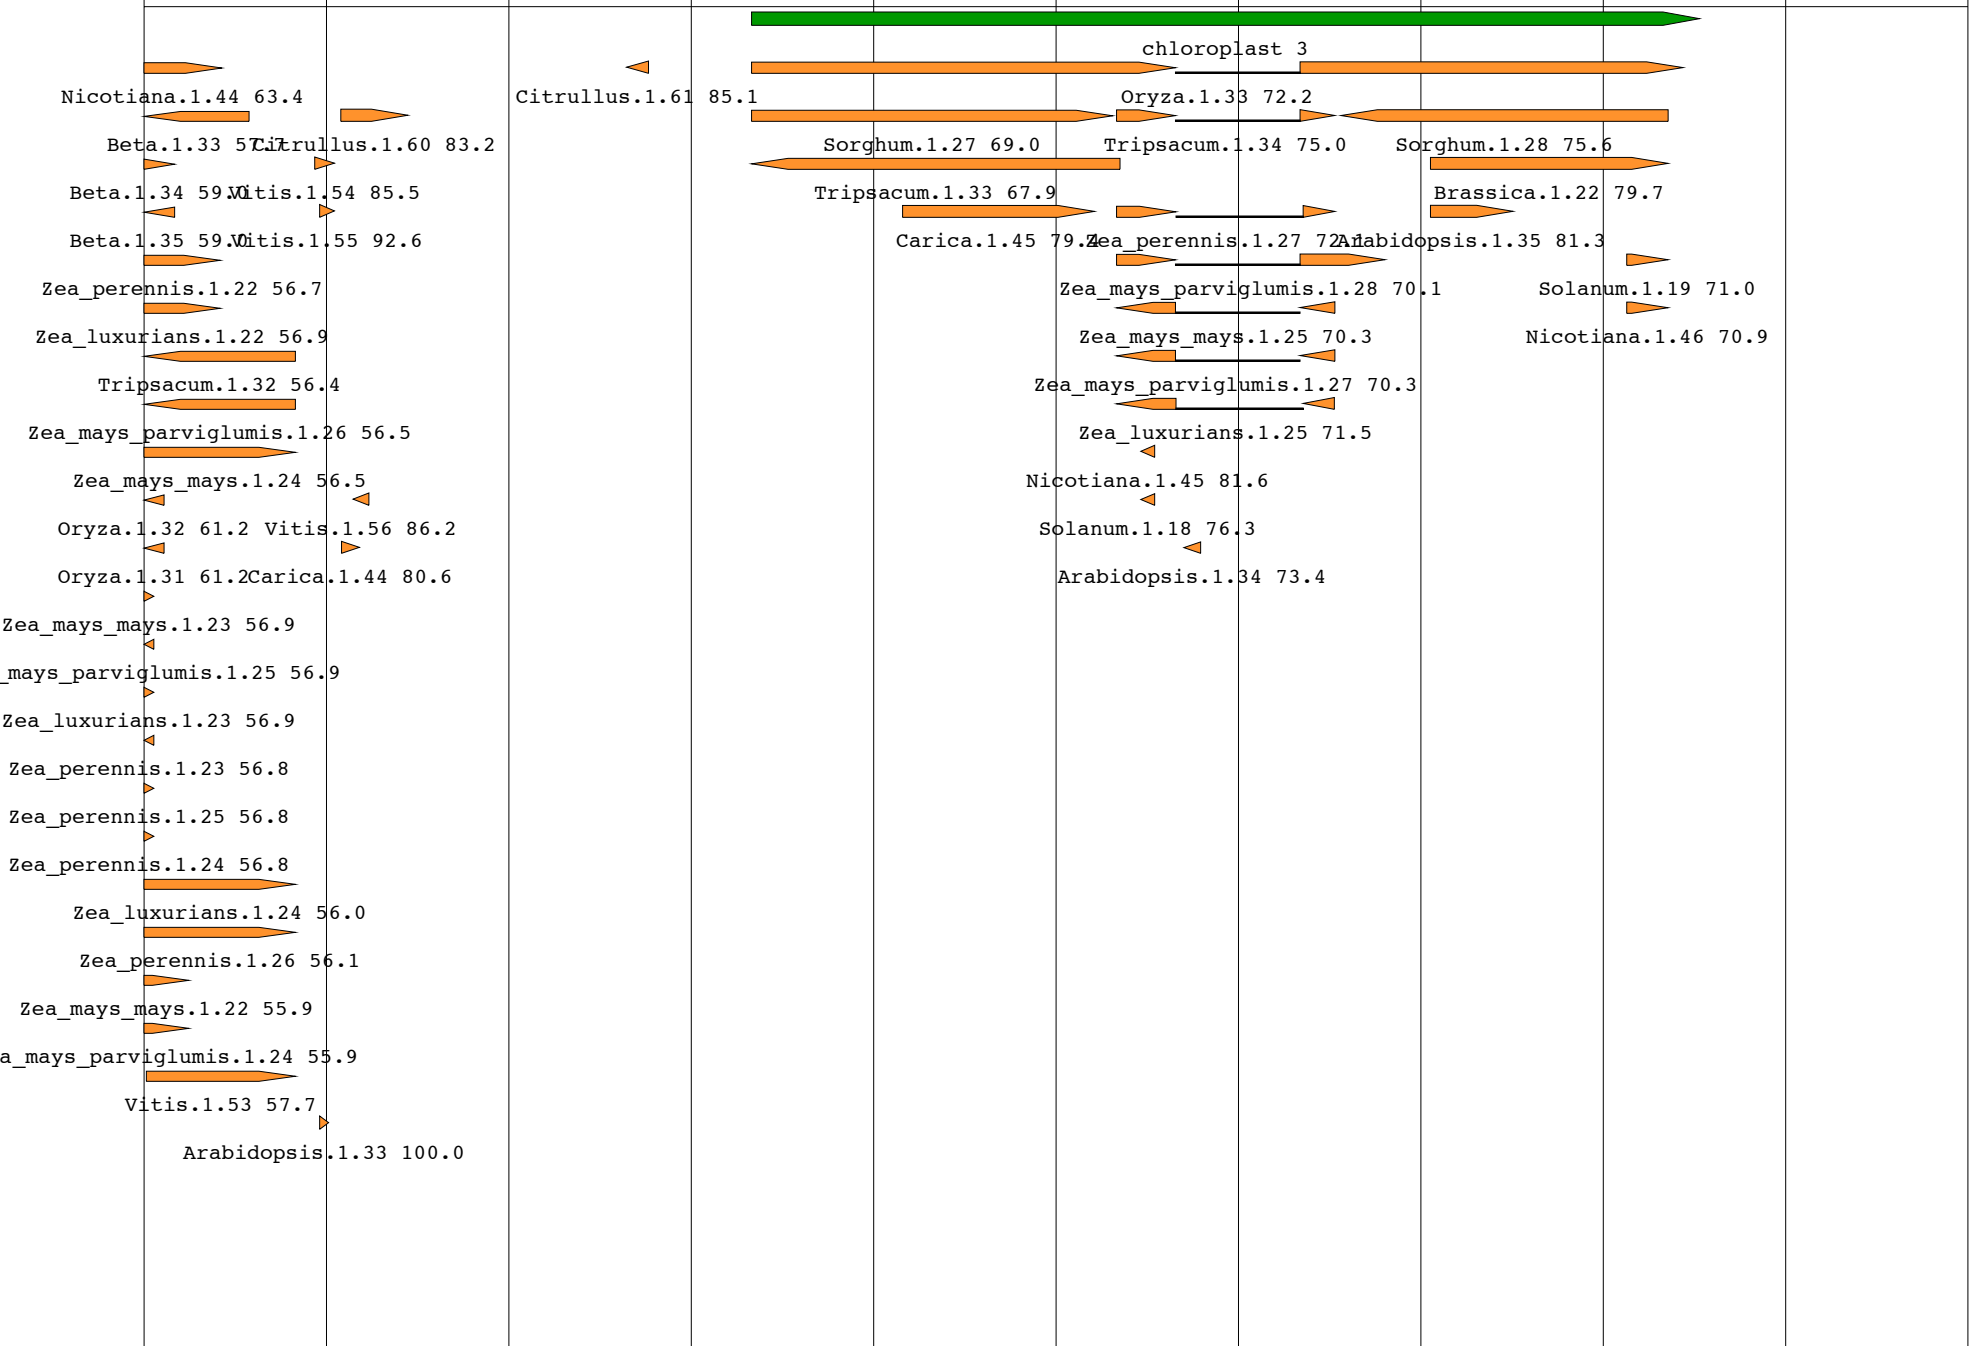

sequence: Cucurbita length: 982833

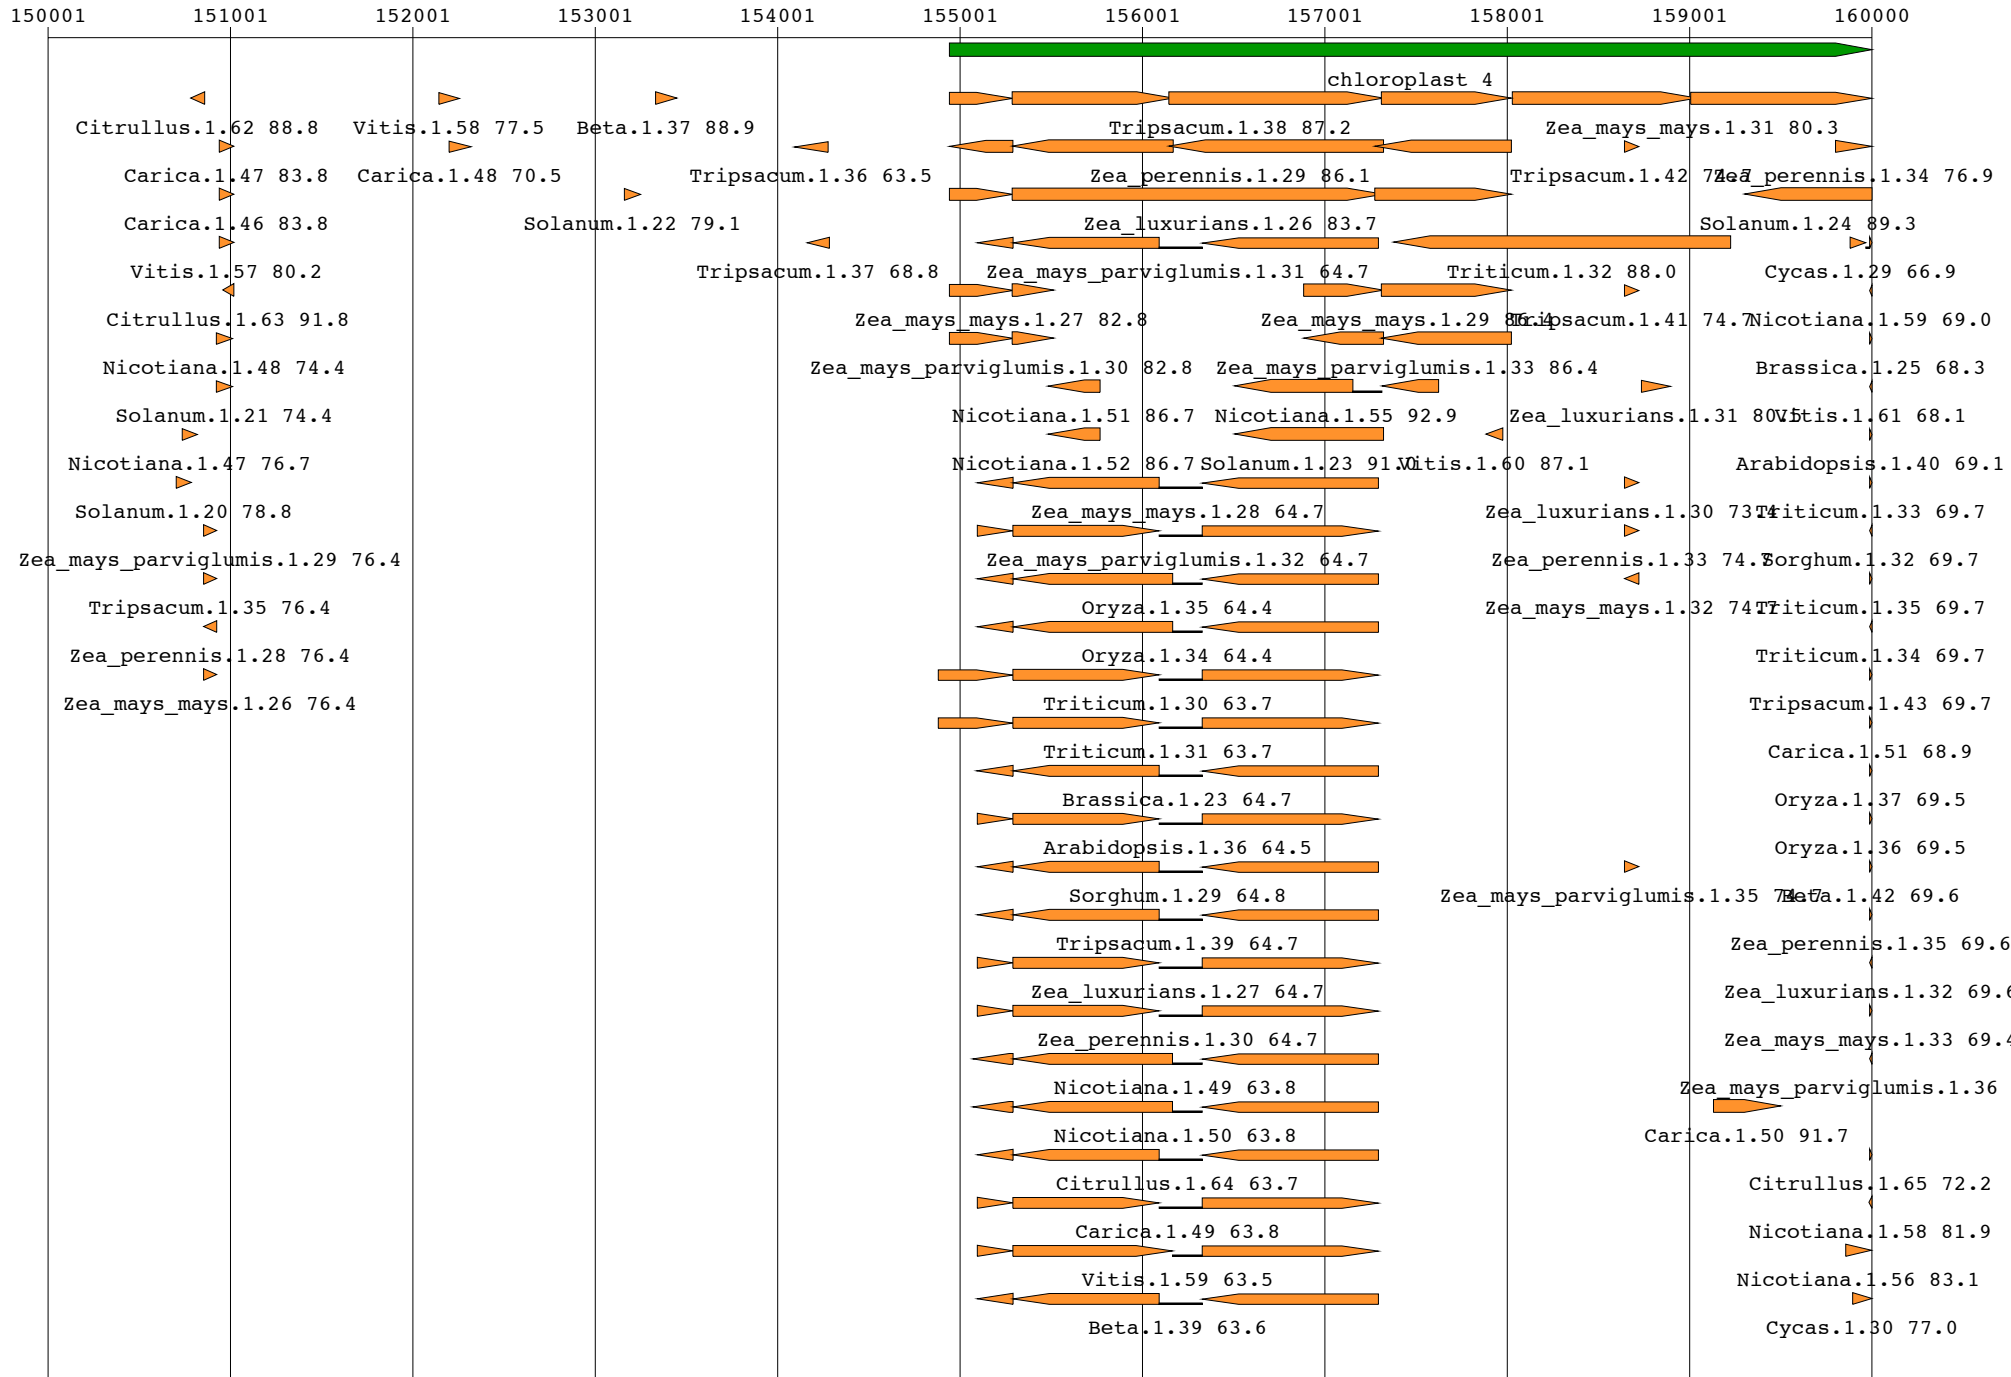



sequence: Cucurbita length: 982833

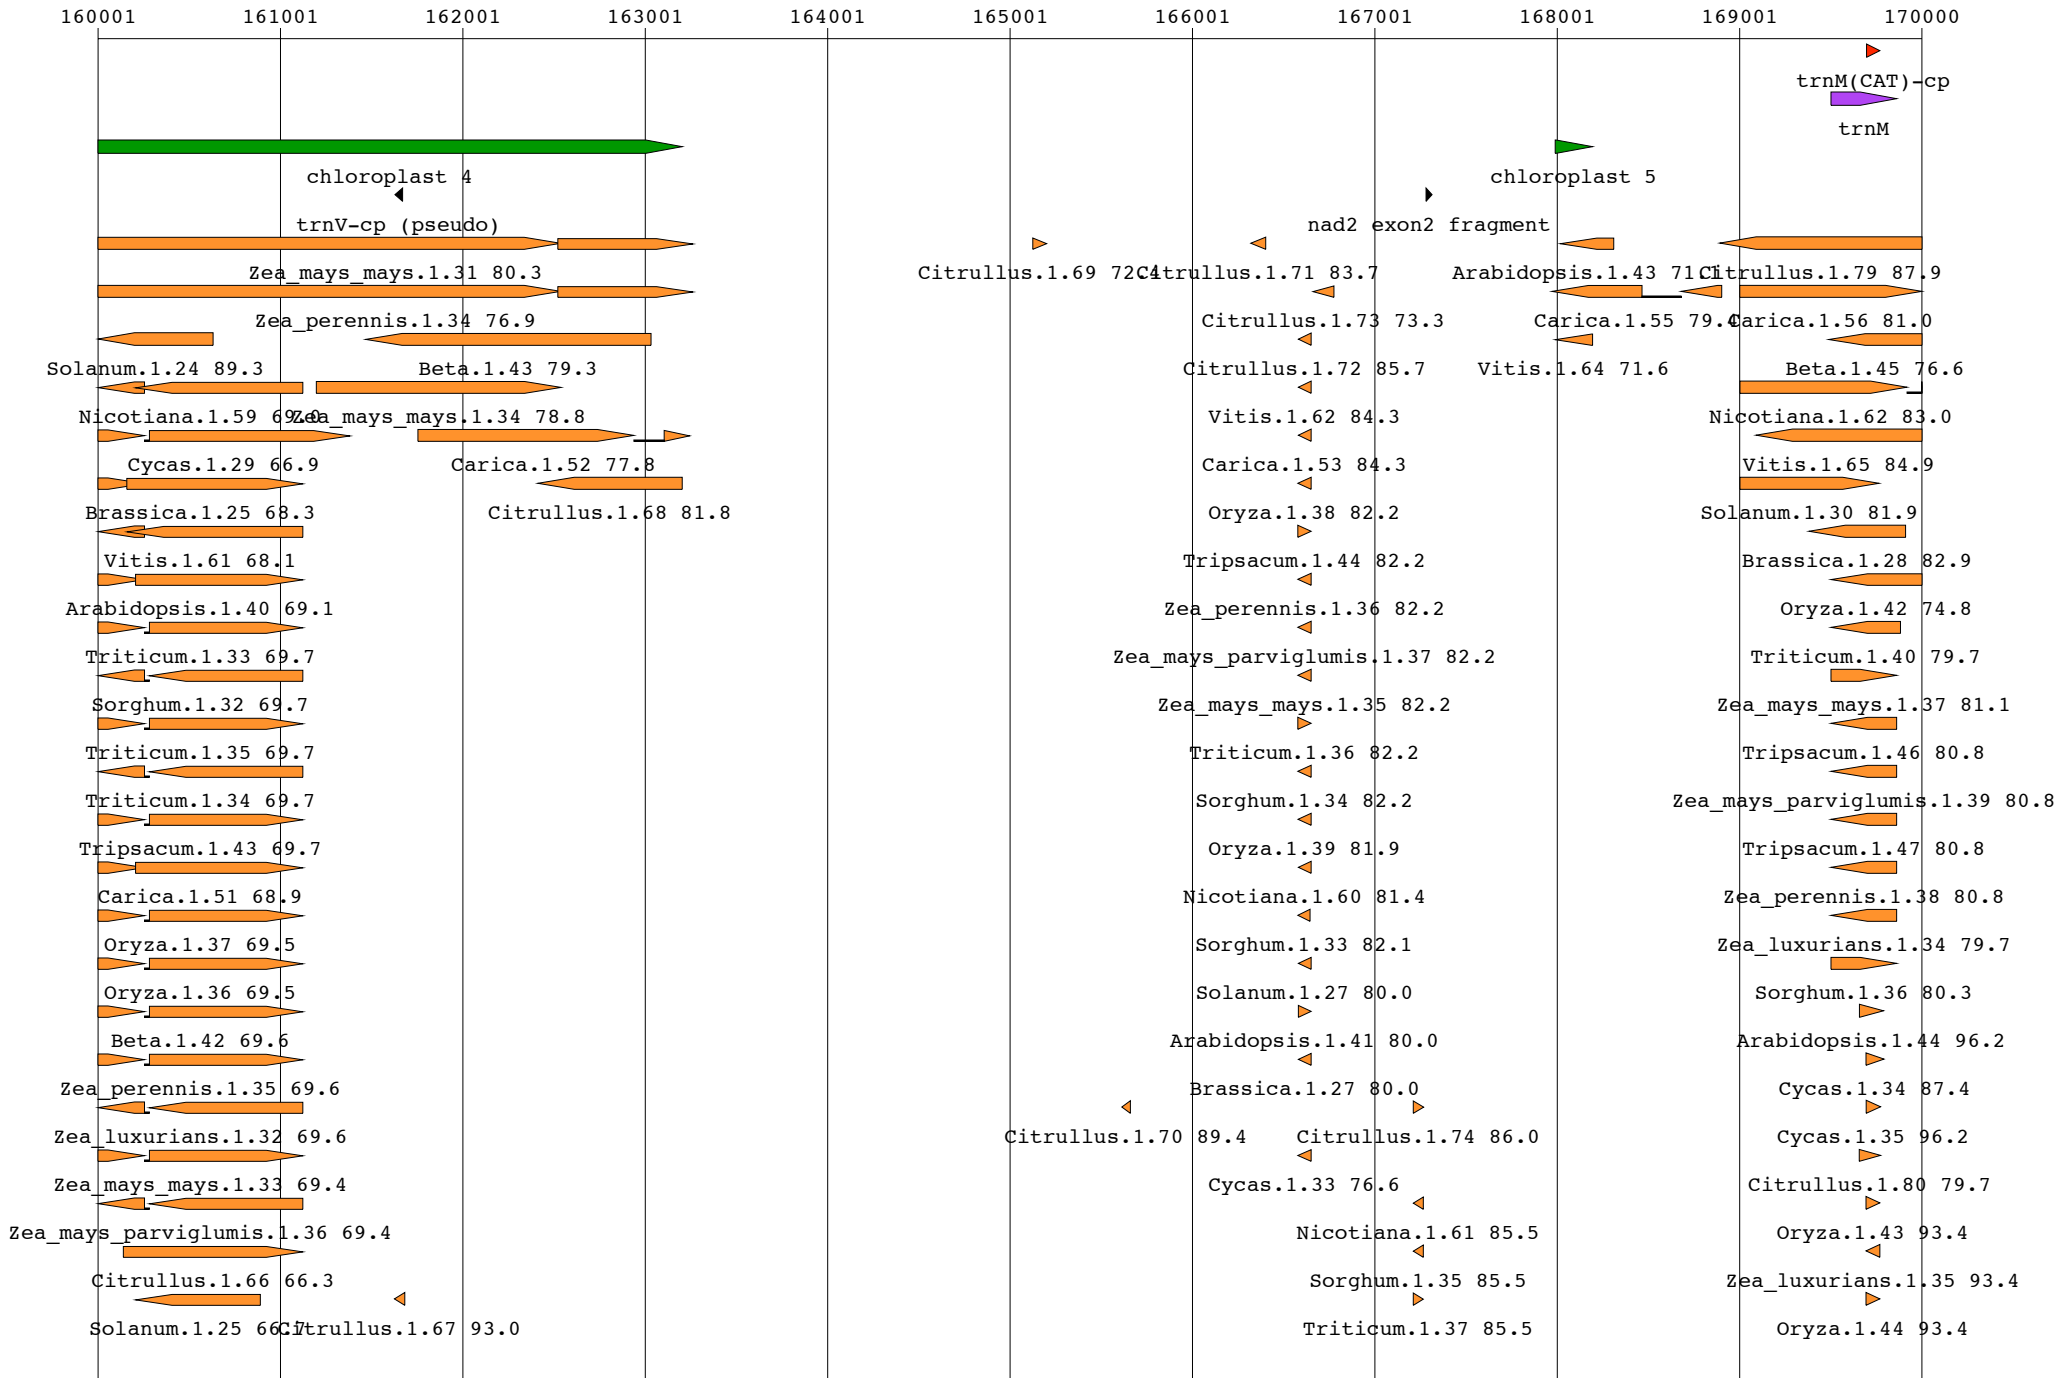

sequence: Cucurbita length: 982833

170001 171001 172001 173001 174001 175001 176001 177001 178001 179001 180000

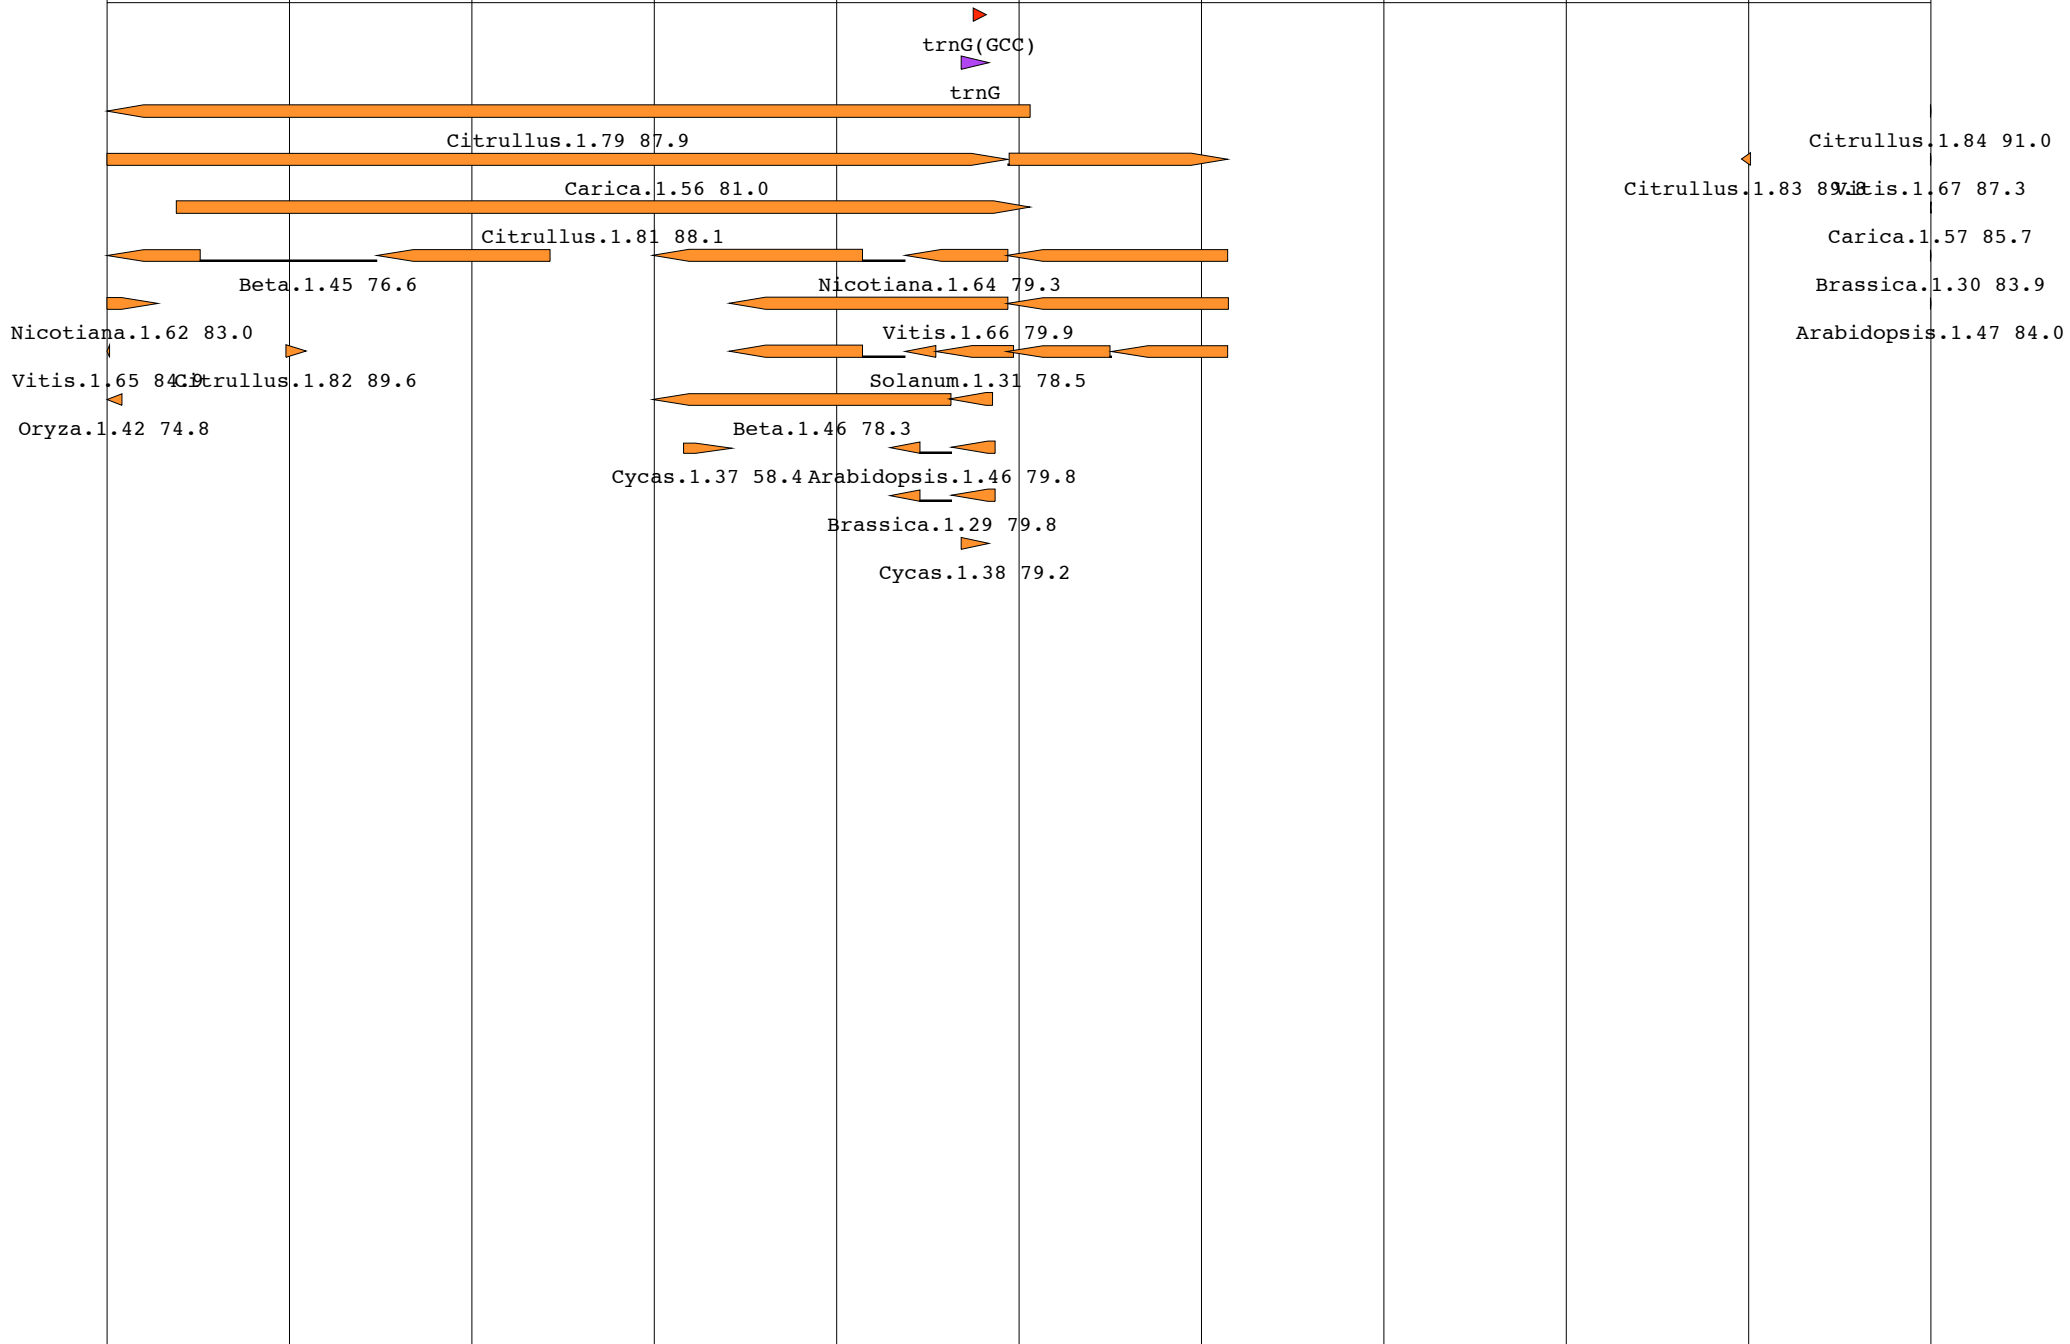

sequence: Cucurbita length: 982833

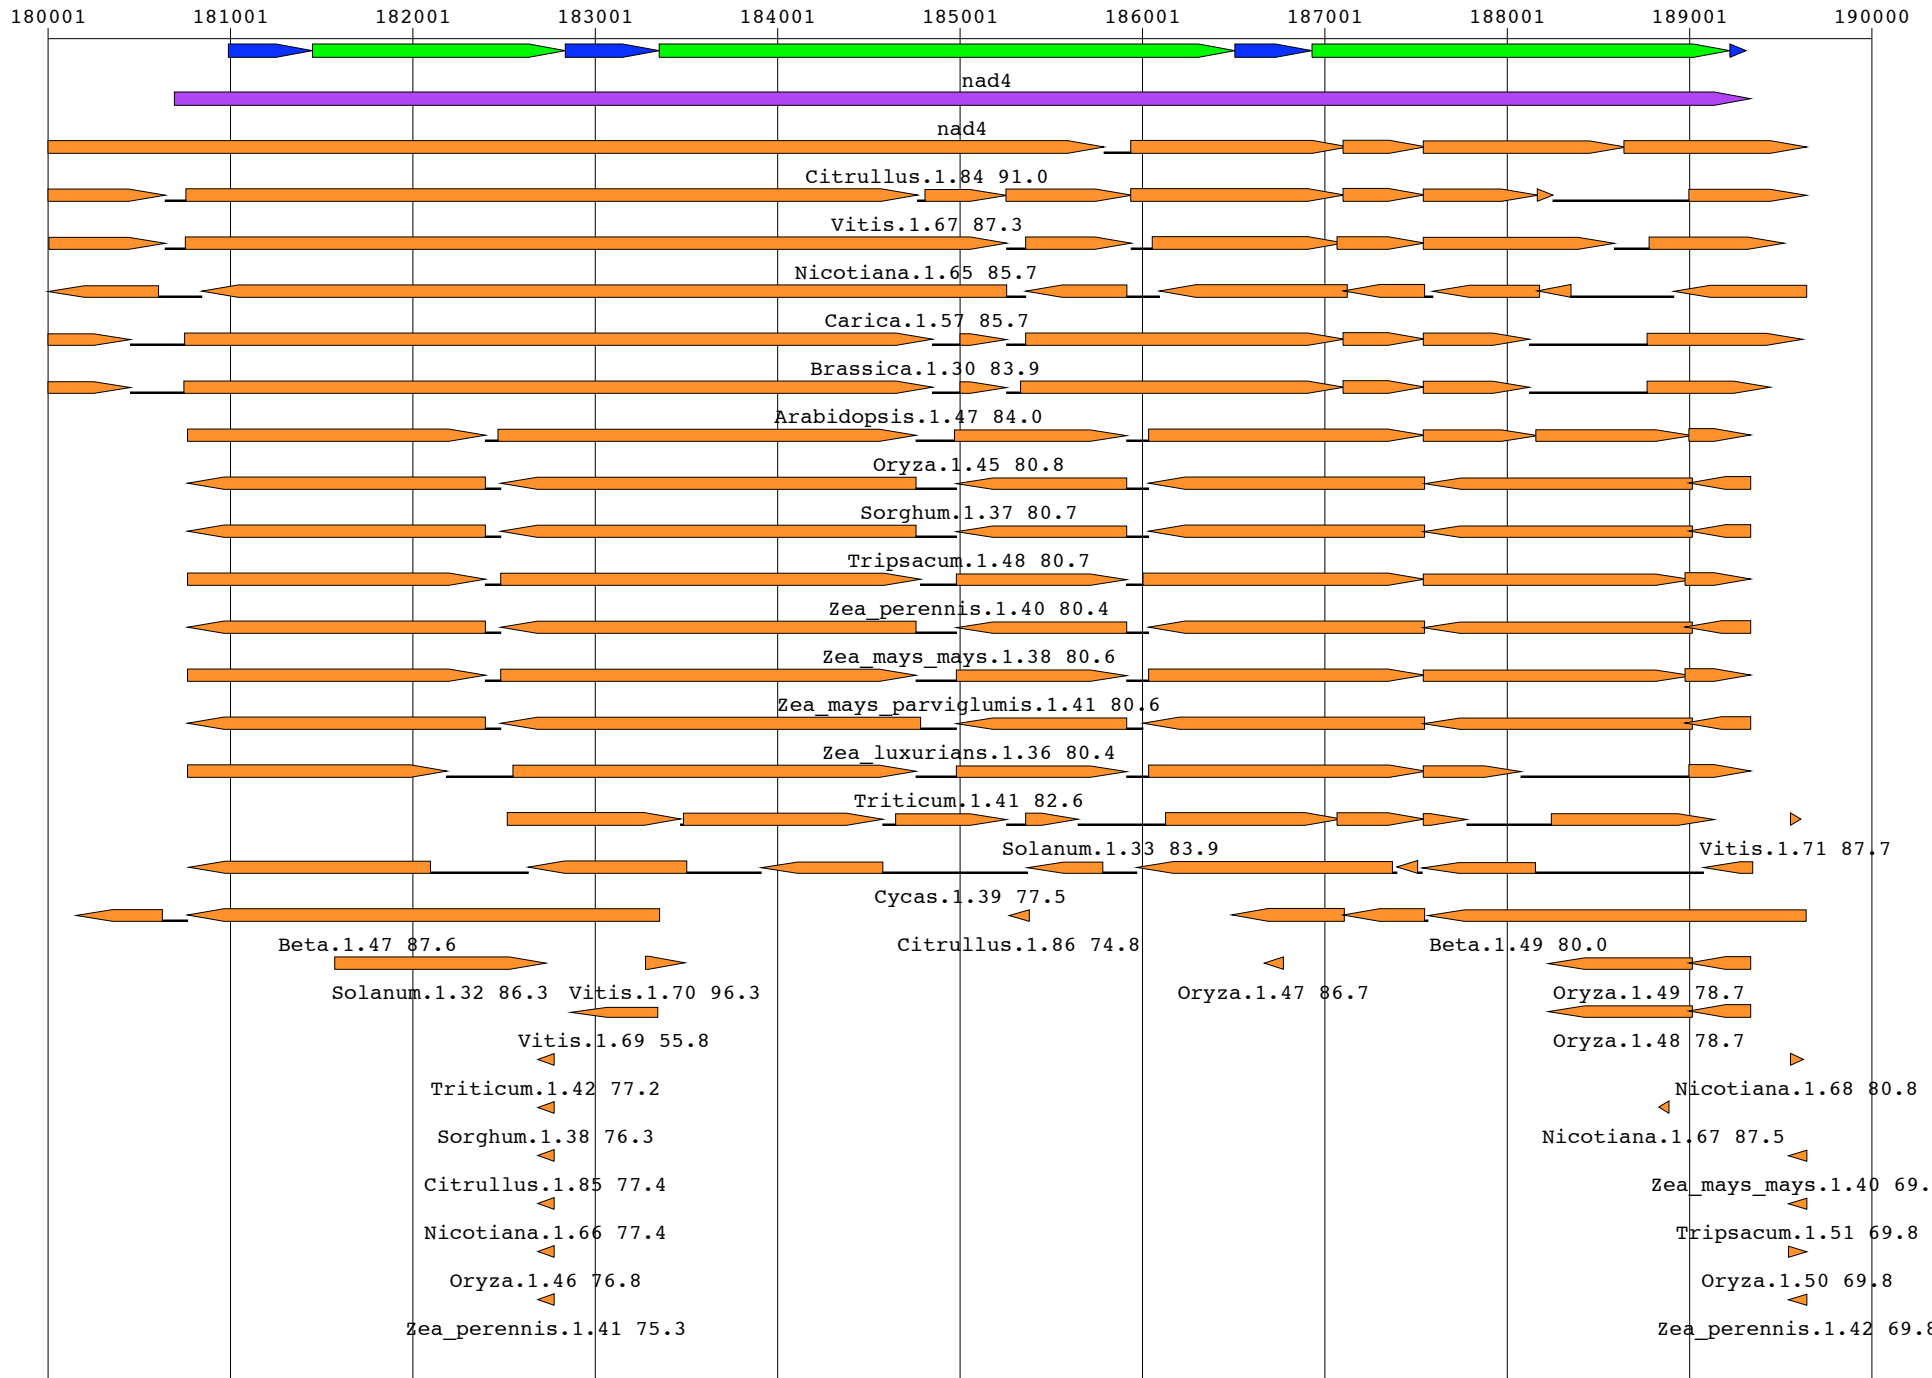

sequence: Cucurbita length: 982833

190001 191001 192001 193001 194001 195001 196001 197001 198001 199001 200000

Citrullus.1.87 93.8

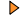

sequence: Cucurbita length: 982833

200001      201001      202001      203001      204001      205001      206001      207001      208001      209001      210000

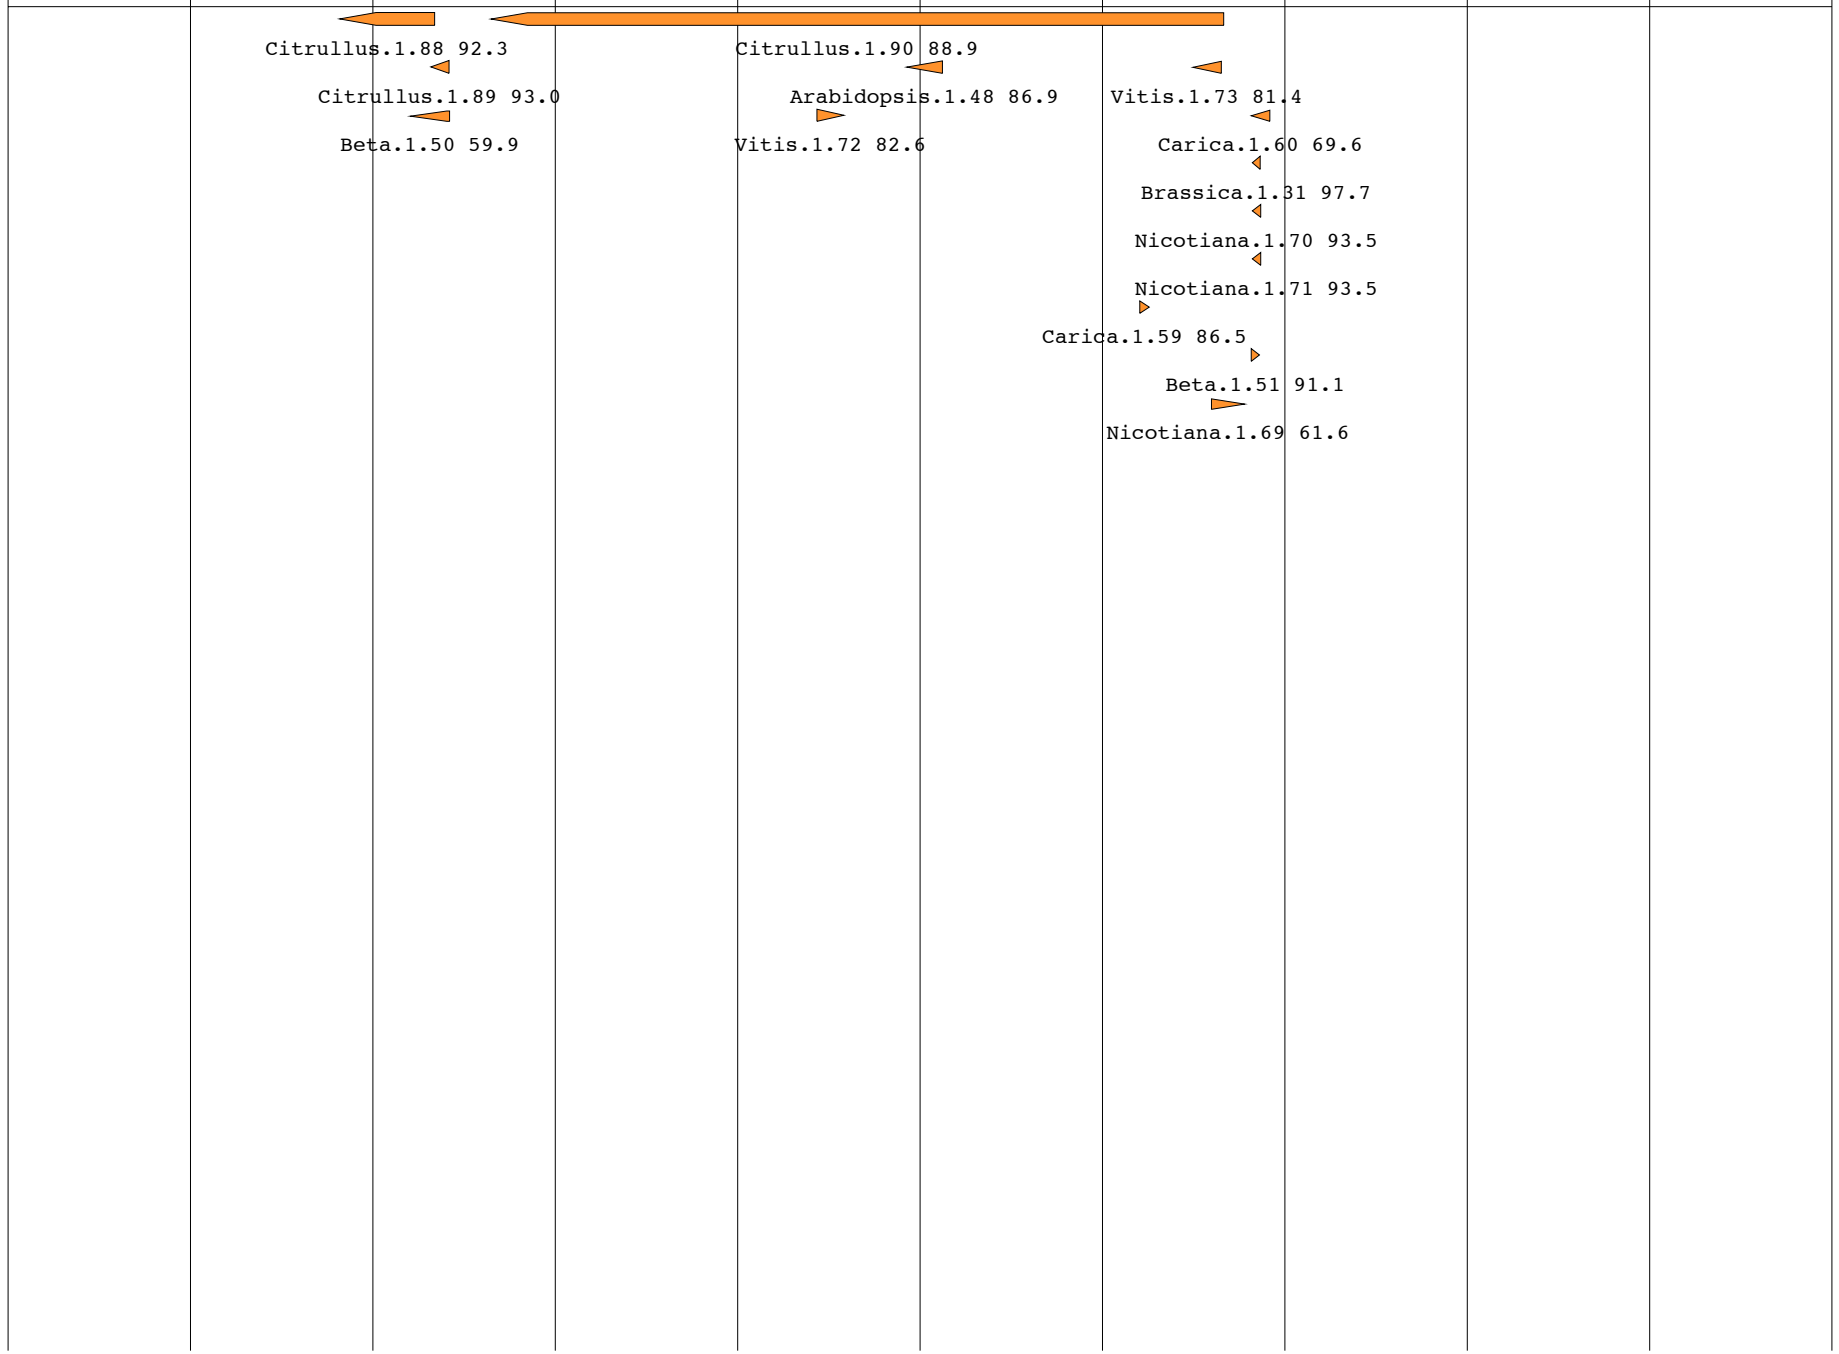

sequence: Cucurbita length: 982833

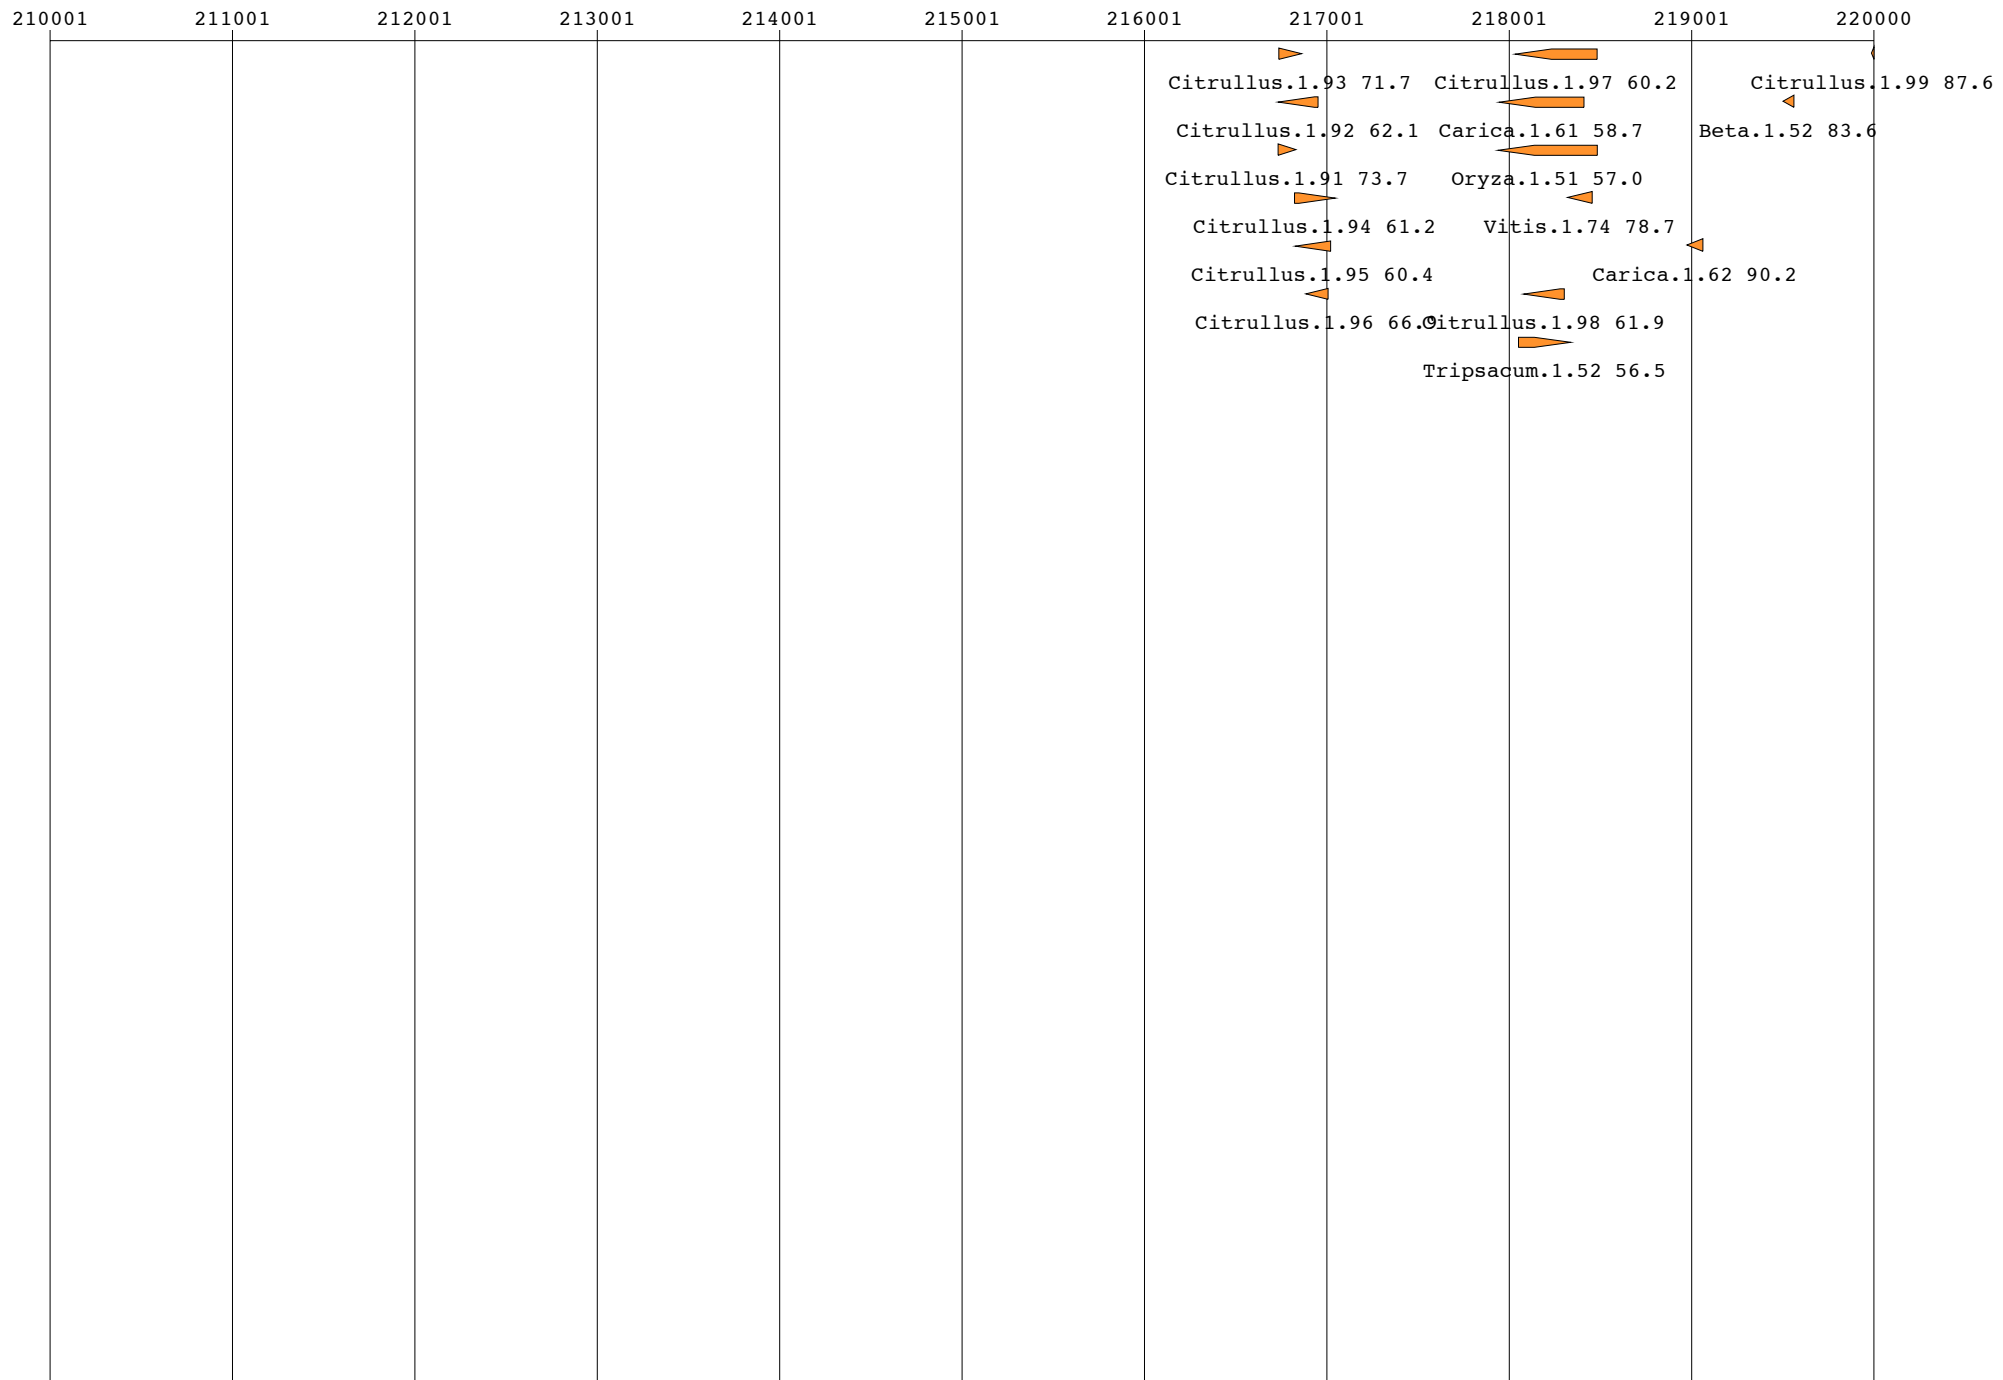

sequence: Cucurbita length: 982833

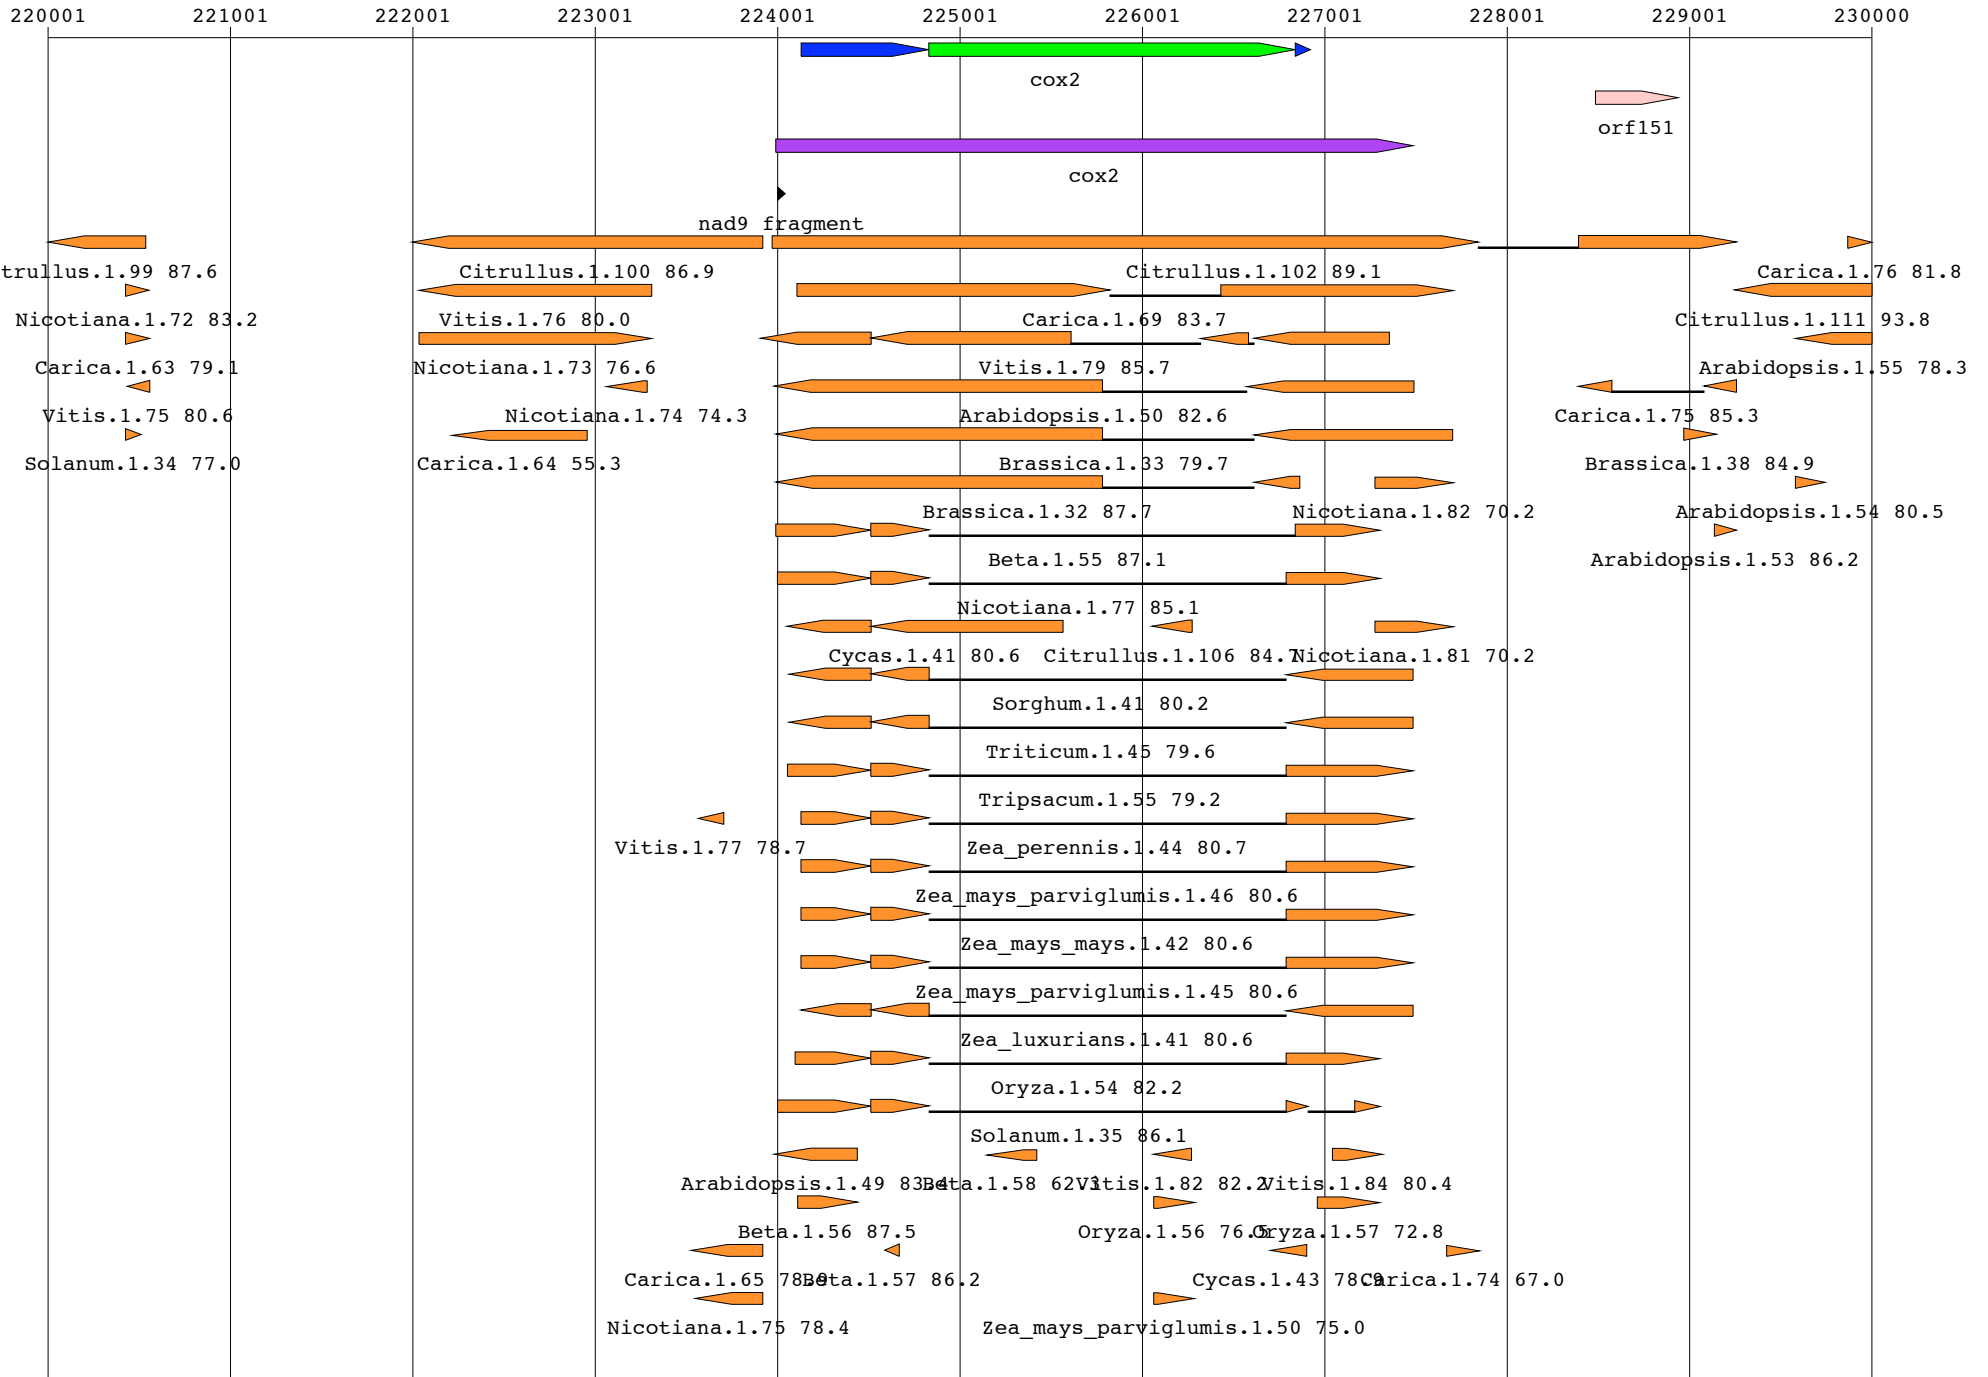

sequence: Cucurbita length: 982833

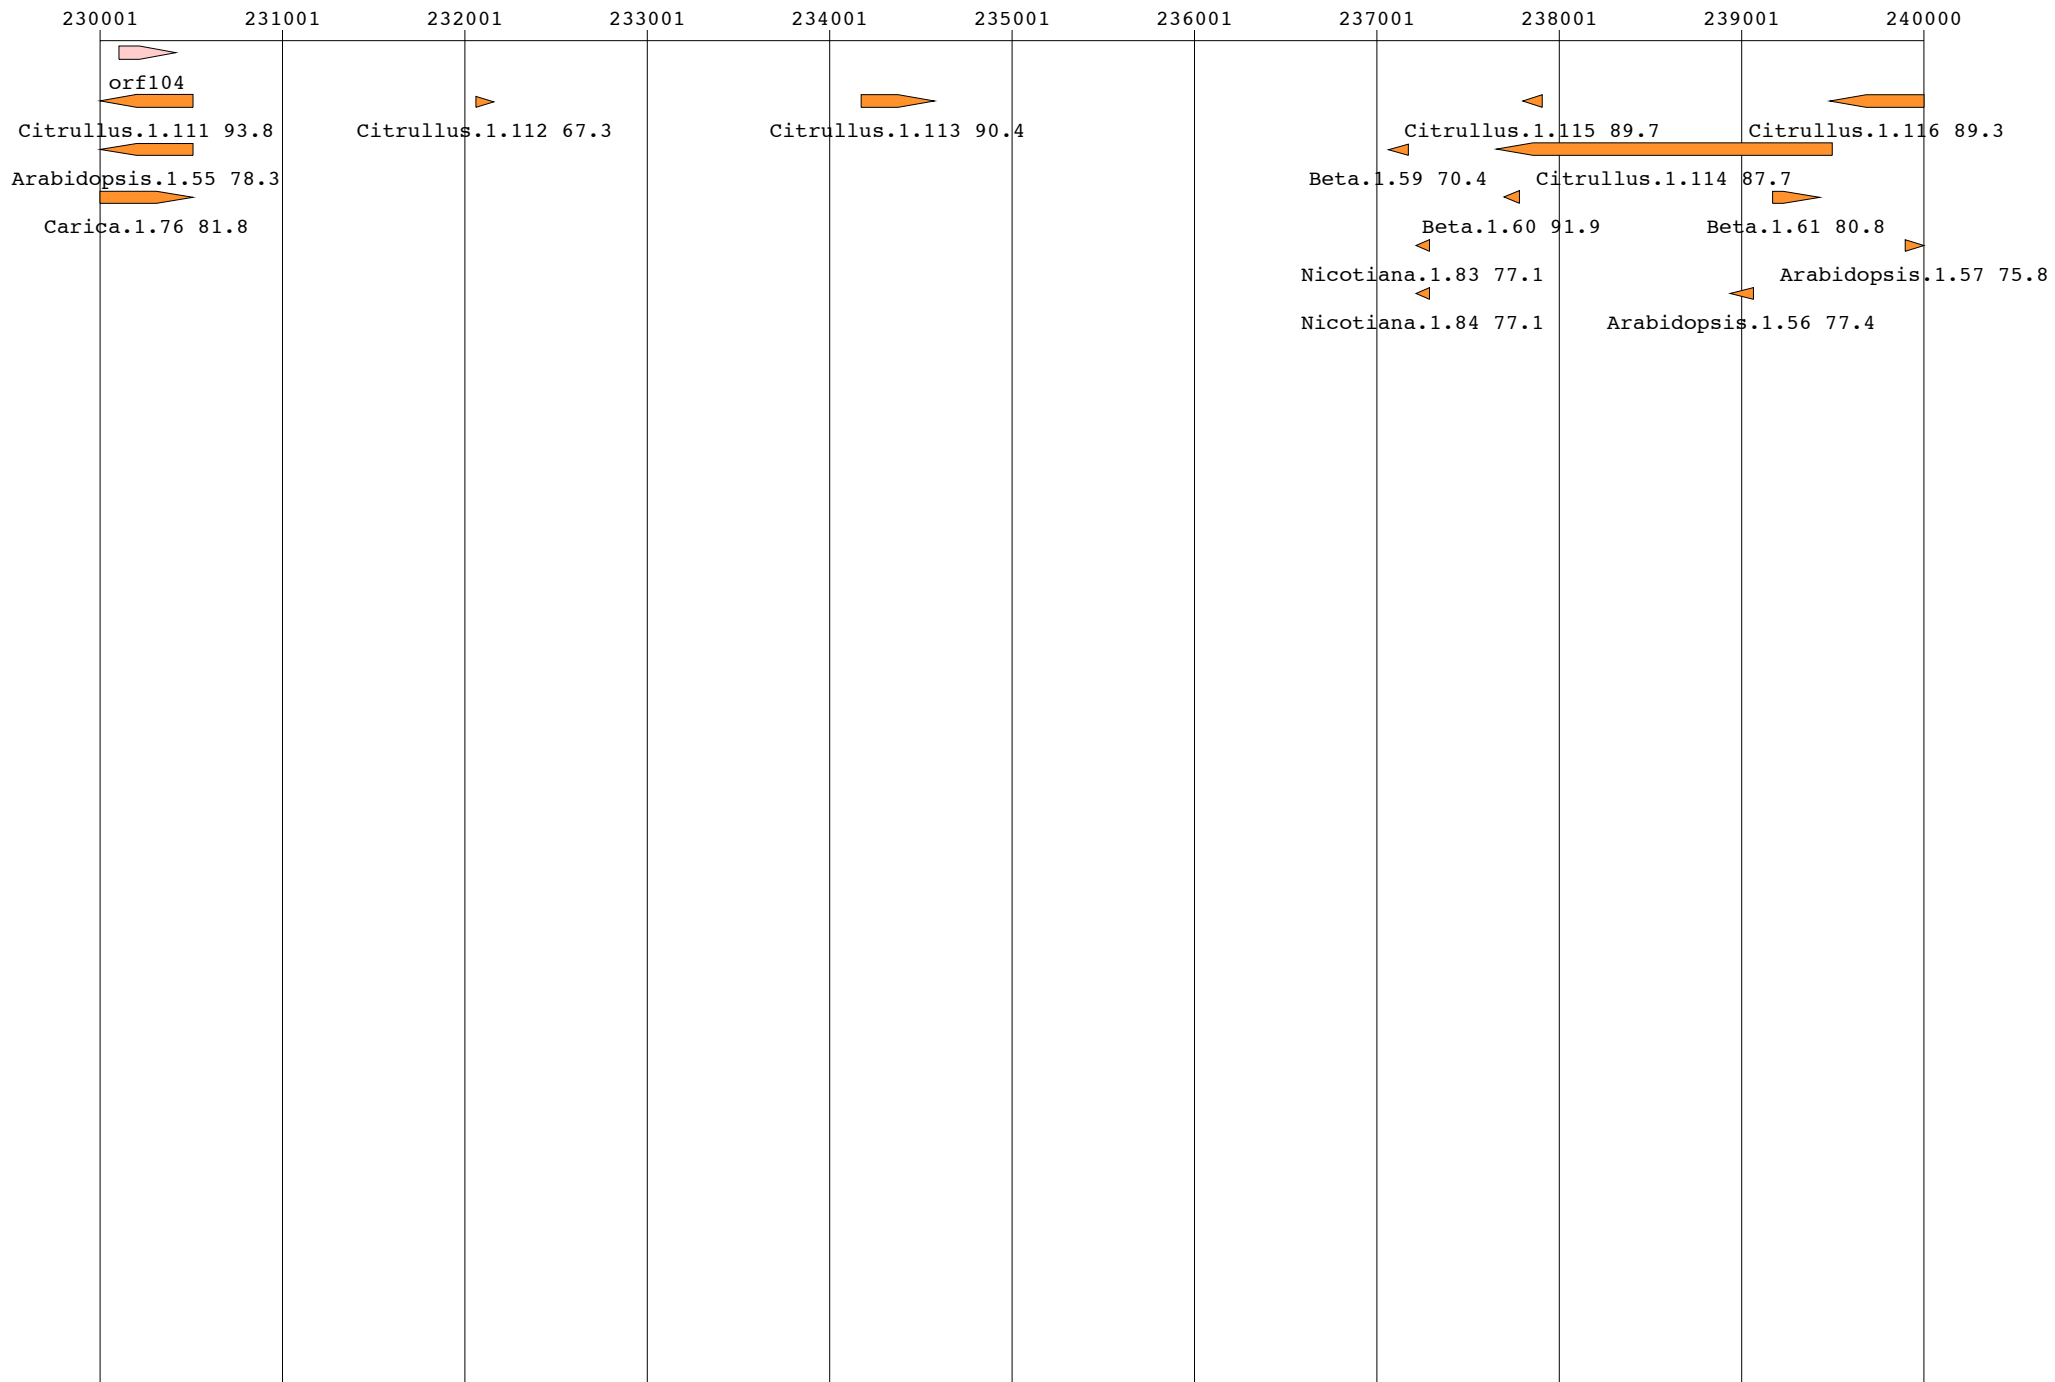



sequence: Cucurbita length: 982833

240001 241001 242001 243001 244001 245001 246001 247001 248001 249001 250000

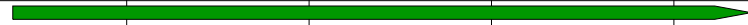

chloroplast 6

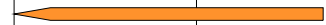

Citrullus.1.116 89.3

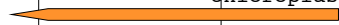

Vitis.1.87 76.4

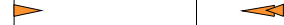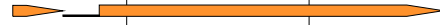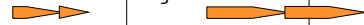

Sorghum.1.46 71.3

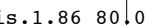

Vitis.1.86 80.0

Carica.1.77 76.4

Vitis.1.88 70.4

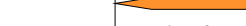

Oryza.1.59 77.7

Arabidopsis.1.57 75.8 Beta.1.62 71.9

sequence: Cucurbita length: 982833

250001      251001      252001      253001      254001      255001      256001      257001      258001      259001      260000

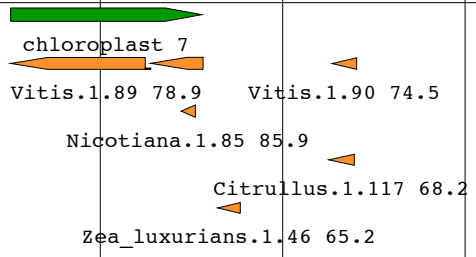

sequence: Cucurbita length: 982833

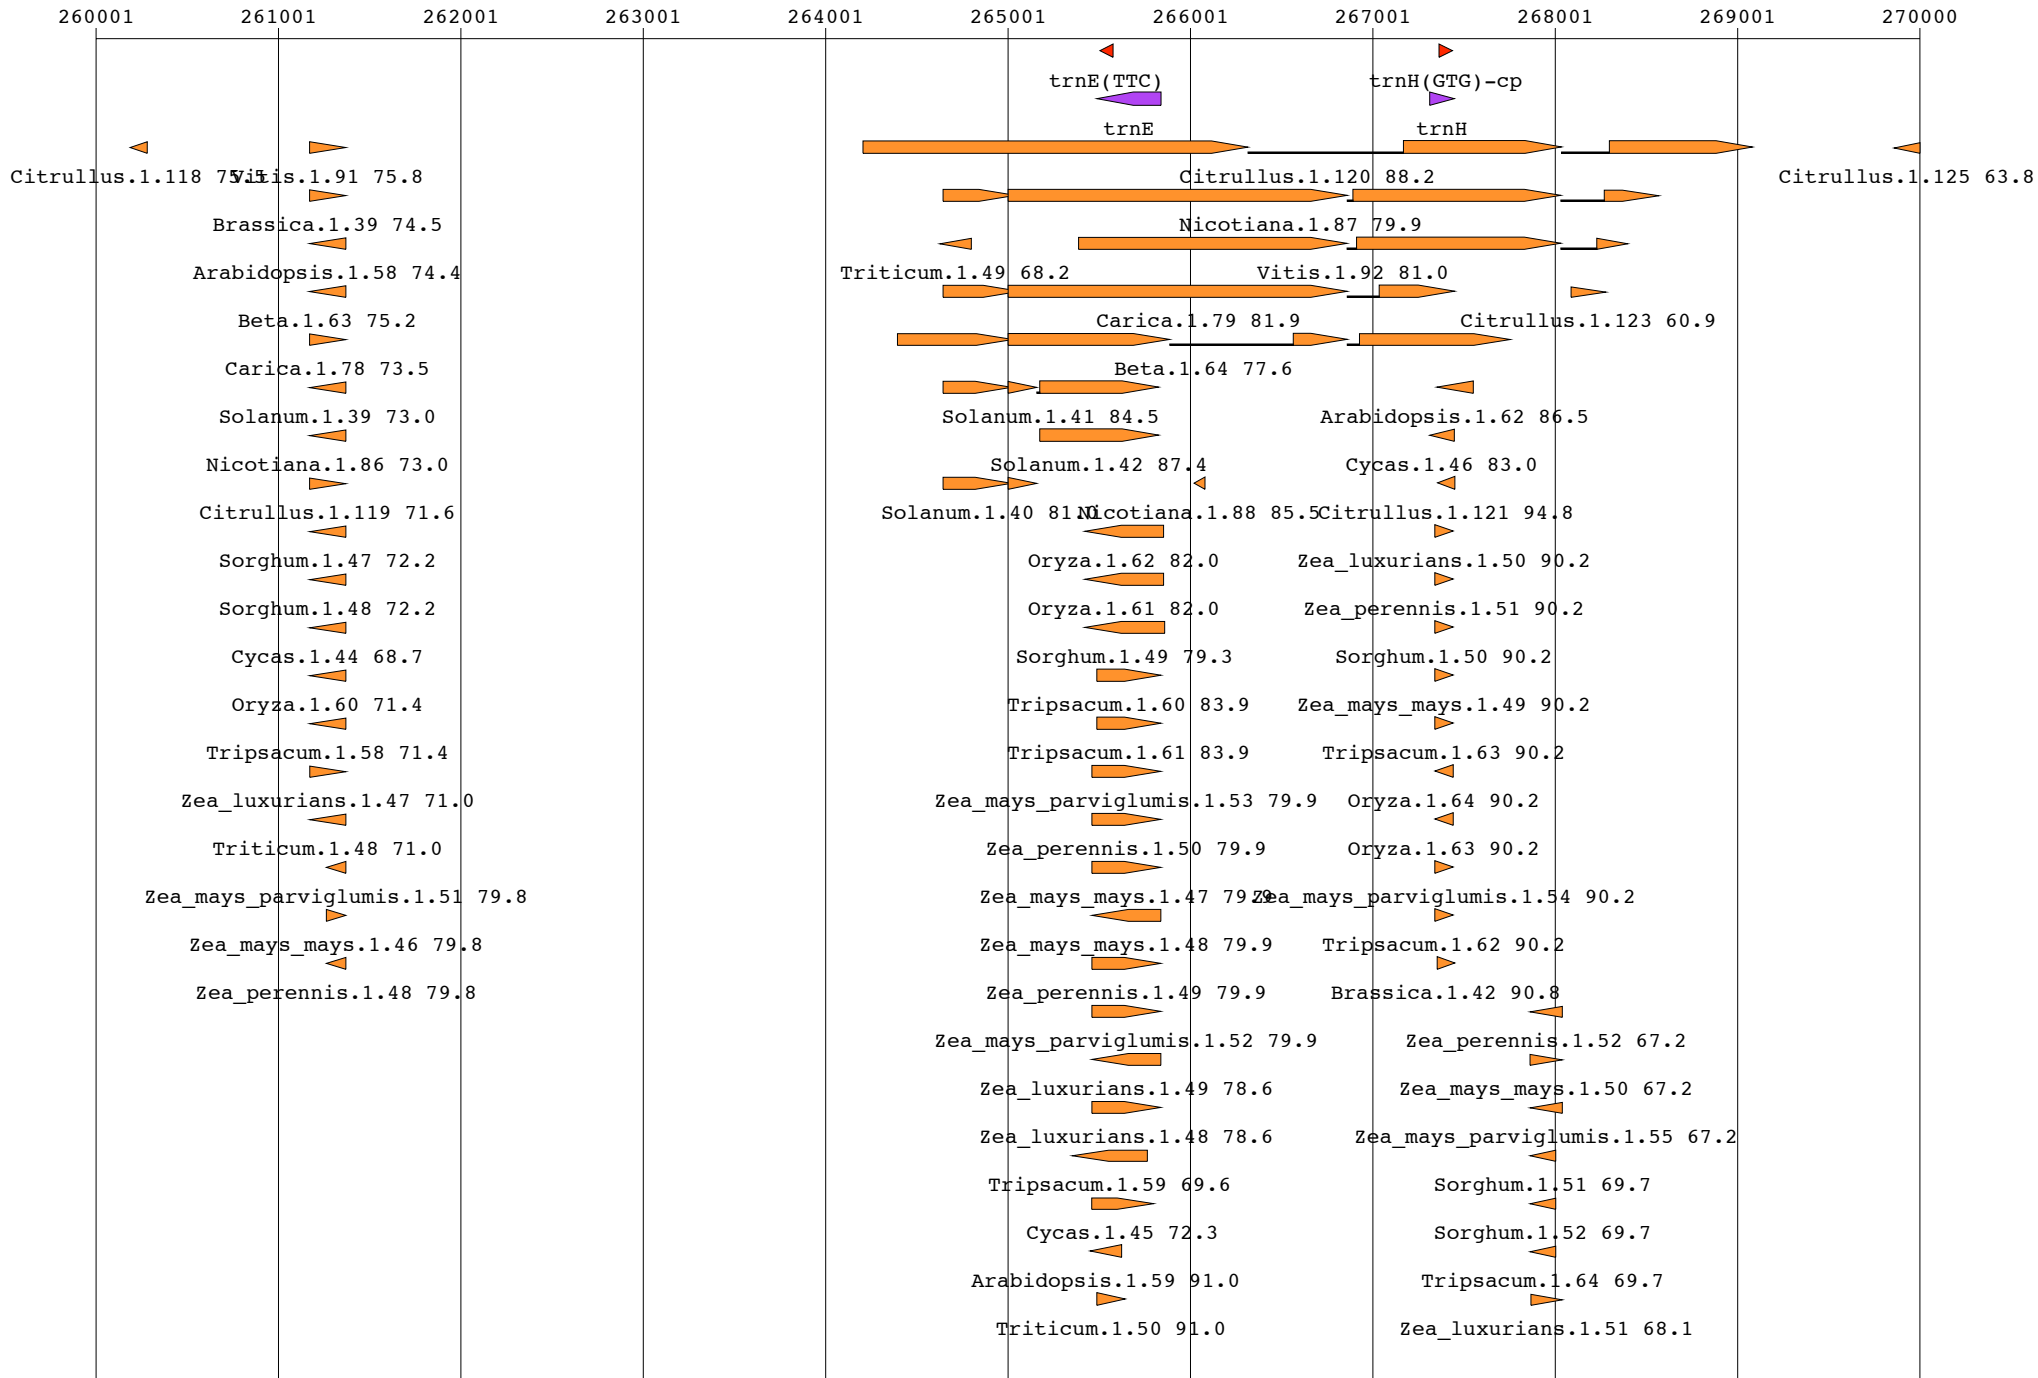

sequence: Cucurbita length: 982833

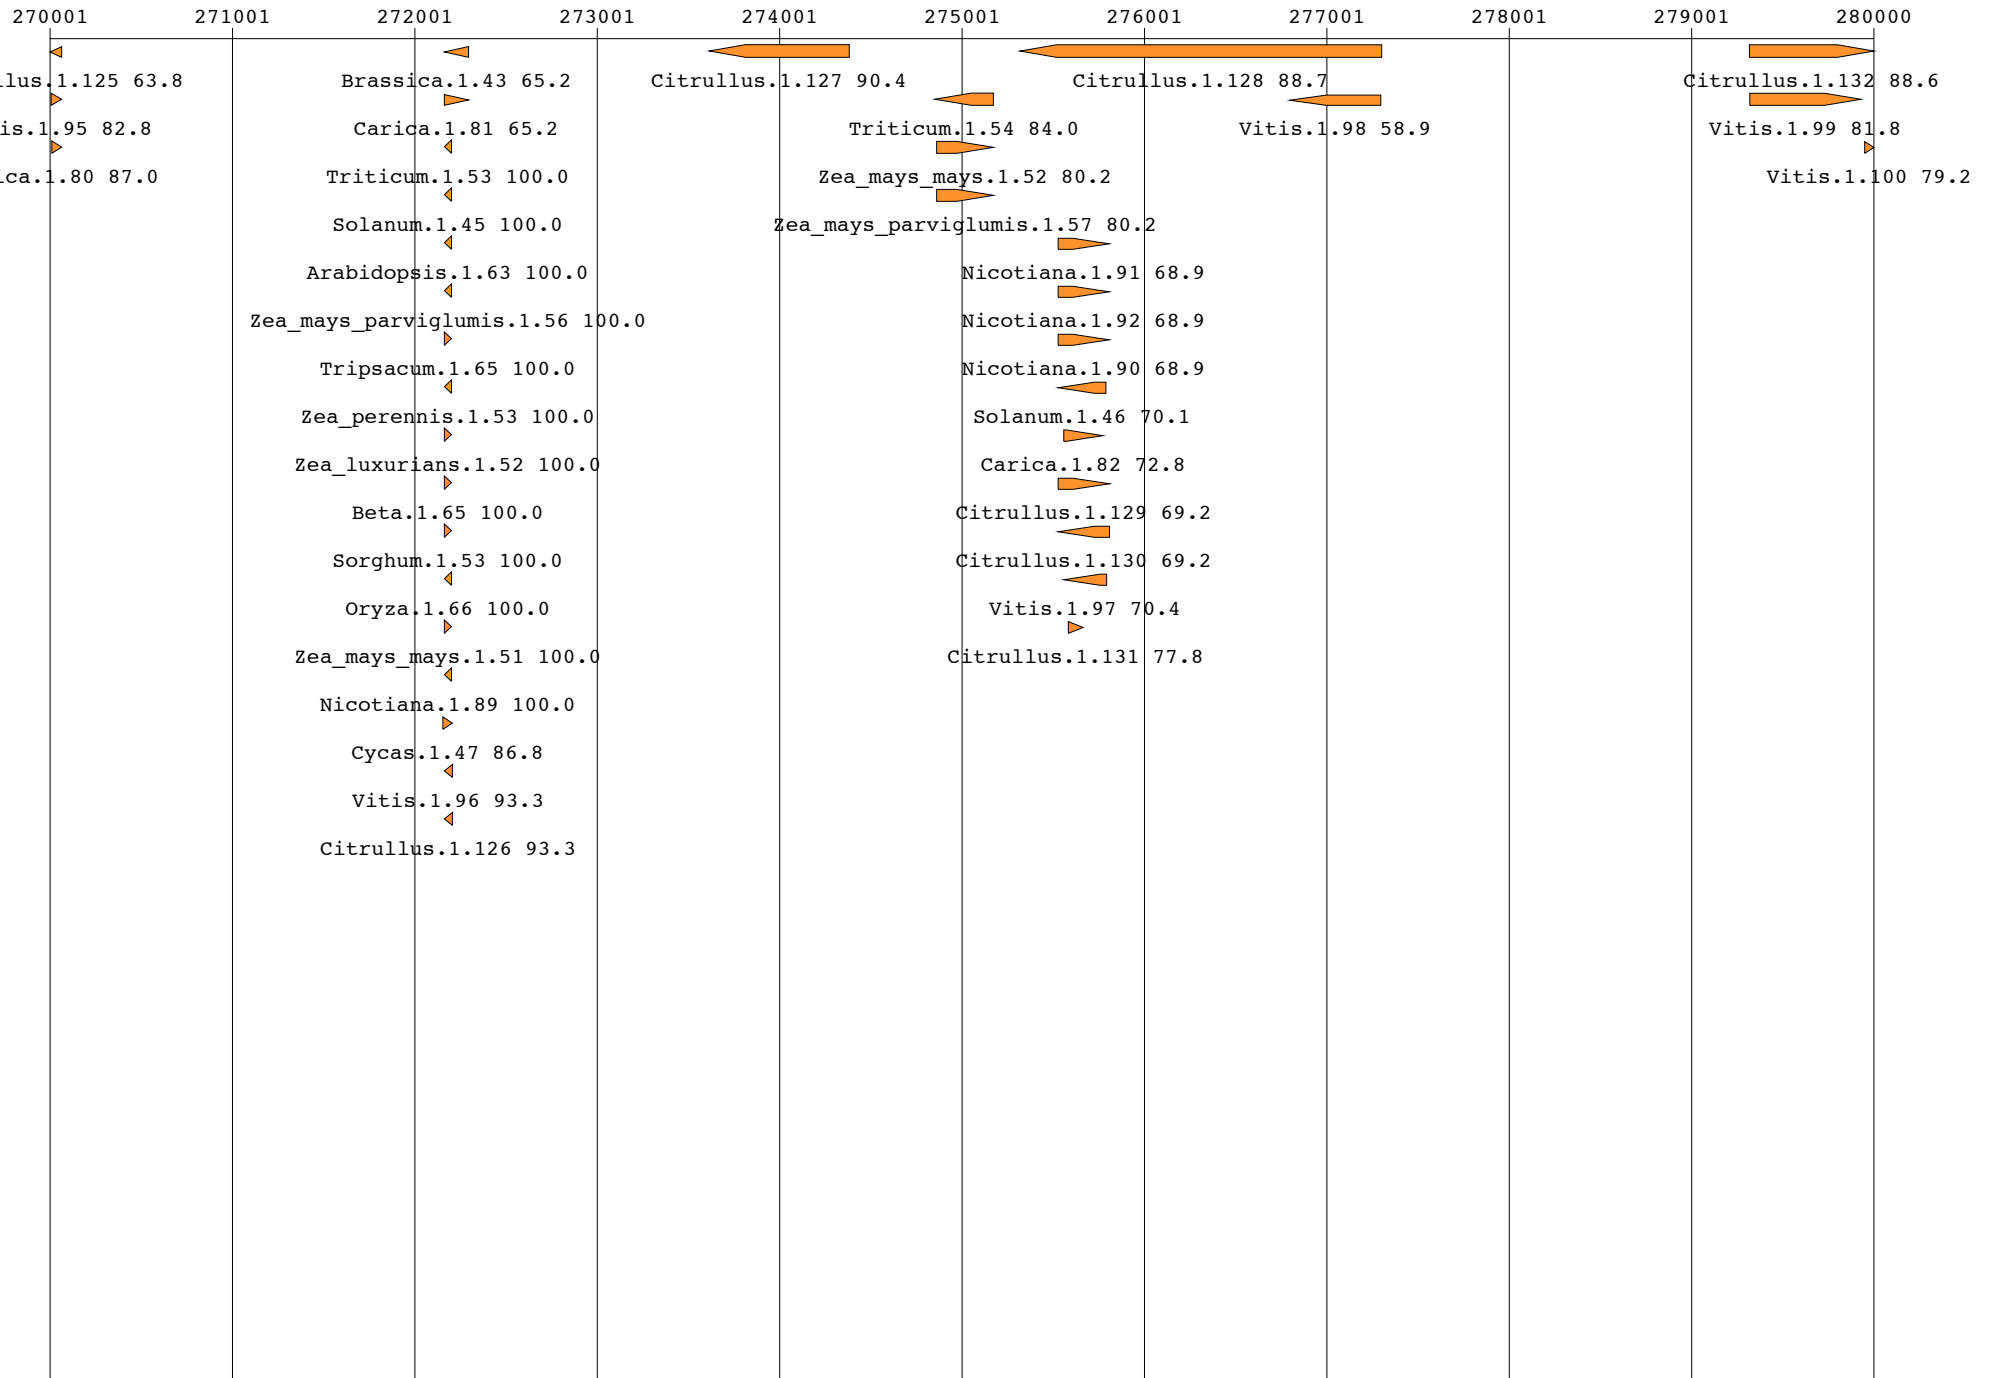

sequence: Cucurbita length: 982833

280001 281001 282001 283001 284001 285001 286001 287001 288001 289001 290000

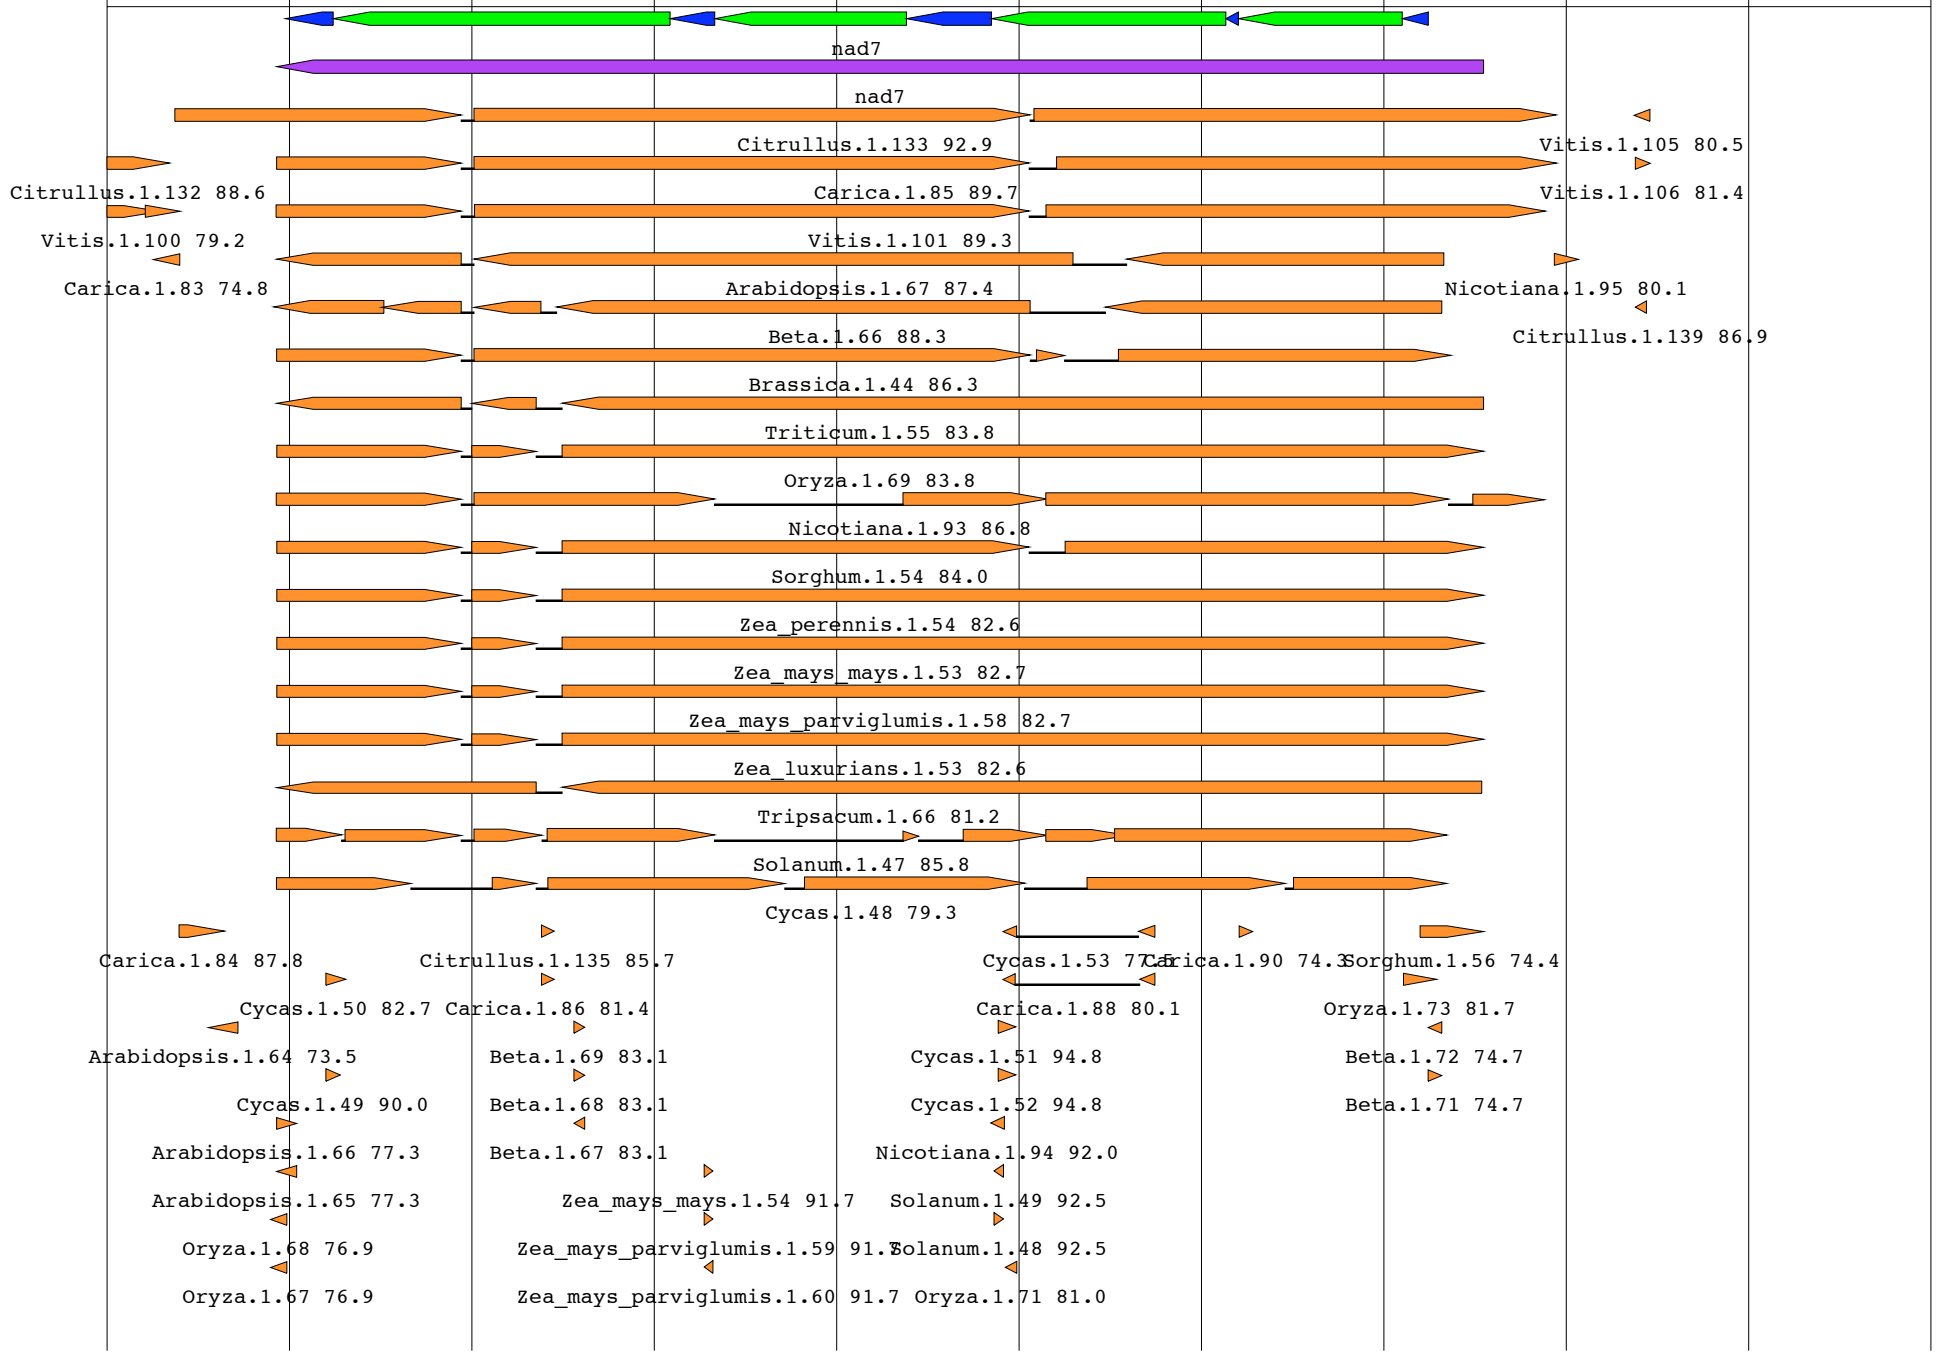

sequence: Cucurbita length: 982833

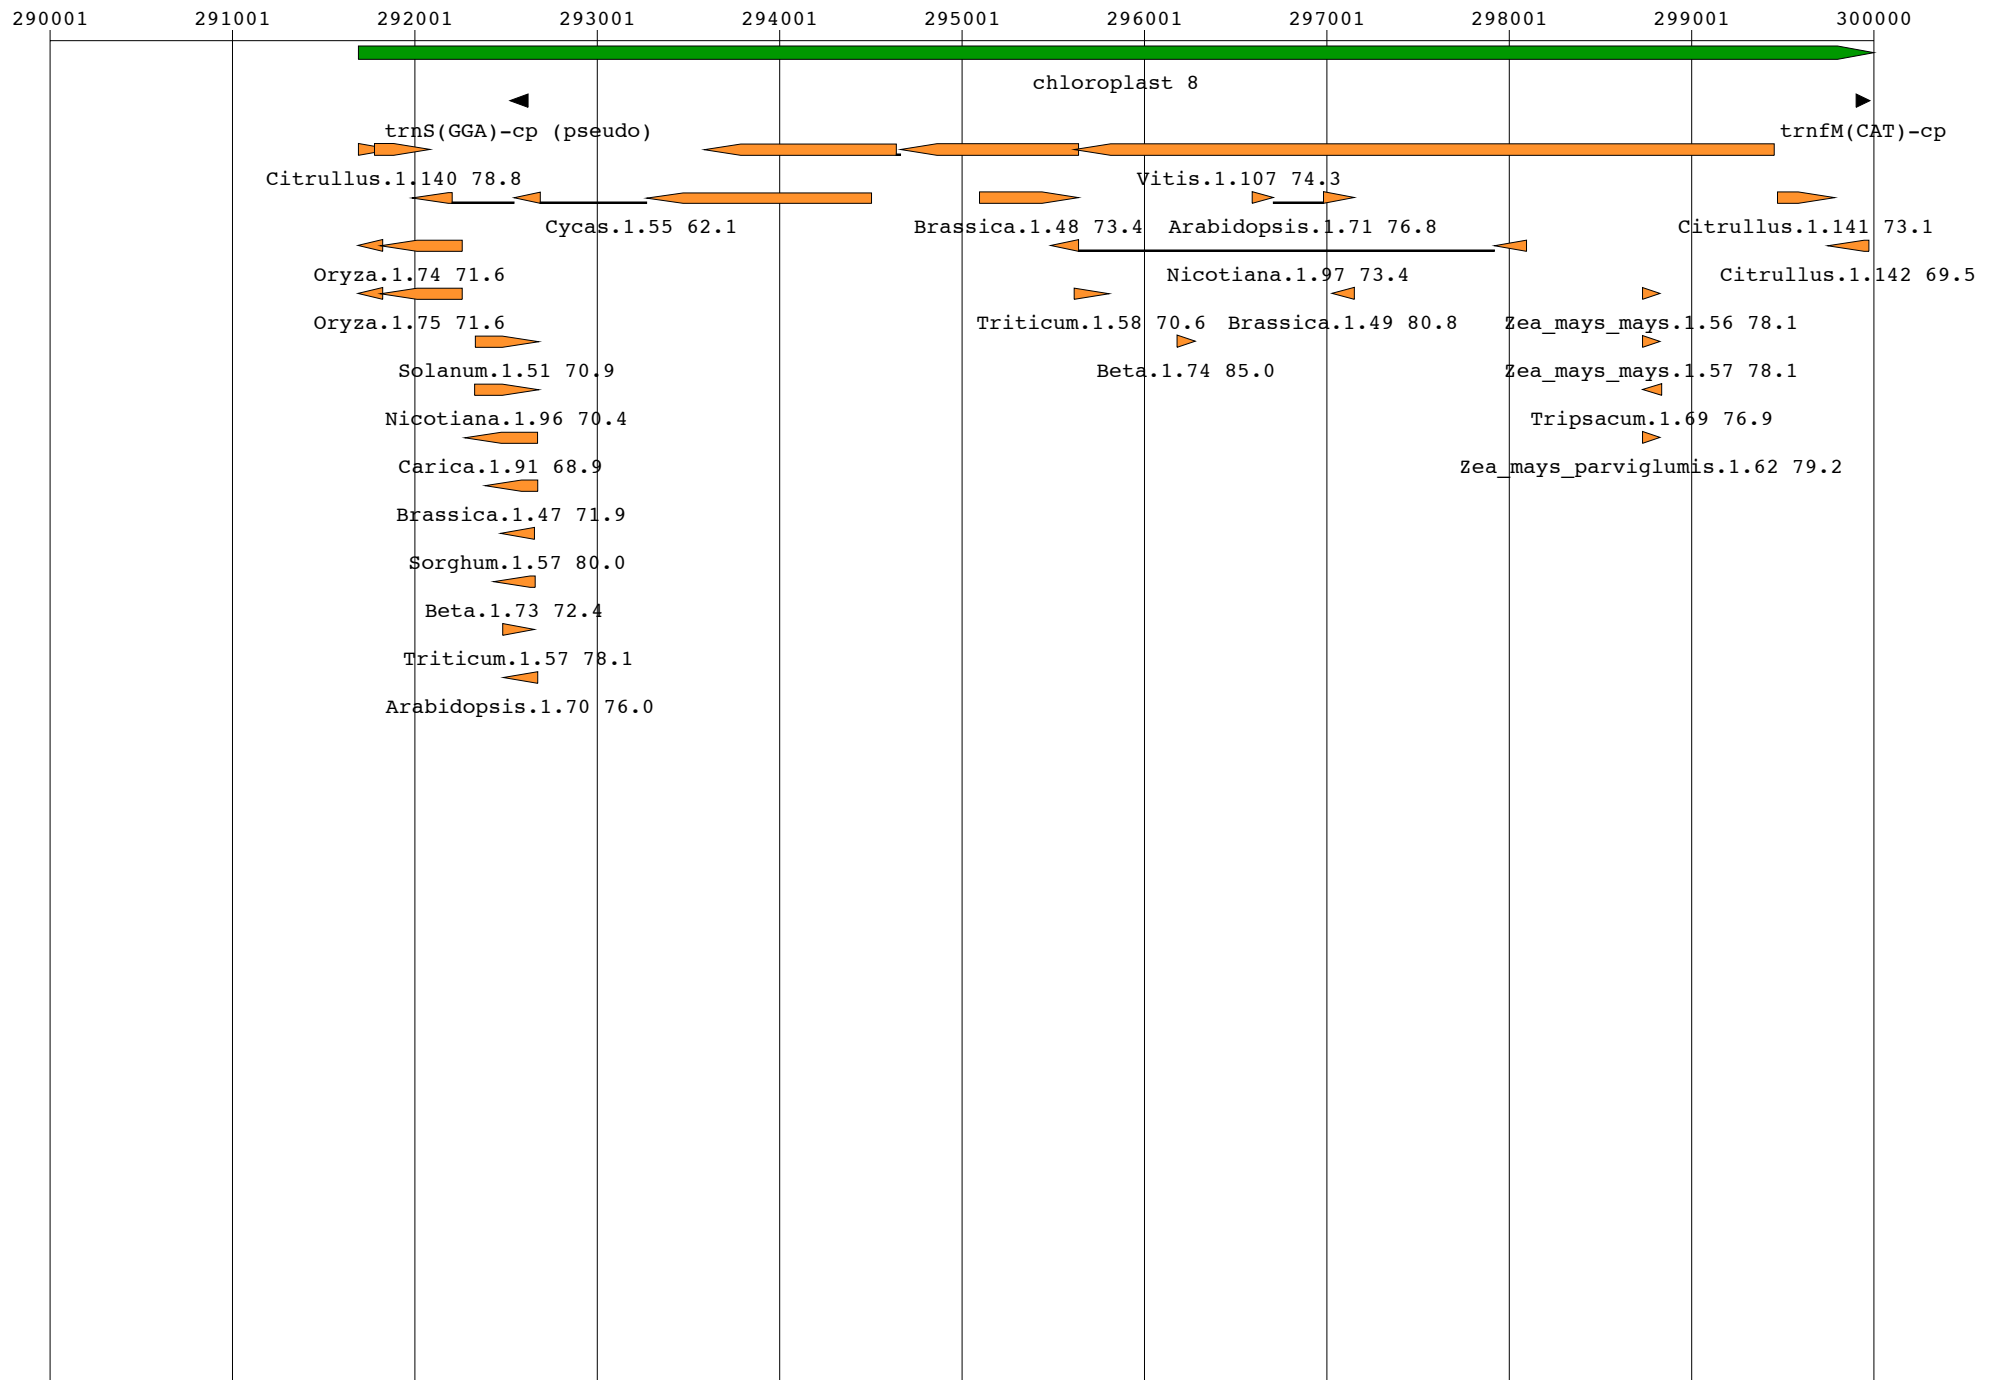

sequence: Cucurbita length: 982833

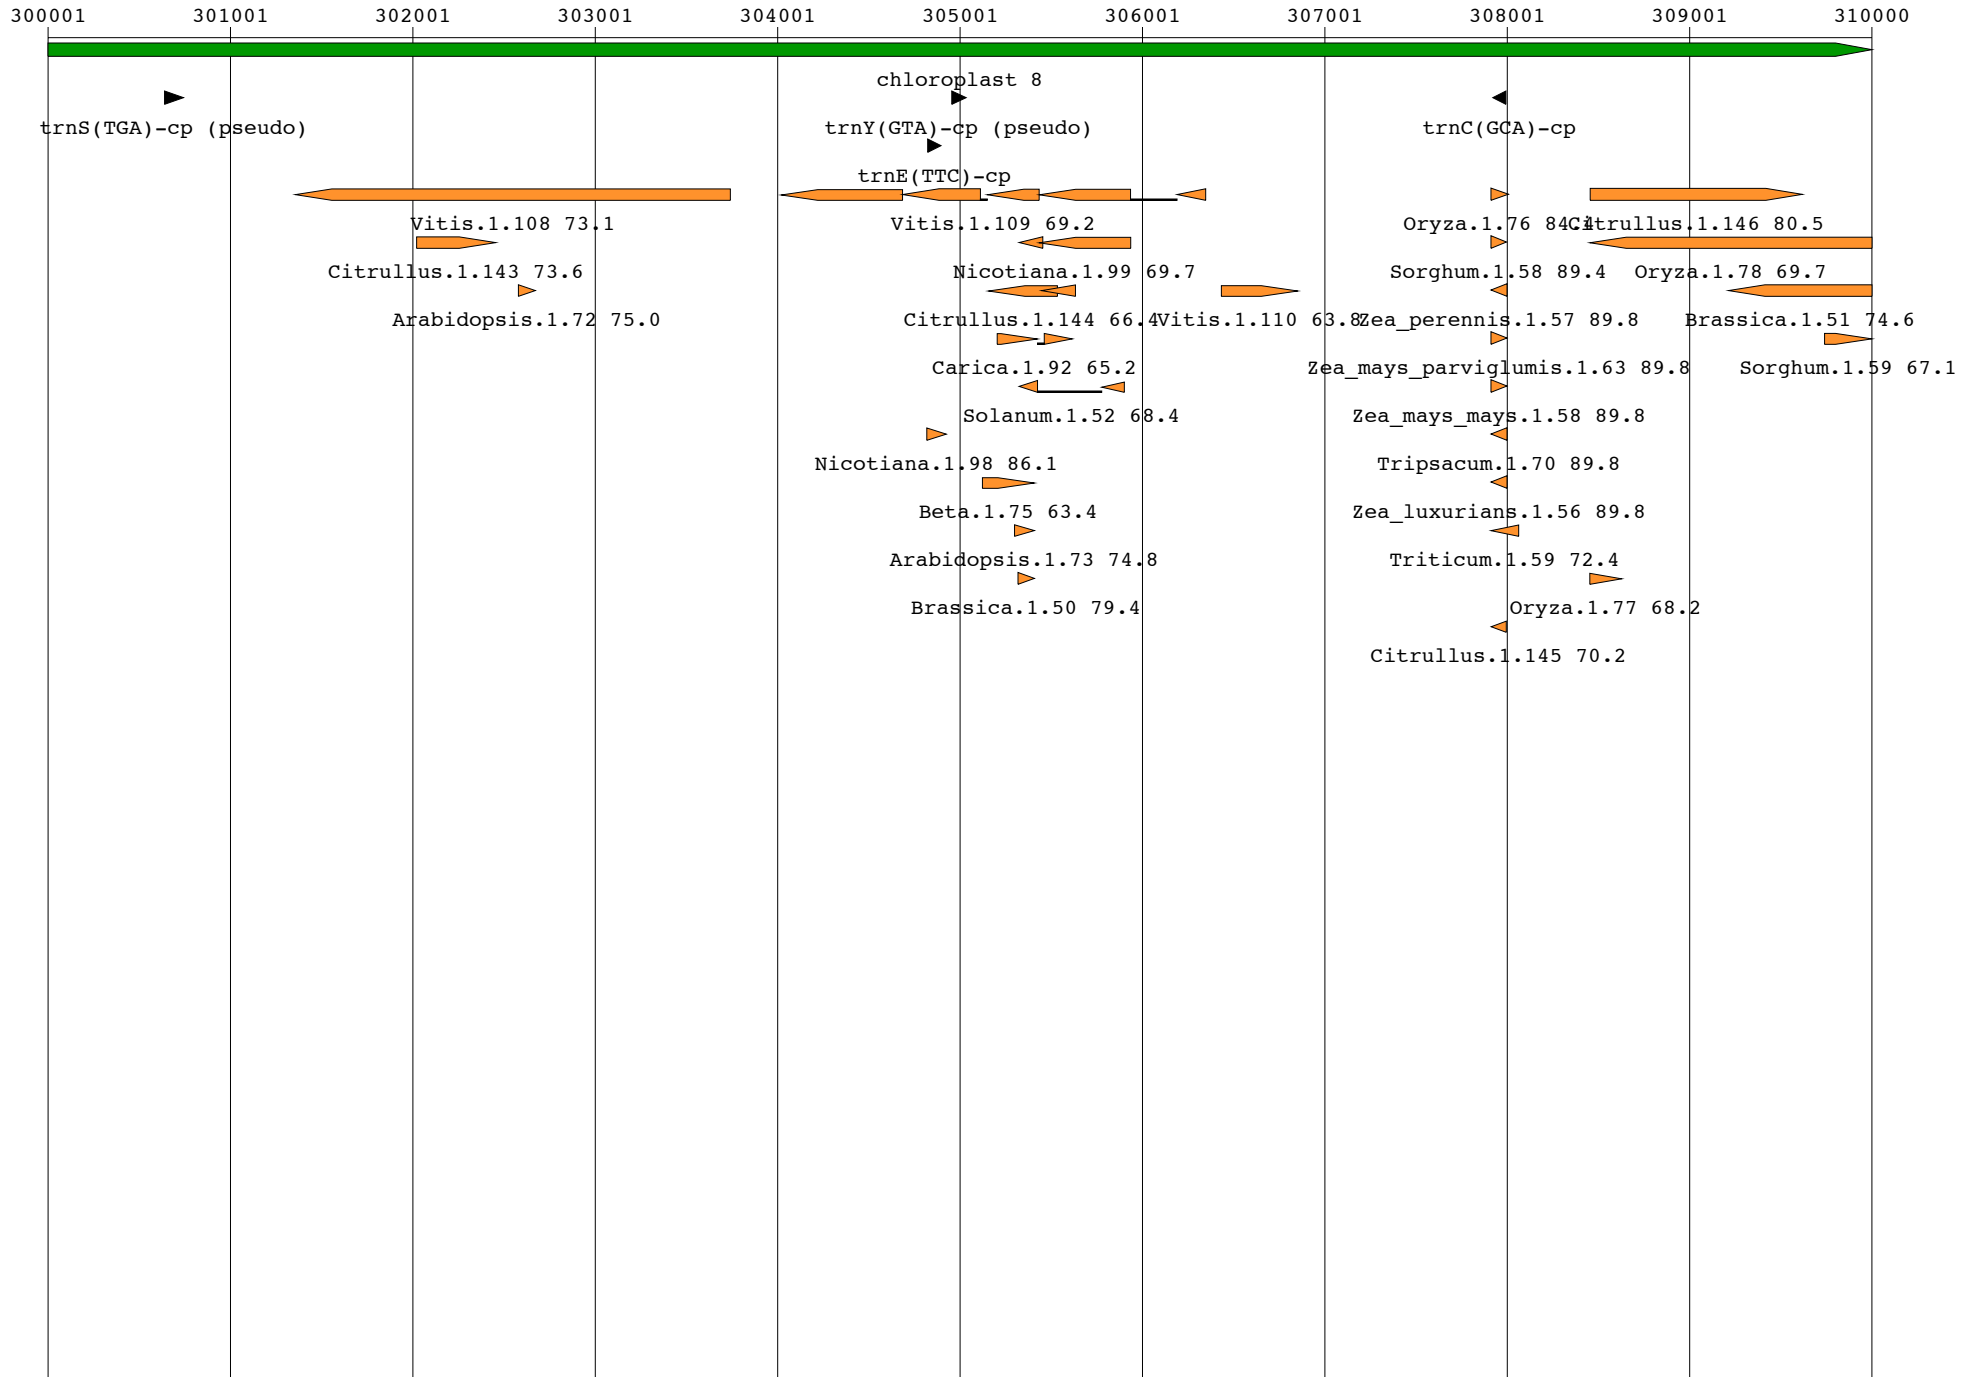

sequence: Cucurbita length: 982833

310001 311001 312001 313001 314001 315001 316001 317001 318001 319001 320000

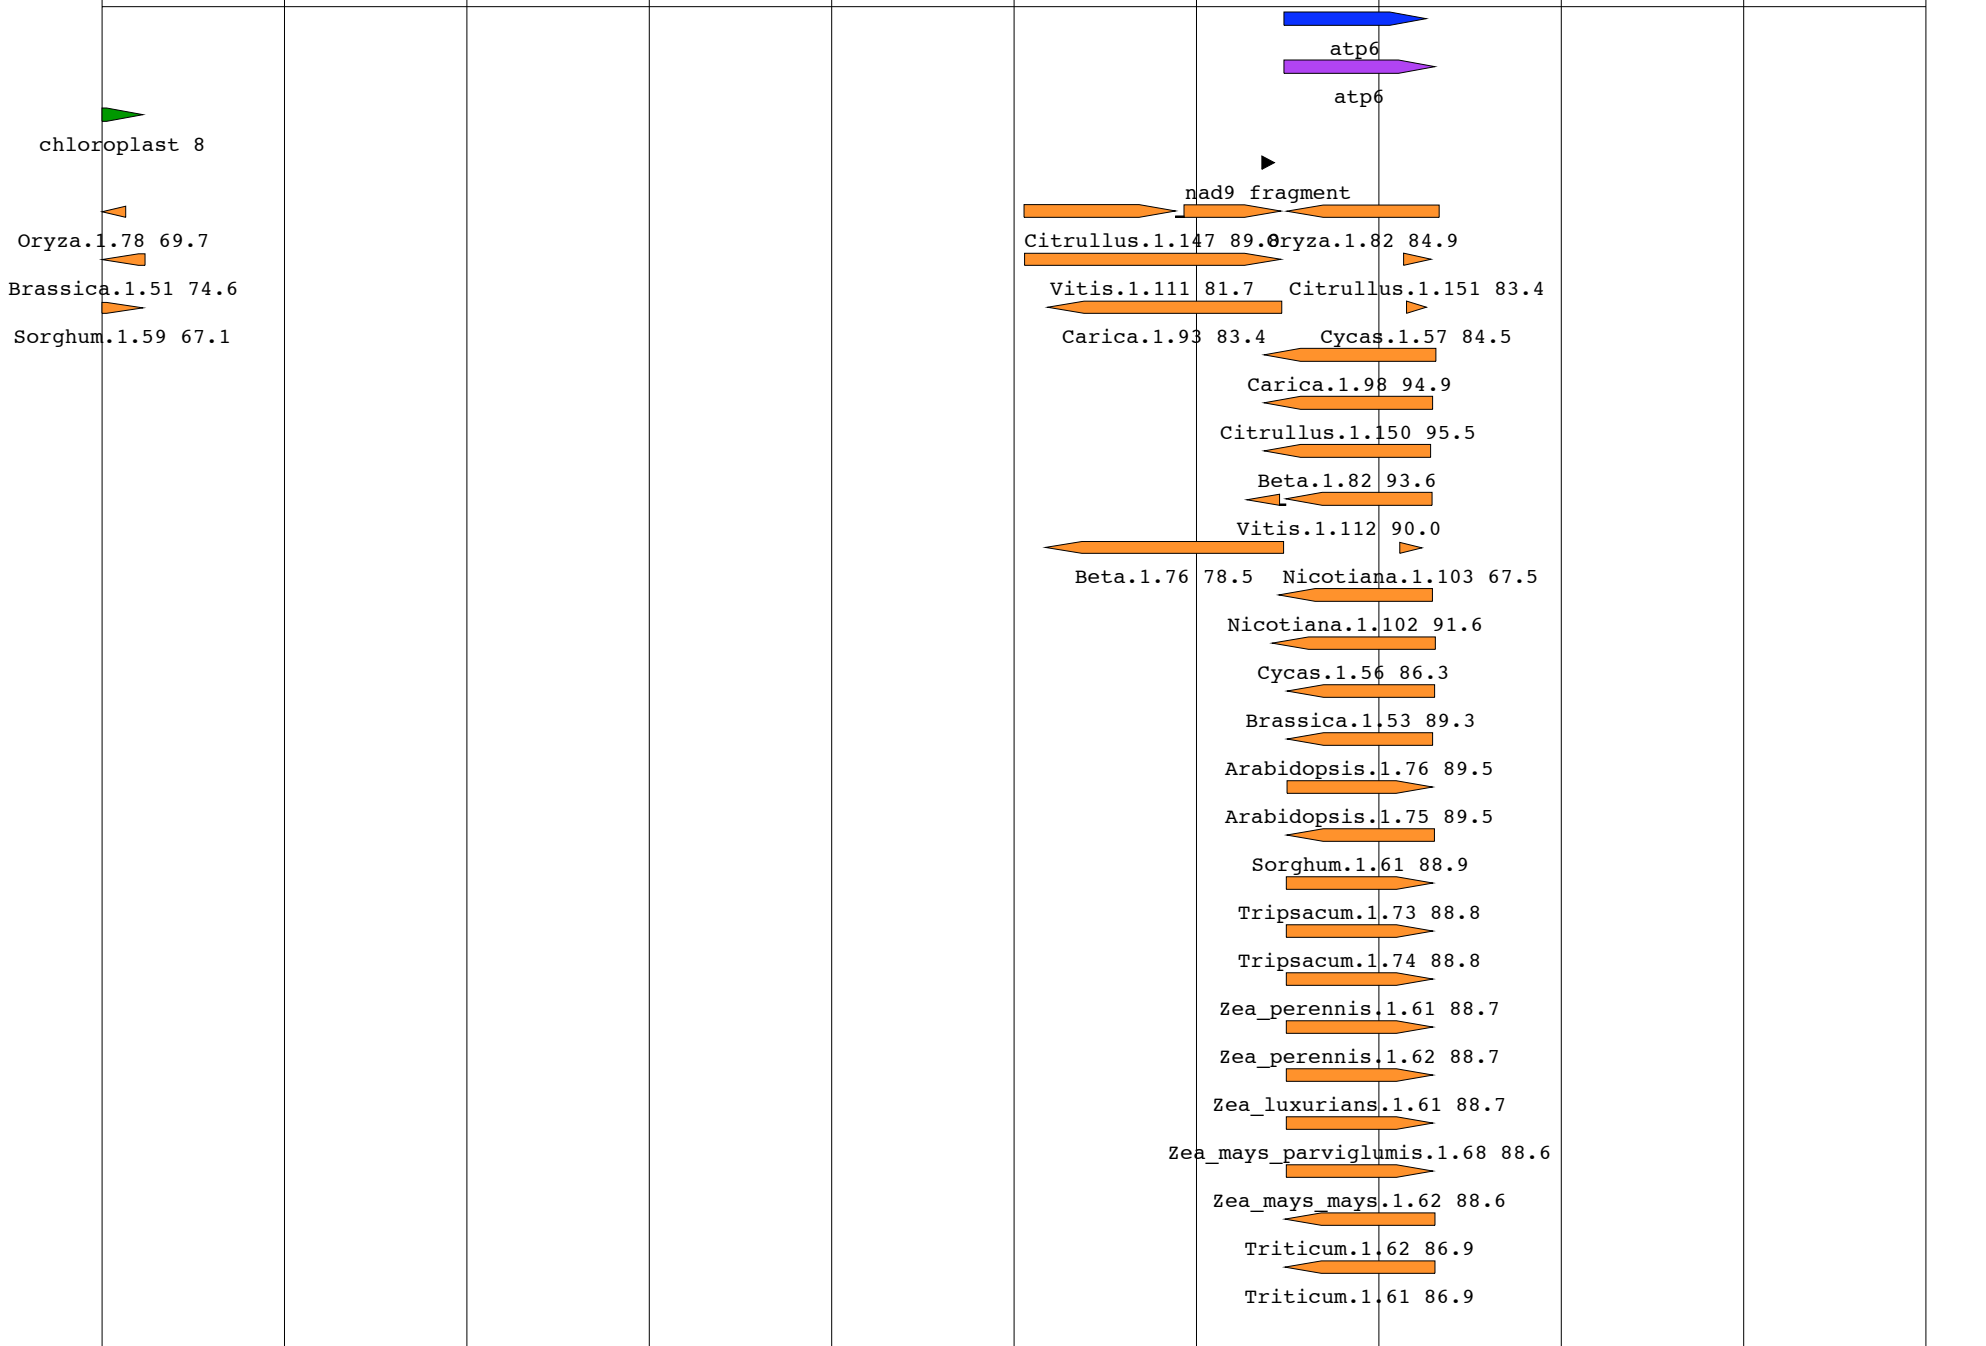



sequence: Cucurbita length: 982833

32001      321001      322001      323001      324001      325001      326001      327001      328001      329001      330000

Vitis.1.116 85.7

sequence: Cucurbita length: 982833

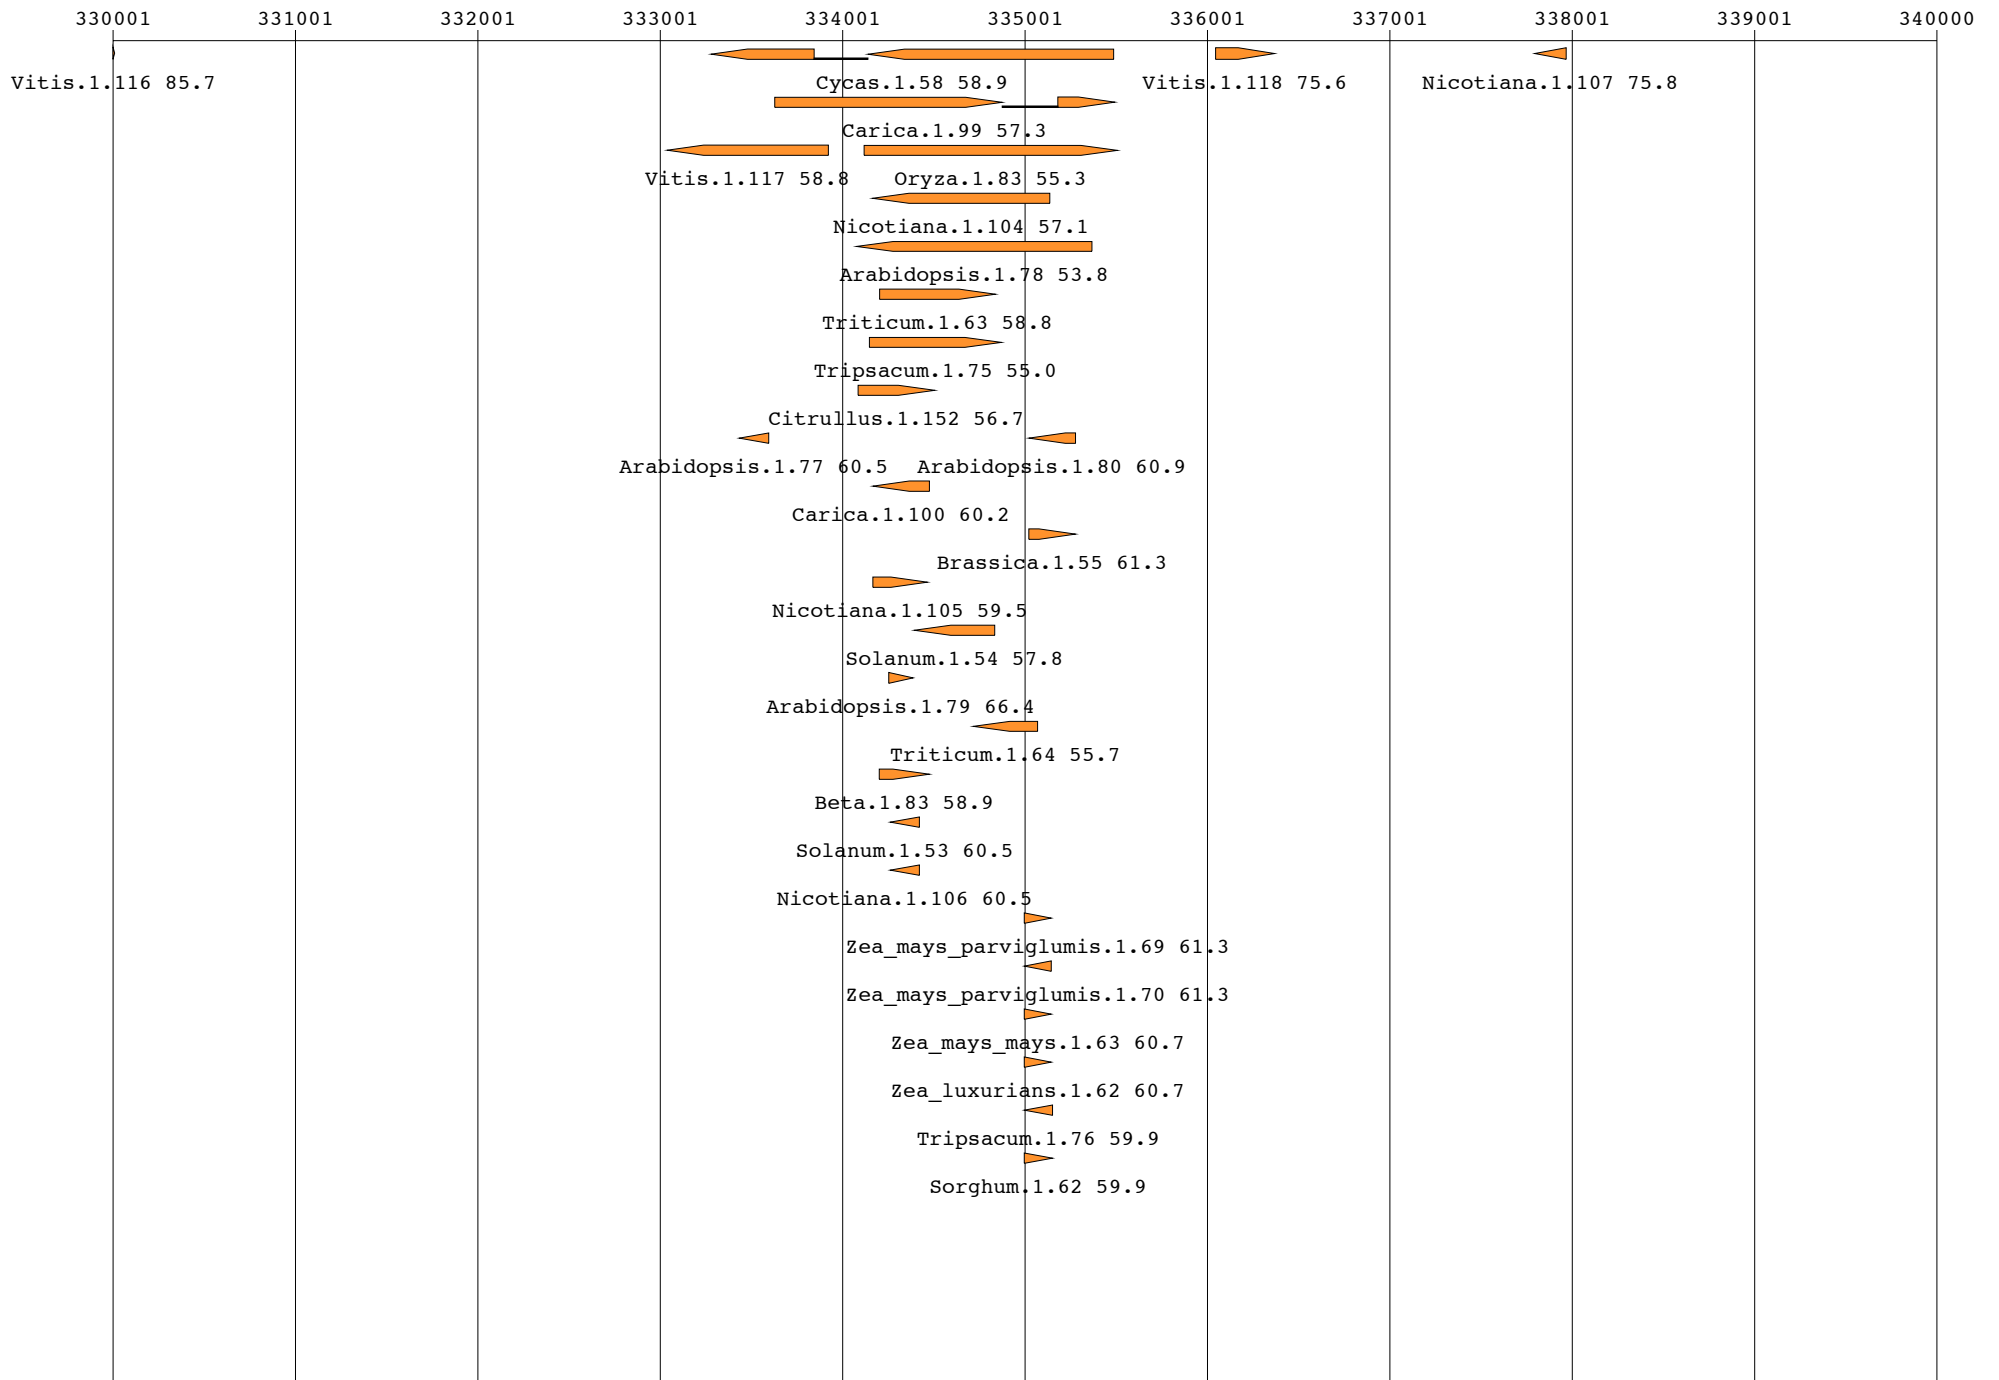

sequence: Cucurbita length: 982833

340001 341001 342001 343001 344001 345001 346001 347001 348001 349001 350000

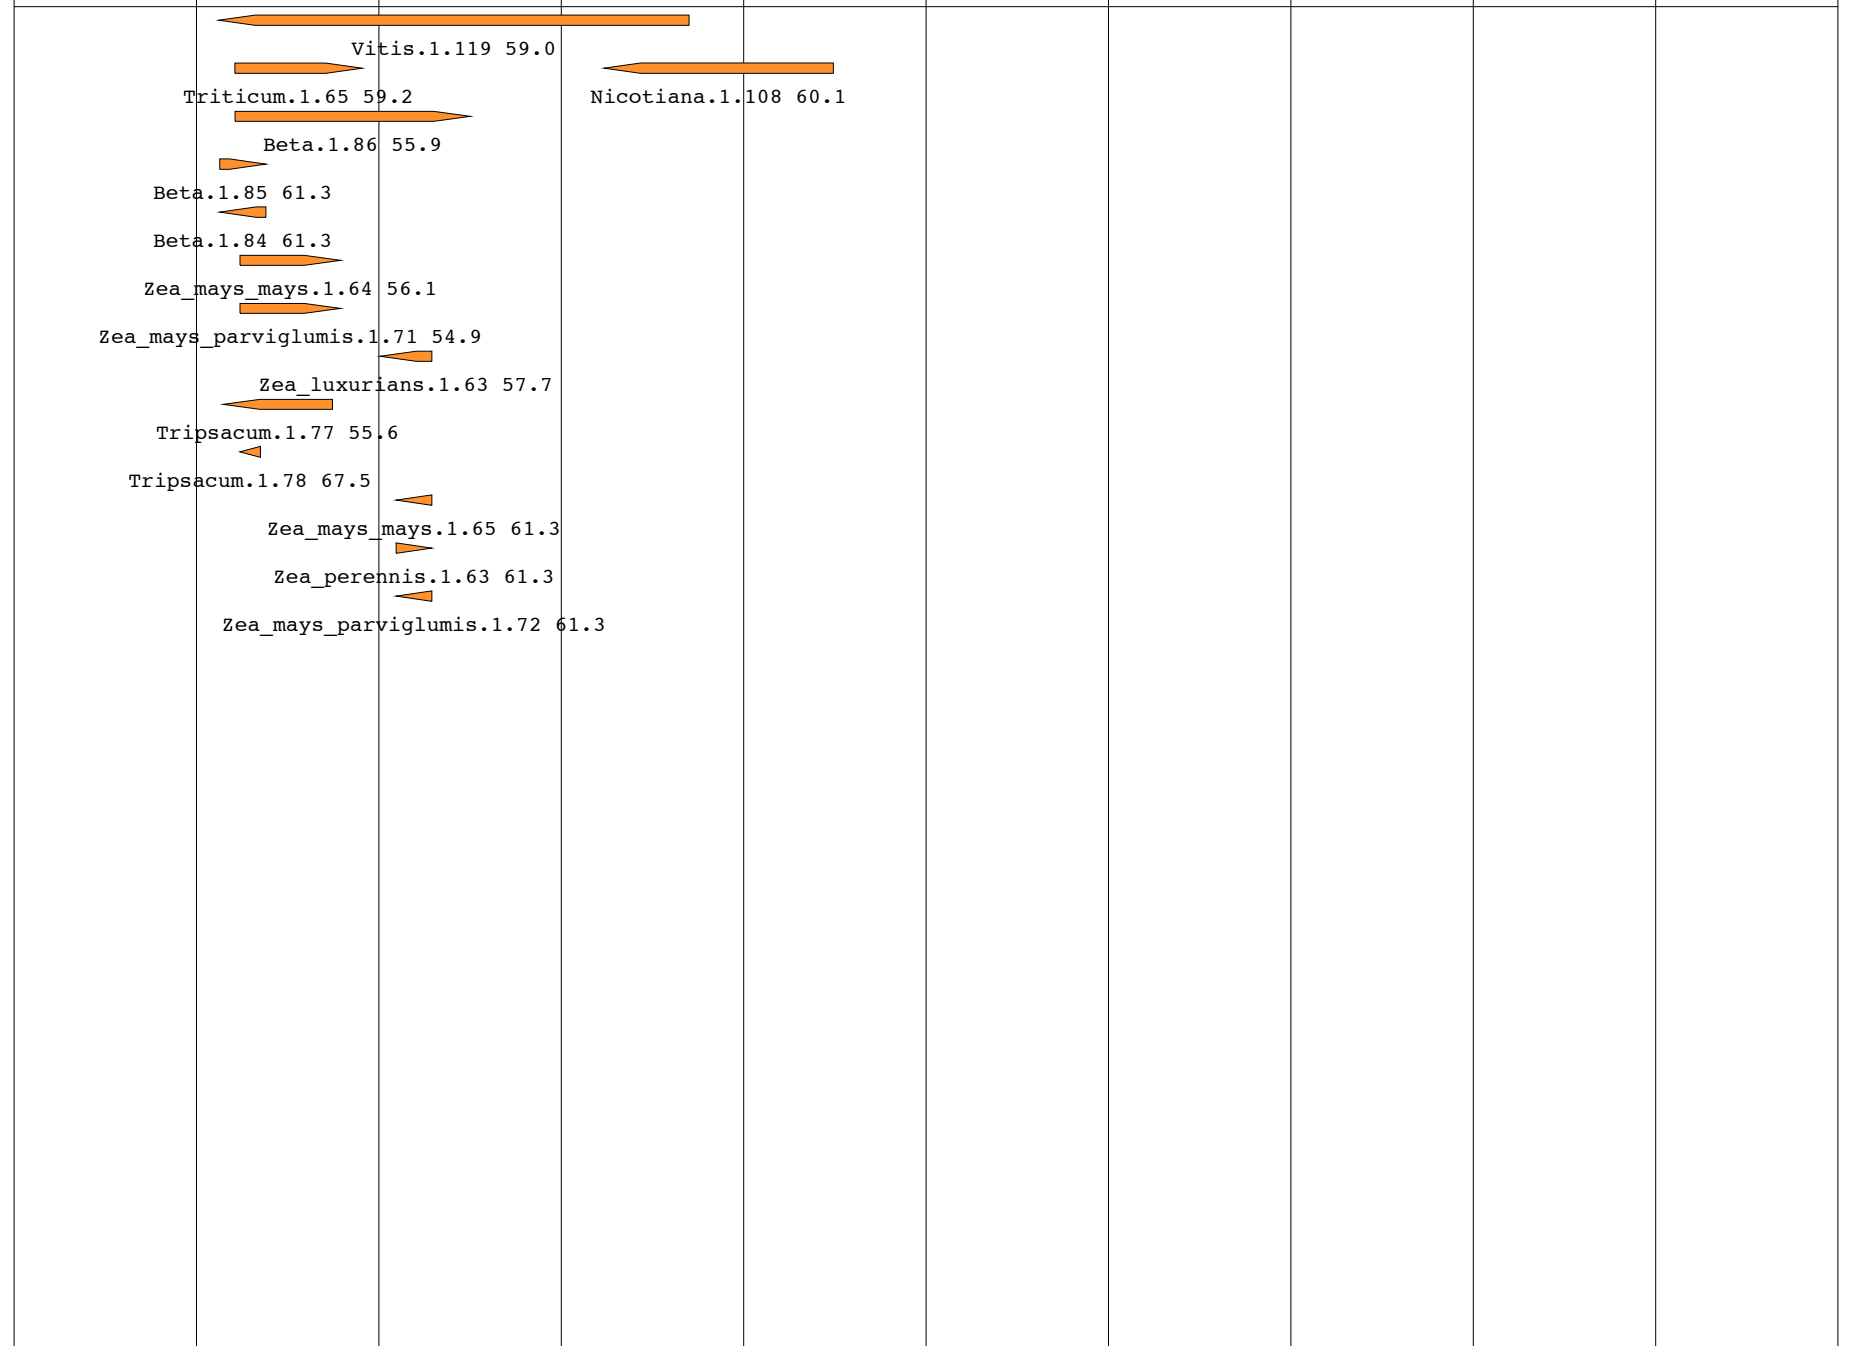

sequence: Cucurbita length: 982833

350001 351001 352001 353001 354001 355001 356001 357001 358001 359001 360000

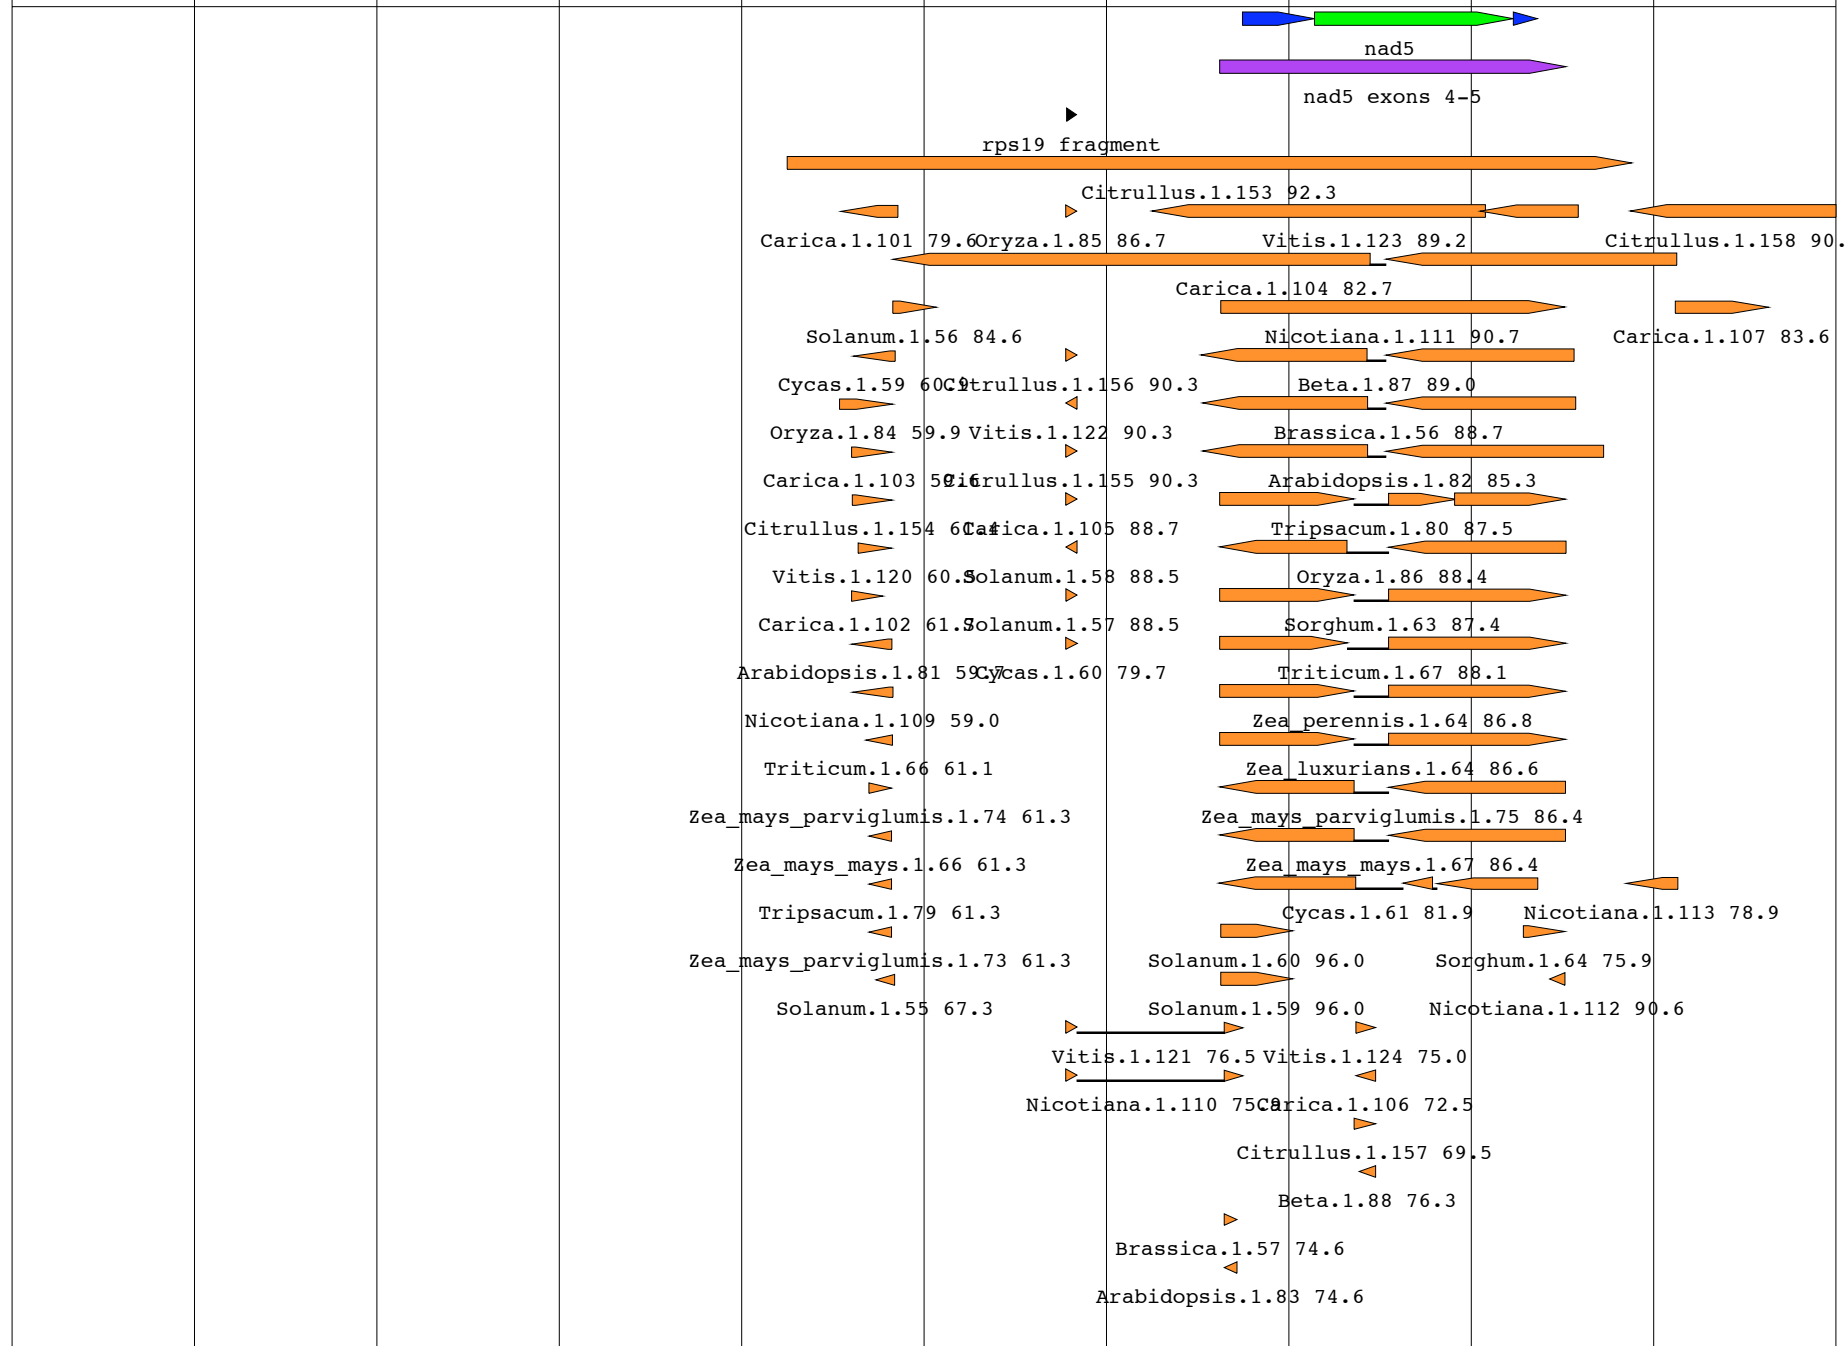

sequence: Cucurbita length: 982833

360001 361001 362001 363001 364001 365001 366001 367001 368001 369001 370000

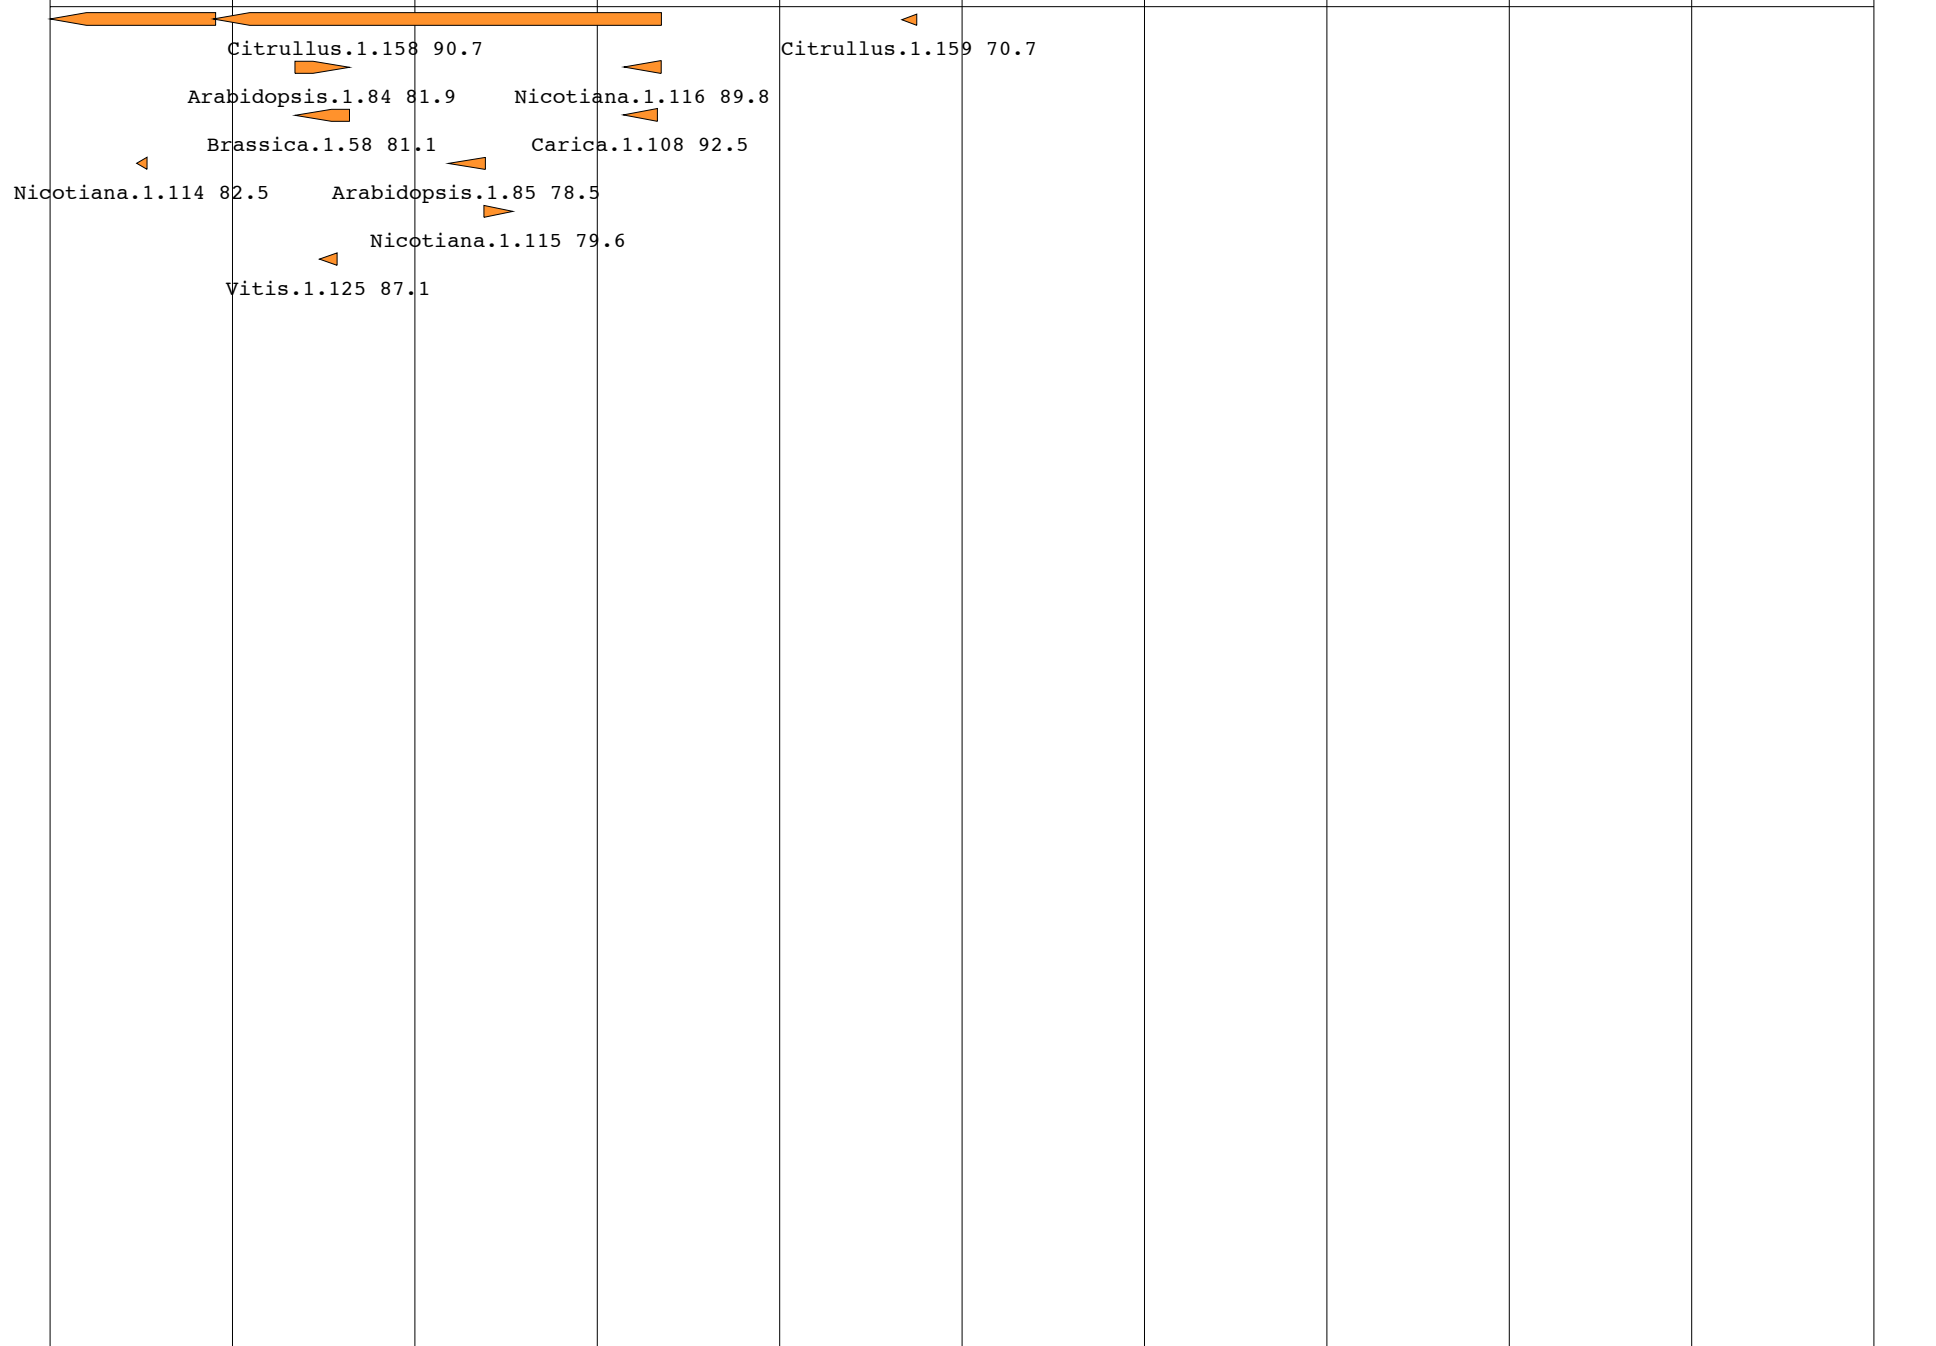



sequence: Cucurbita length: 982833

380001      381001      382001      383001      384001      385001      386001      387001      388001      389001      390000

▶  
Citrullus.1.160 70.1

▶  
Citrullus.1.164 79.5  
▶  
Citrullus.1.163 79.5  
▶  
Citrullus.1.162 80.0  
▶  
Citrullus.1.161 76.2  
▶  
Citrullus.1.165 78.9  
▶  
Citrullus.1.168 76.4  
▶  
Citrullus.1.166 75.3  
▶  
Citrullus.1.169 72.0  
▶  
Citrullus.1.167 78.5

sequence: Cucurbita length: 982833

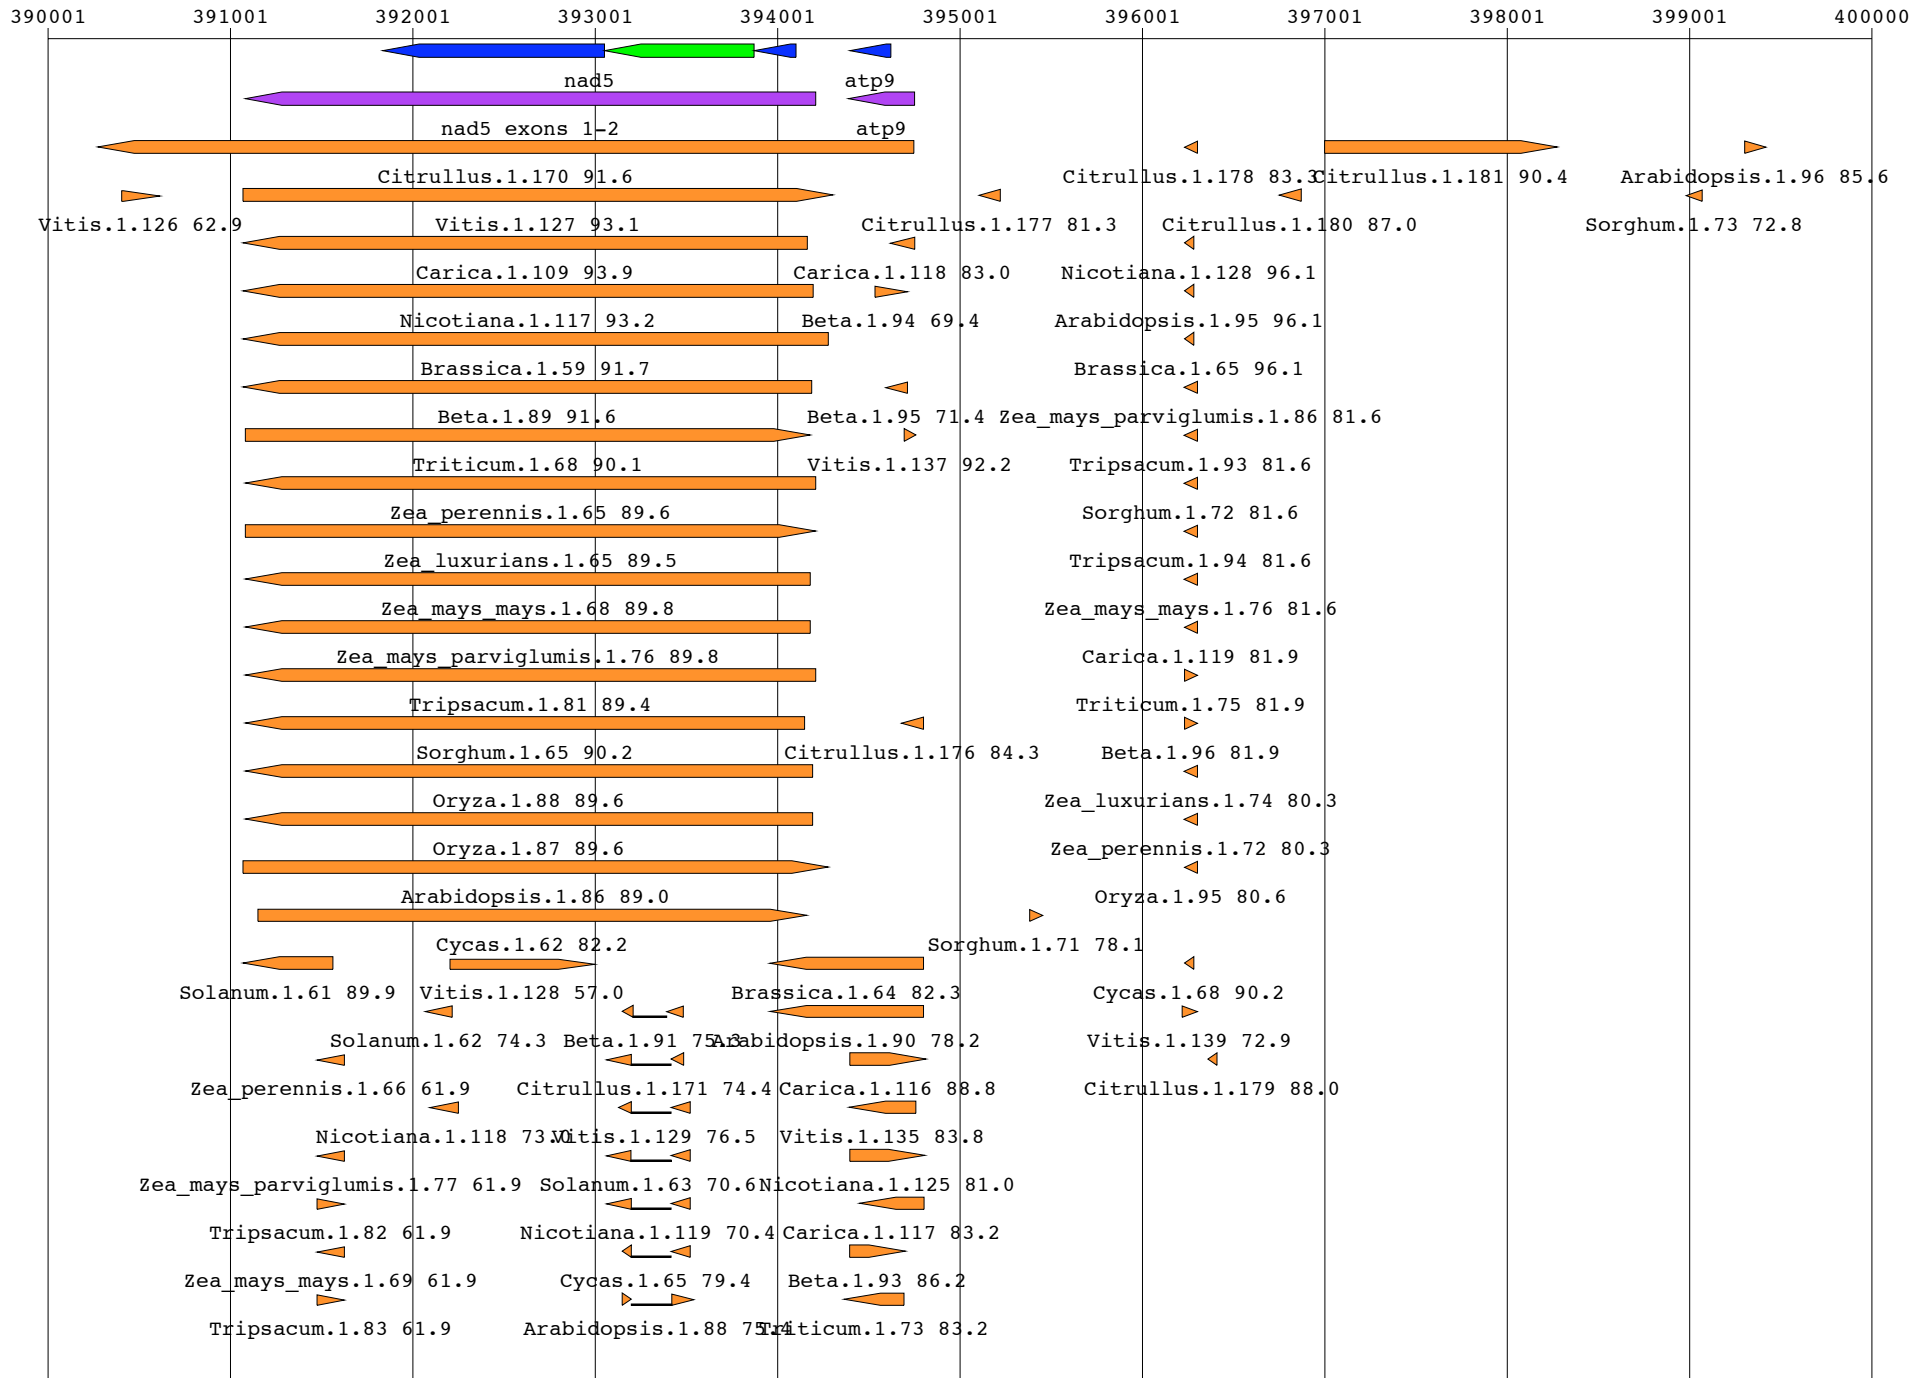



sequence: Cucurbita length: 982833

400001 401001 402001 403001 404001 405001 406001 407001 408001 409001 410000

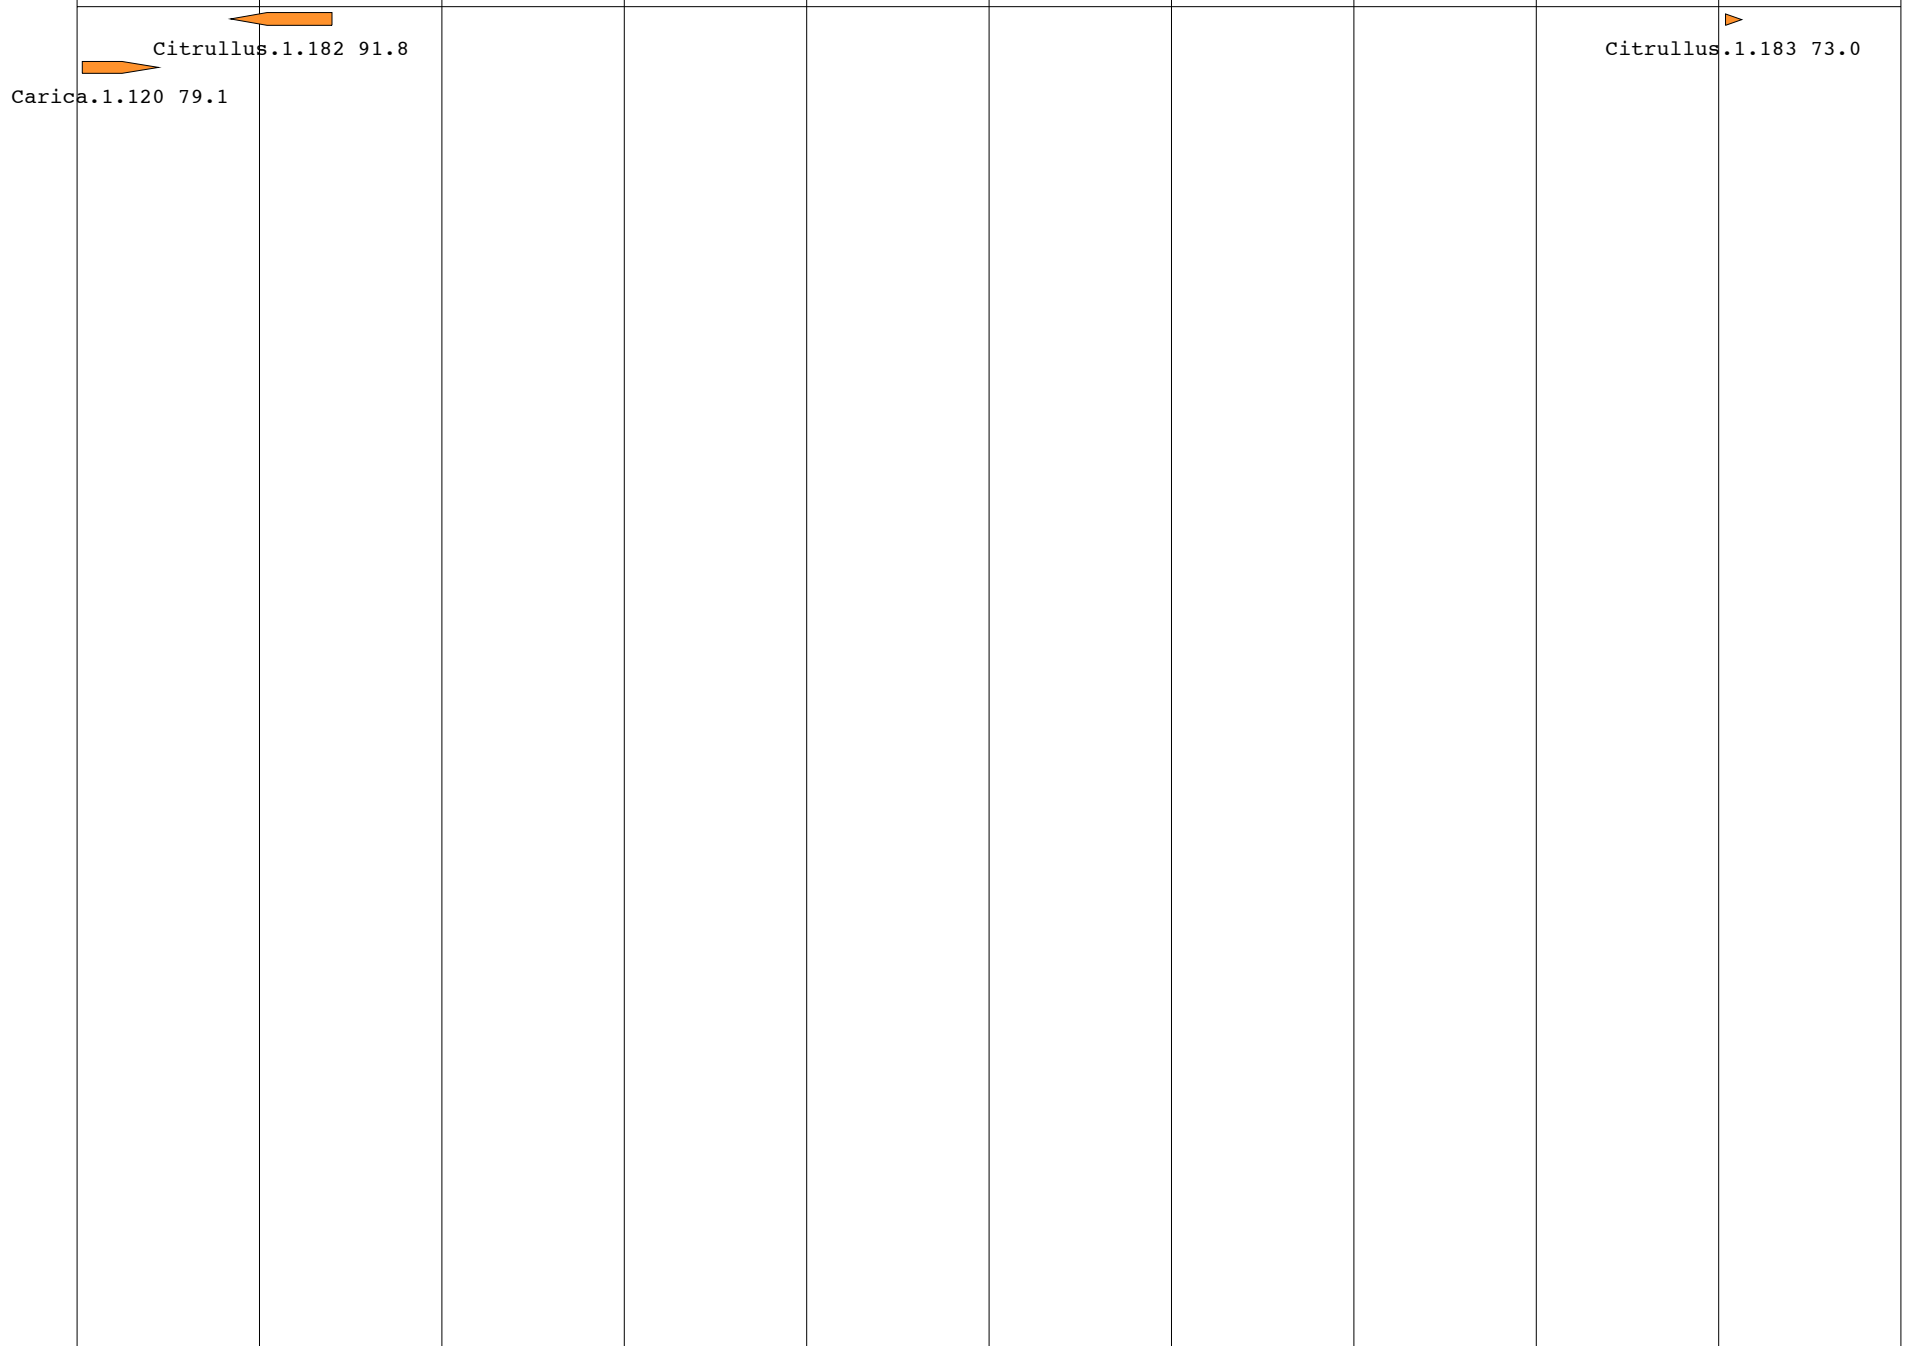

sequence: Cucurbita length: 982833

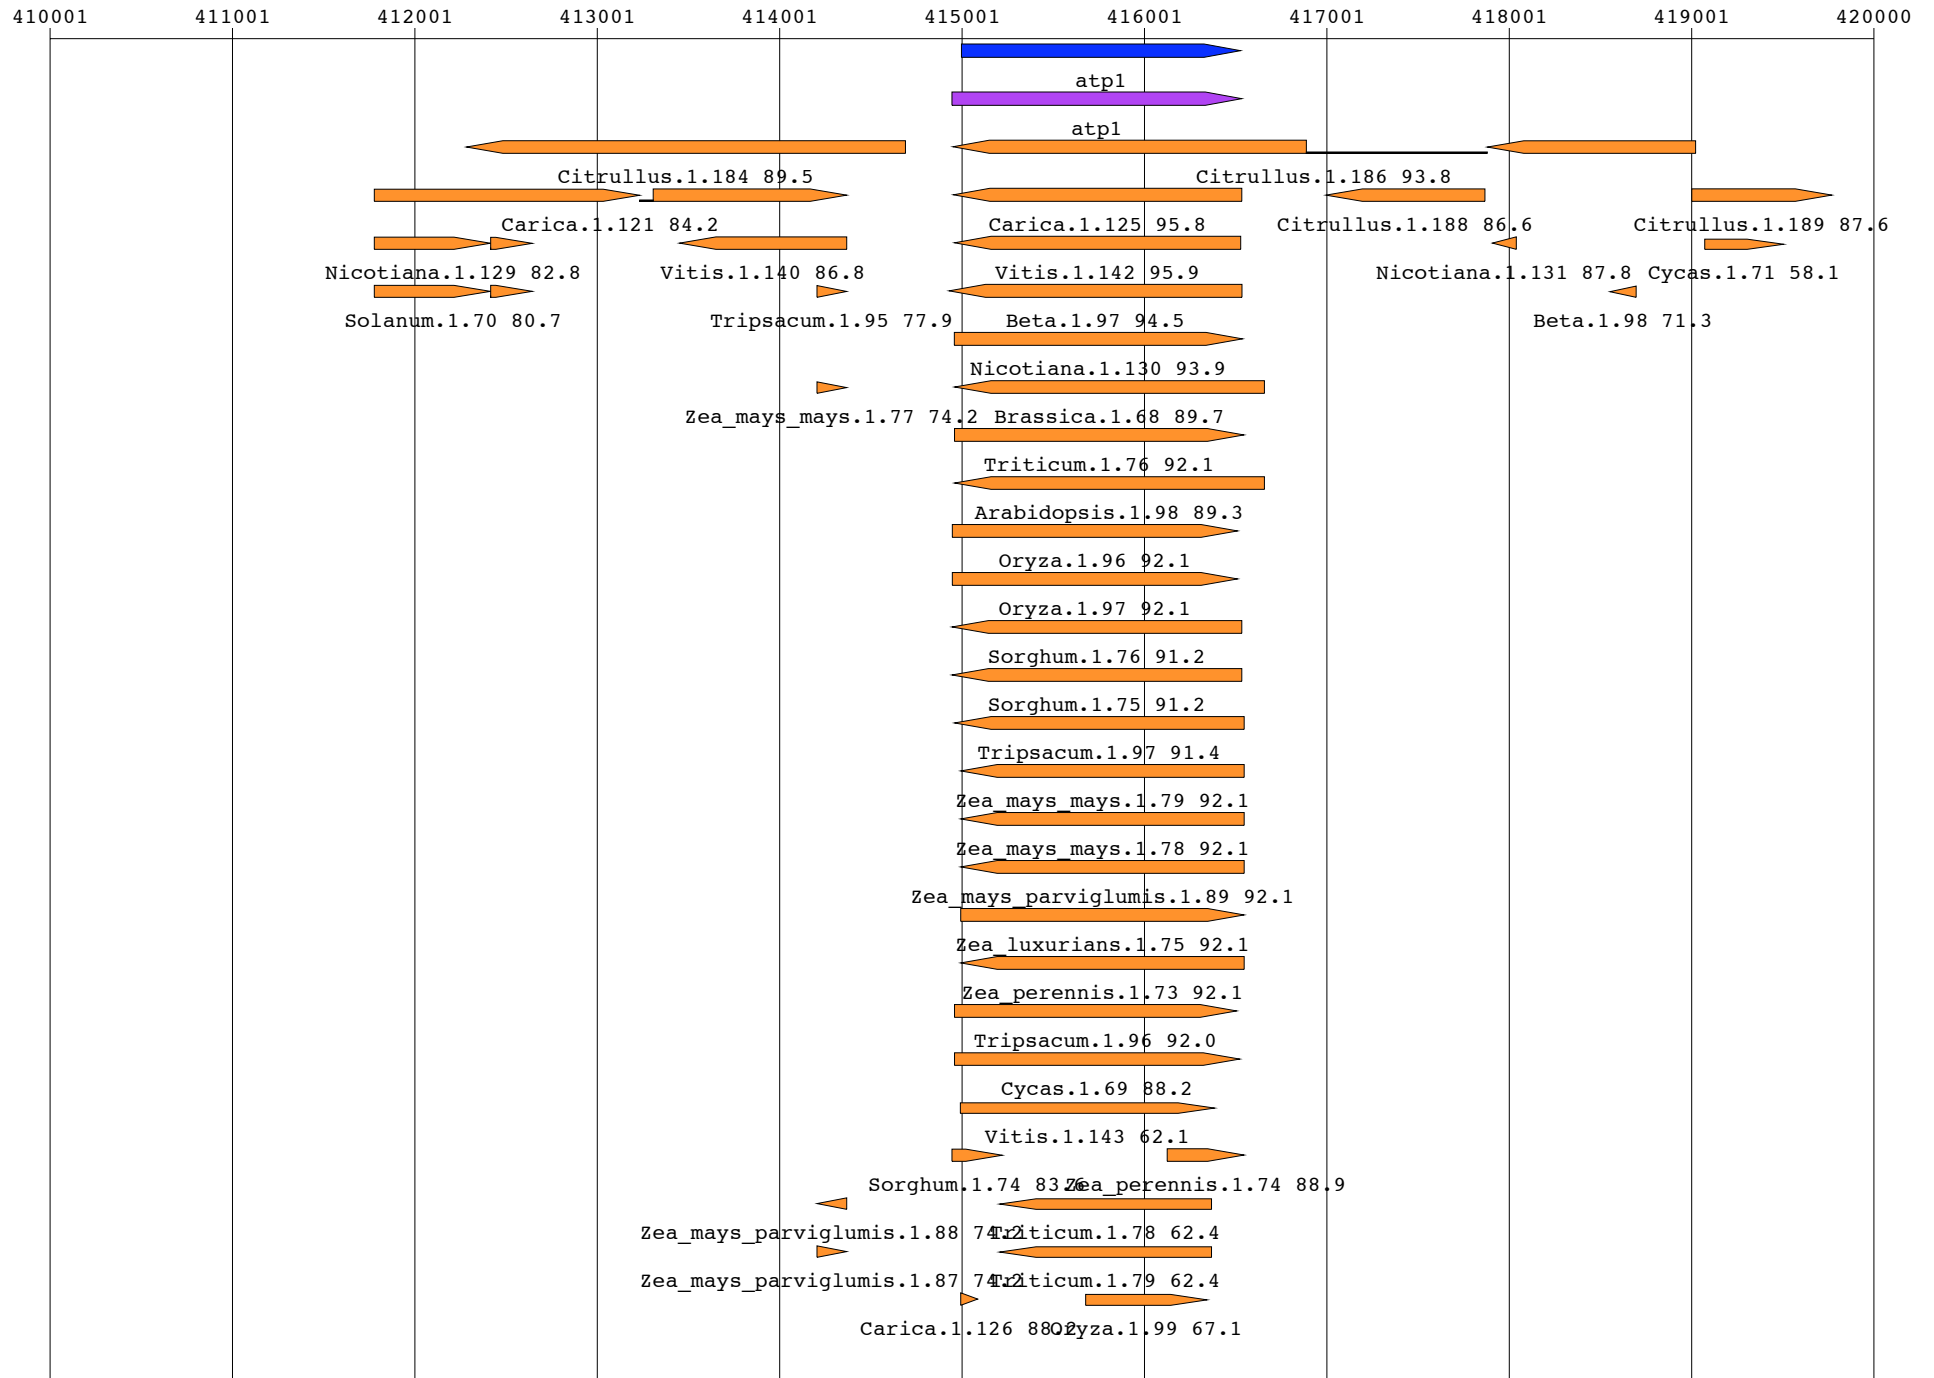

sequence: Cucurbita length: 982833

420001      421001      422001      423001      424001      425001      426001      427001      428001      429001      430000

▲  
Citrullus.1.190 81.4  
▲  
Citrullus.1.191 74.1  
▲  
Citrullus.1.192 70.1

sequence: Cucurbita length: 982833

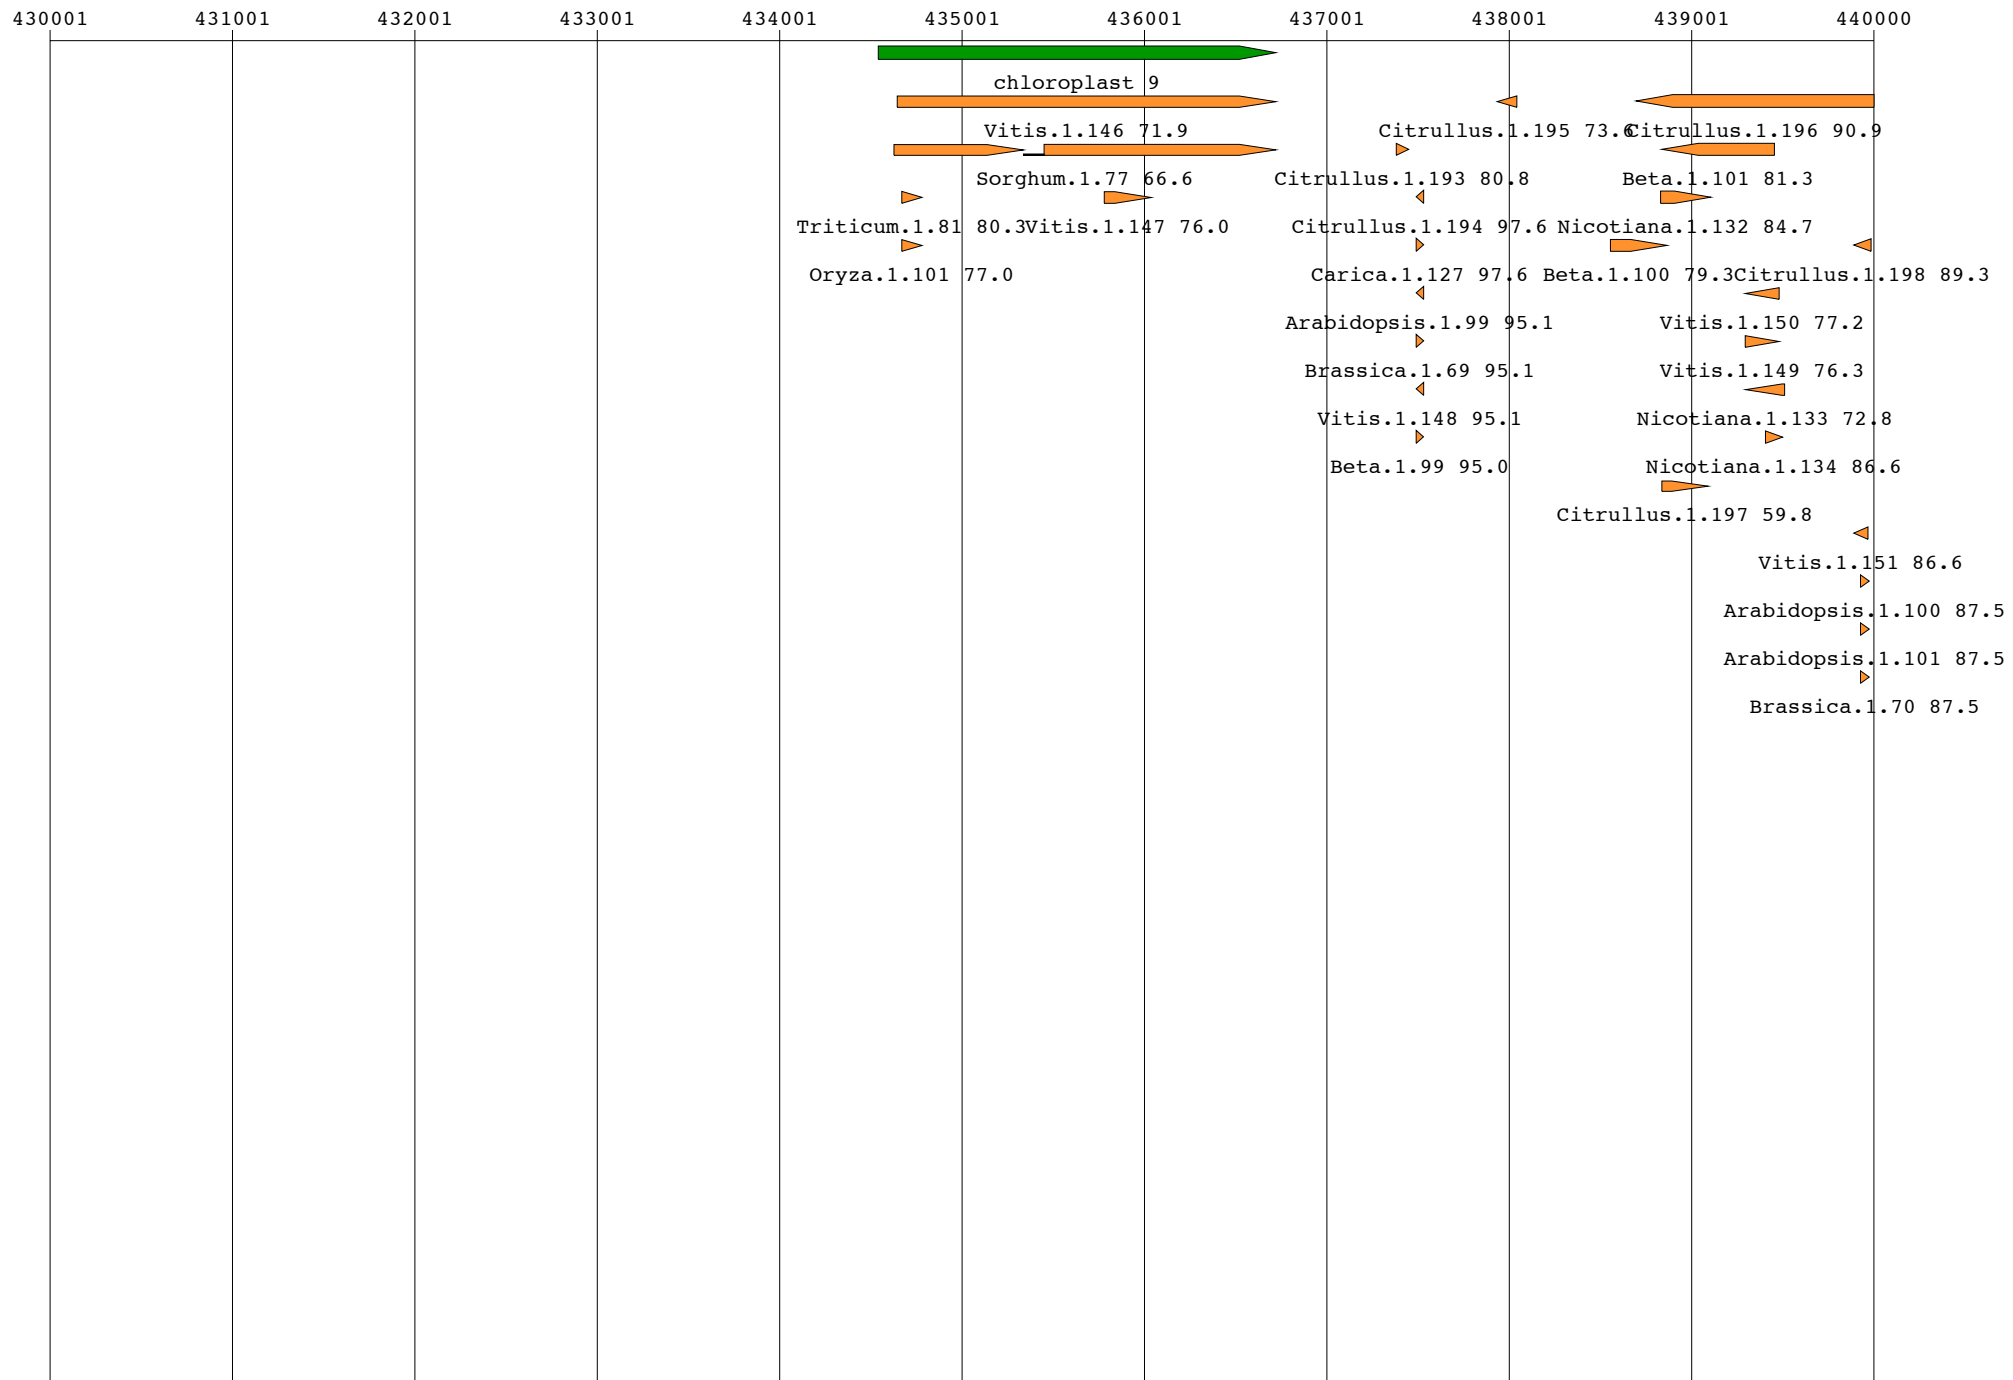

sequence: Cucurbita length: 982833

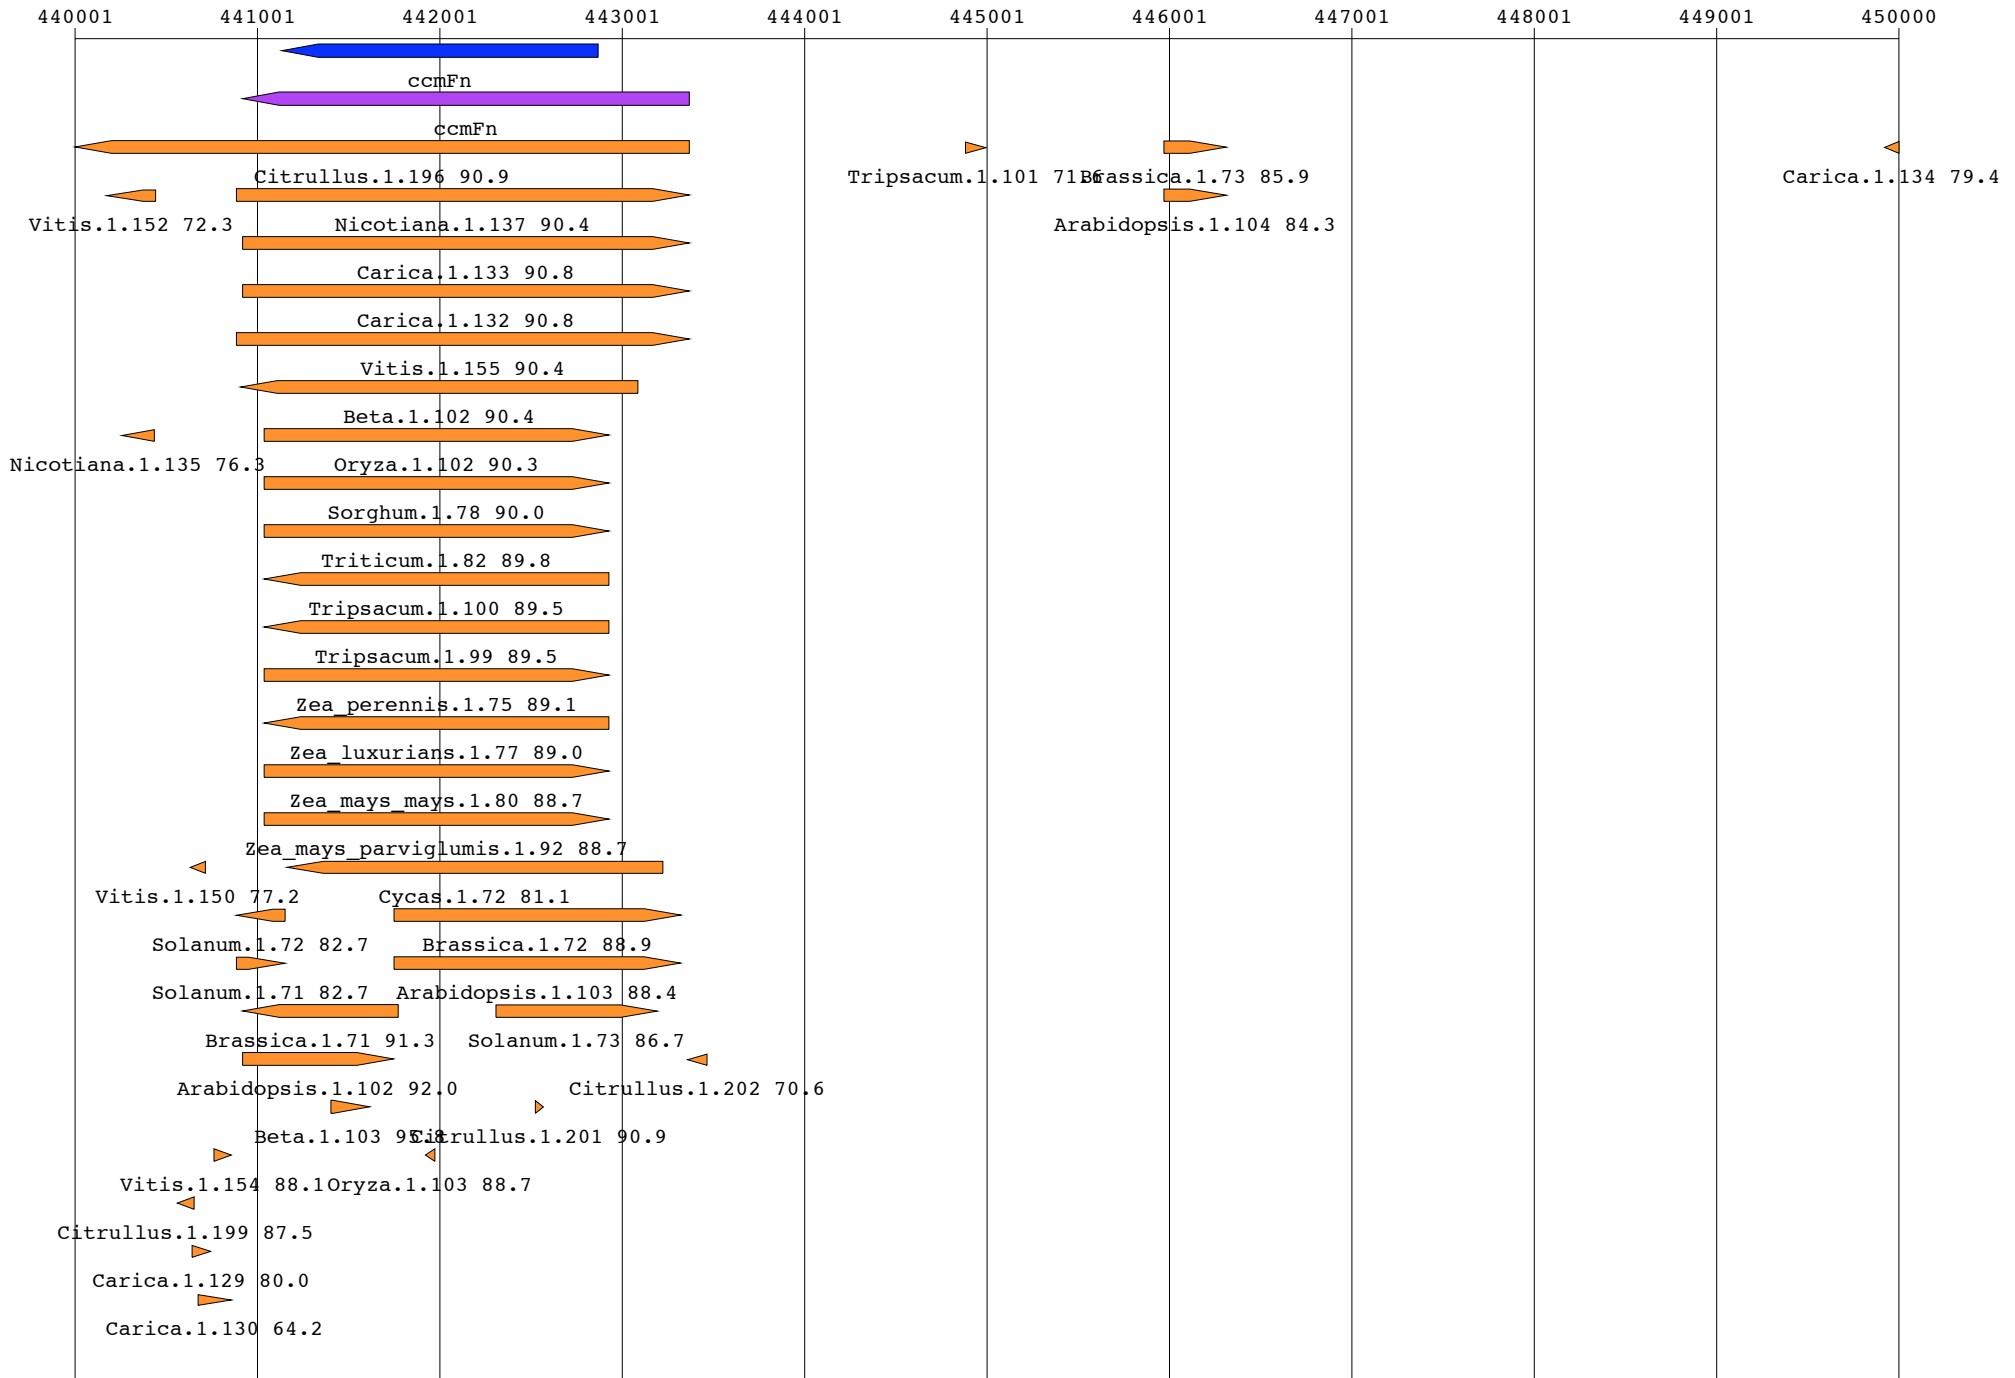

sequence: Cucurbita length: 982833

450001 451001 452001 453001 454001 455001 456001 457001 458001 459001 460000

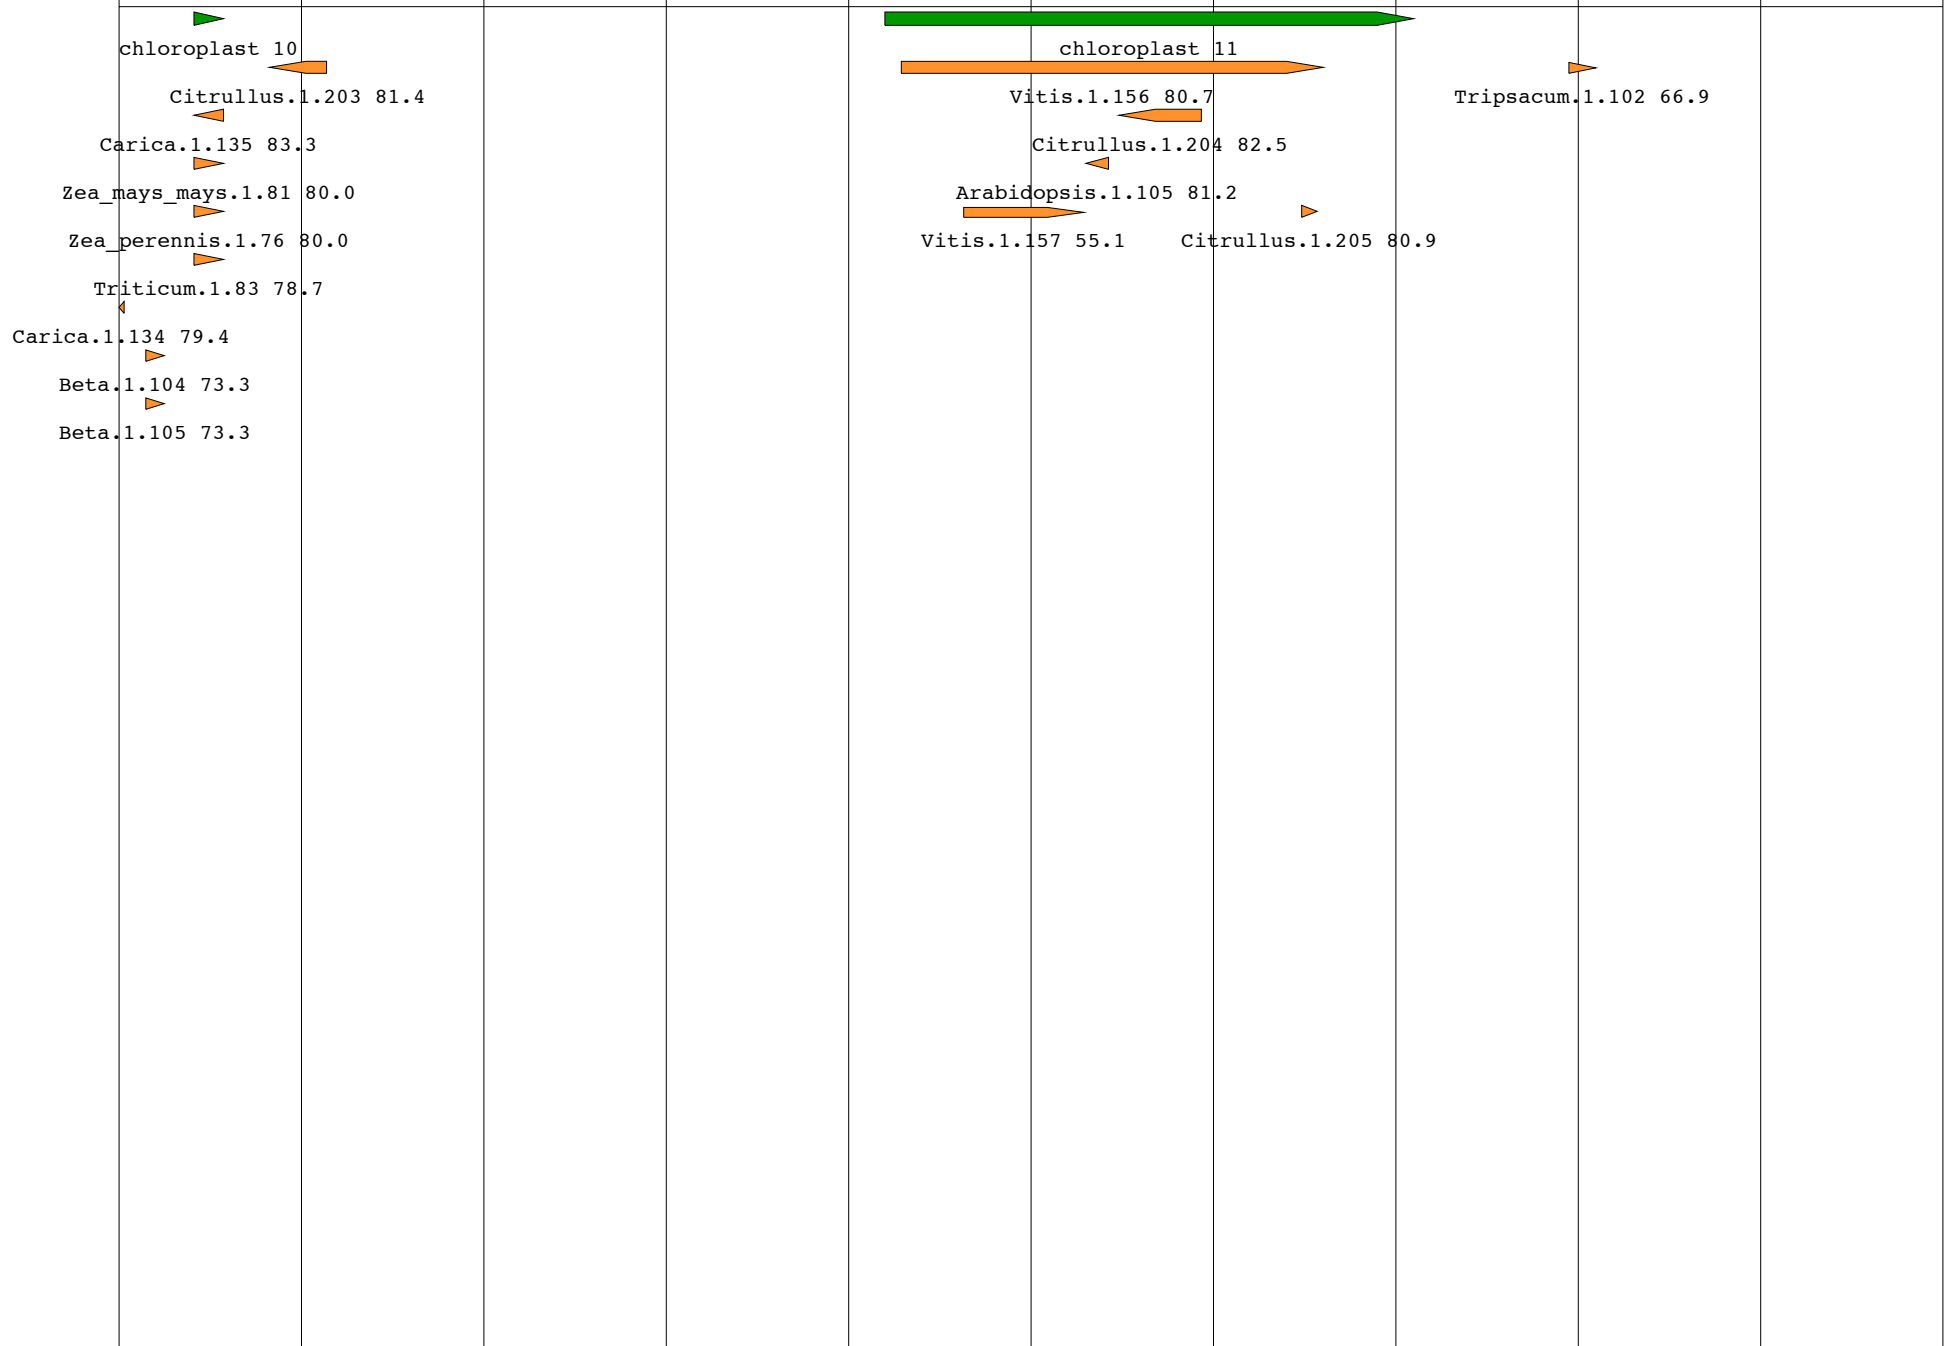

sequence: Cucurbita length: 982833

460001      461001      462001      463001      464001      465001      466001      467001      468001      469001      470000

 Citrullus.1.206 87.5

sequence: Cucurbita length: 982833

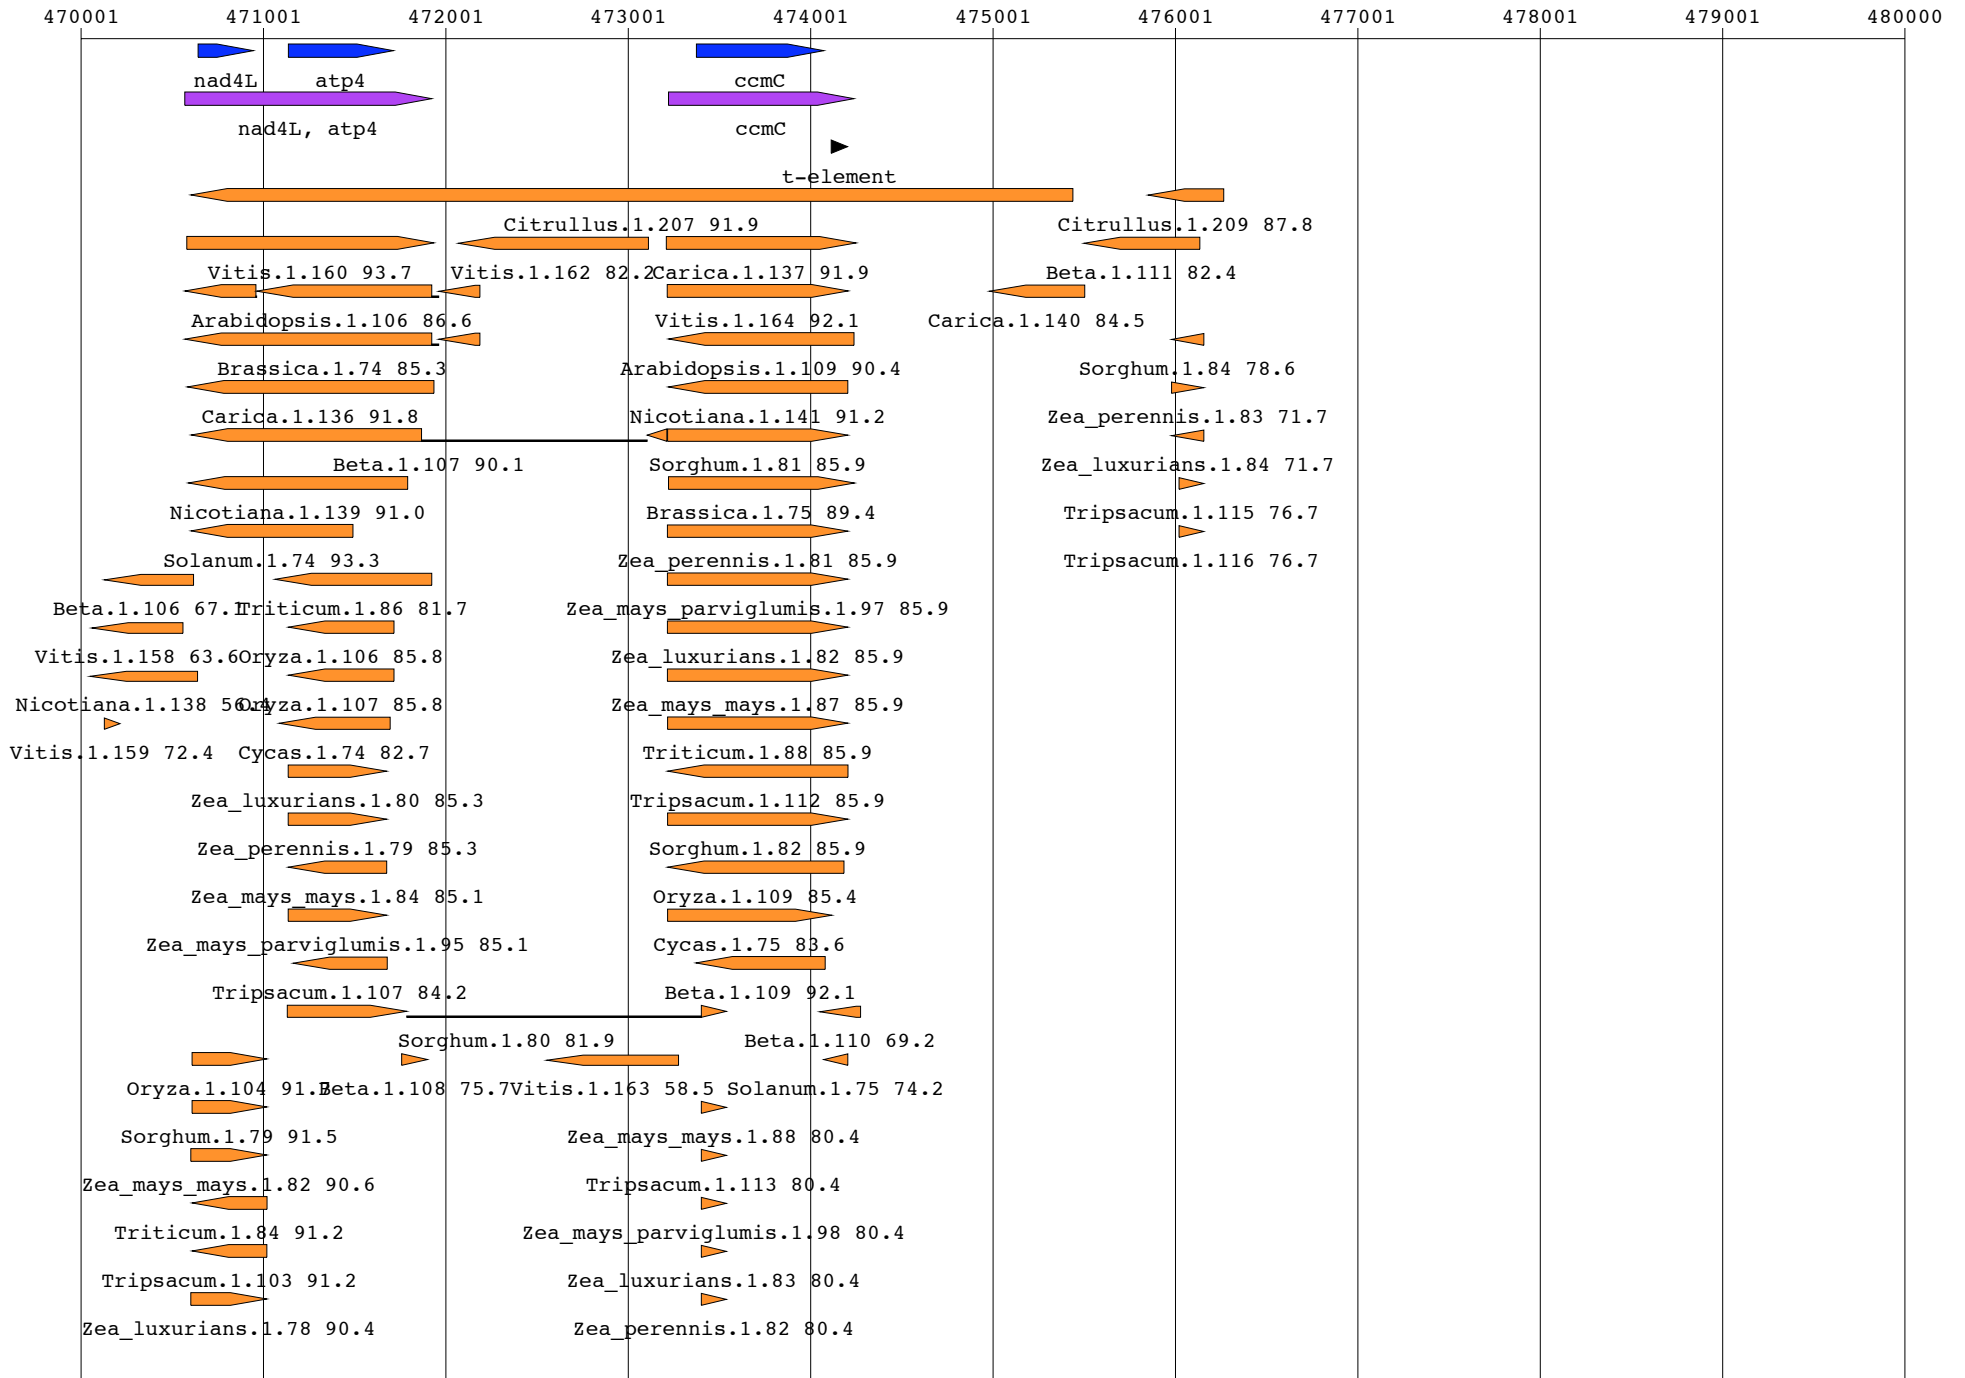



sequence: Cucurbita length: 982833

480001      481001      482001      483001      484001      485001      486001      487001      488001      489001      490000

orf144

Nicotiana.1.143 88.8

Vitis.1.166 78.2

Citrullus.1.210 88.8

Vitis.1.167 73.4

Vitis.1.168 77.2

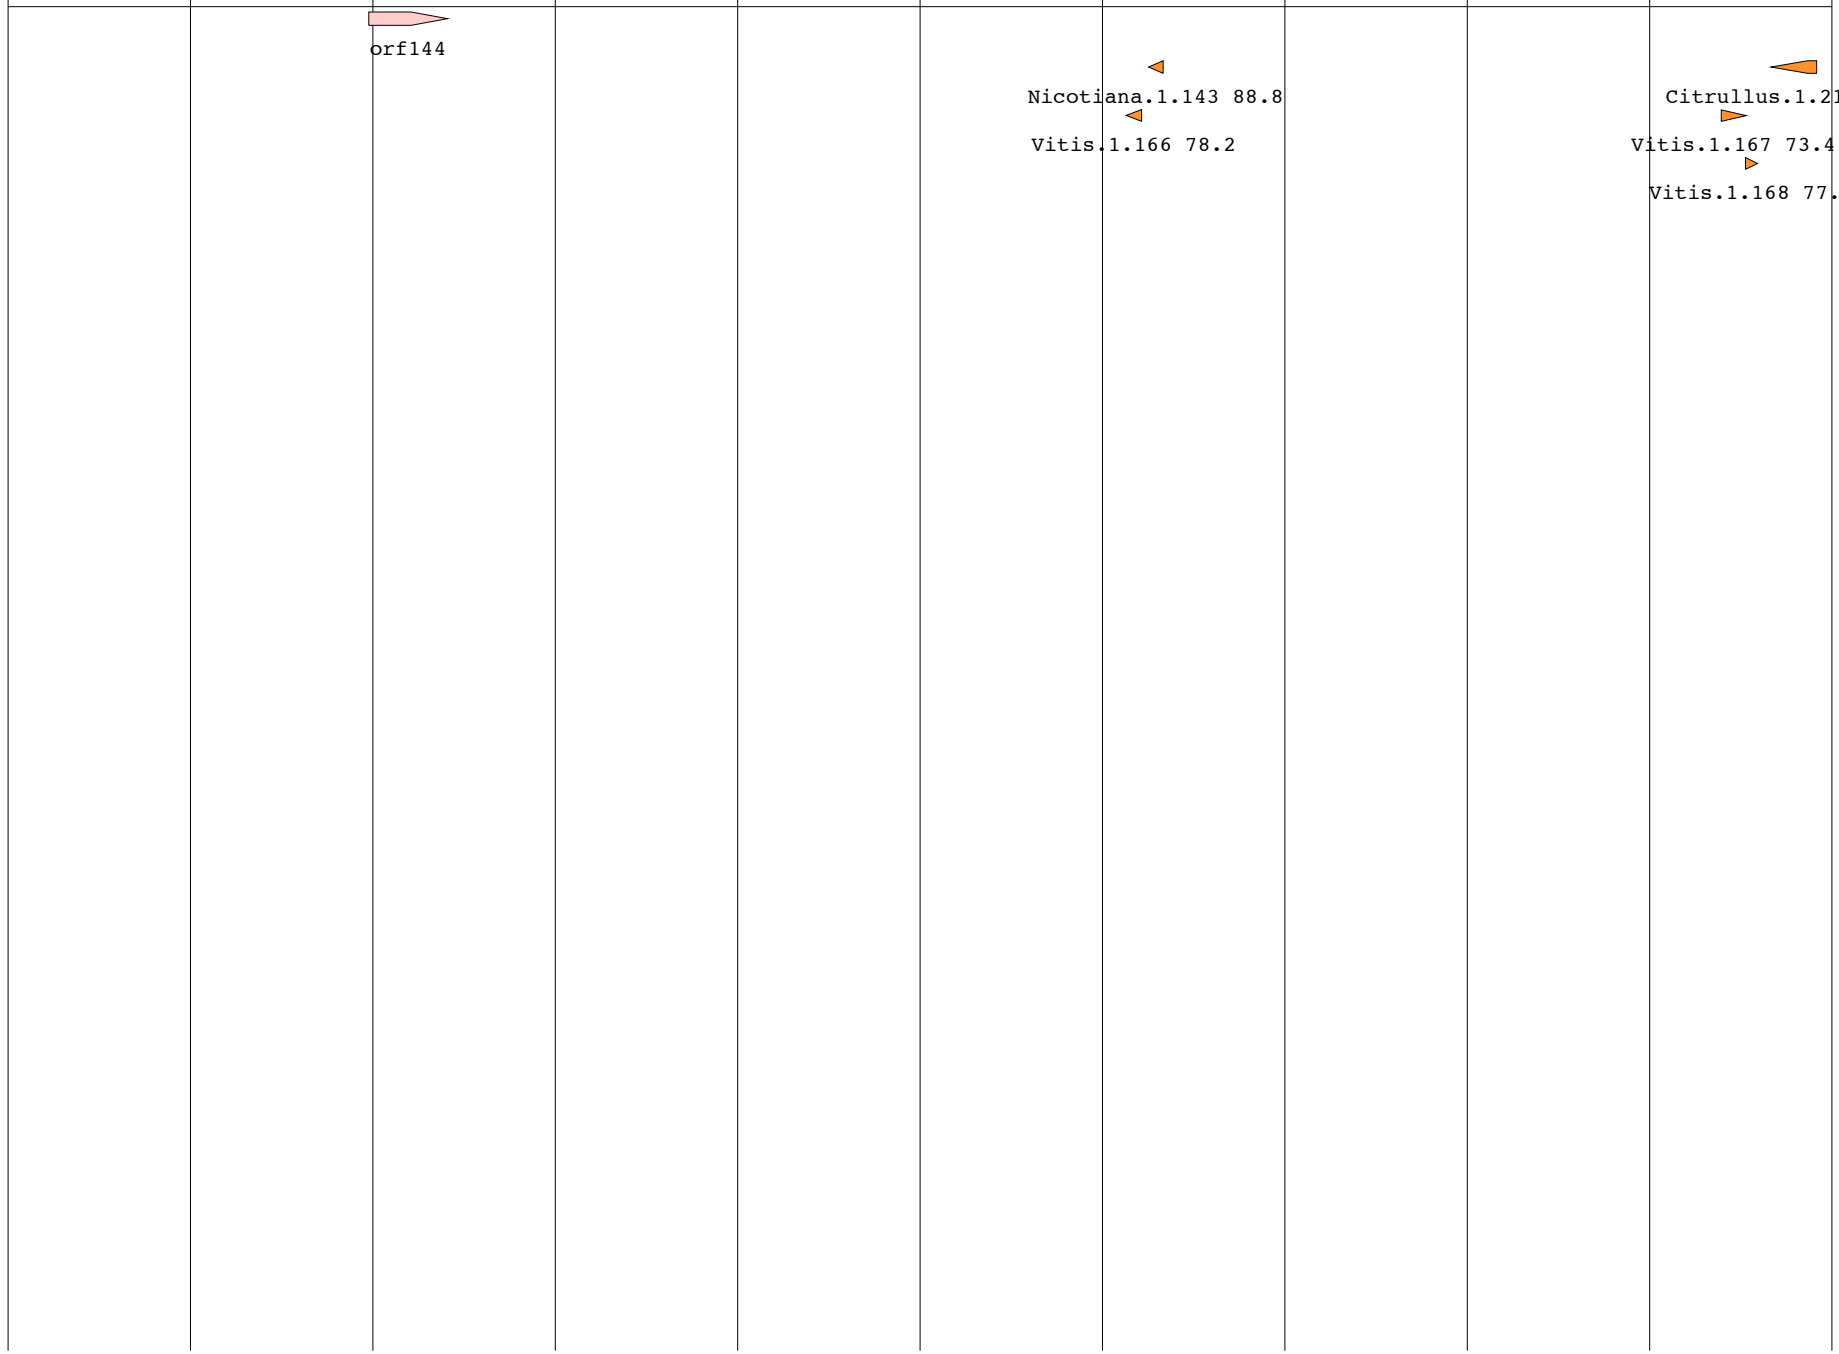

sequence: Cucurbita length: 982833

490001      491001      492001      493001      494001      495001      496001      497001      498001      499001      500000

Citrullus.1.211 89.7

Citrullus.1.212 88.1

Nicotiana.1.144 73.5

Arabidopsis.1.110 82.9

Citrullus.1.213 78.0

Arabidopsis.1.111 82.9

Brassica.1.76 87.8

Vitis.1.169 77.1

Beta.1.112 94.2

sequence: Cucurbita length: 982833

500001 501001 502001 503001 504001 505001 506001 507001 508001 509001 510000

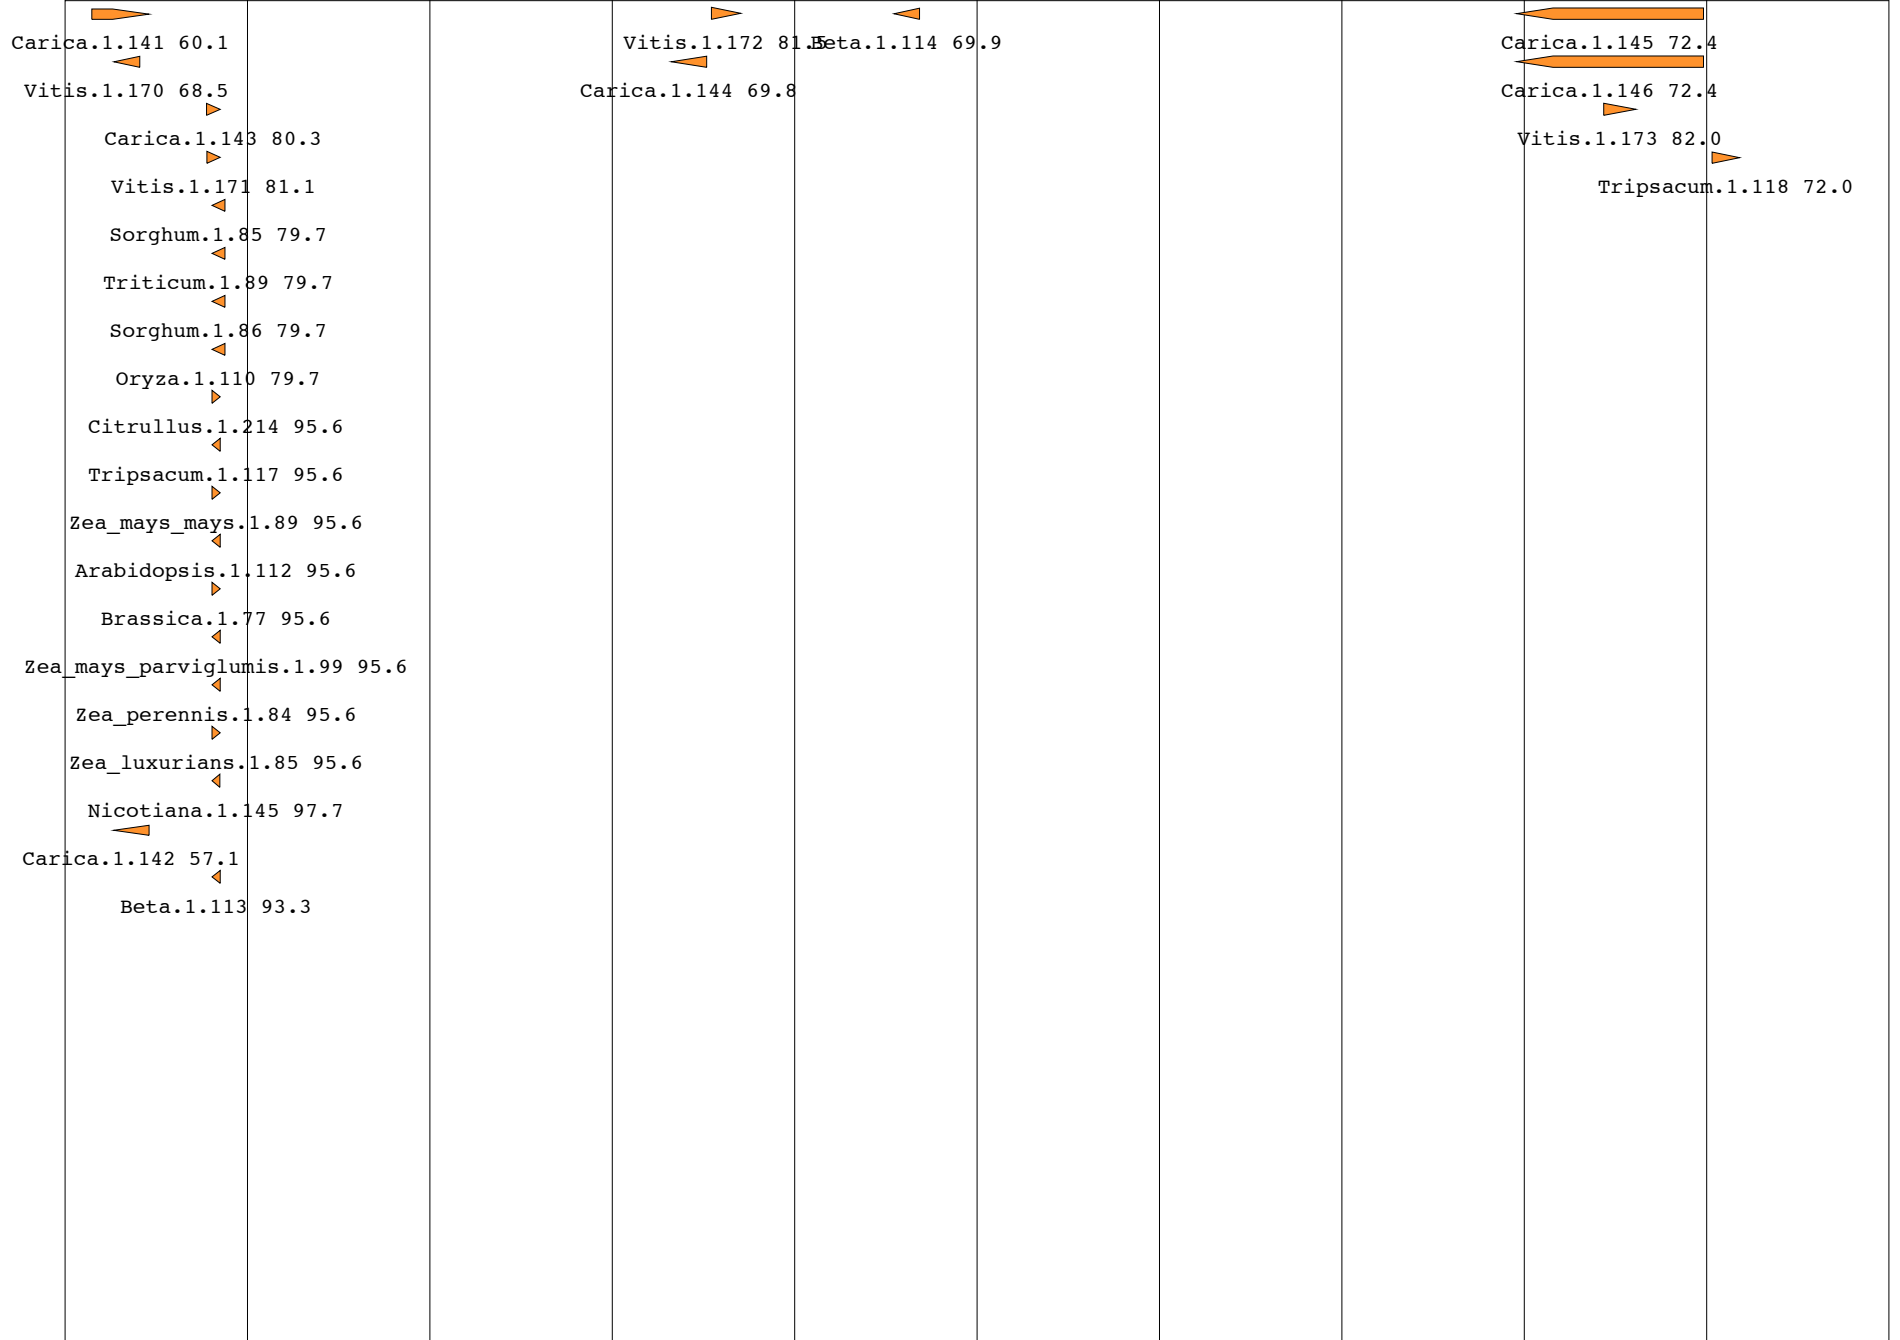

sequence: Cucurbita length: 982833

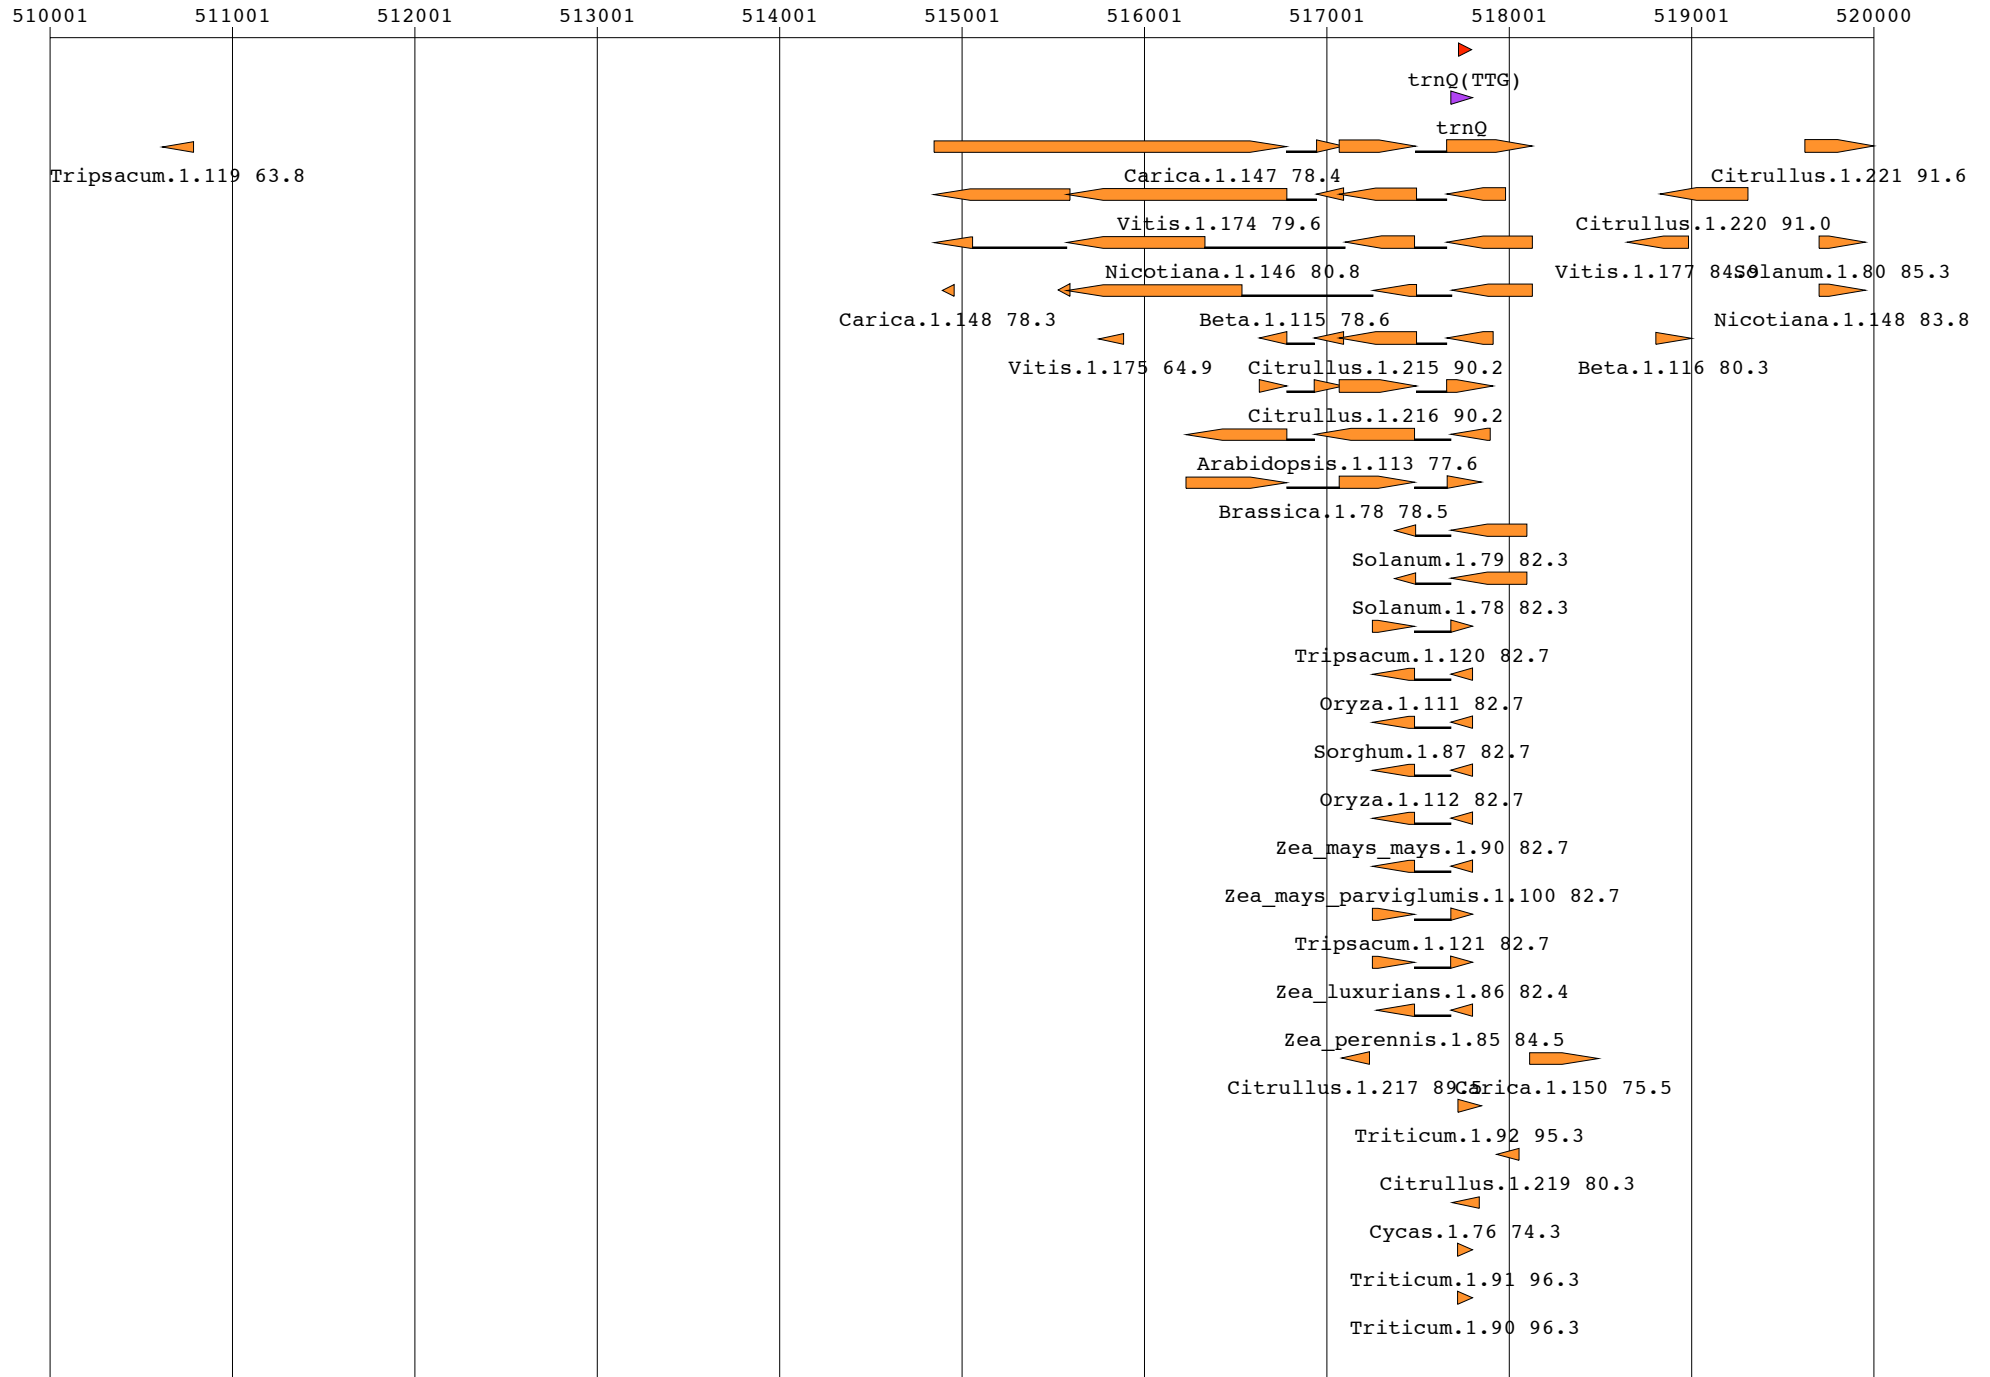

sequence: Cucurbita length: 982833

520001 521001 522001 523001 524001 525001 526001 527001 528001 529001 530000

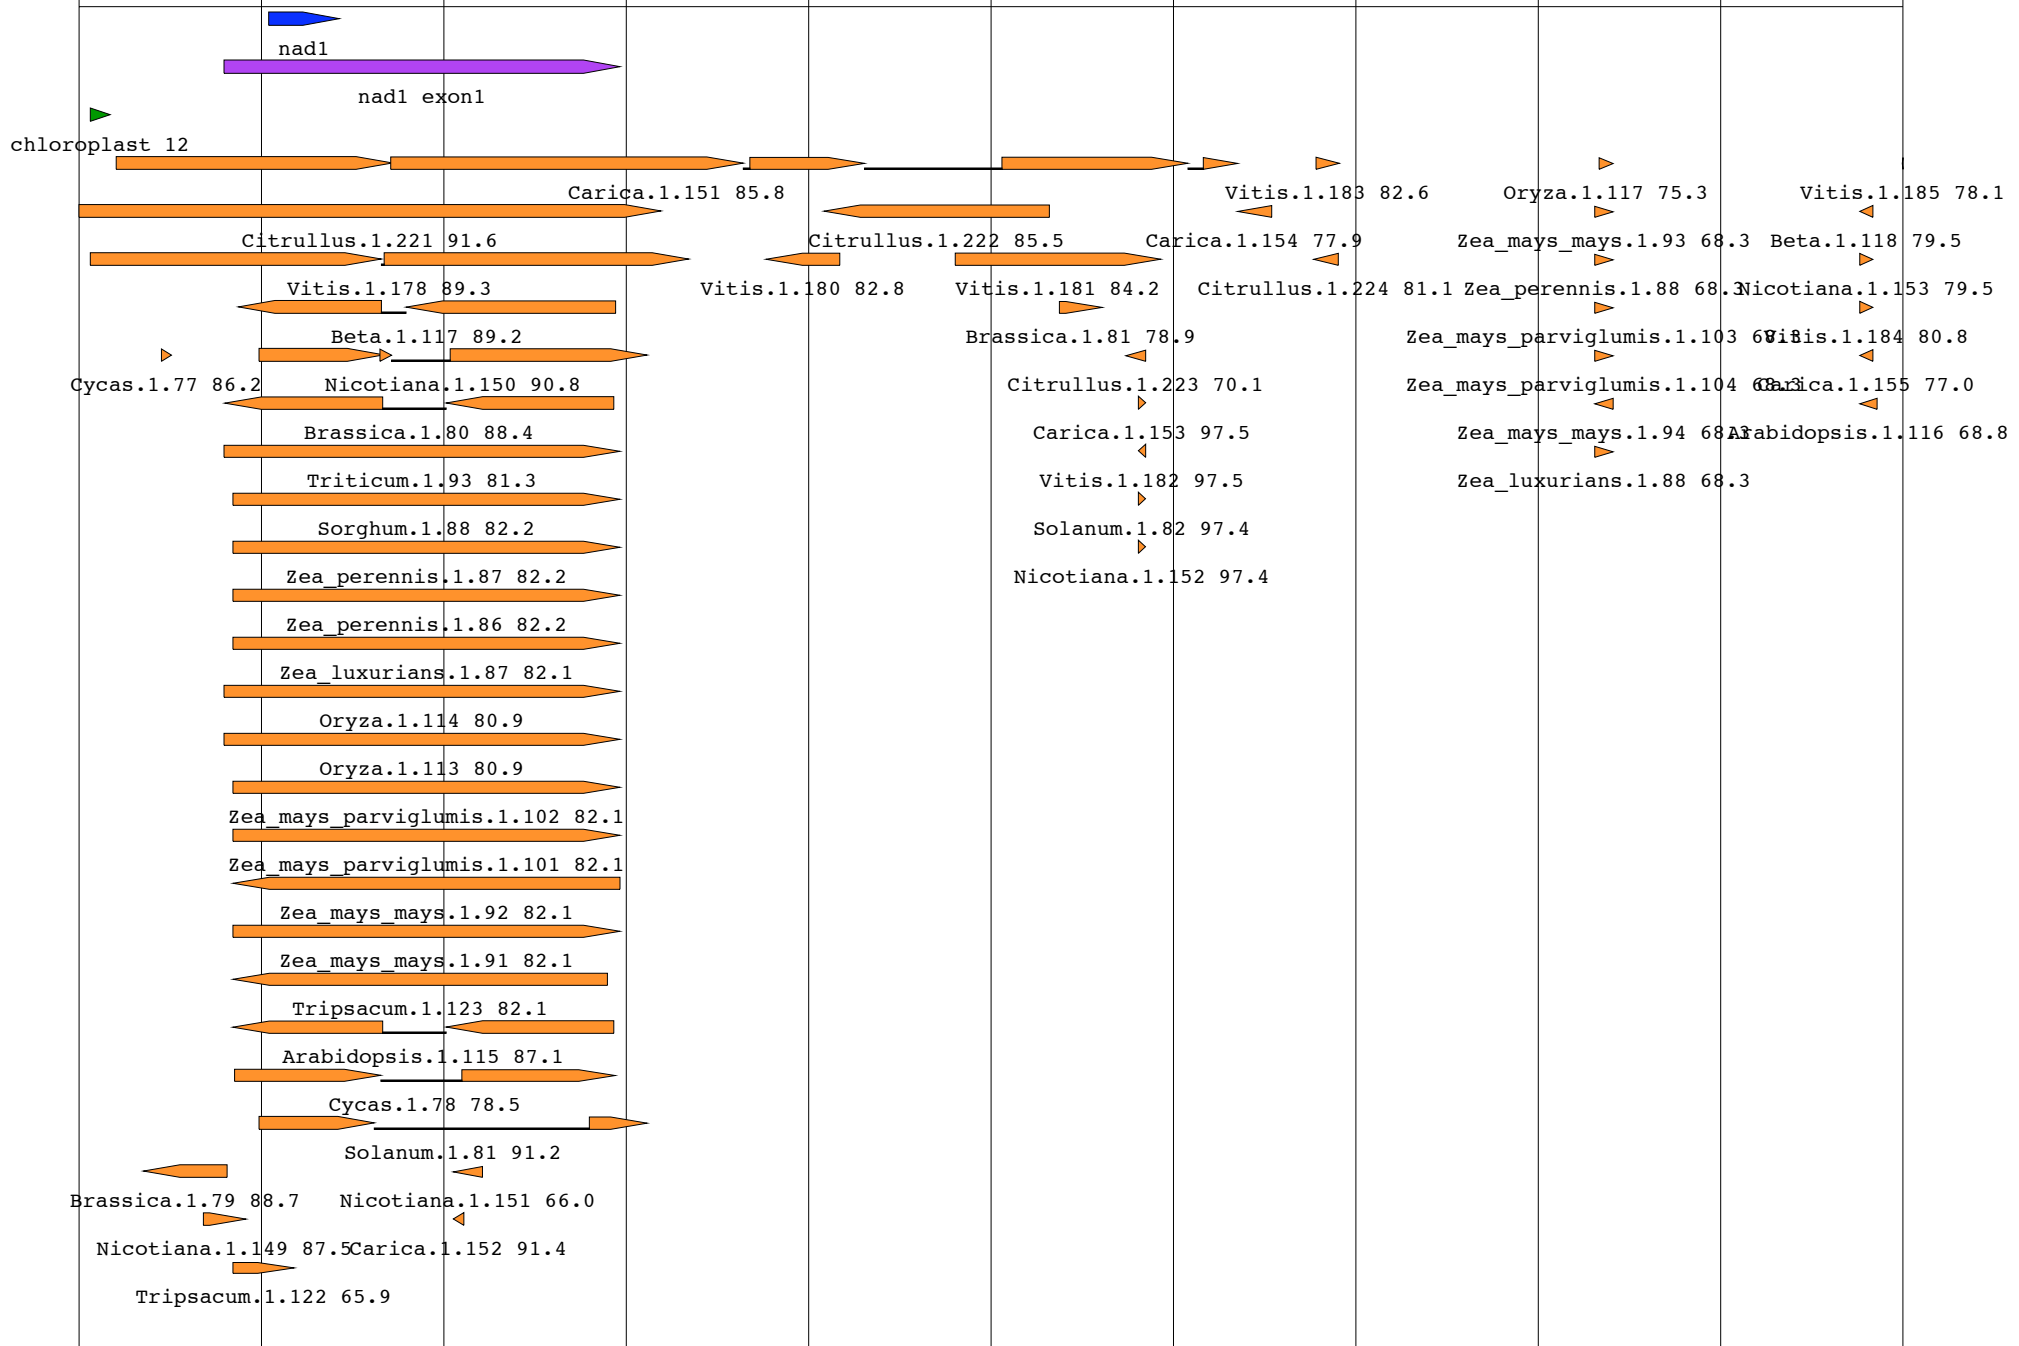

sequence: Cucurbita length: 982833

530001      531001      532001      533001      534001      535001      536001      537001      538001      539001      540000

Vitis.1.185 78.1

Beta.1.119 81.2

sequence: Cucurbita length: 982833

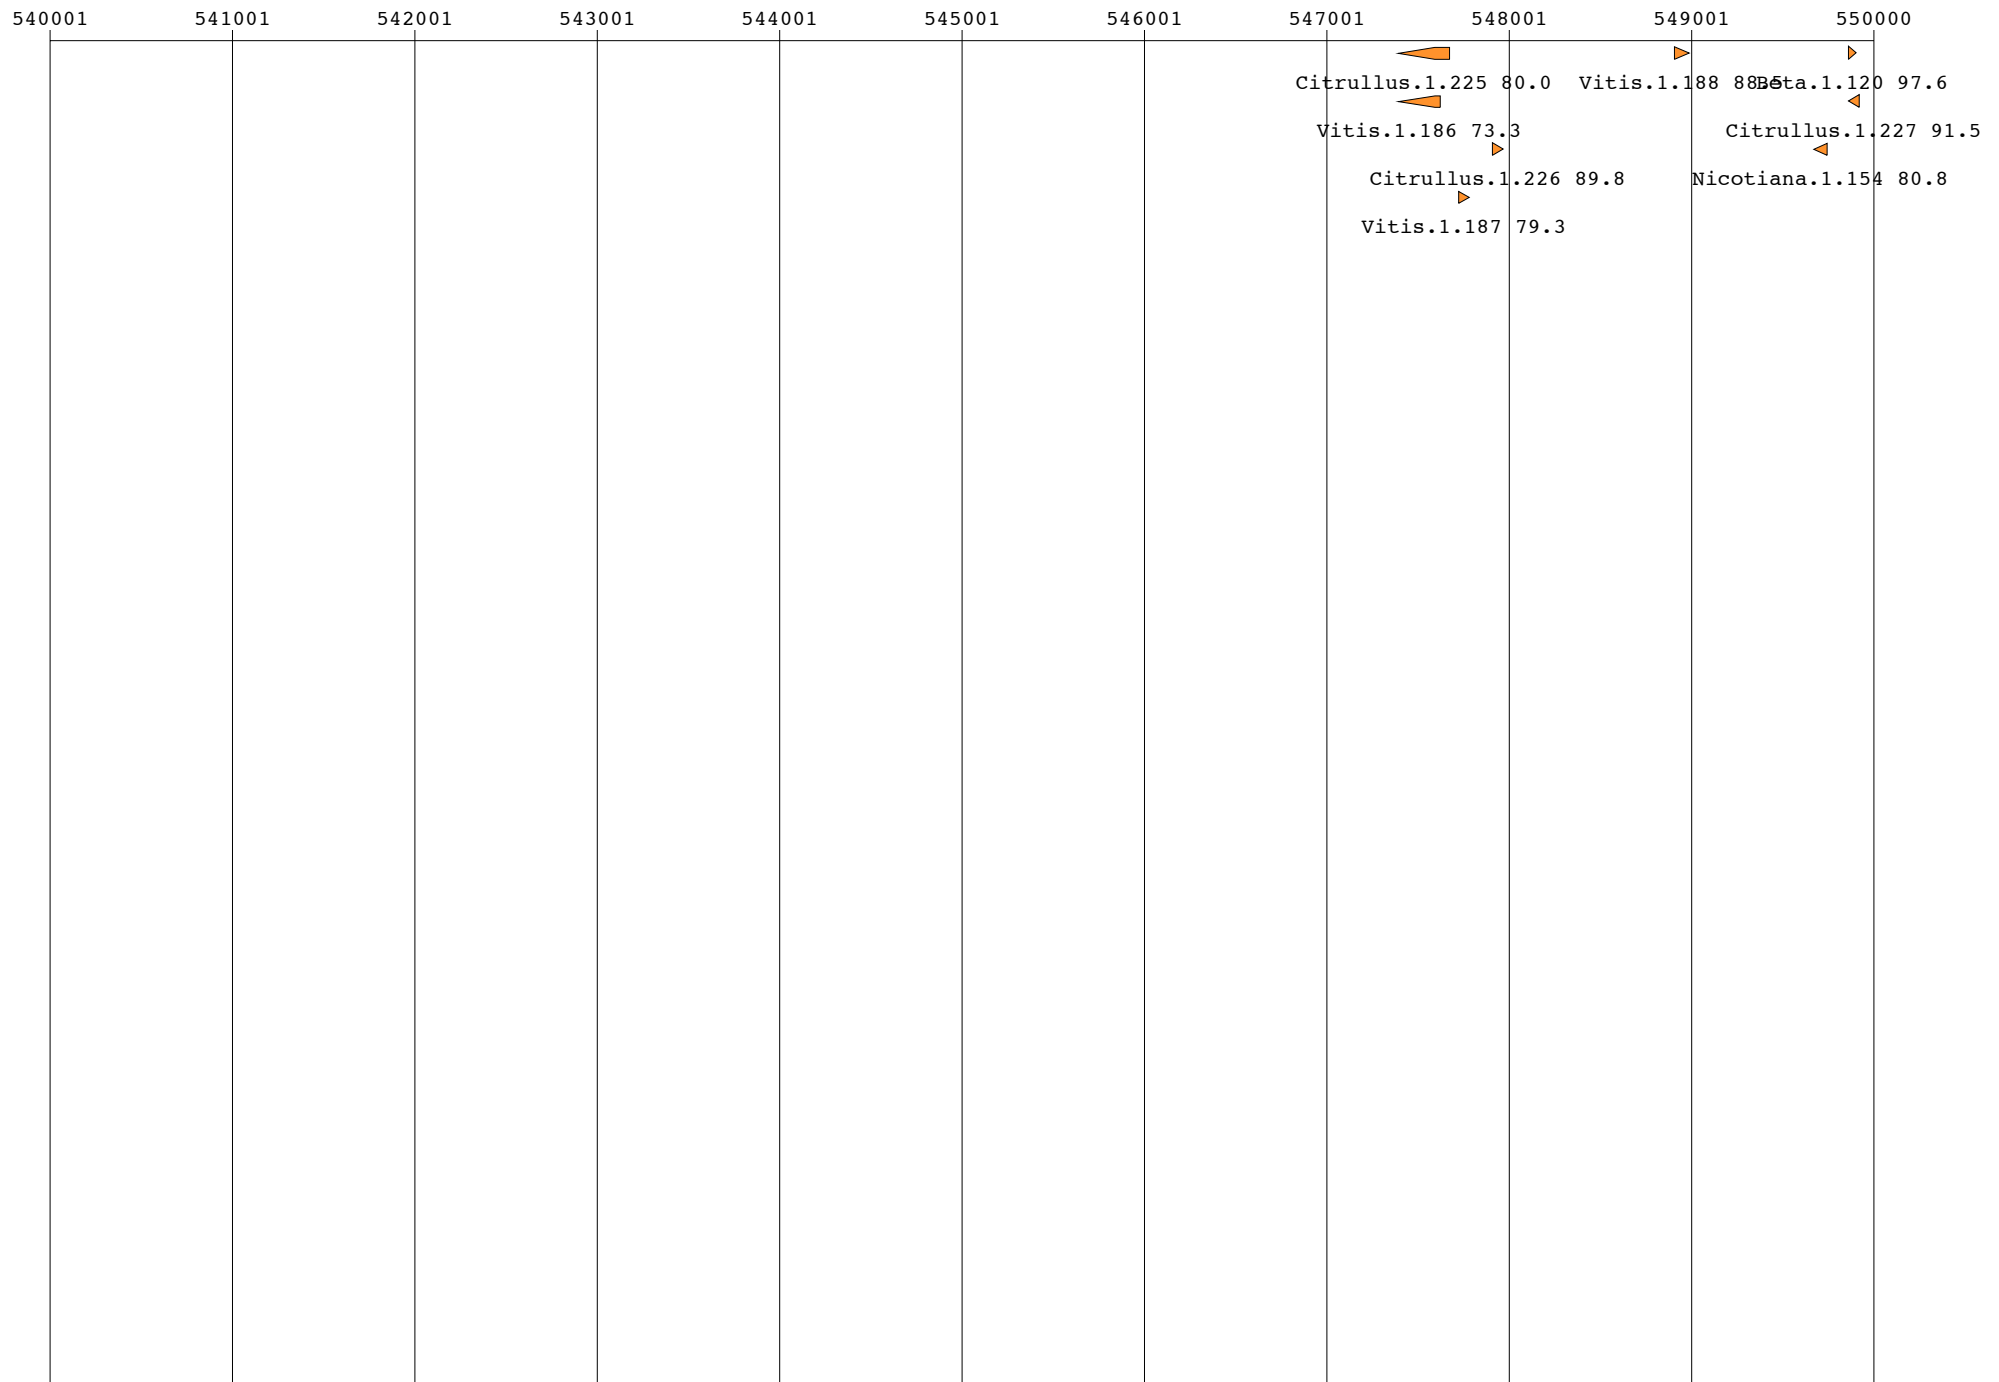

sequence: Cucurbita length: 982833

550001      551001      552001      553001      554001      555001      556001      557001      558001      559001      560000

Arabis.1.117 73.5

Beta.1.121 70.6

Vitis.1.189 87.0

Beta.1.122 93.5

Carica.1.156 86.3

Citrullus.1.228 70.5



sequence: Cucurbita length: 982833

560001 561001 562001 563001 564001 565001 566001 567001 568001 569001 570000

orf101-1

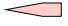



sequence: Cucurbita length: 982833

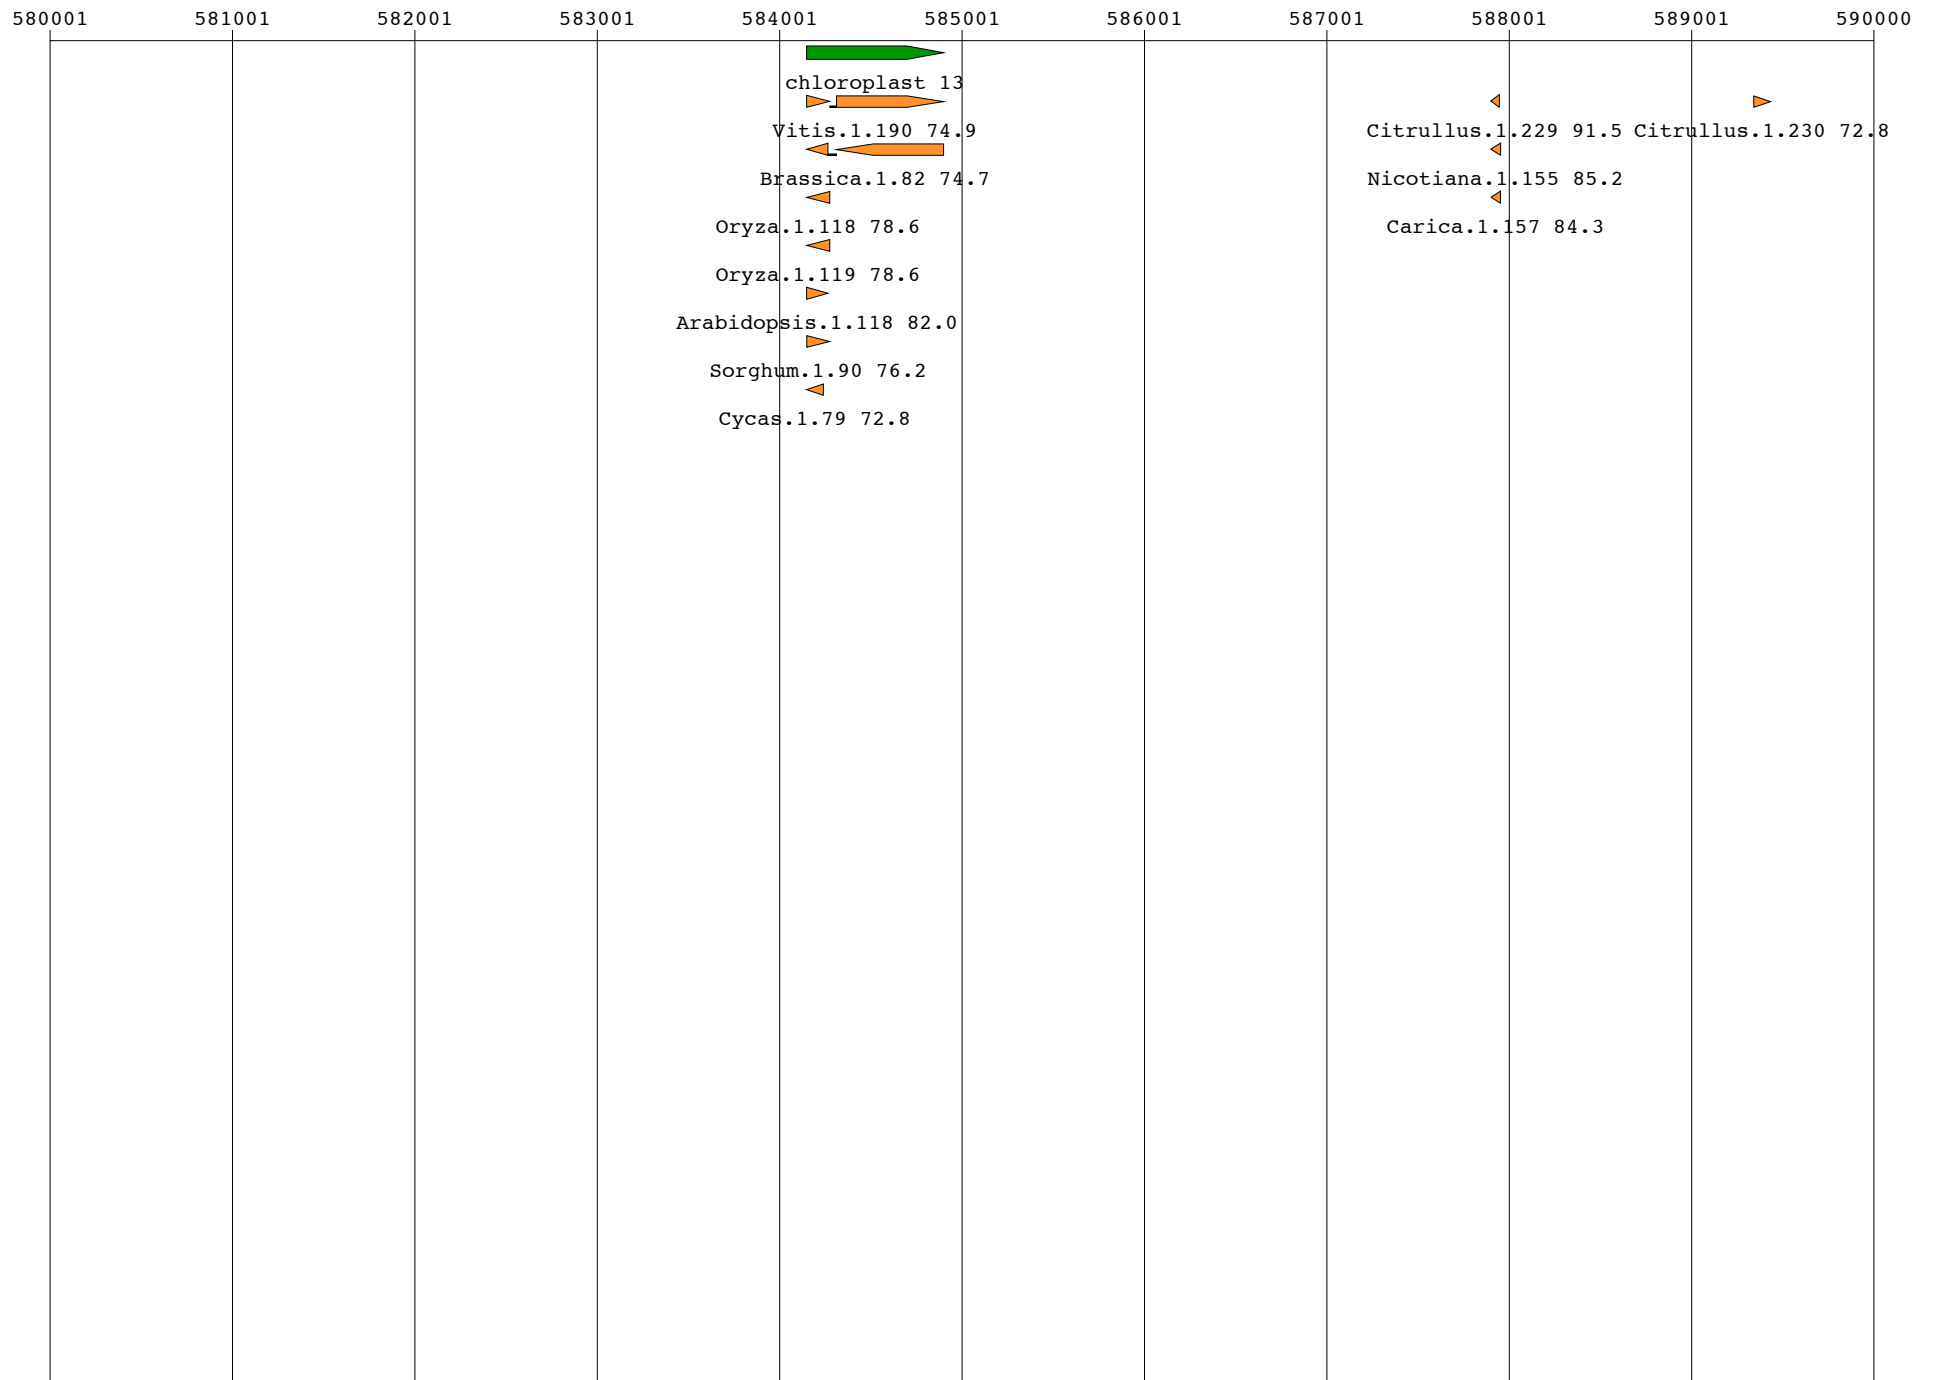

sequence: Cucurbita length: 982833

590001 591001 592001 593001 594001 595001 596001 597001 598001 599001 600000

  
orf100-2

  
Citrullus.1.231 73.6

sequence: Cucurbita length: 982833

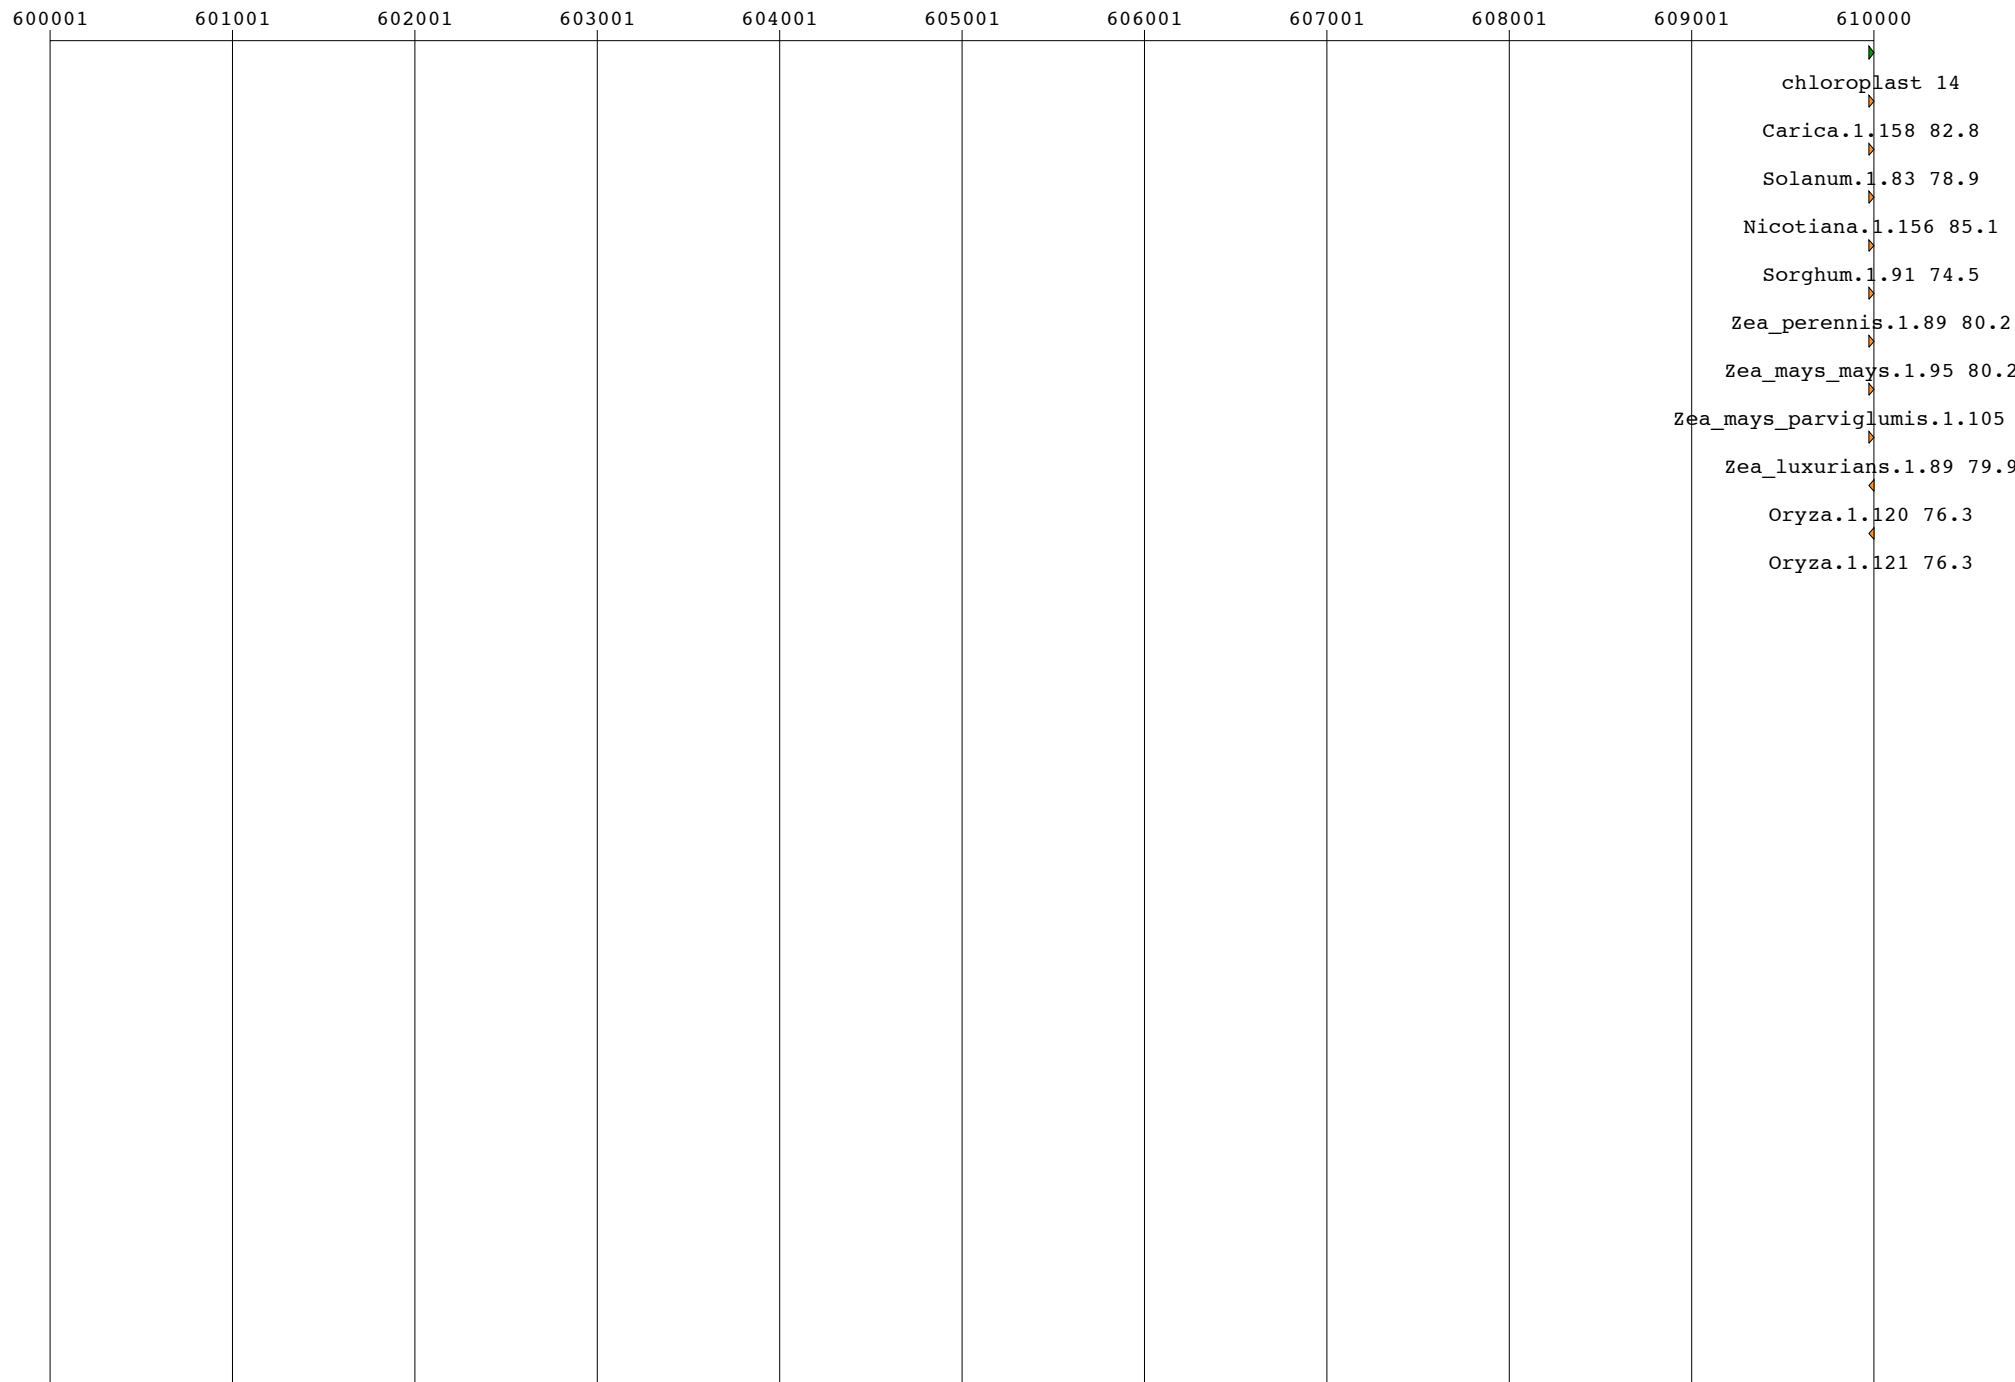

sequence: Cucurbita length: 982833

610001 611001 612001 613001 614001 615001 616001 617001 618001 619001 620000

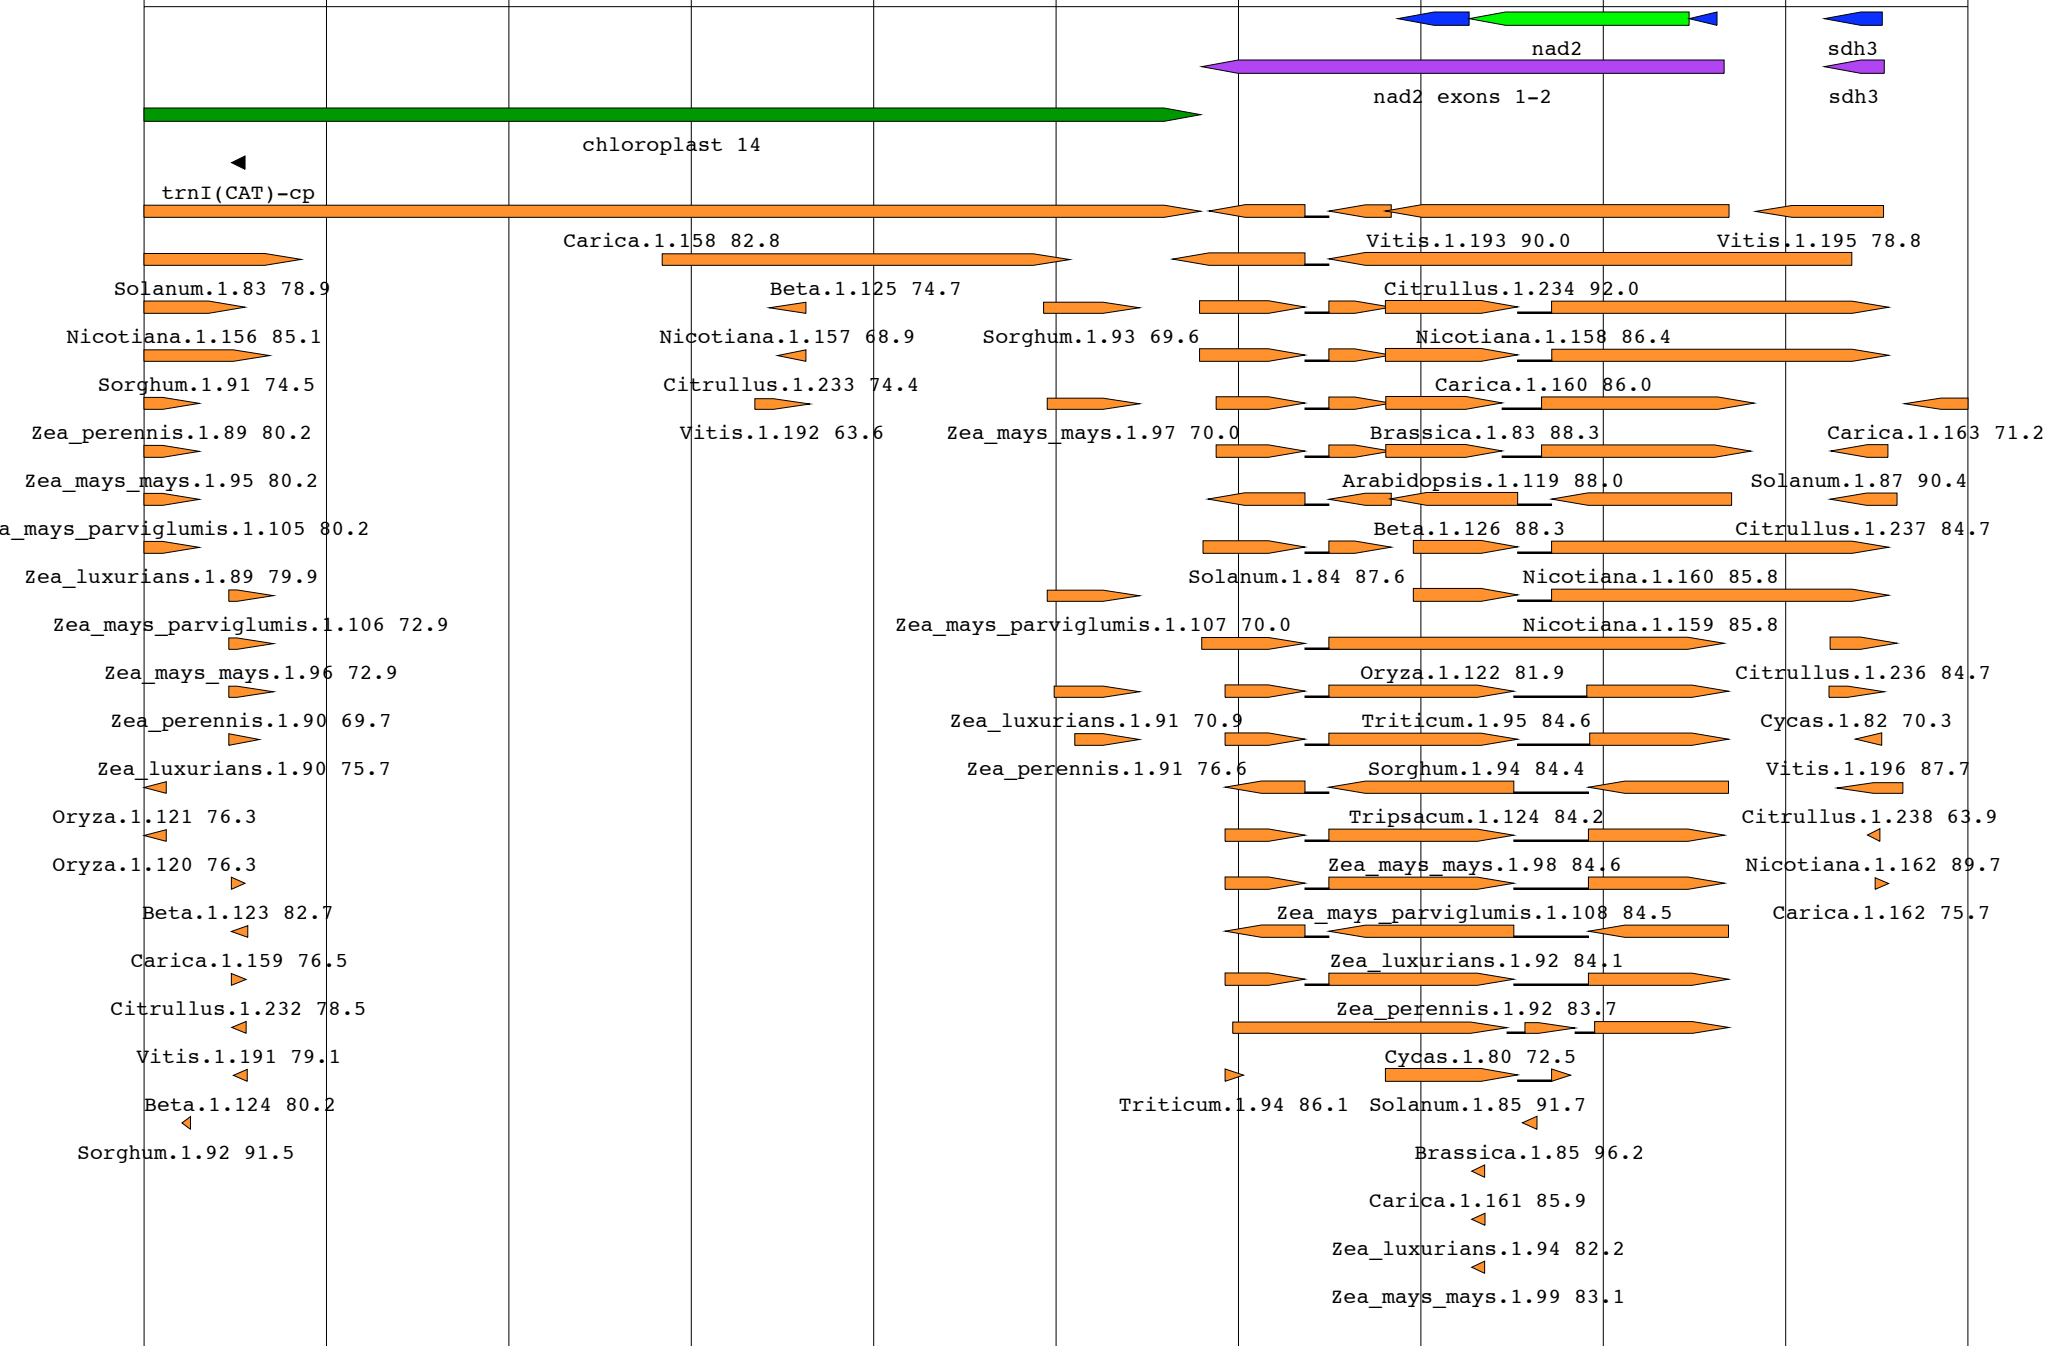

sequence: Cucurbita length: 982833

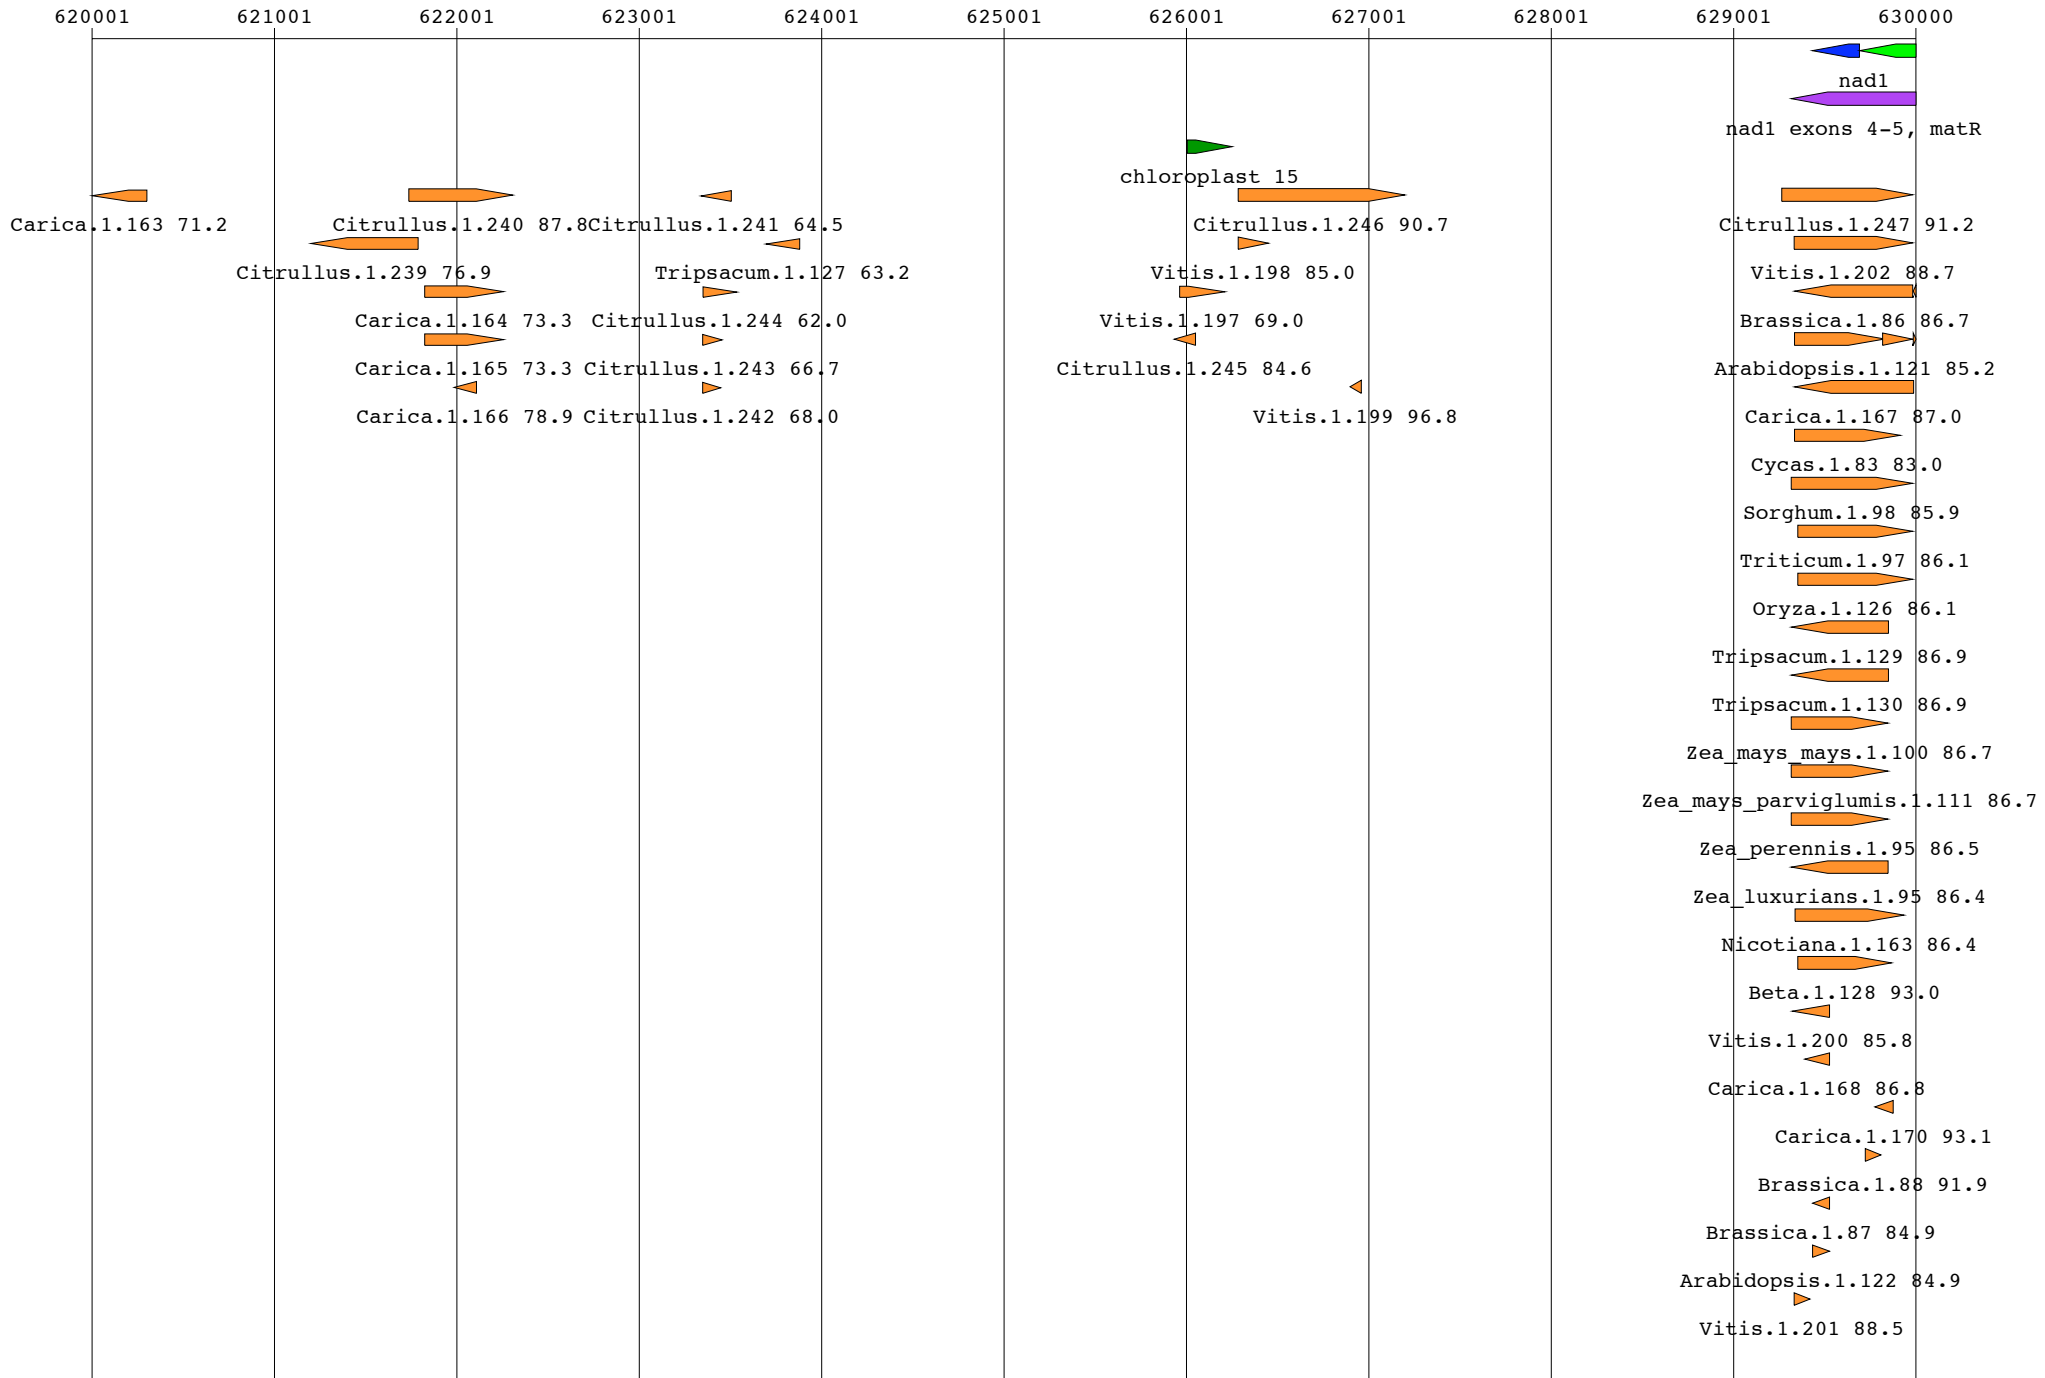

sequence: Cucurbita length: 982833

630001 631001 632001 633001 634001 635001 636001 637001 638001 639001 640000

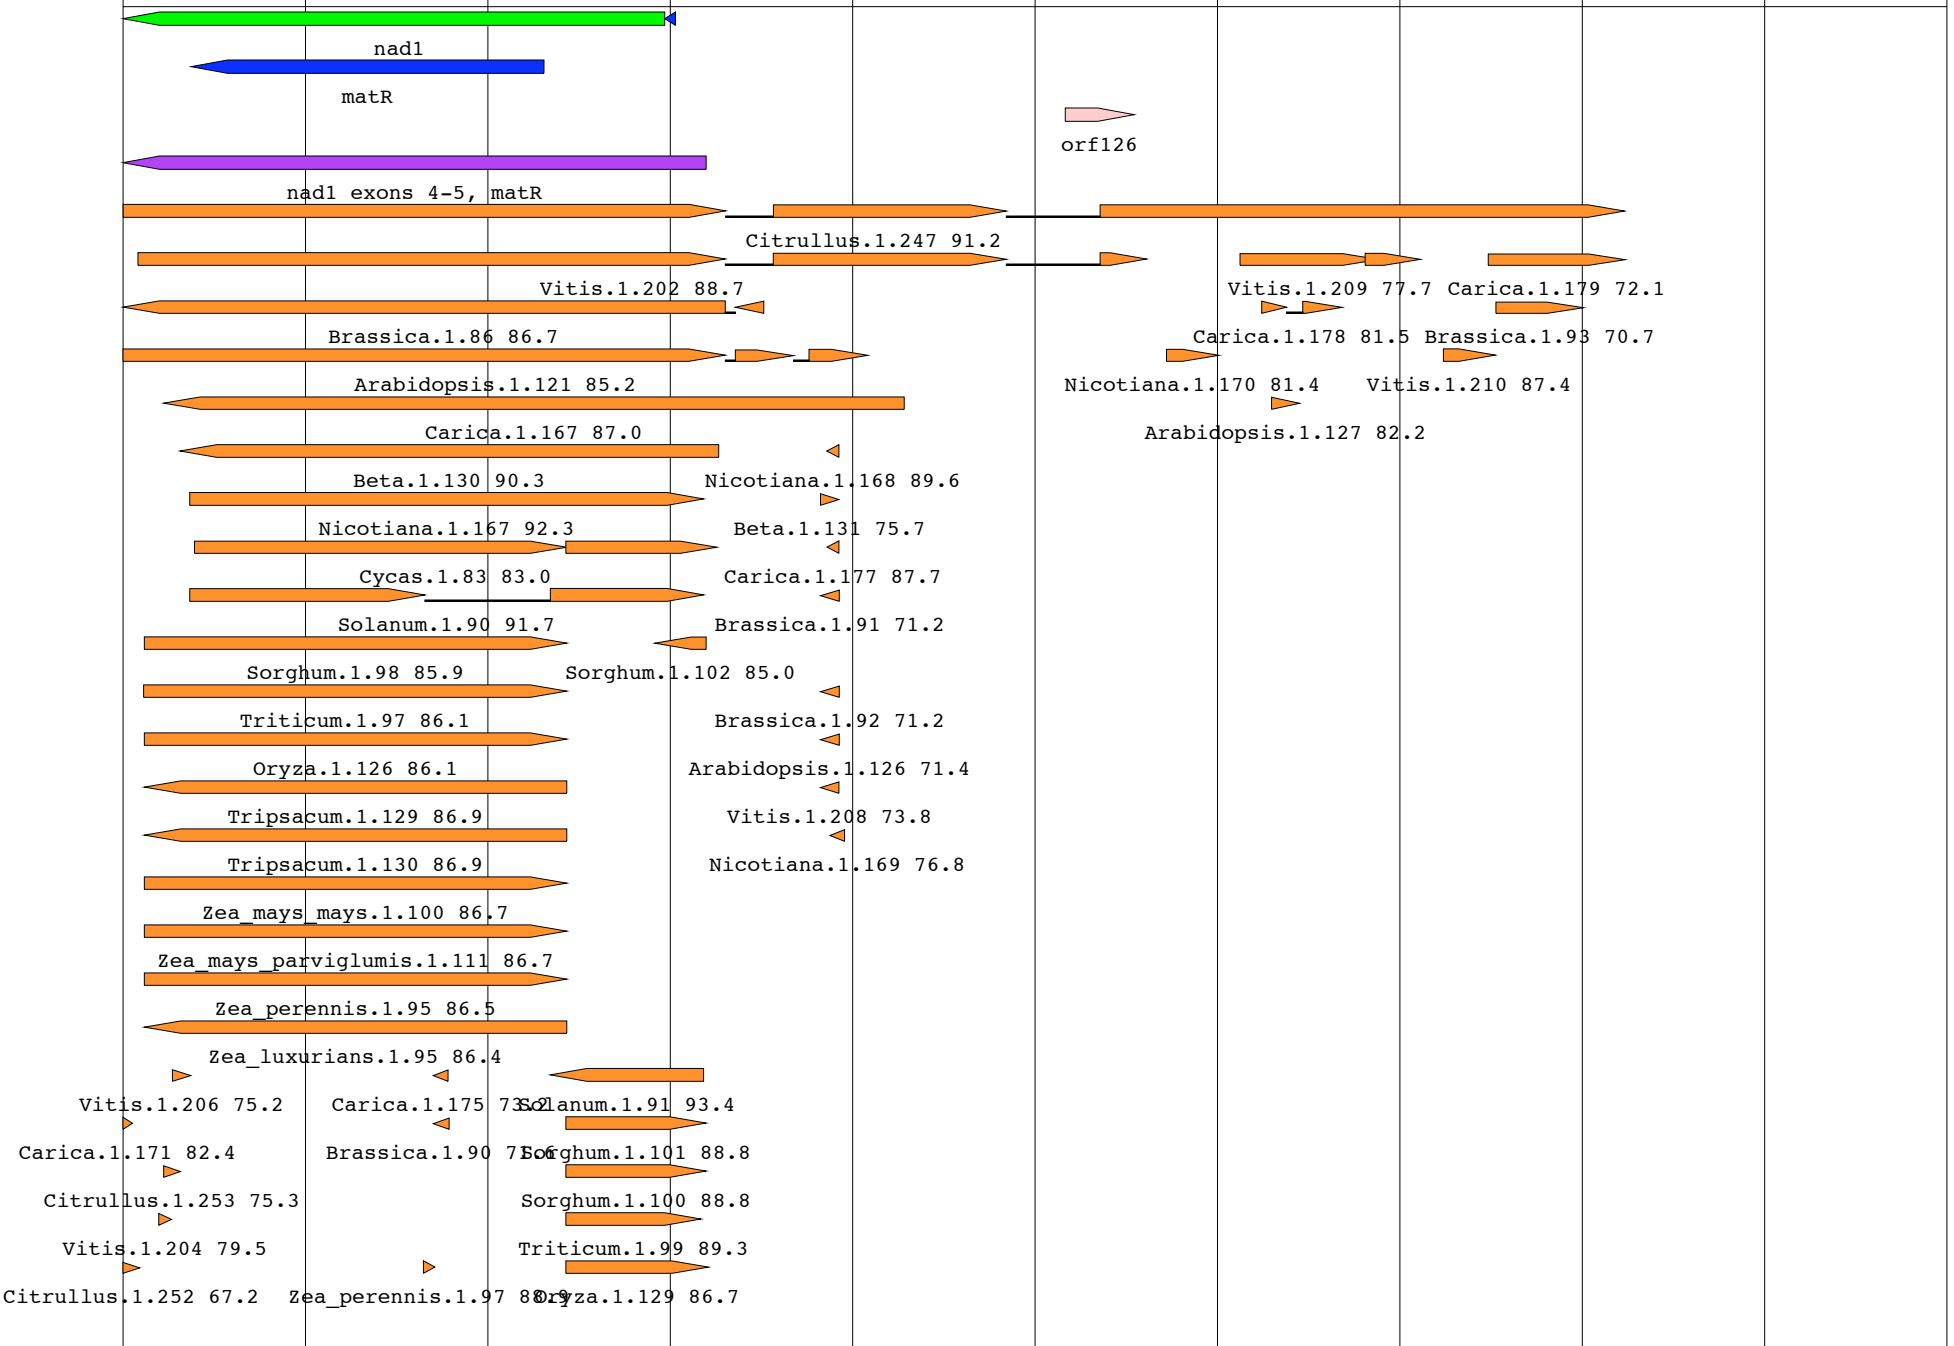



sequence: Cucurbita length: 982833

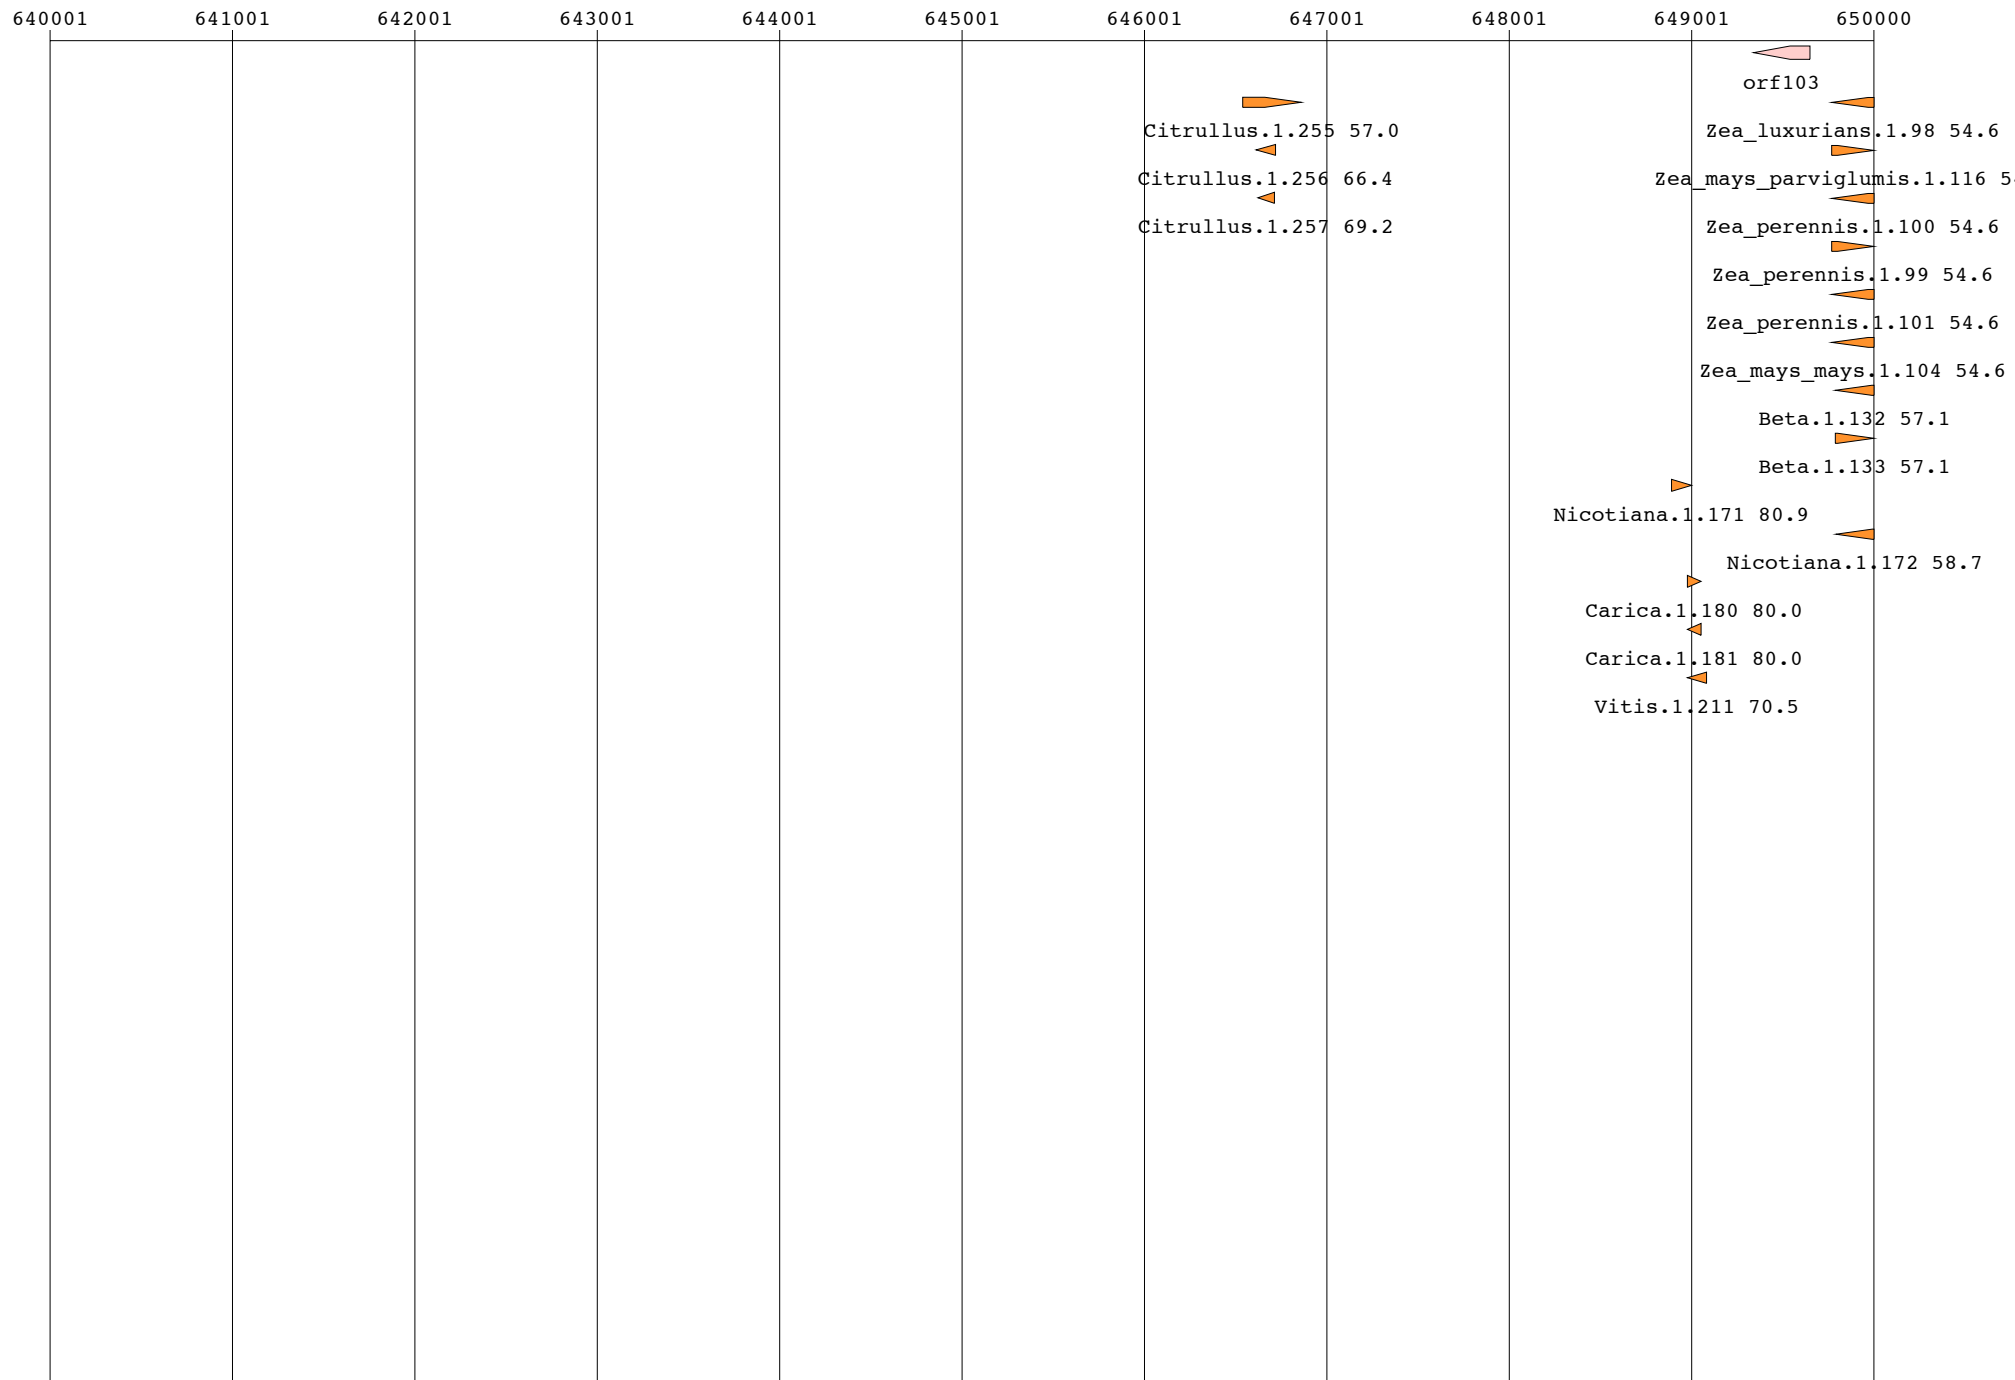

sequence: Cucurbita length: 982833

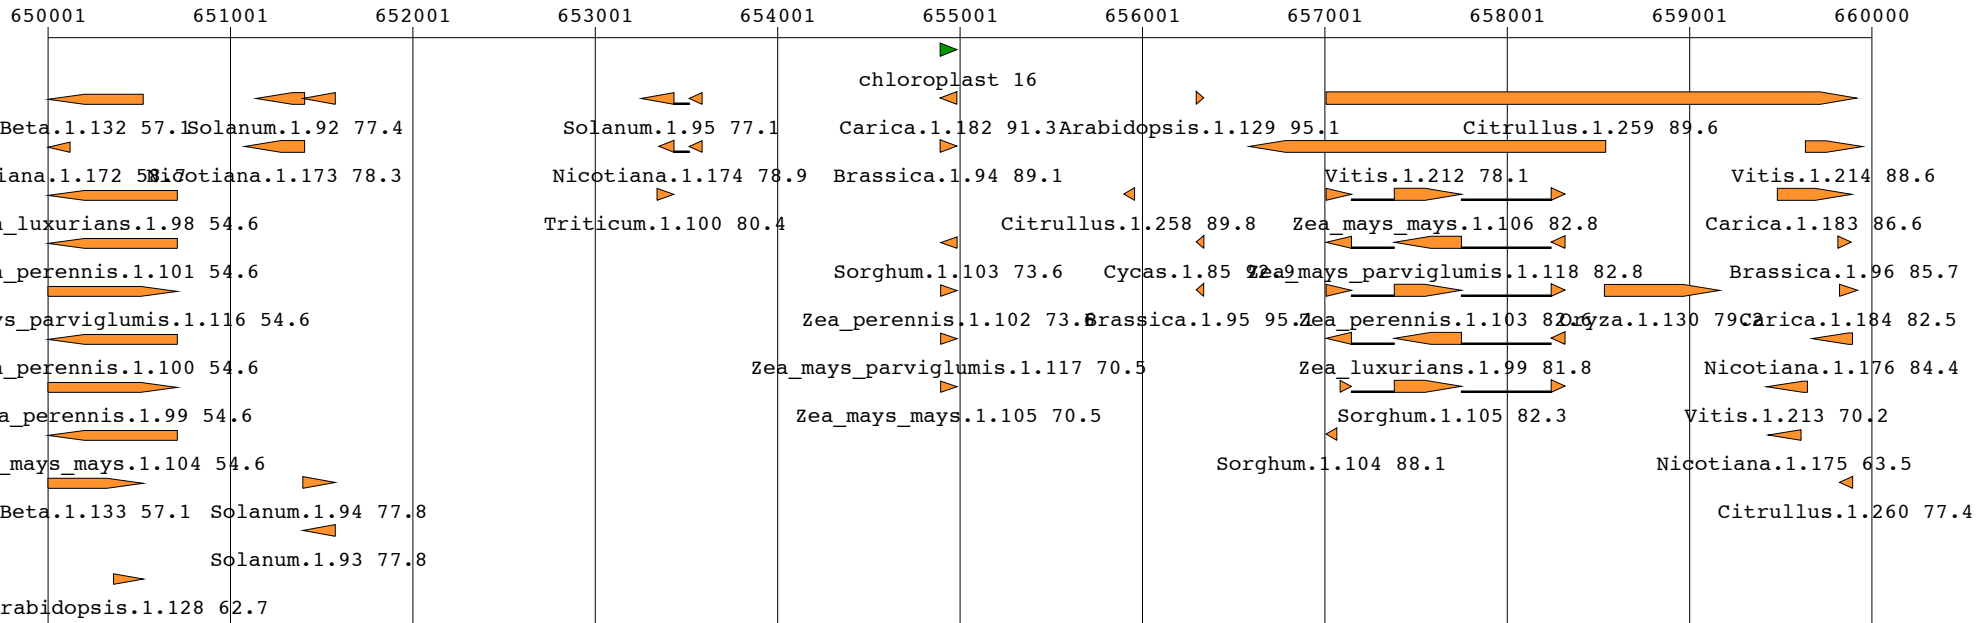

sequence: Cucurbita length: 982833

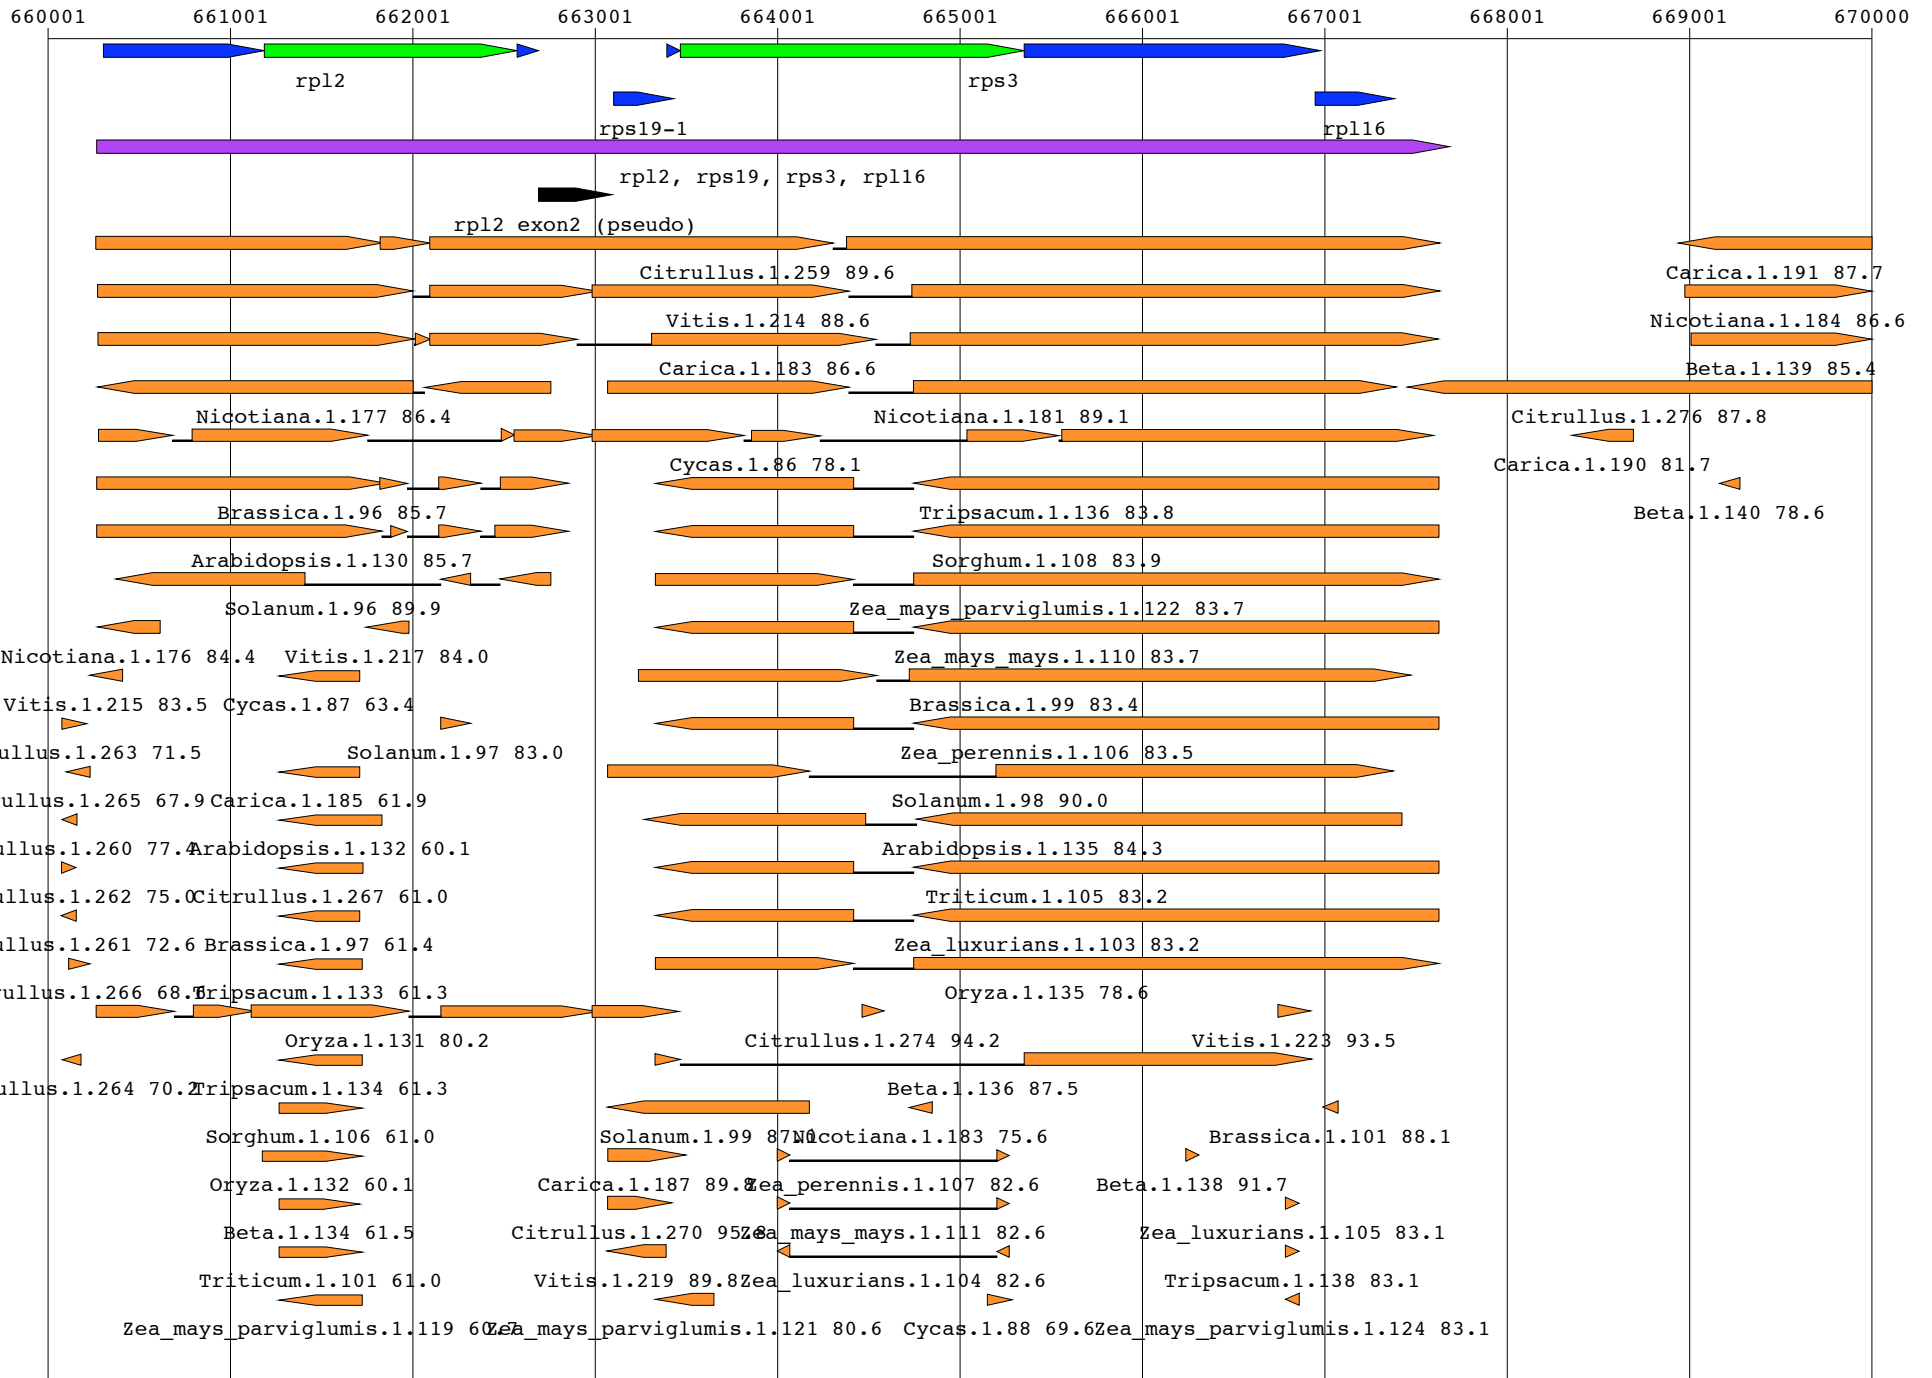

sequence: Cucurbita length: 982833

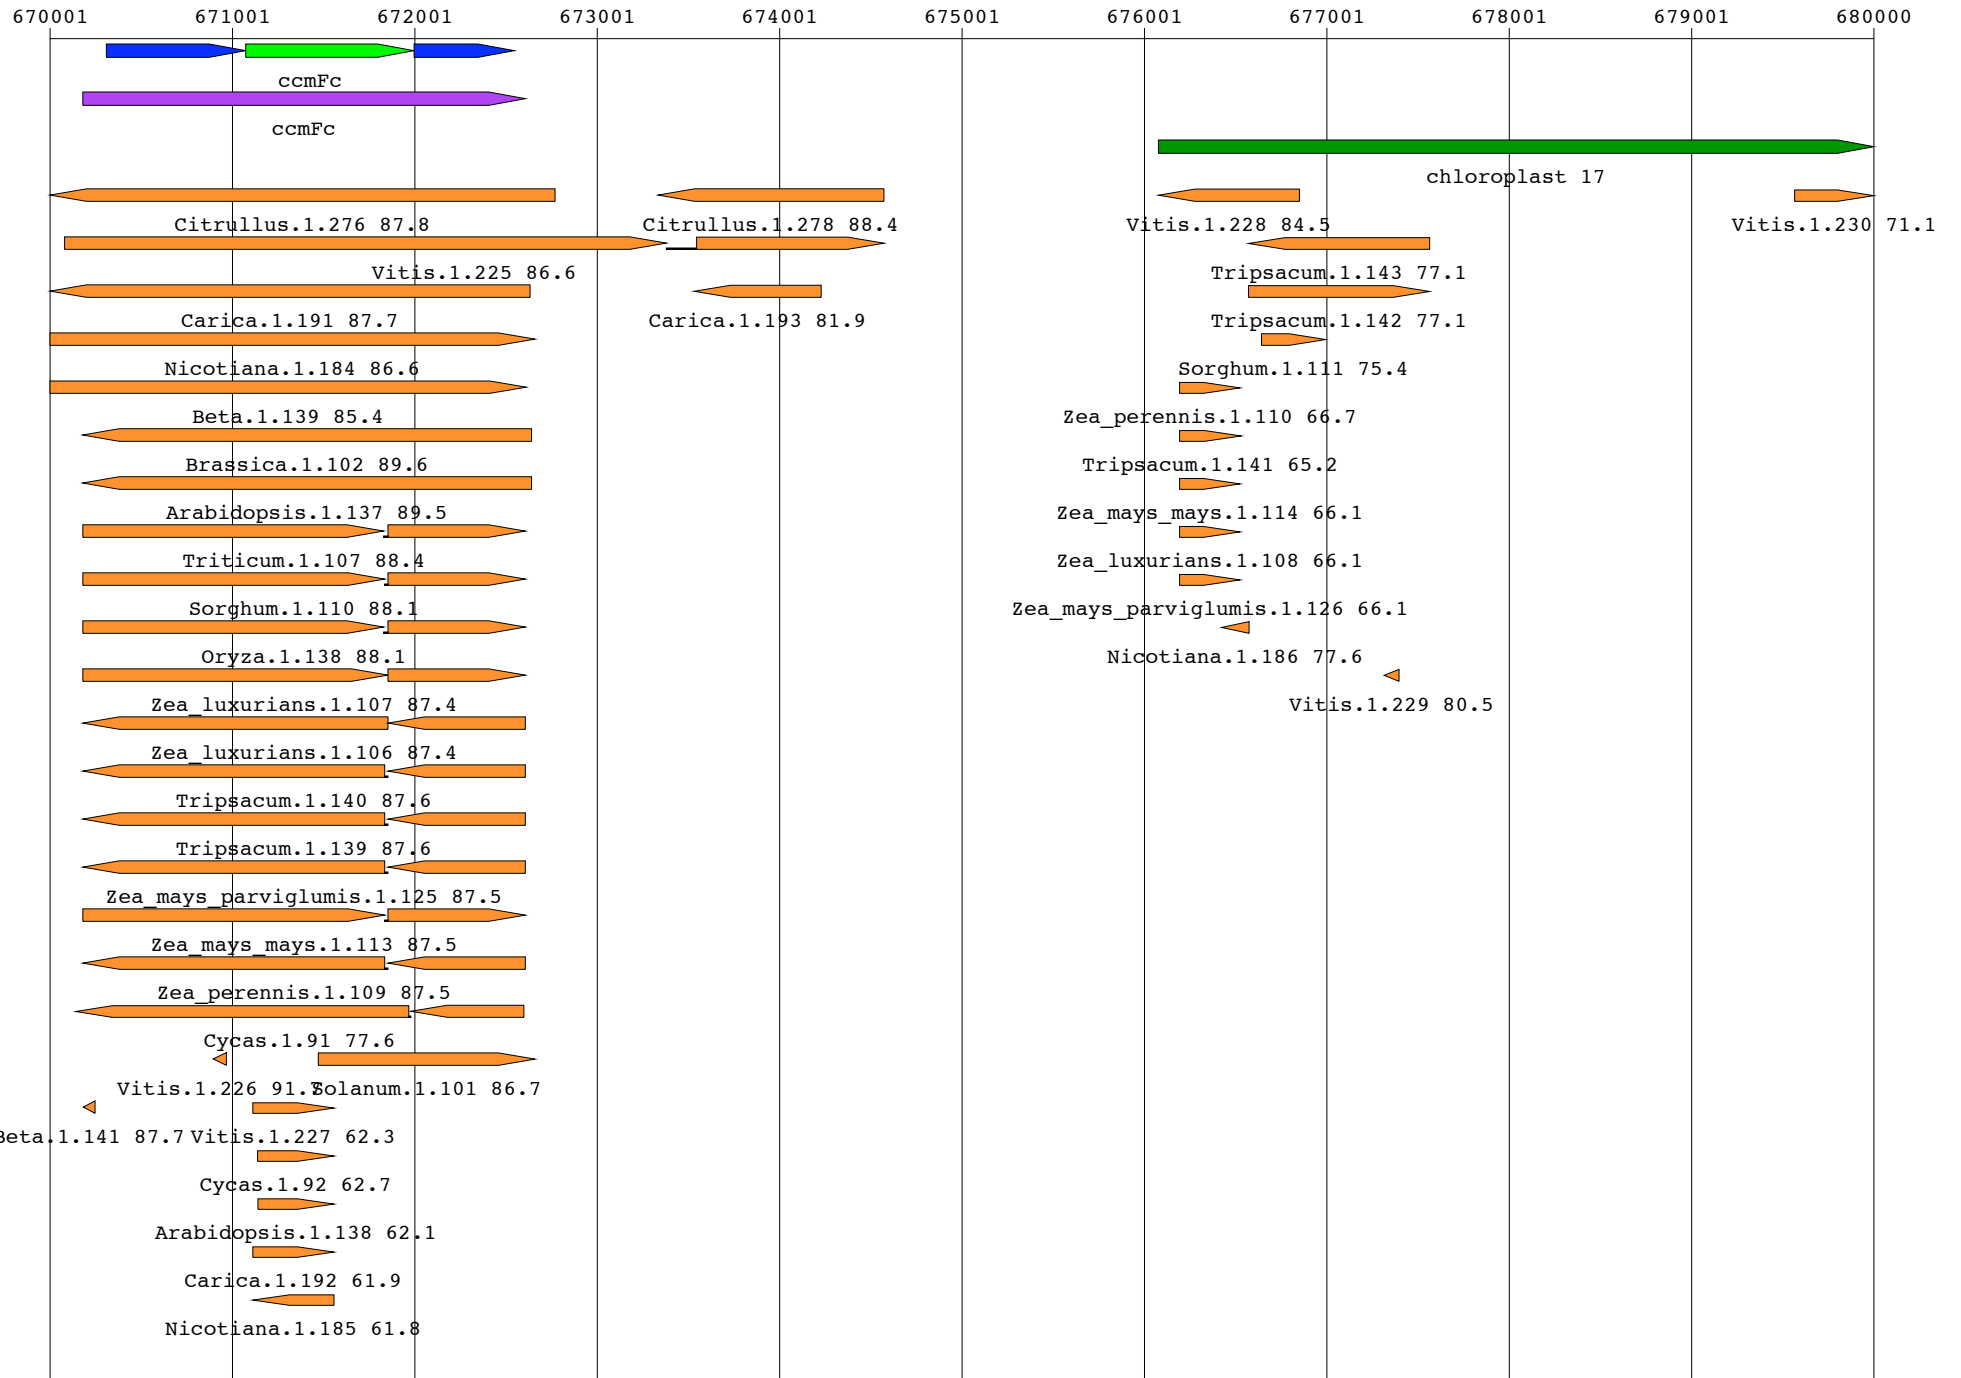

sequence: Cucurbita length: 982833

680001 681001 682001 683001 684001 685001 686001 687001 688001 689001 690000

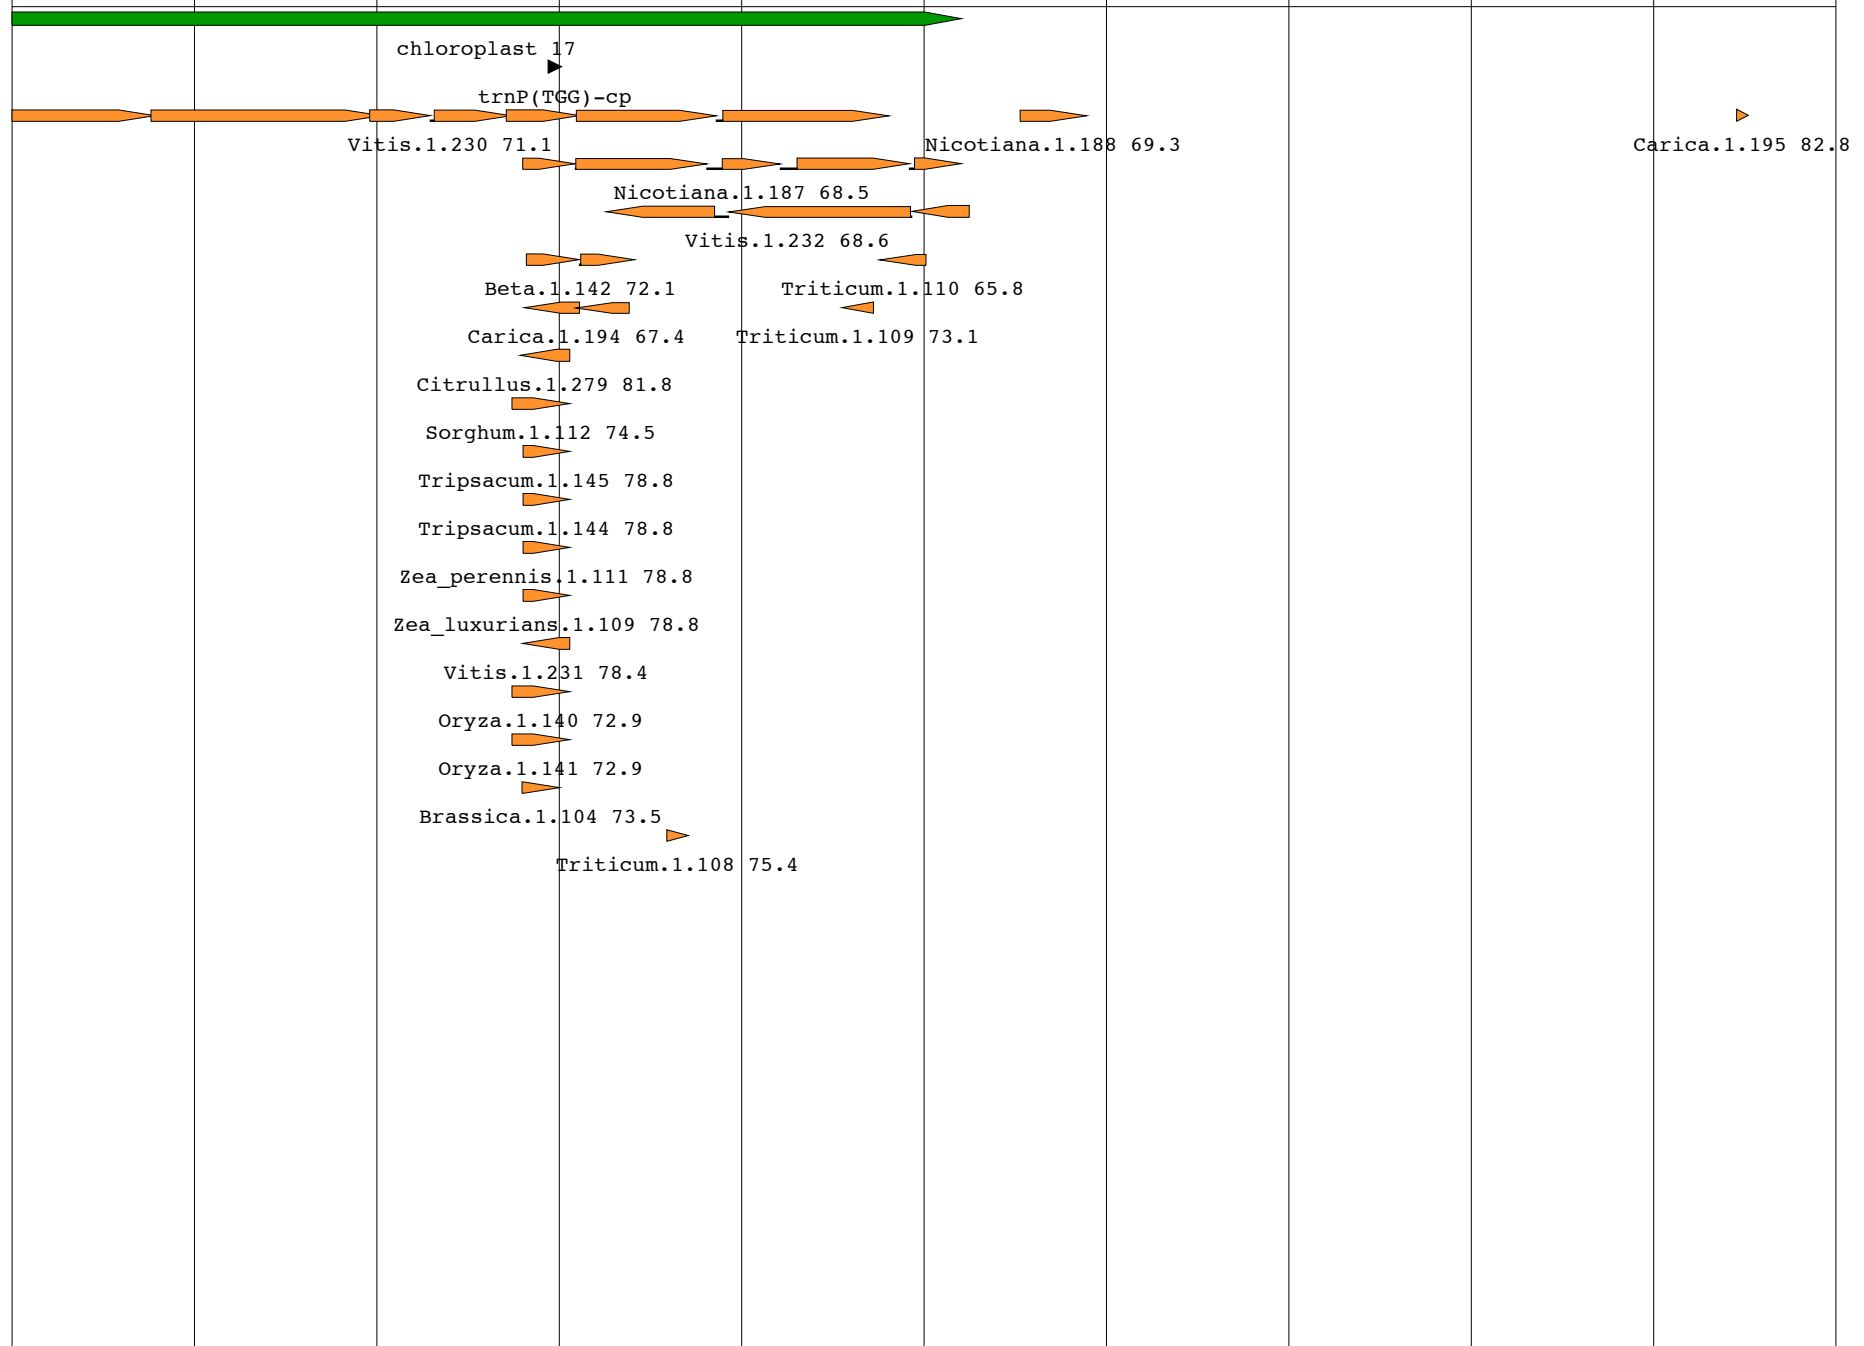

sequence: Cucurbita length: 982833

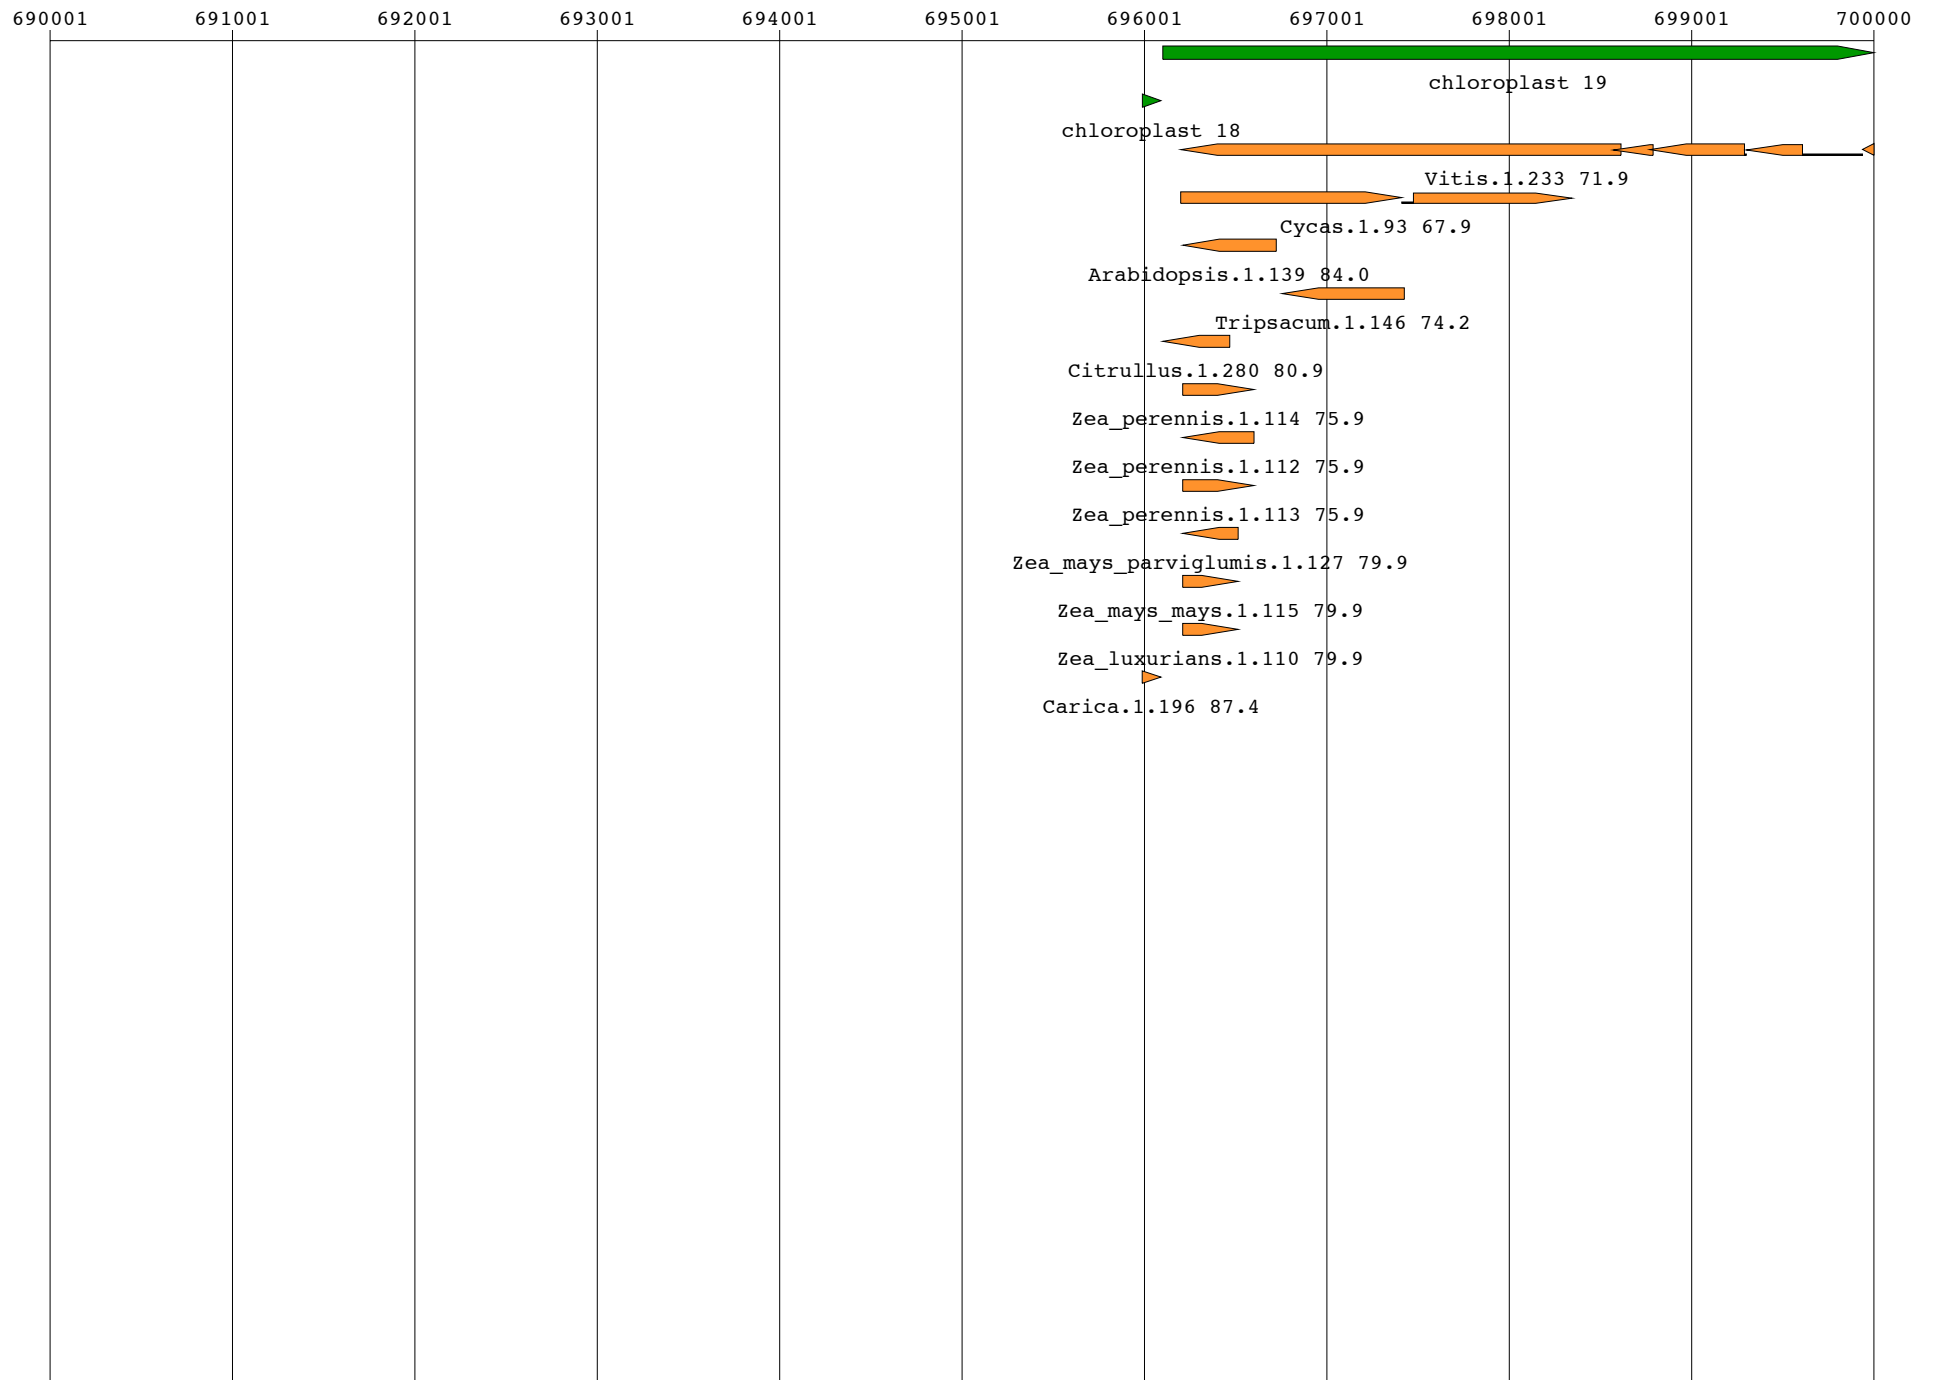

sequence: Cucurbita length: 982833

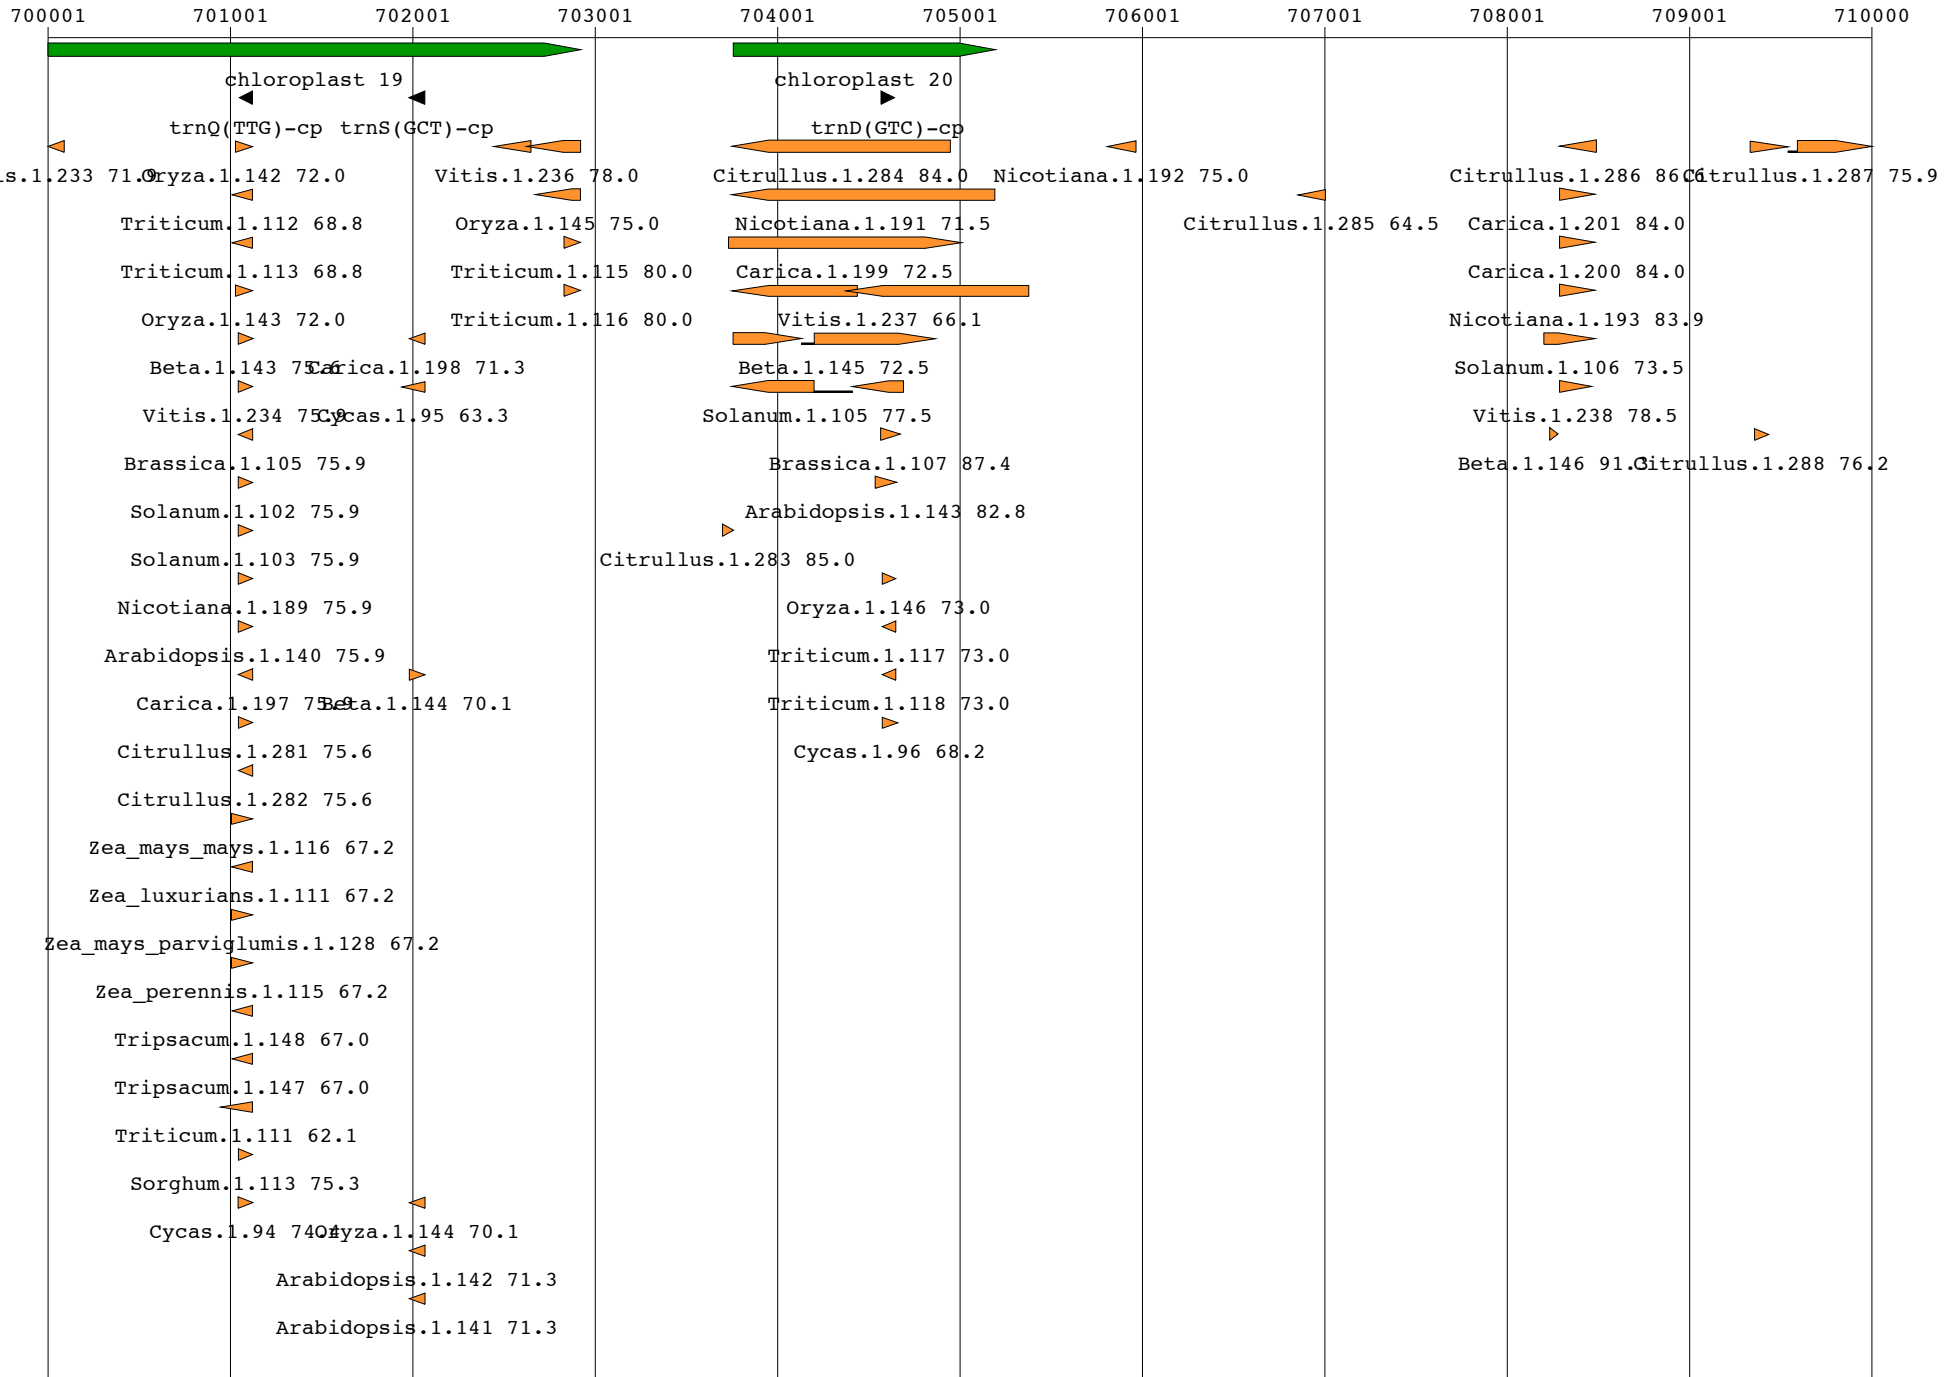

sequence: Cucurbita length: 982833

710001 711001 712001 713001 714001 715001 716001 717001 718001 719001 720000

Citrullus.1.287 75.9

Beta.1.148 93.4

Citrullus.1.289 89.9

Beta.1.147 71.1

Carica.1.202 71.8

Arabidopsis.1.144 86.7

Brassica.1.108 81.3

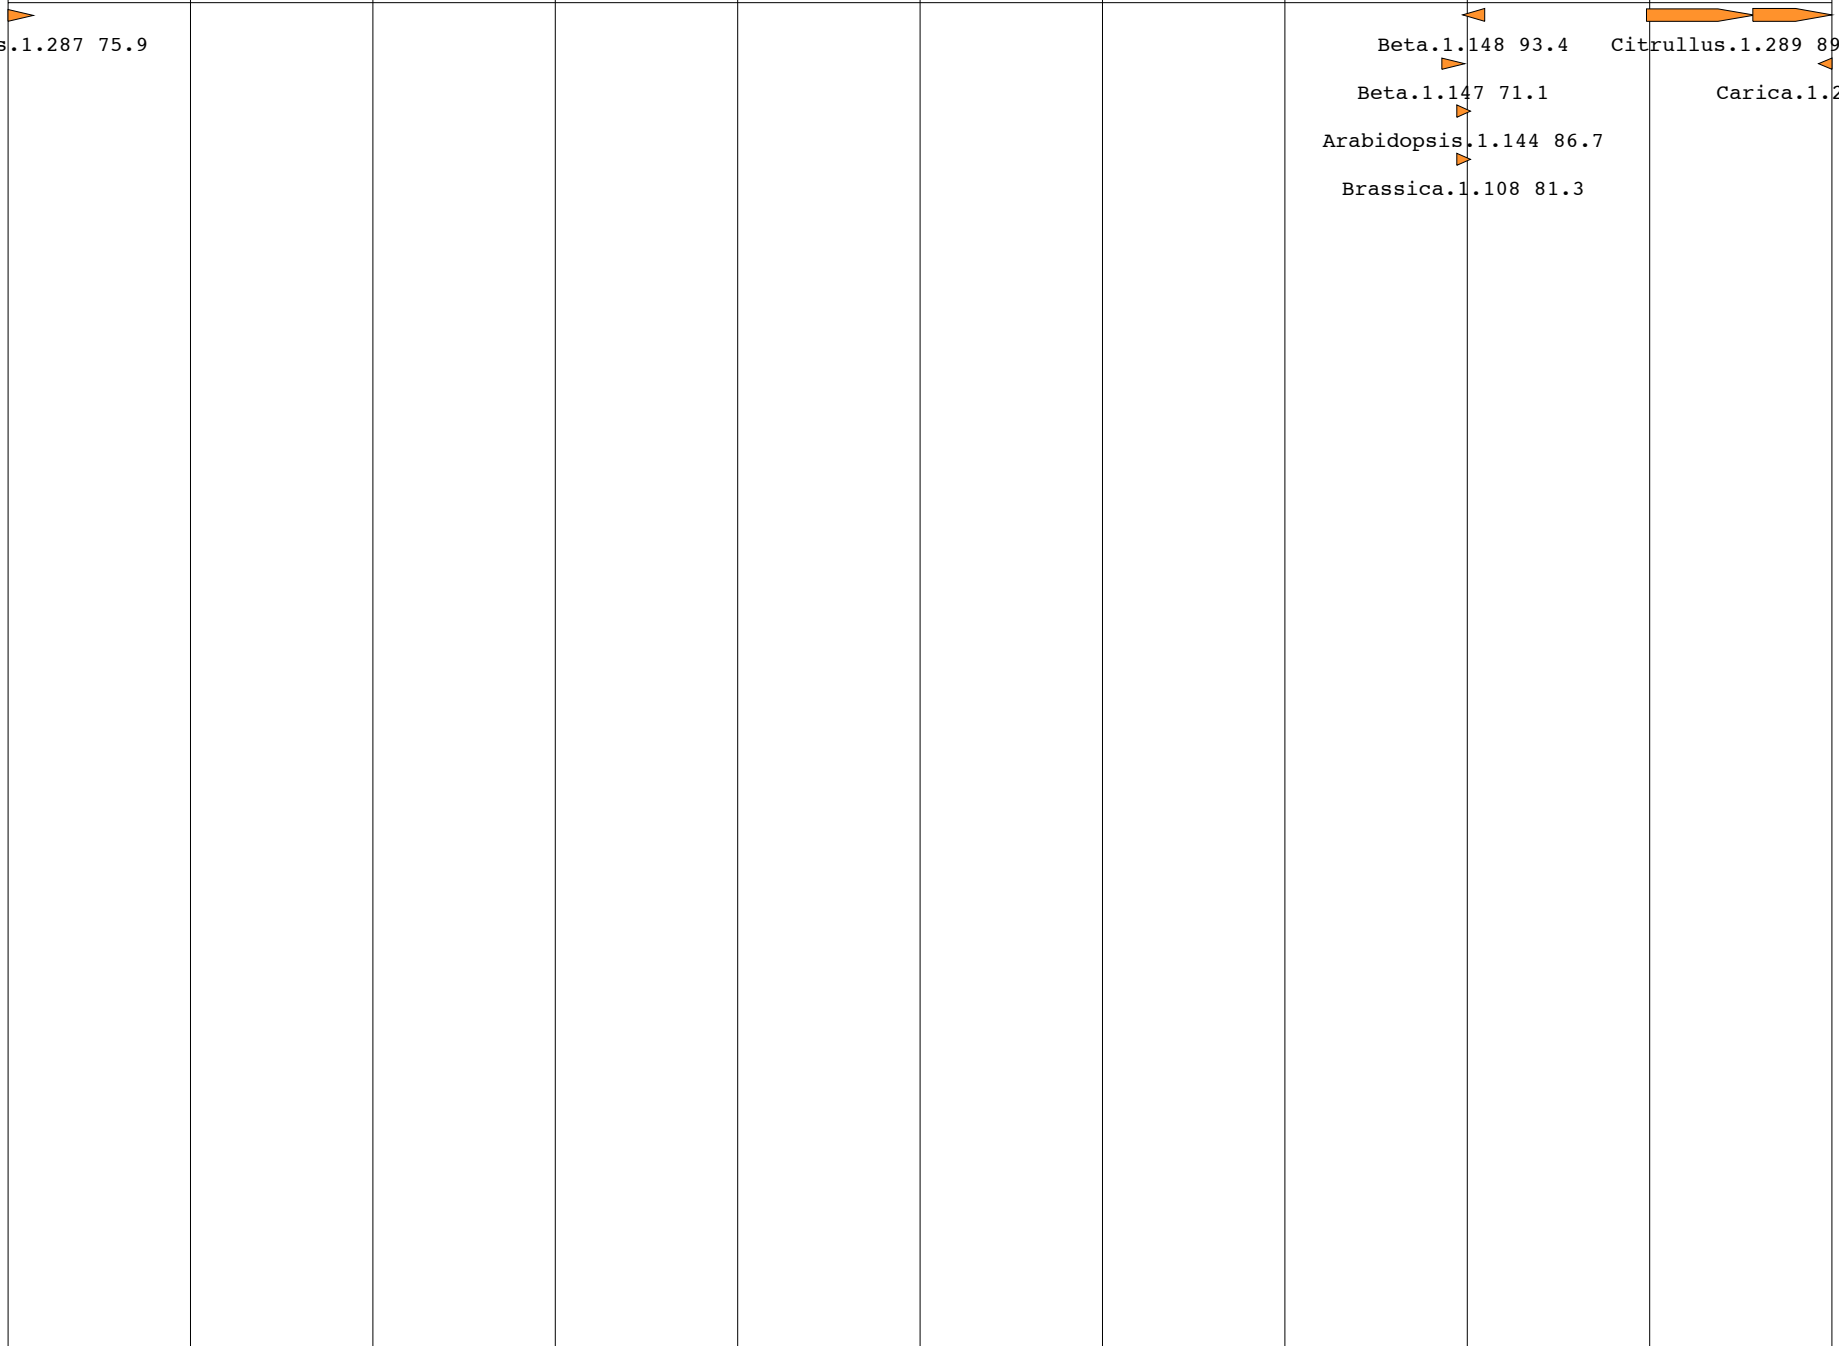



sequence: Cucurbita length: 982833

720001 721001 722001 723001 724001 725001 726001 727001 728001 729001 730000

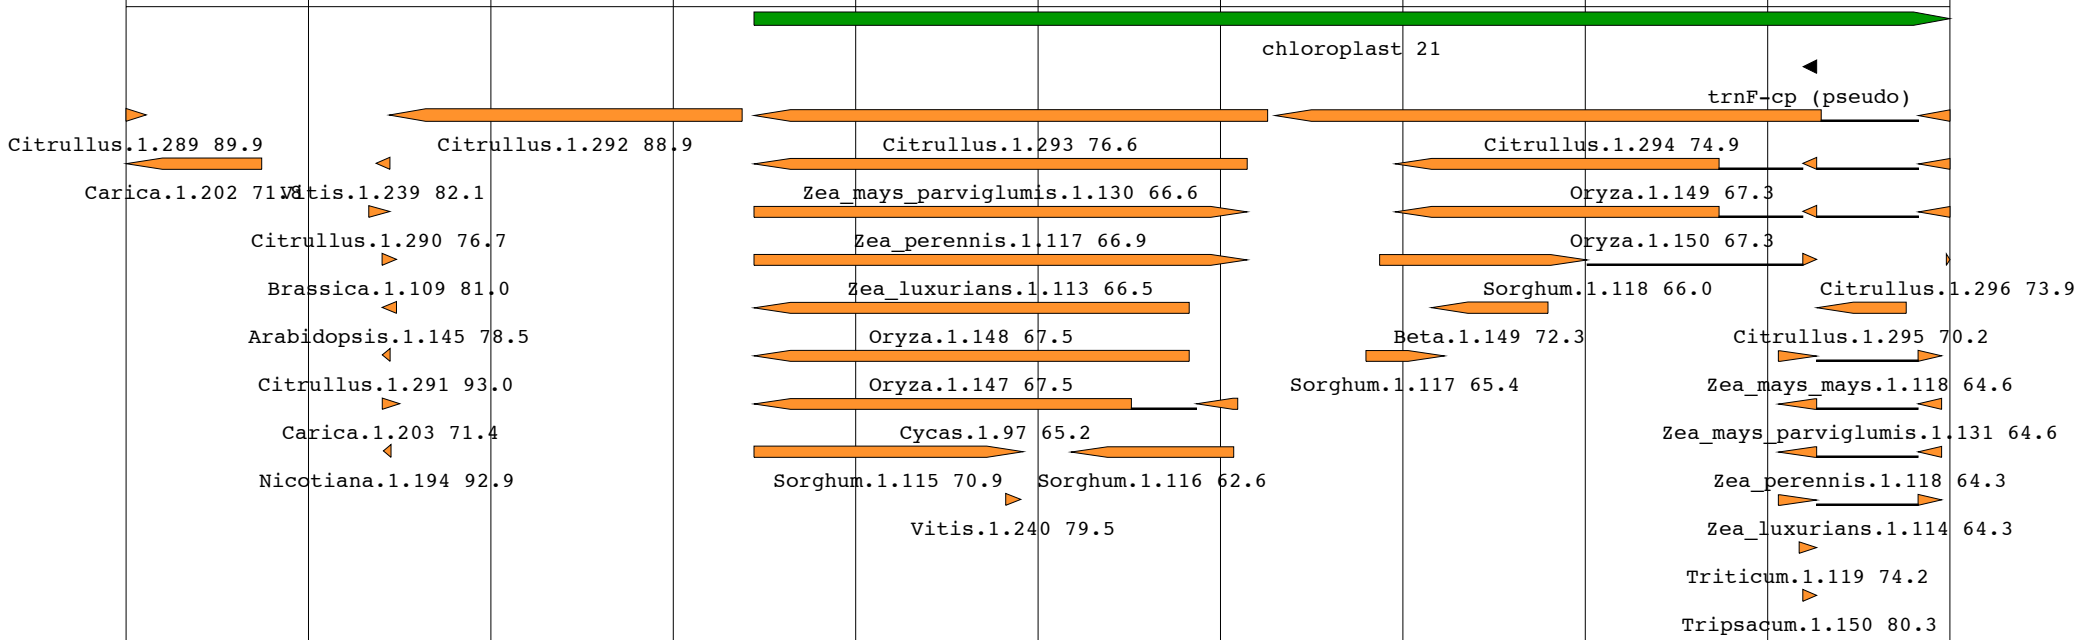

sequence: Cucurbita length: 982833

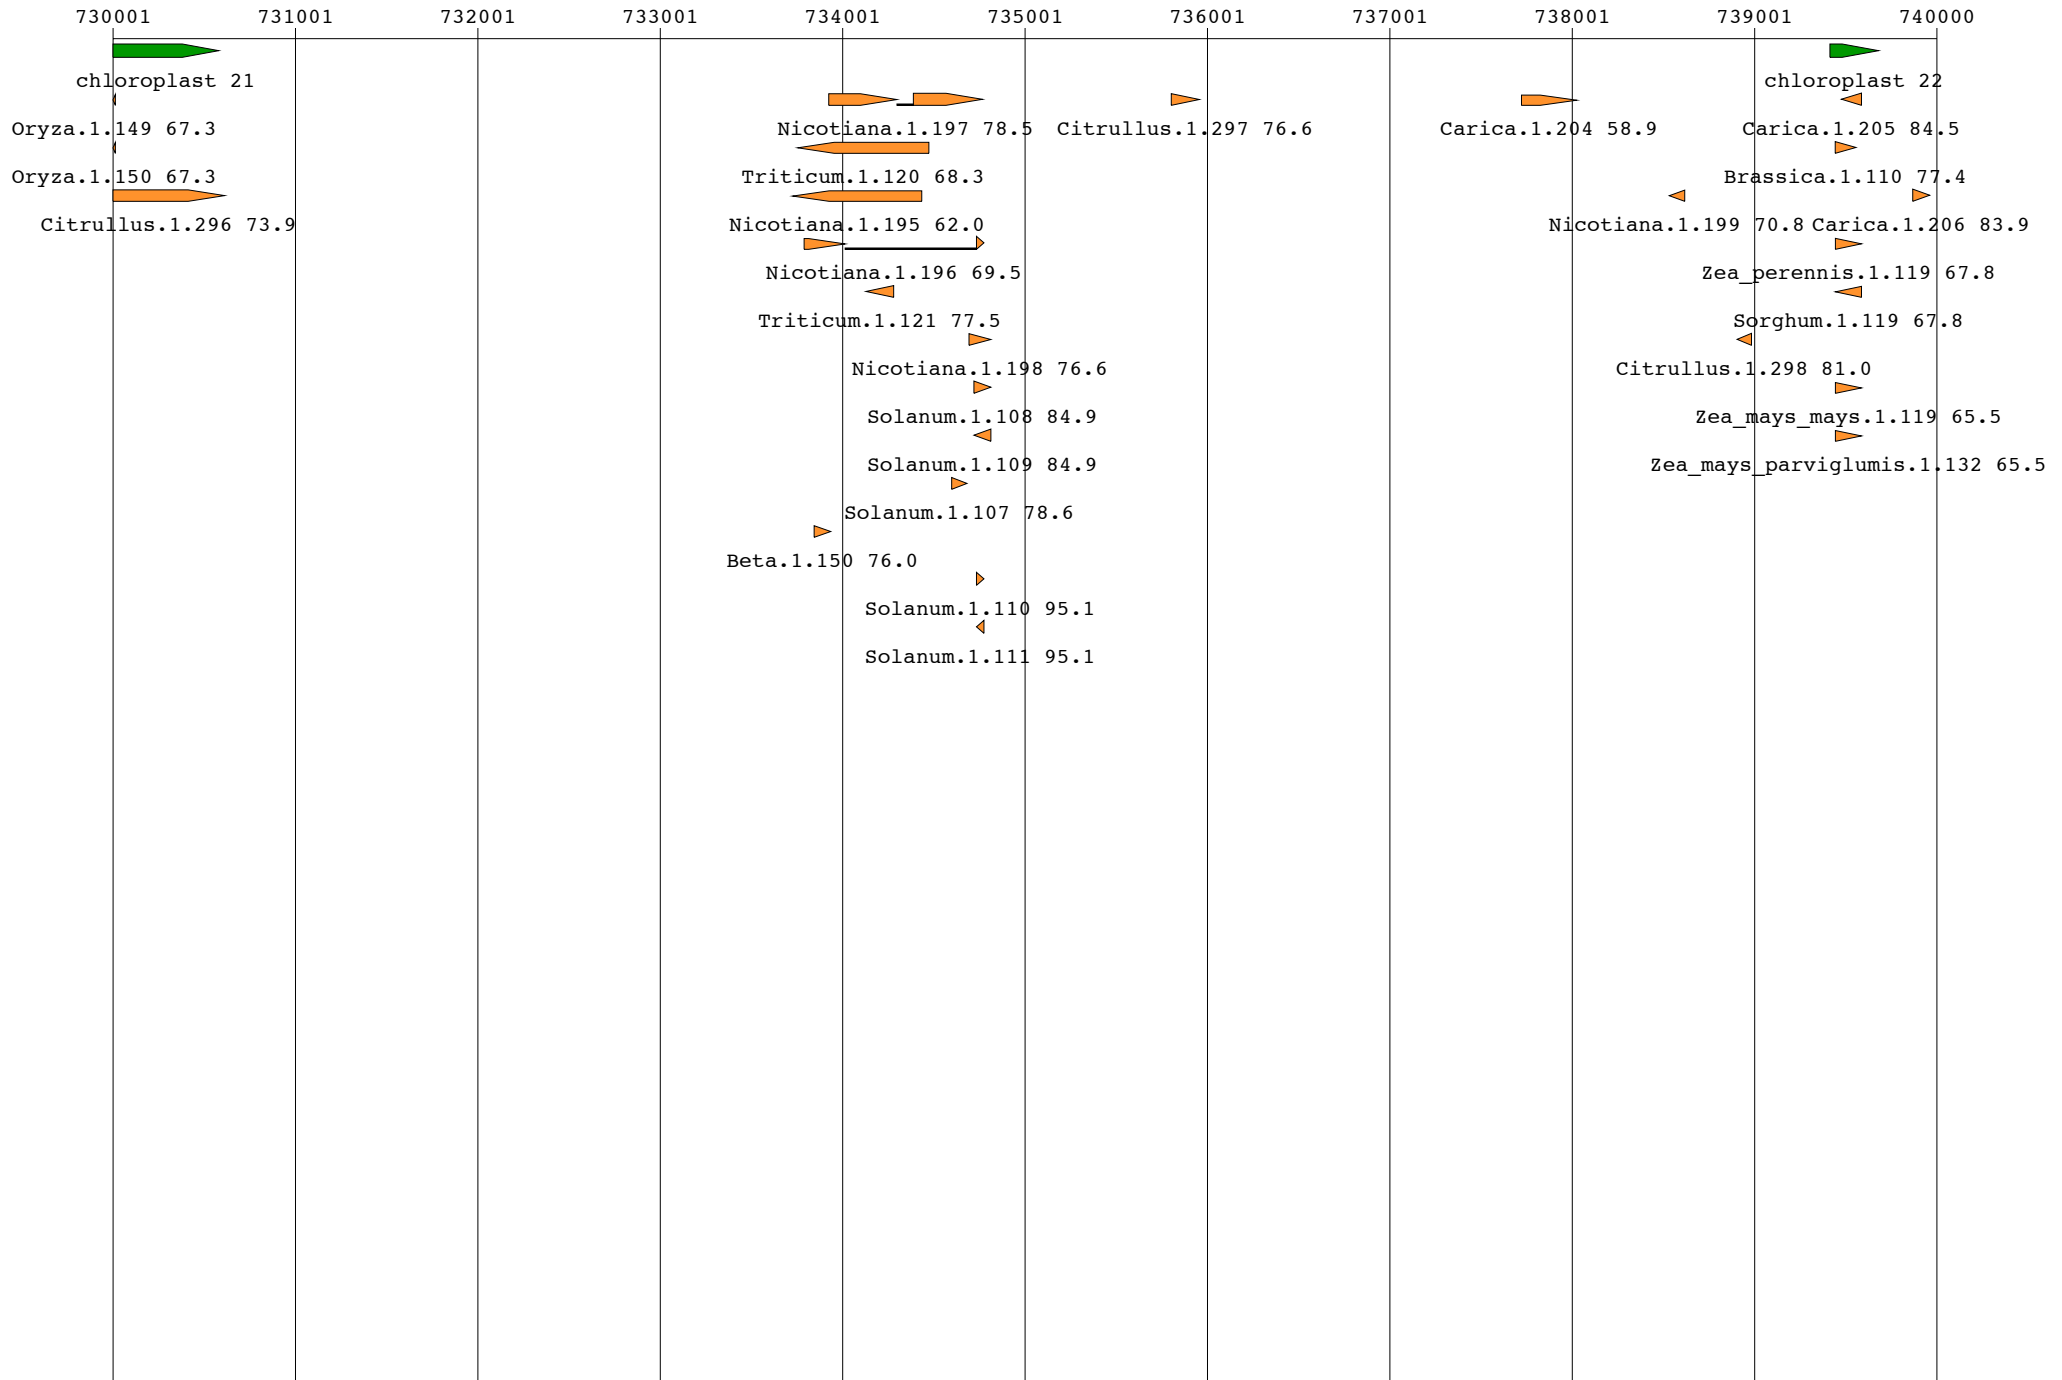

sequence: Cucurbita length: 982833

740001 741001 742001 743001 744001 745001 746001 747001 748001 749001 750000

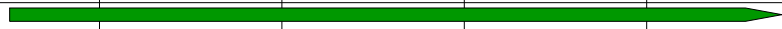

chloroplast 23

trnY(GTA)-cp (pseudo)

trnD(GTC)-cp

trnE-cp (pseudo)

Vitis.1.241 67.4

Citrullus.1.299 67.6

Vitis.1.242 70.8

Nicotiana.1.200 82.4

Beta.1.151 78.8

Solanum.1.112 87.9

Carica.1.207 82.2

Brassica.1.111 85.7

Arabidopsis.1.146 97.4

Cycas.1.98 70.1

Zea\_mays\_parviglumis.1.133 69.7

Zea\_mays\_mays.1.120 69.7

Tripsacum.1.152 69.3

Tripsacum.1.151 69.3

sequence: Cucurbita length: 982833

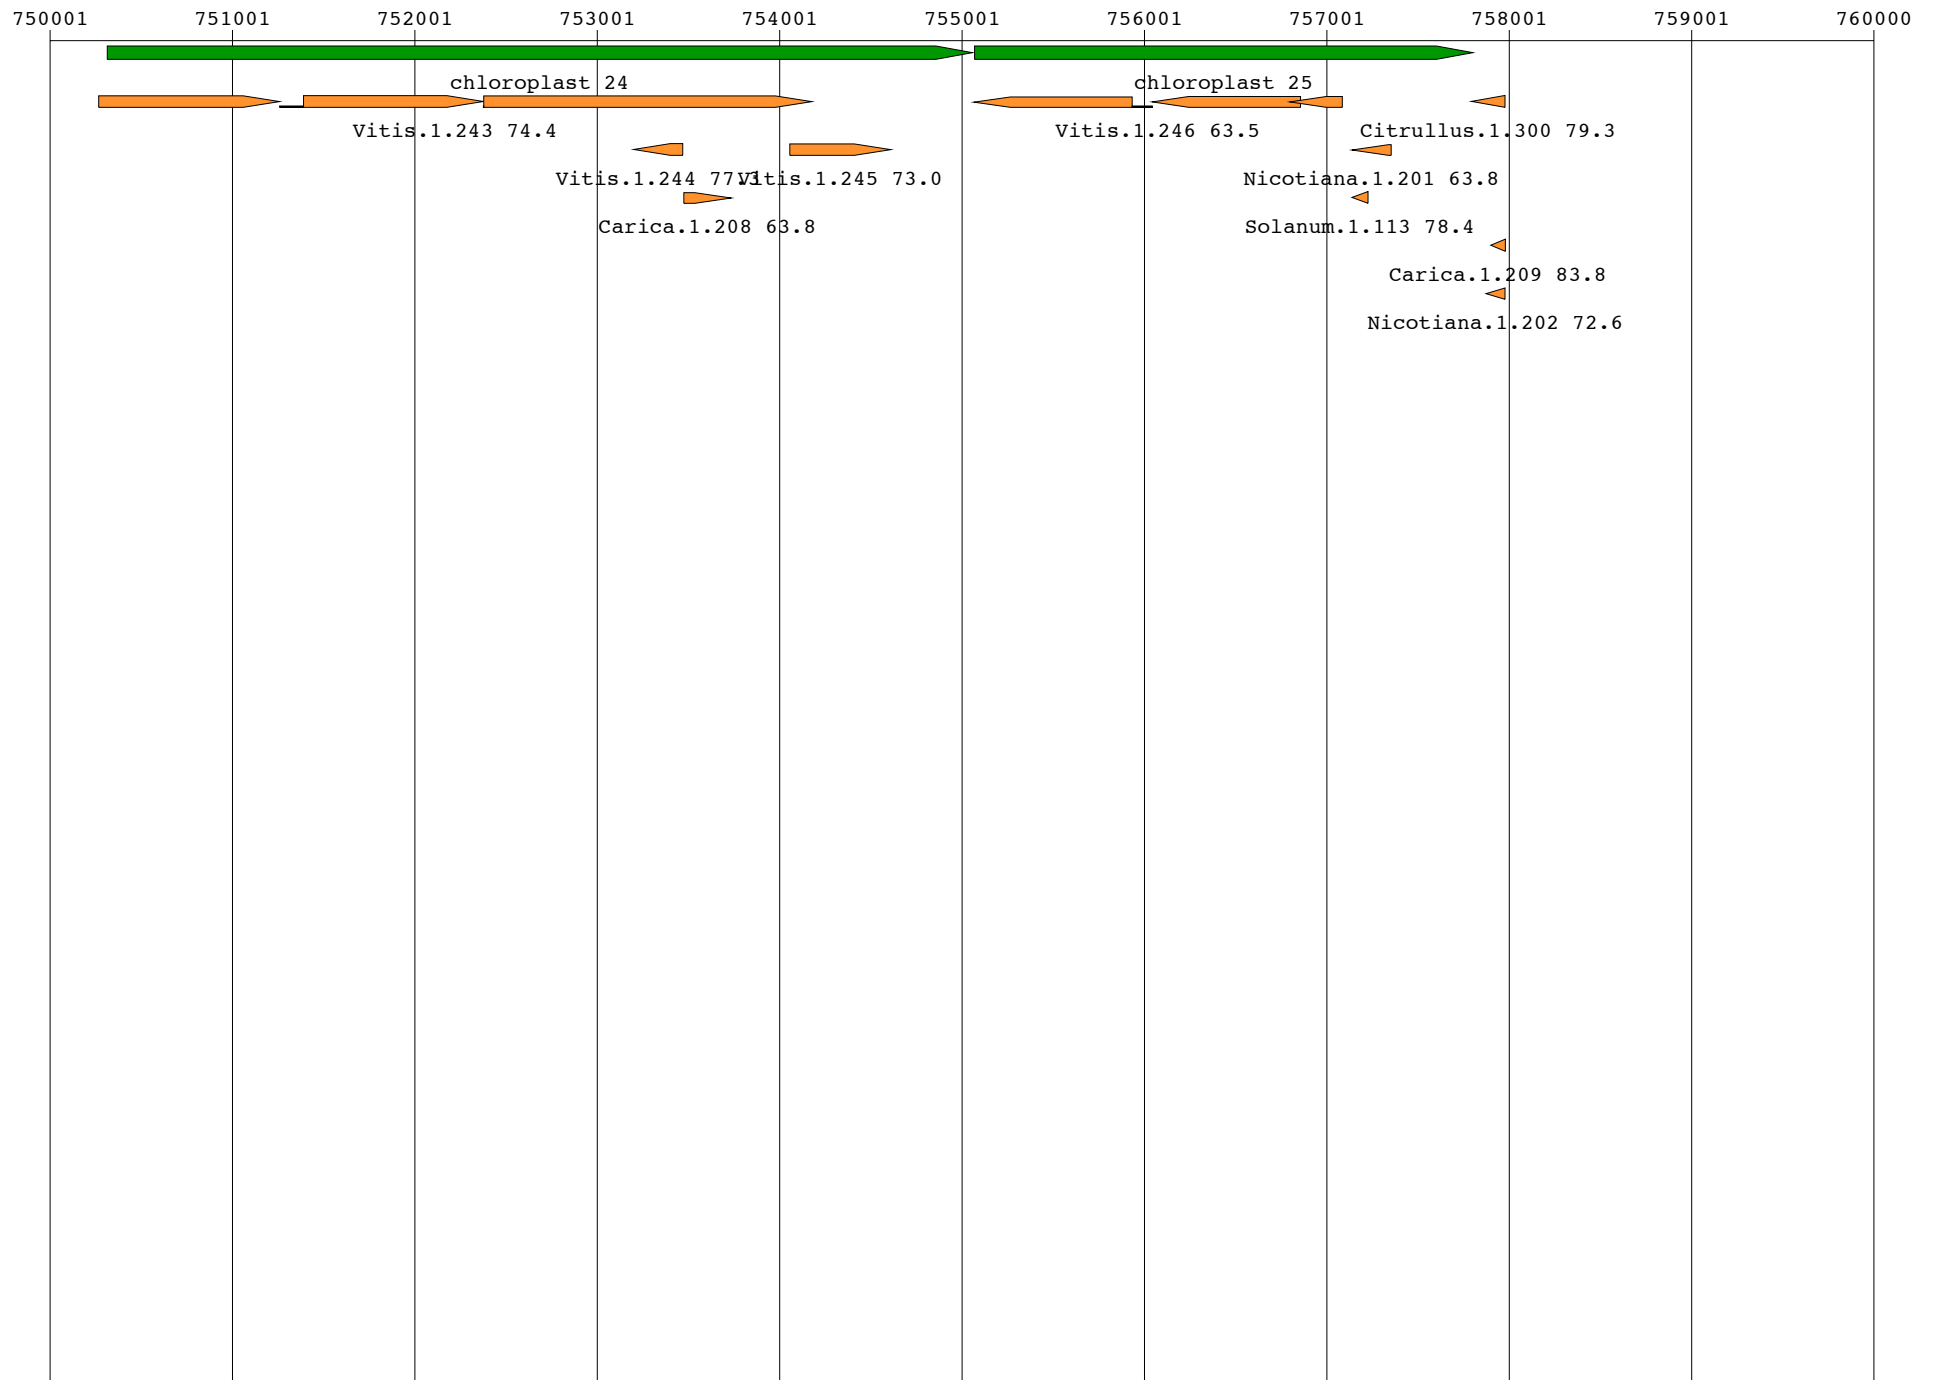

sequence: Cucurbita length: 982833

760001 761001 762001 763001 764001 765001 766001 767001 768001 769001 770000

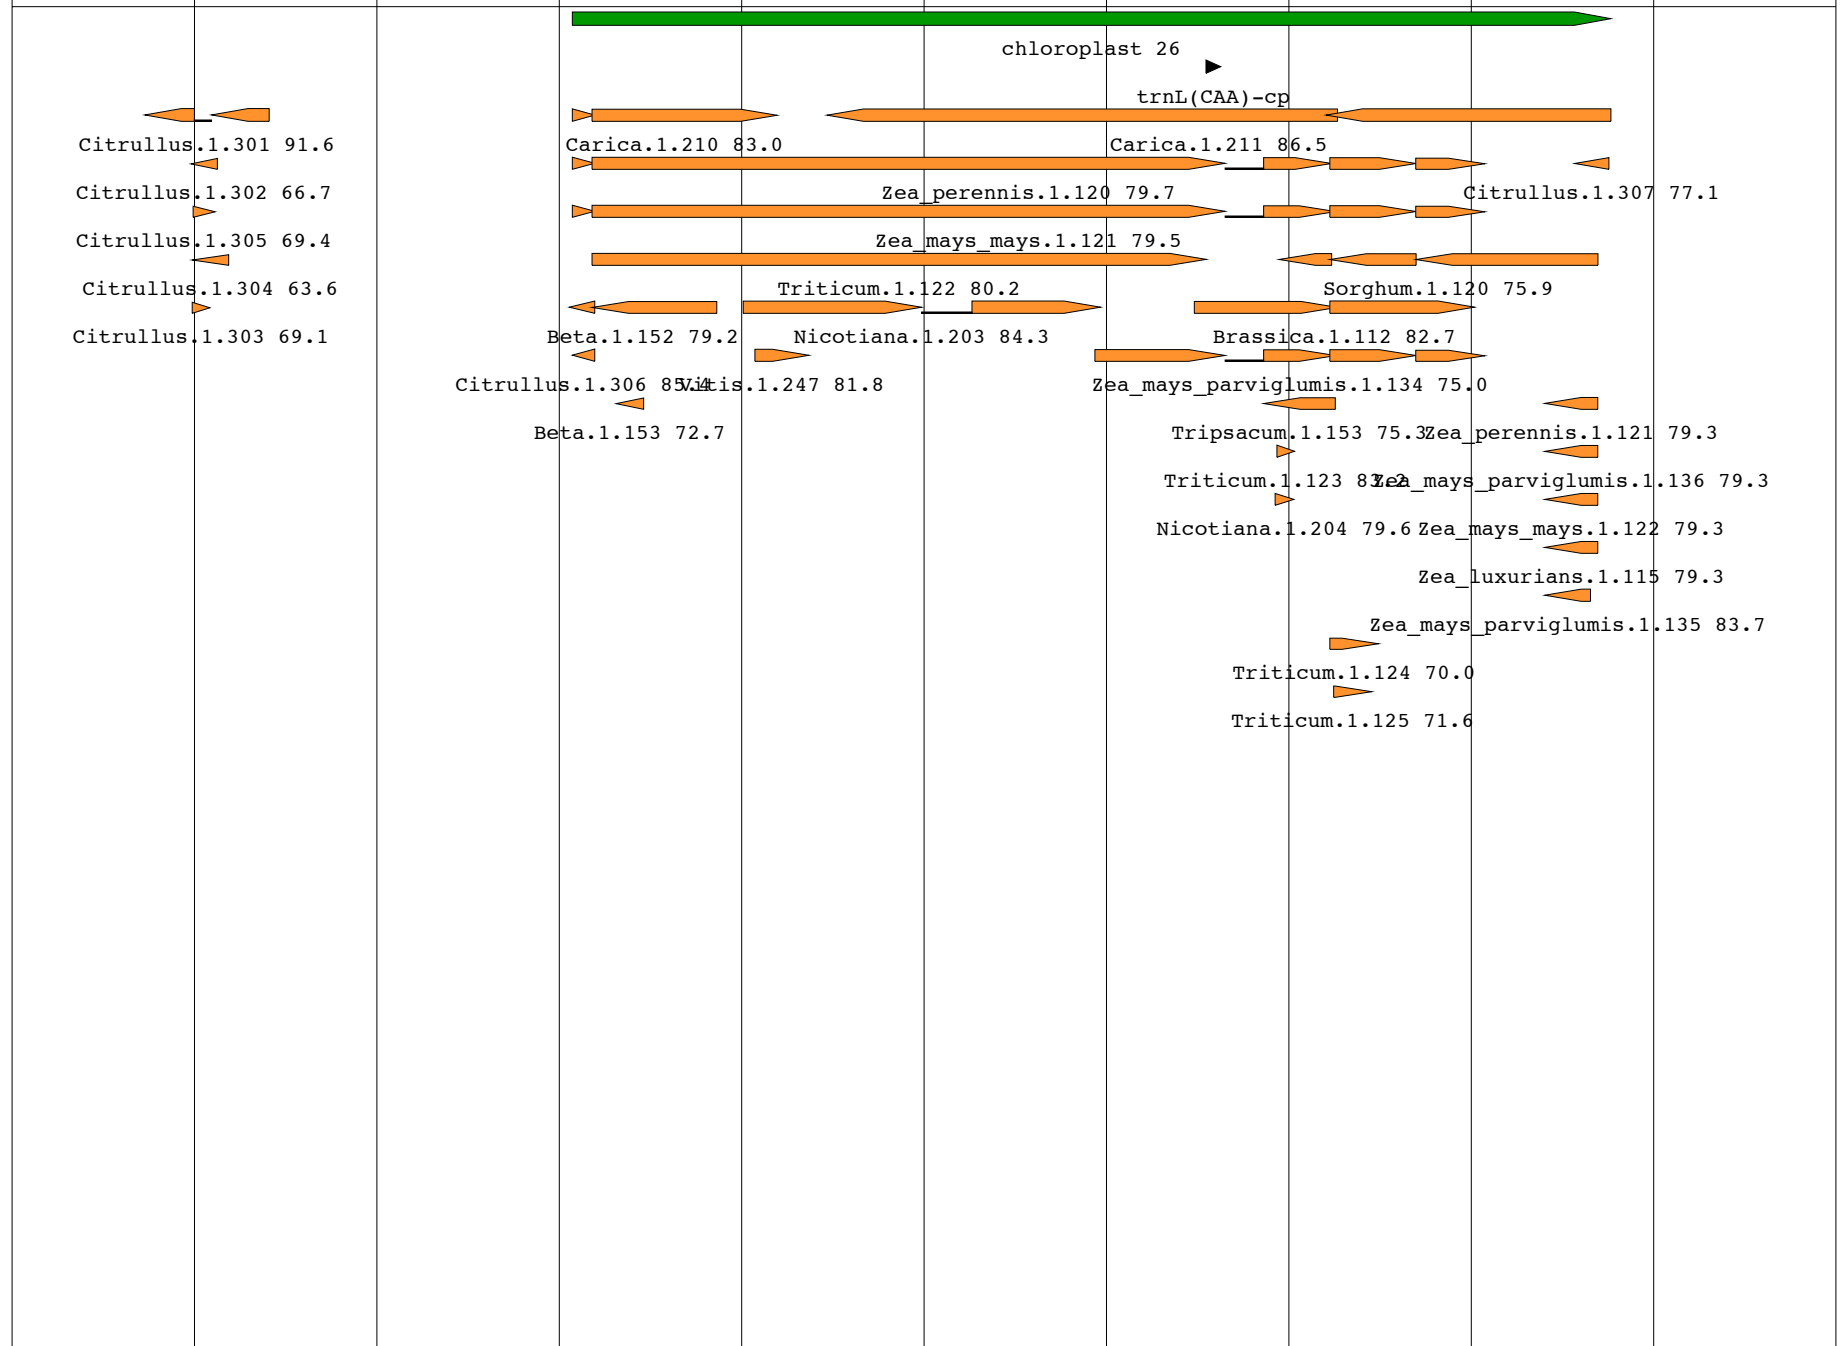

sequence: Cucurbita length: 982833

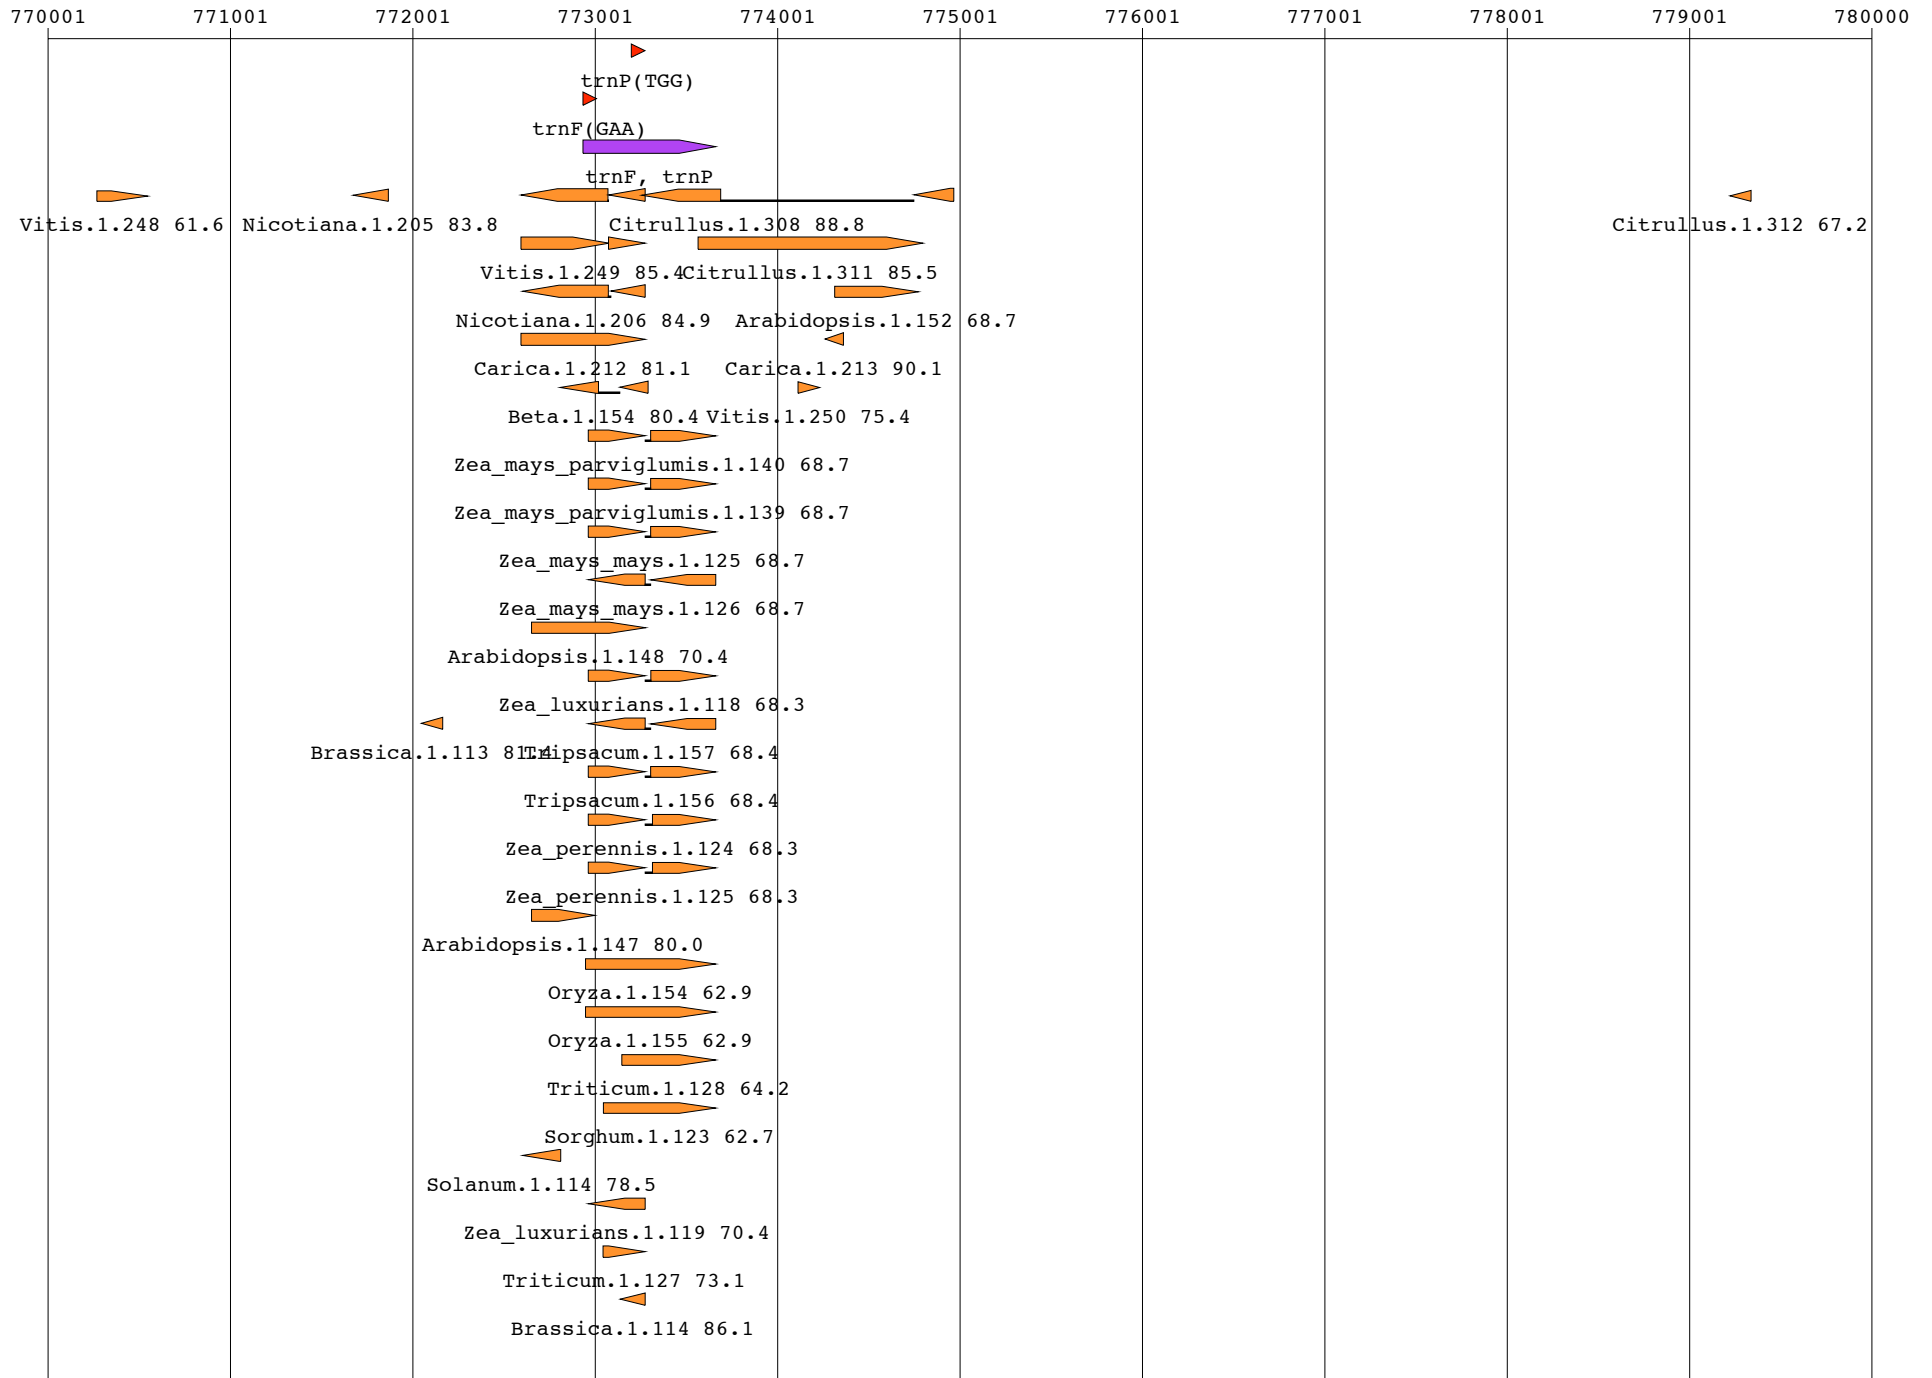

sequence: Cucurbita length: 982833

780001 781001 782001 783001 784001 785001 786001 787001 788001 789001 790000

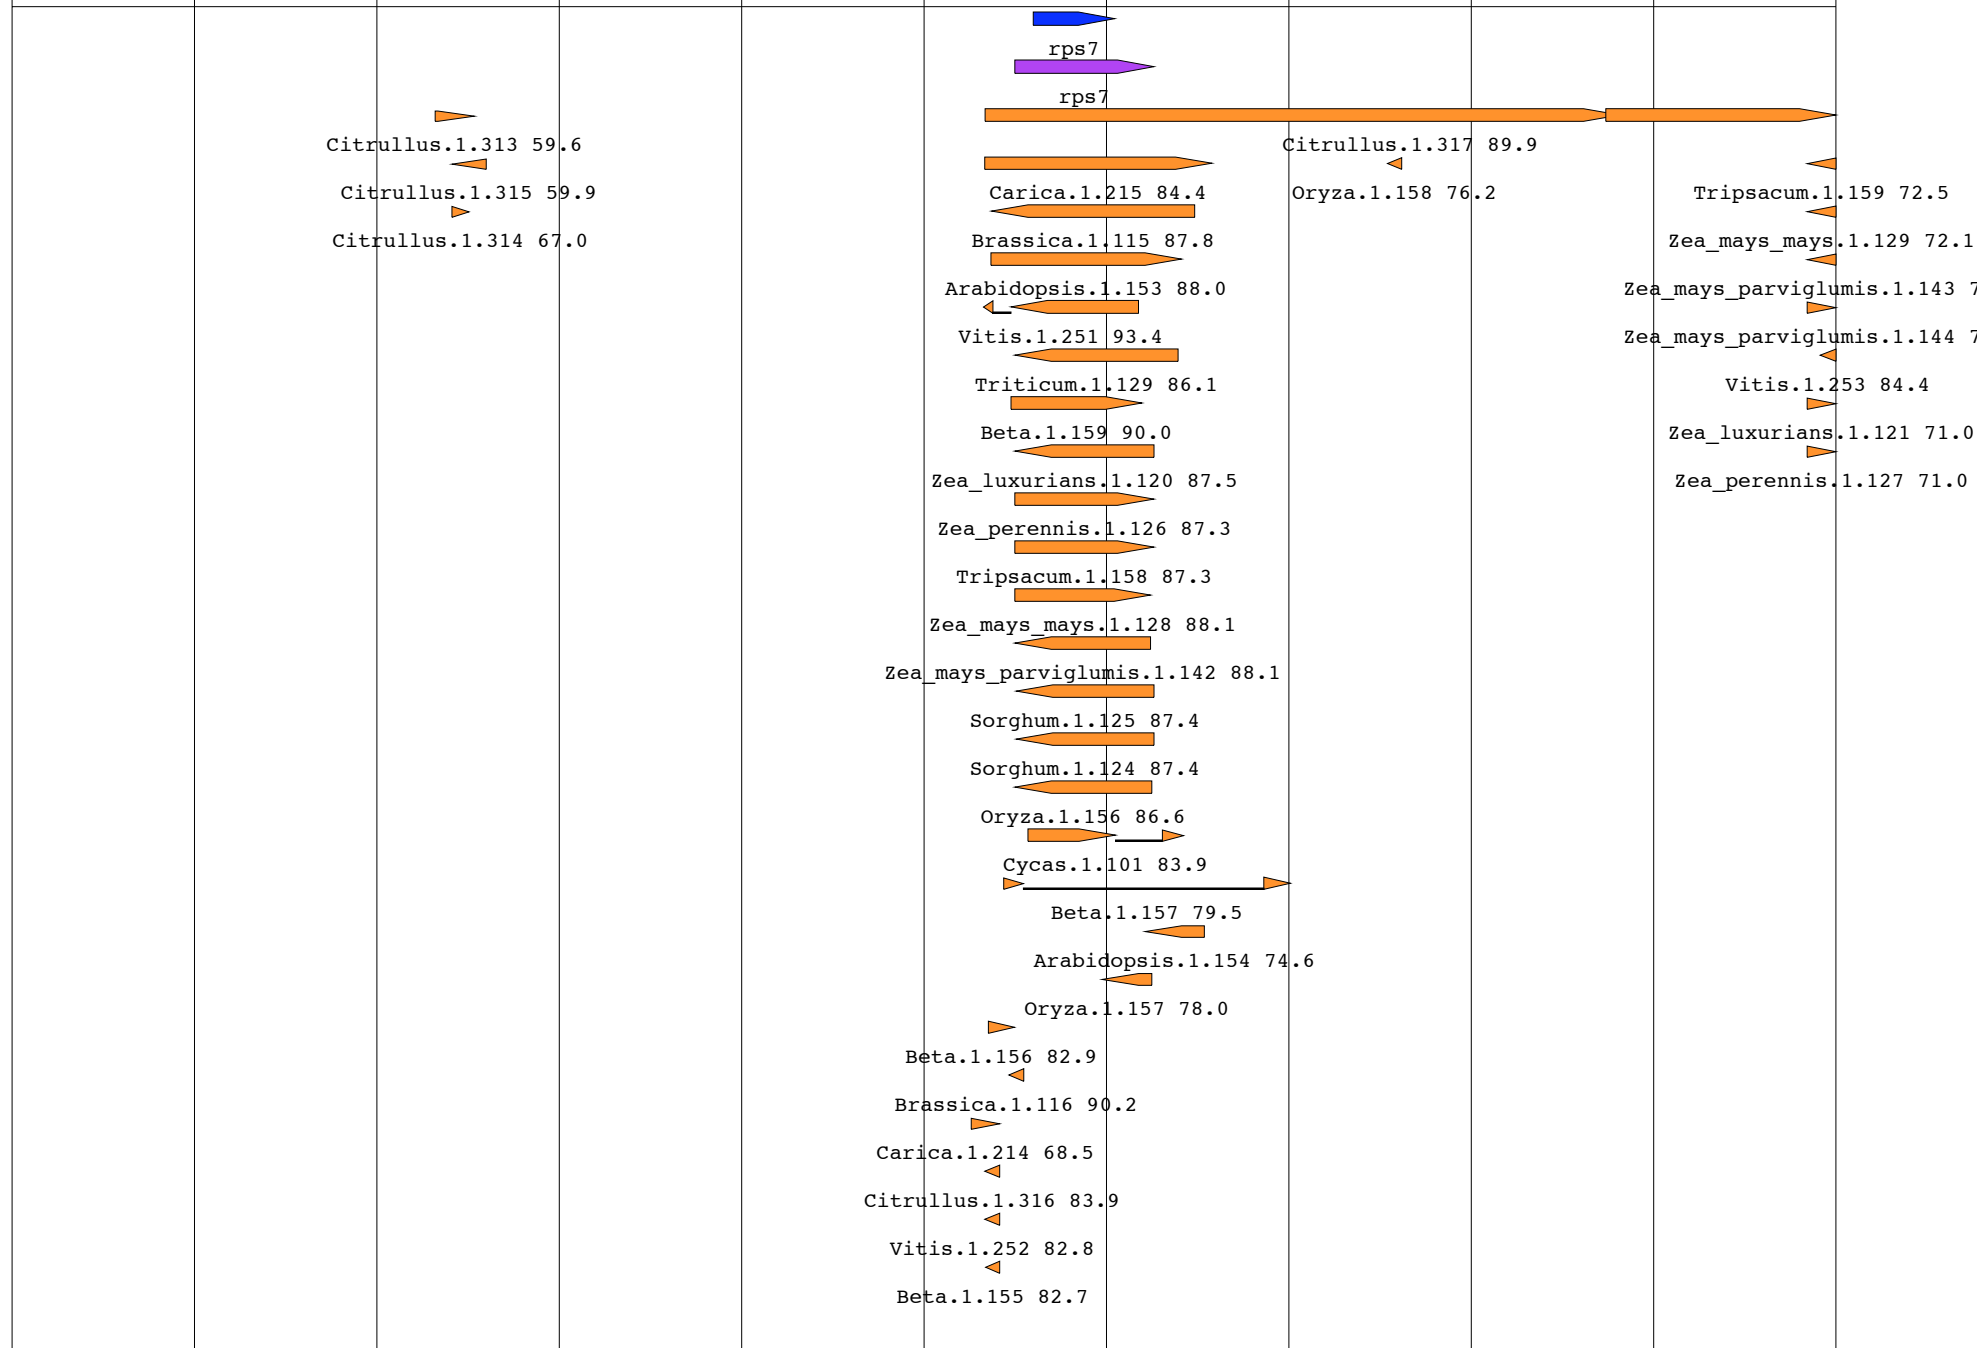

sequence: Cucurbita length: 982833

790001 791001 792001 793001 794001 795001 796001 797001 798001 799001 800000

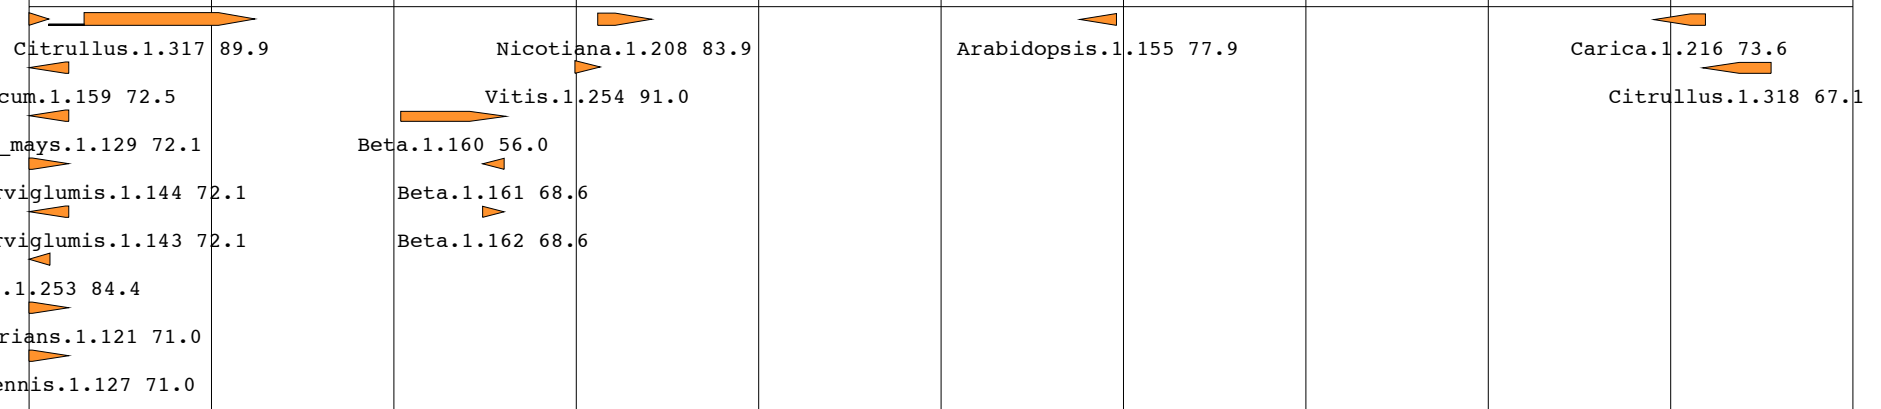



sequence: Cucurbita length: 982833

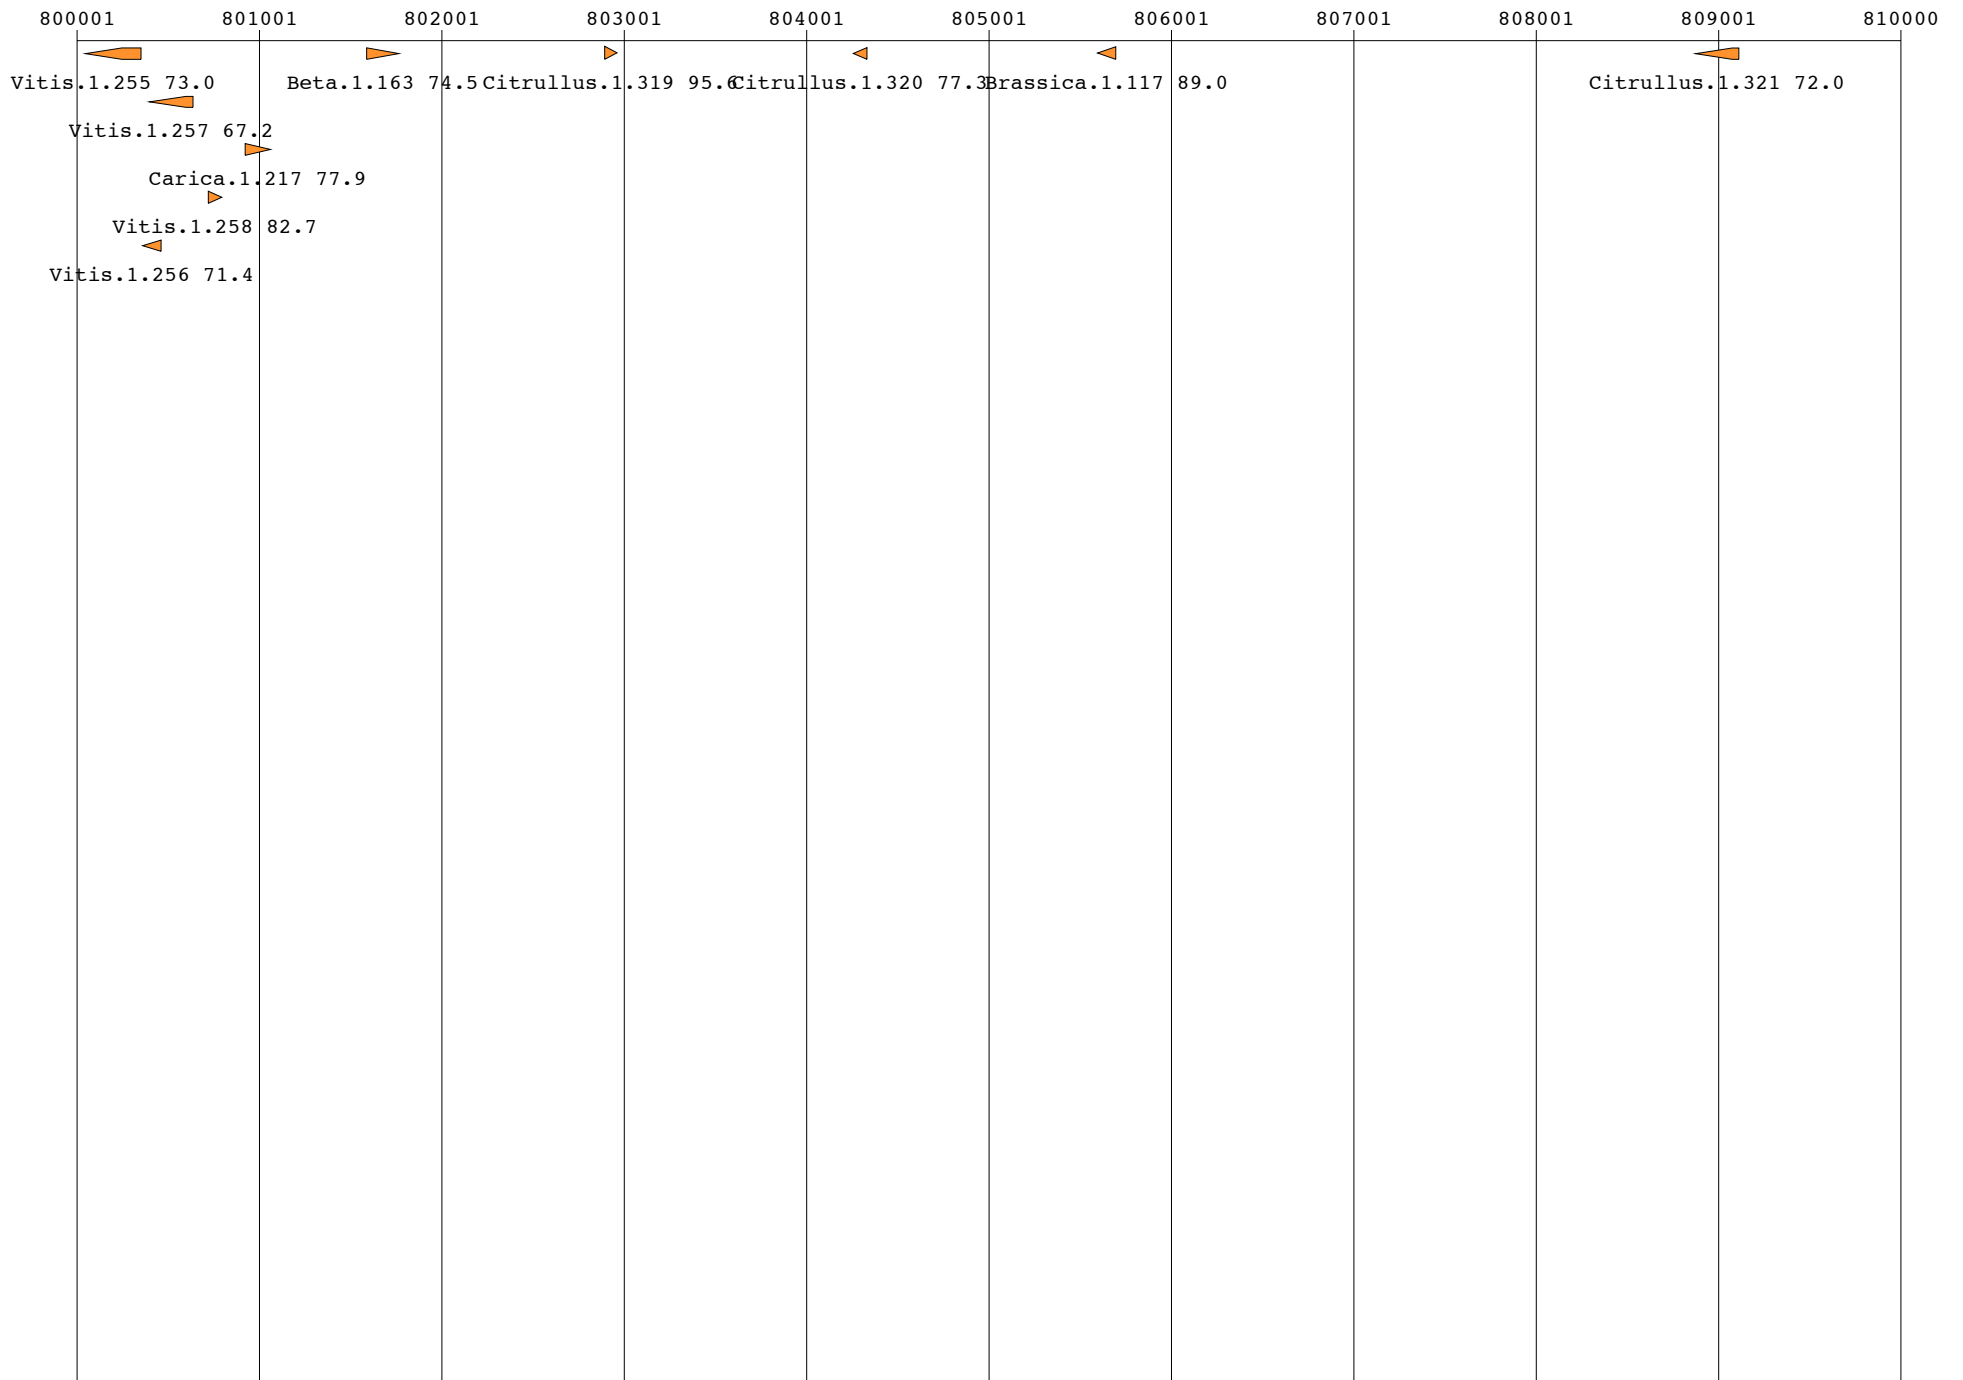

sequence: Cucurbita length: 982833

810001      811001      812001      813001      814001      815001      816001      817001      818001      819001      820000

Citrullus.1.322 78.4 Vitis.1.260 65.8  
Vitis.1.259 59.9  
Arabidopsis.1.156 64.5

sequence: Cucurbita length: 982833

820001 821001 822001 823001 824001 825001 826001 827001 828001 829001 830000

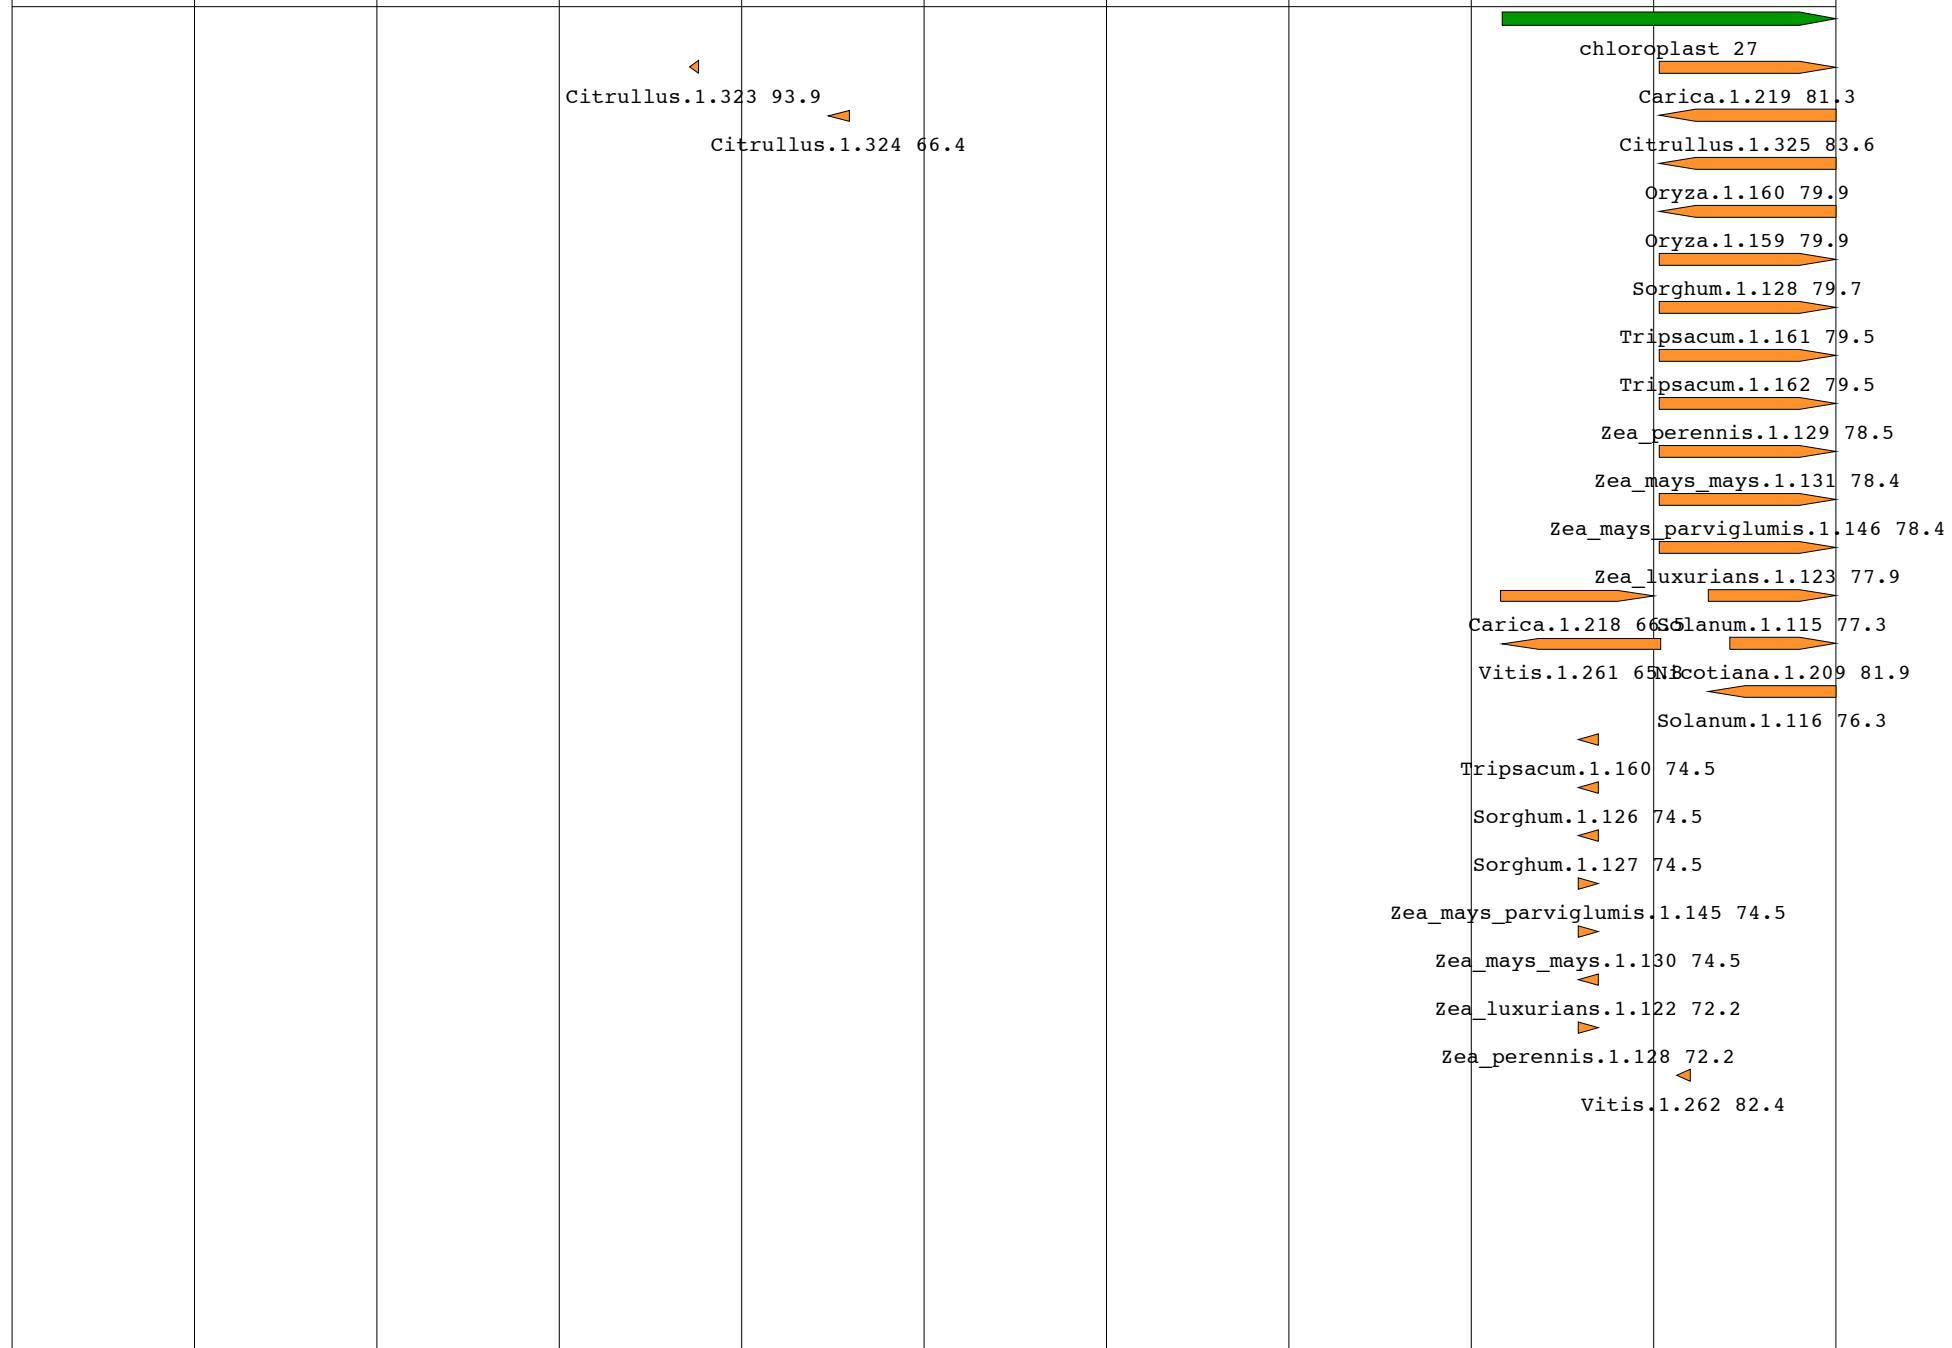

sequence: Cucurbita length: 982833

830001 831001 832001 833001 834001 835001 836001 837001 838001 839001 840000

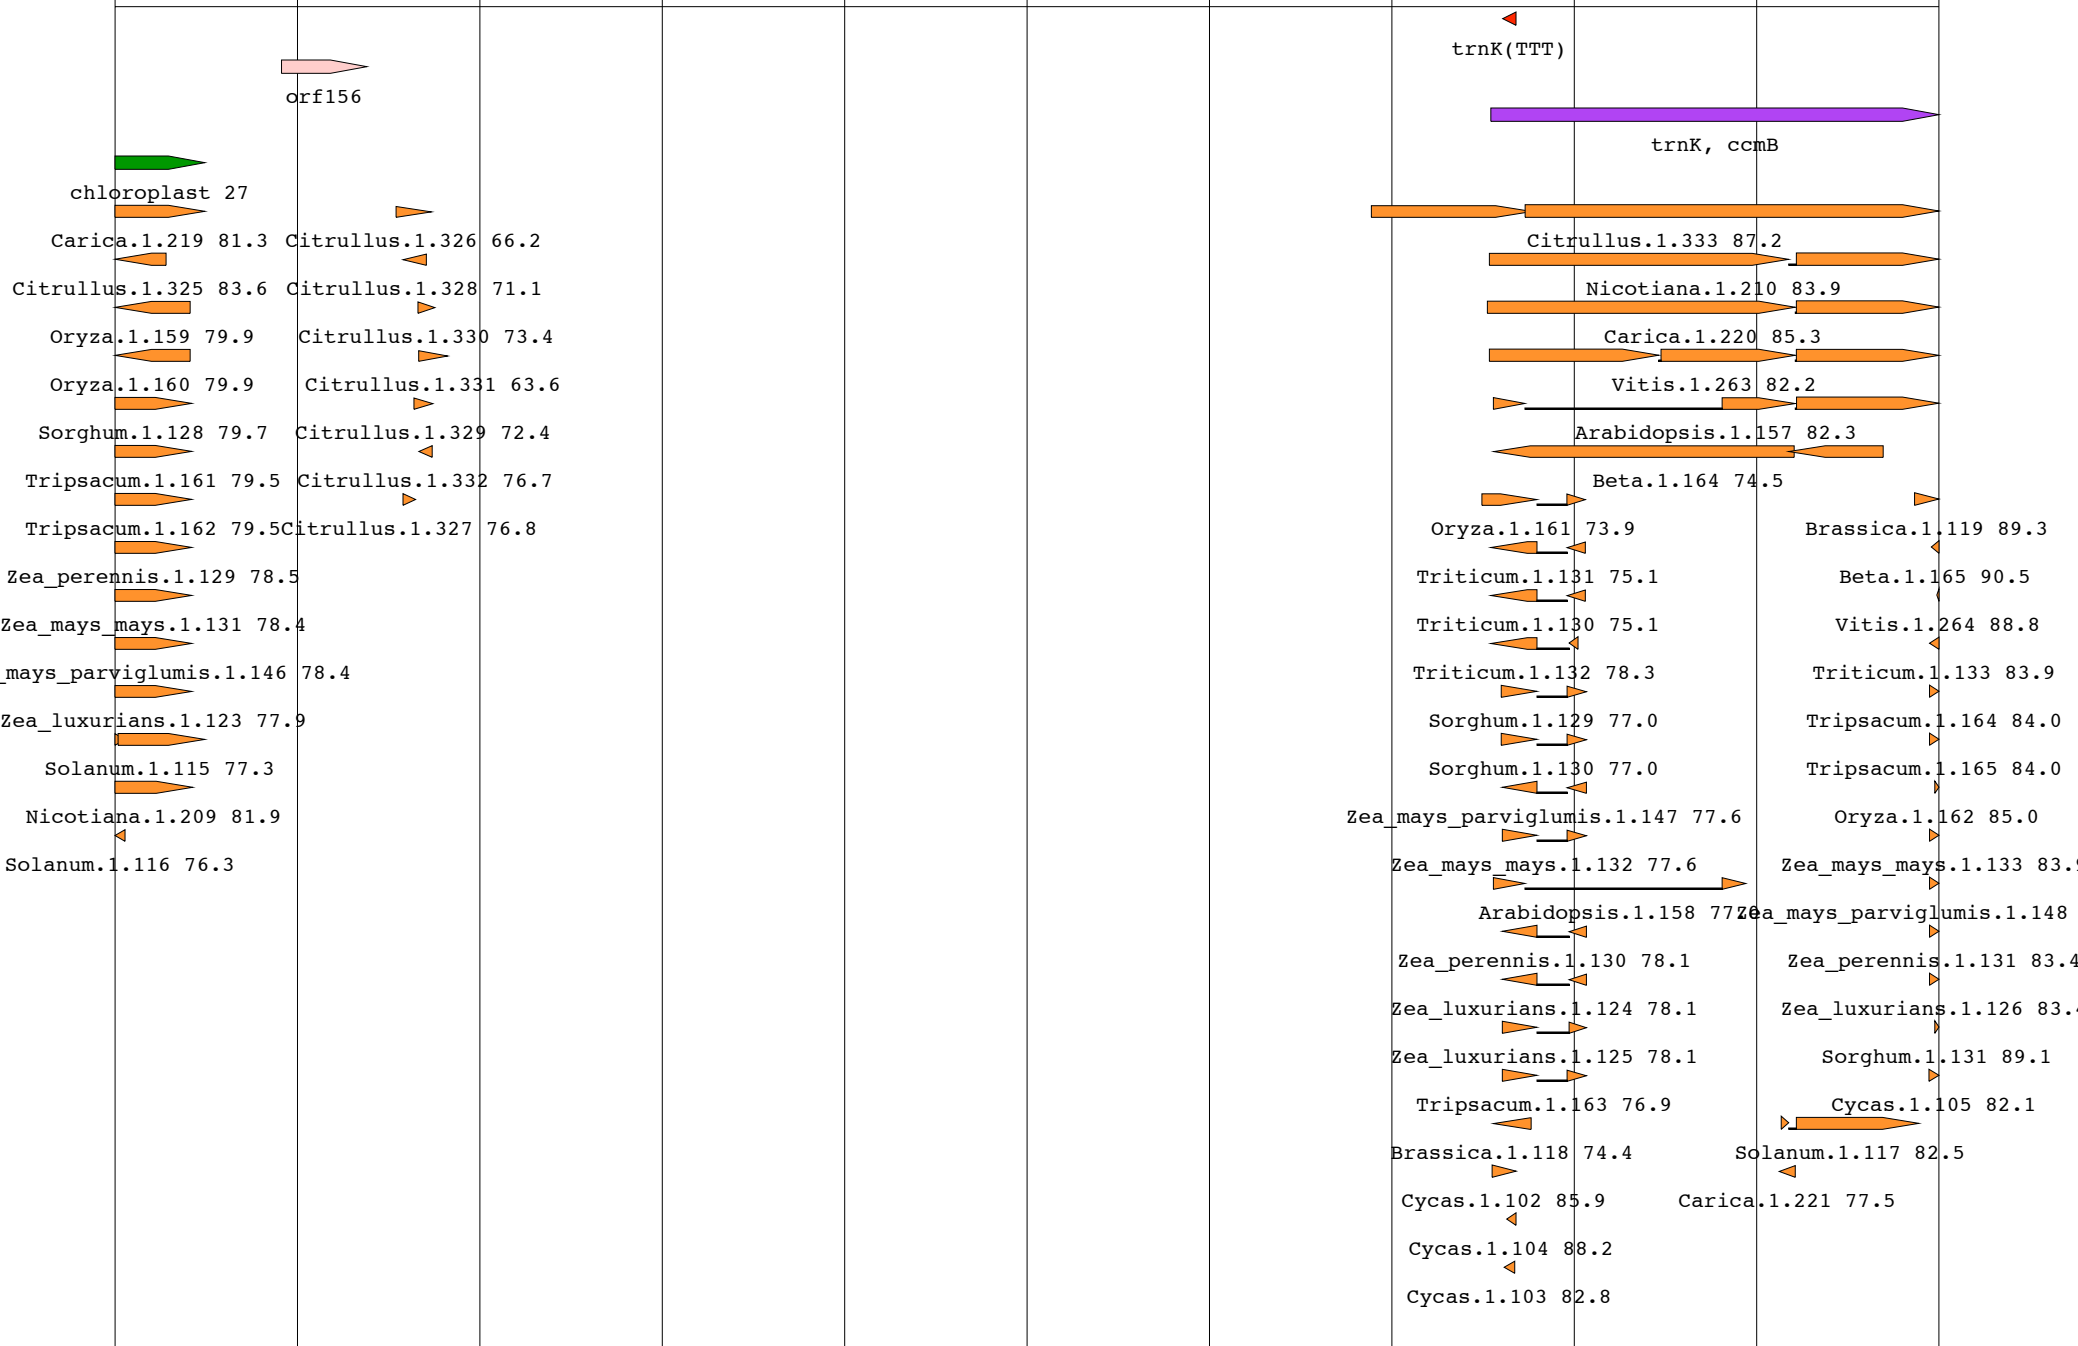

sequence: Cucurbita length: 982833

840001 841001 842001 843001 844001 845001 846001 847001 848001 849001 850000

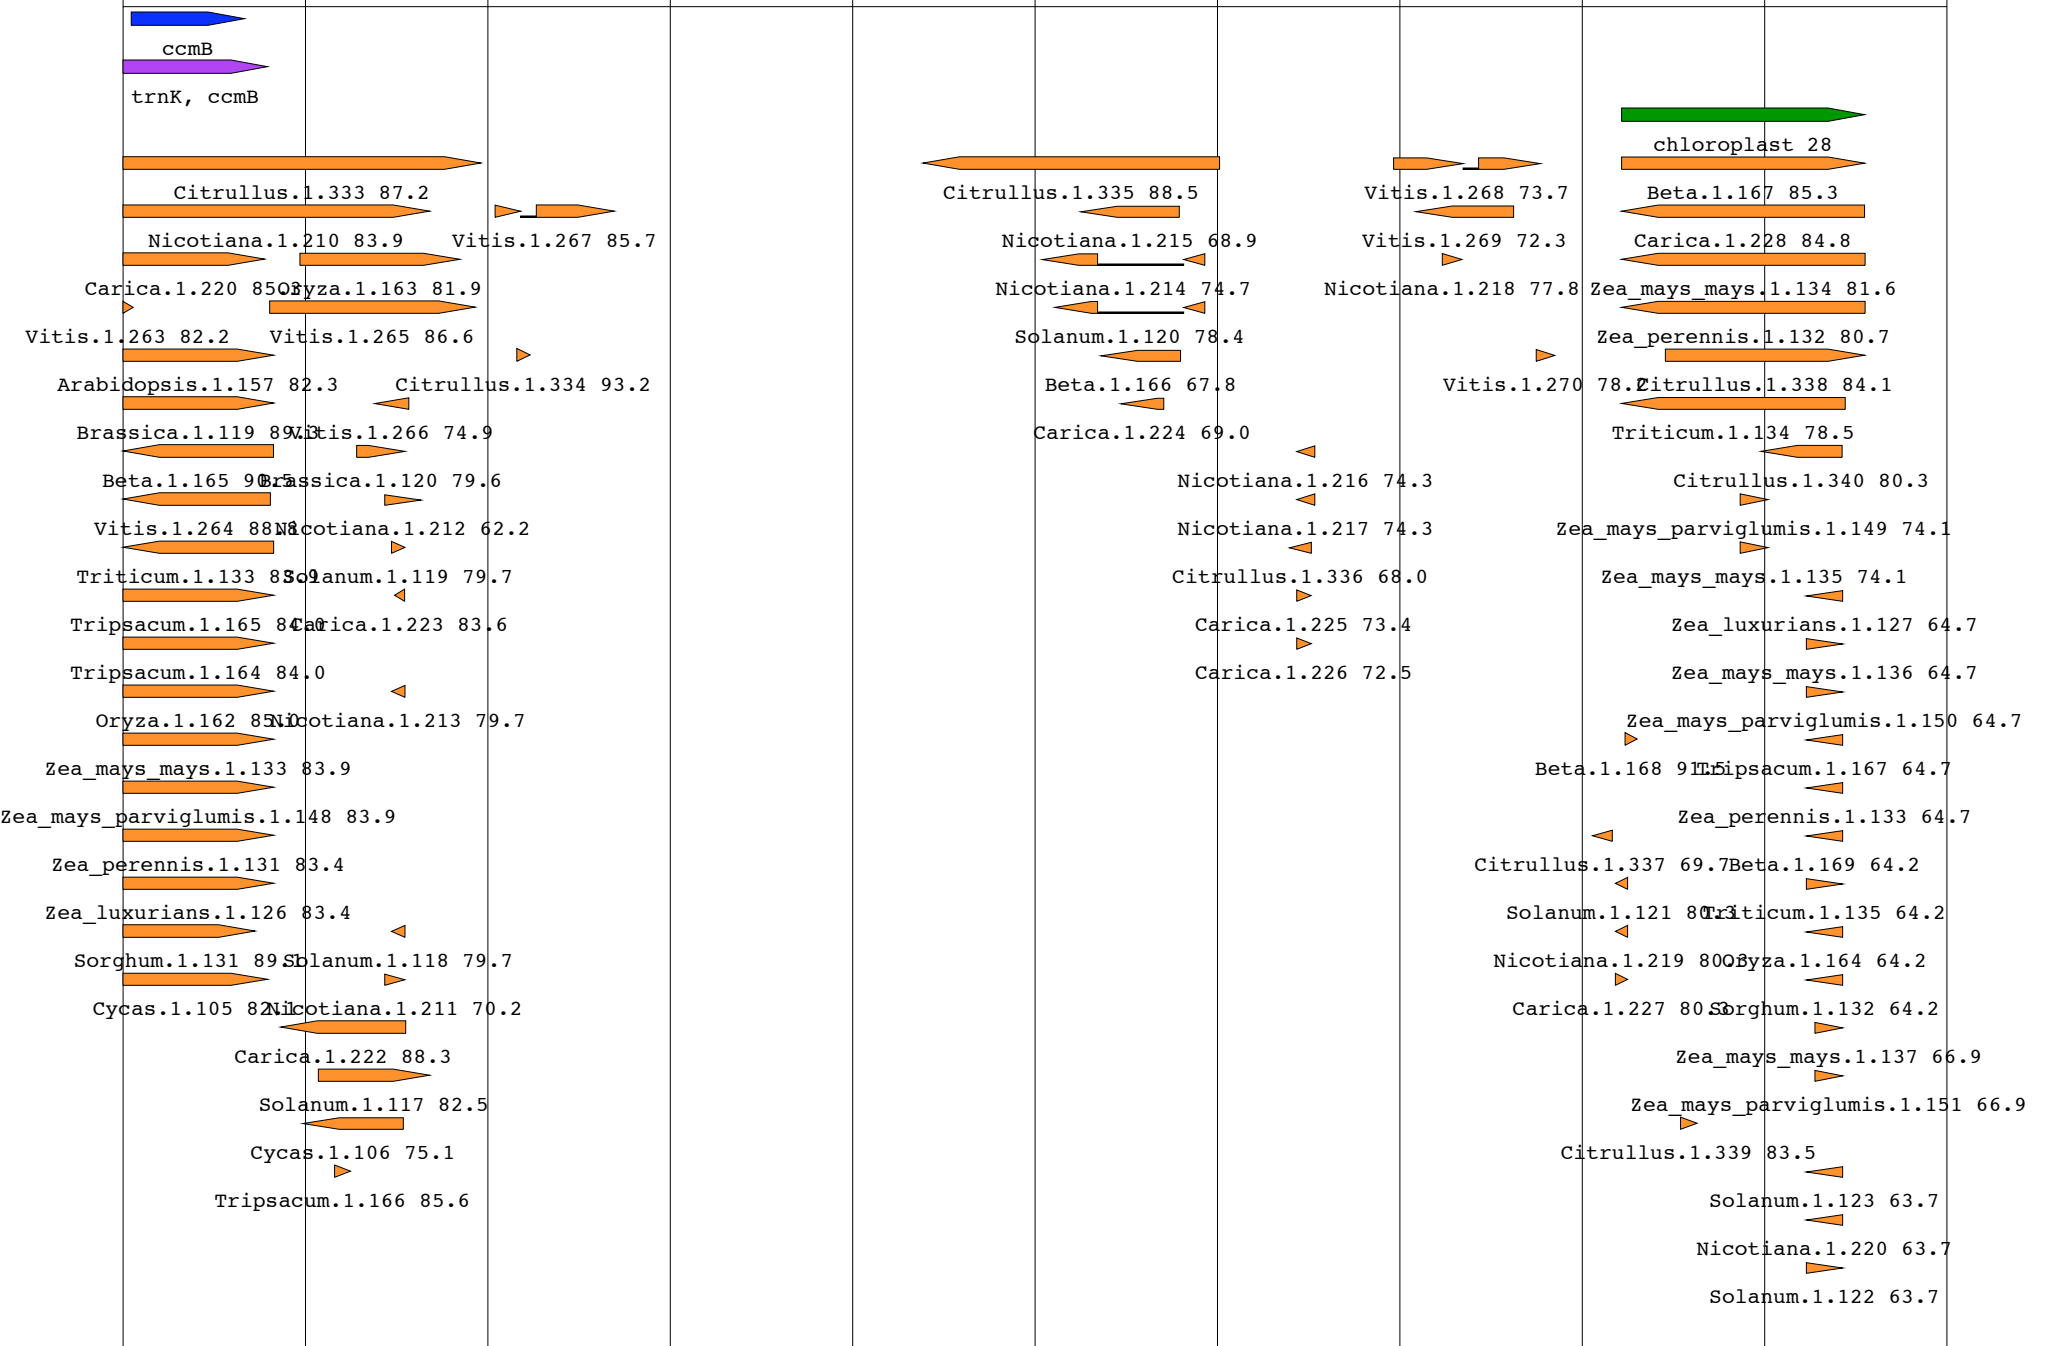

sequence: Cucurbita length: 982833

850001      851001      852001      853001      854001      855001      856001      857001      858001      859001      860000



Arabidopsis.1.160 83.8  
▶  
Vitis.1.273 86.9  
▶  
Carica.1.230 83.6

sequence: Cucurbita length: 982833

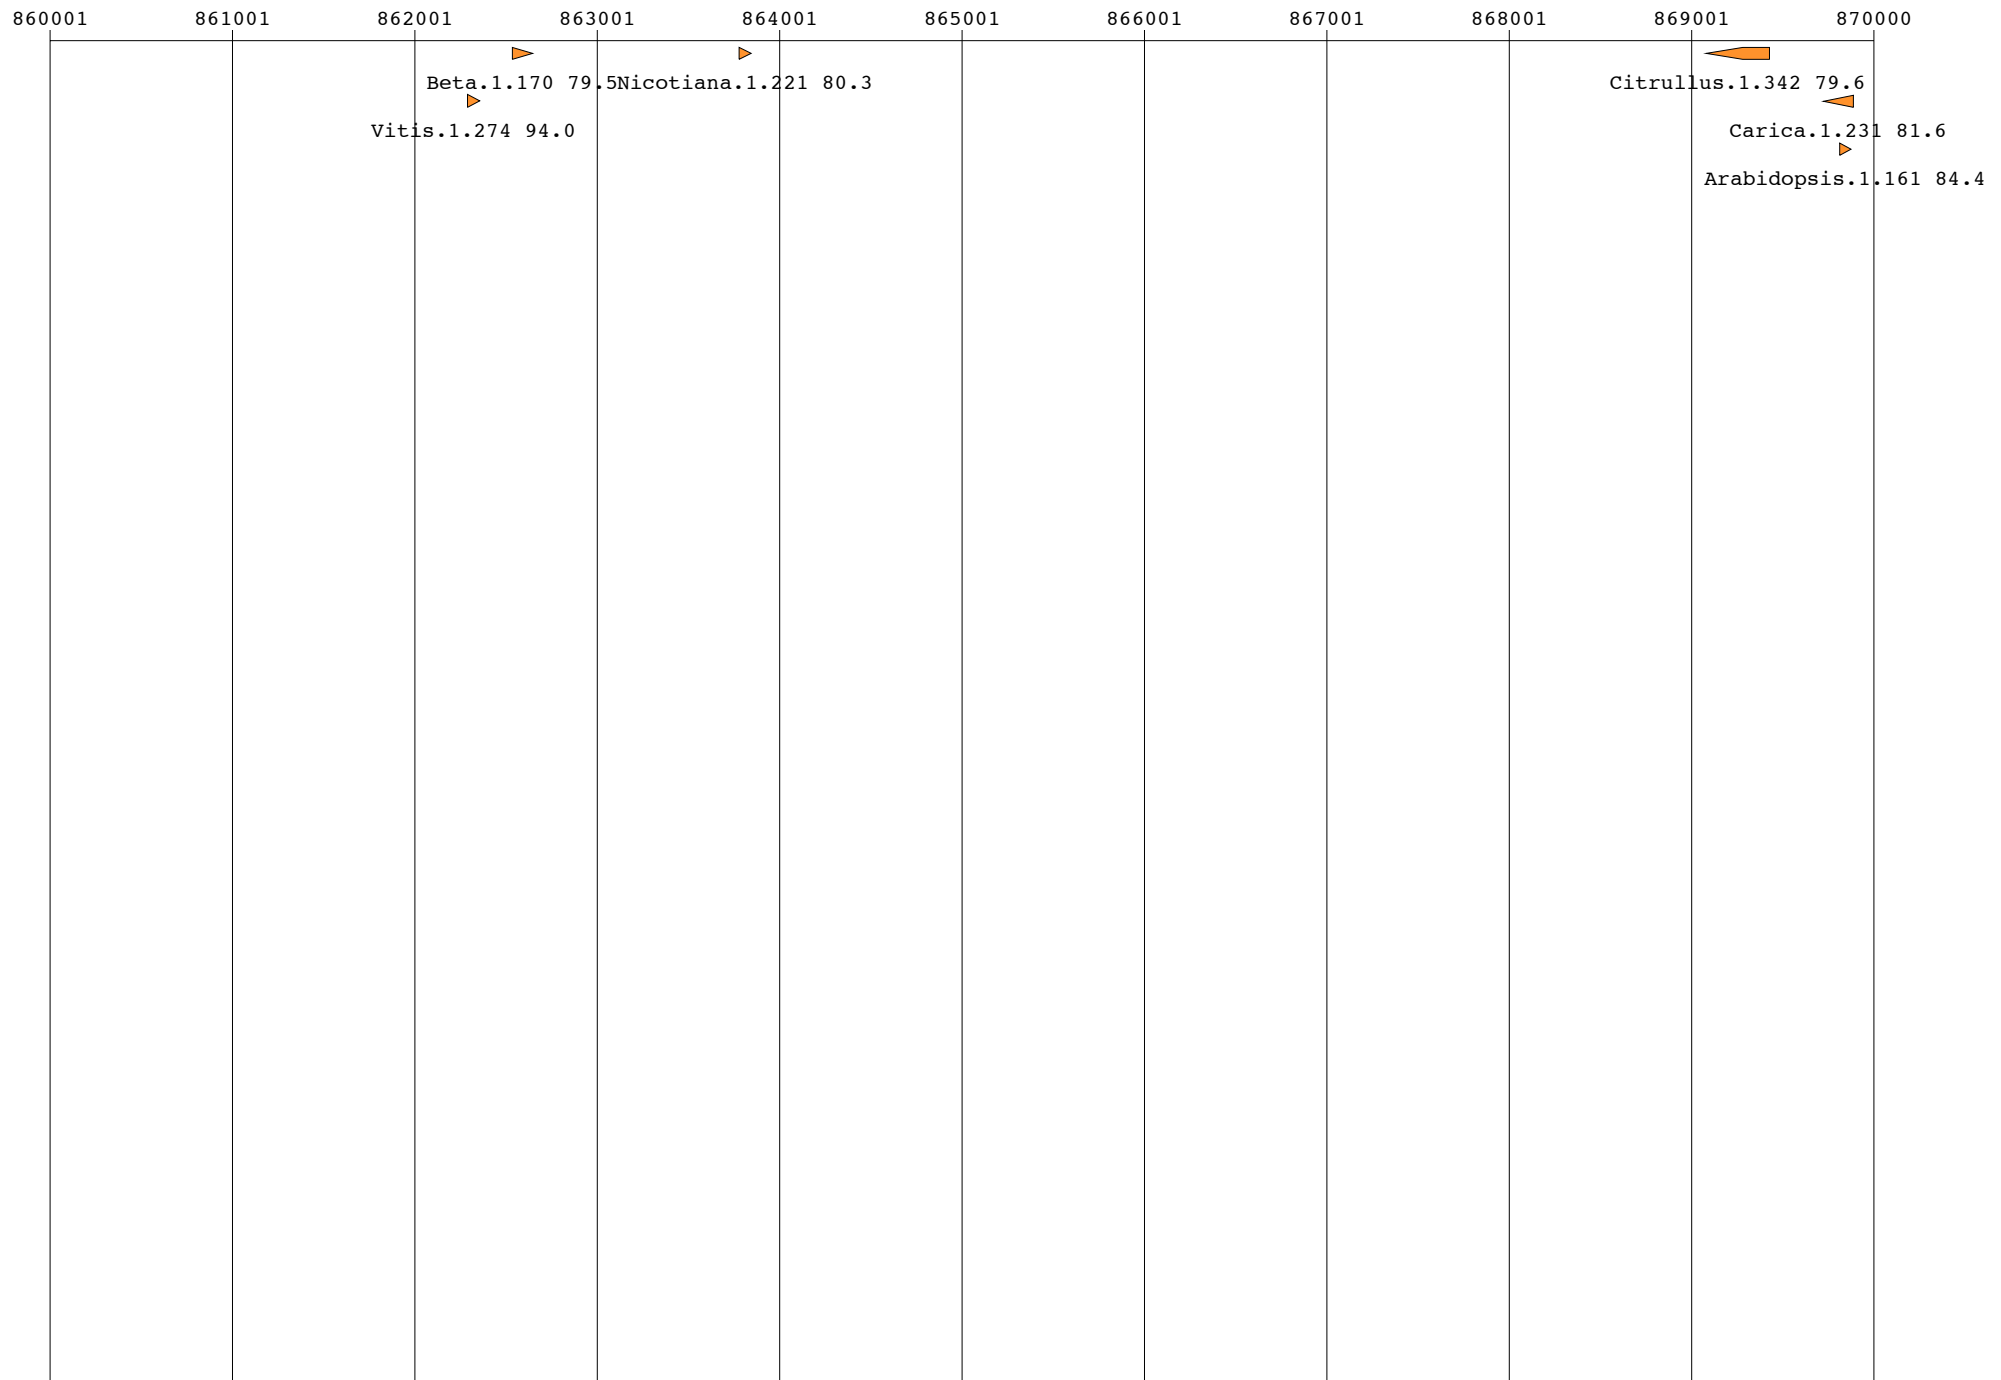

sequence: Cucurbita length: 982833

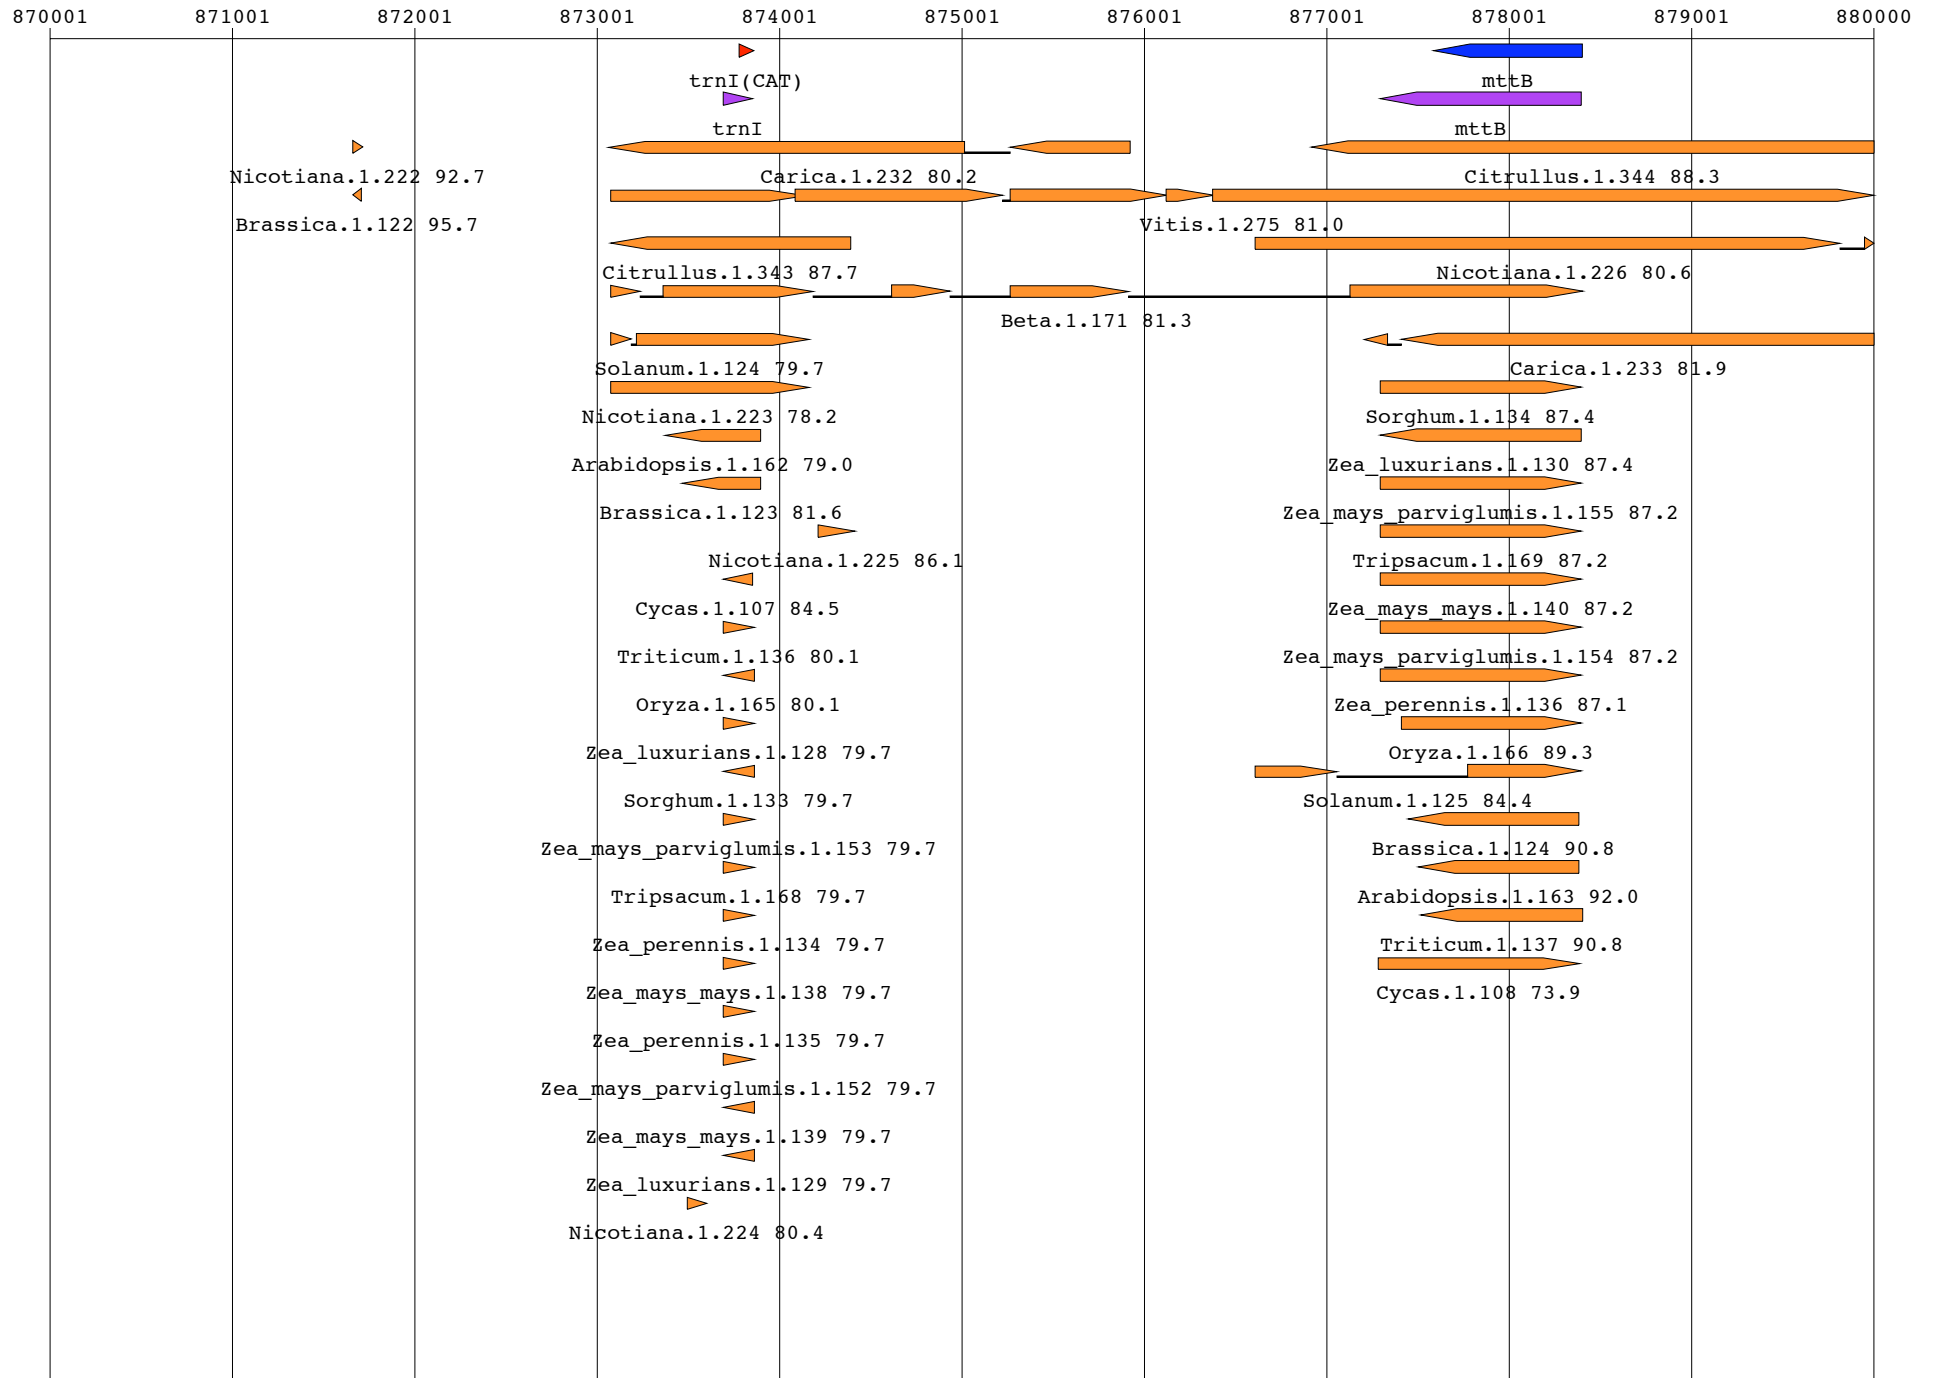



sequence: Cucurbita length: 982833

880001 881001 882001 883001 884001 885001 886001 887001 888001 889001 890000

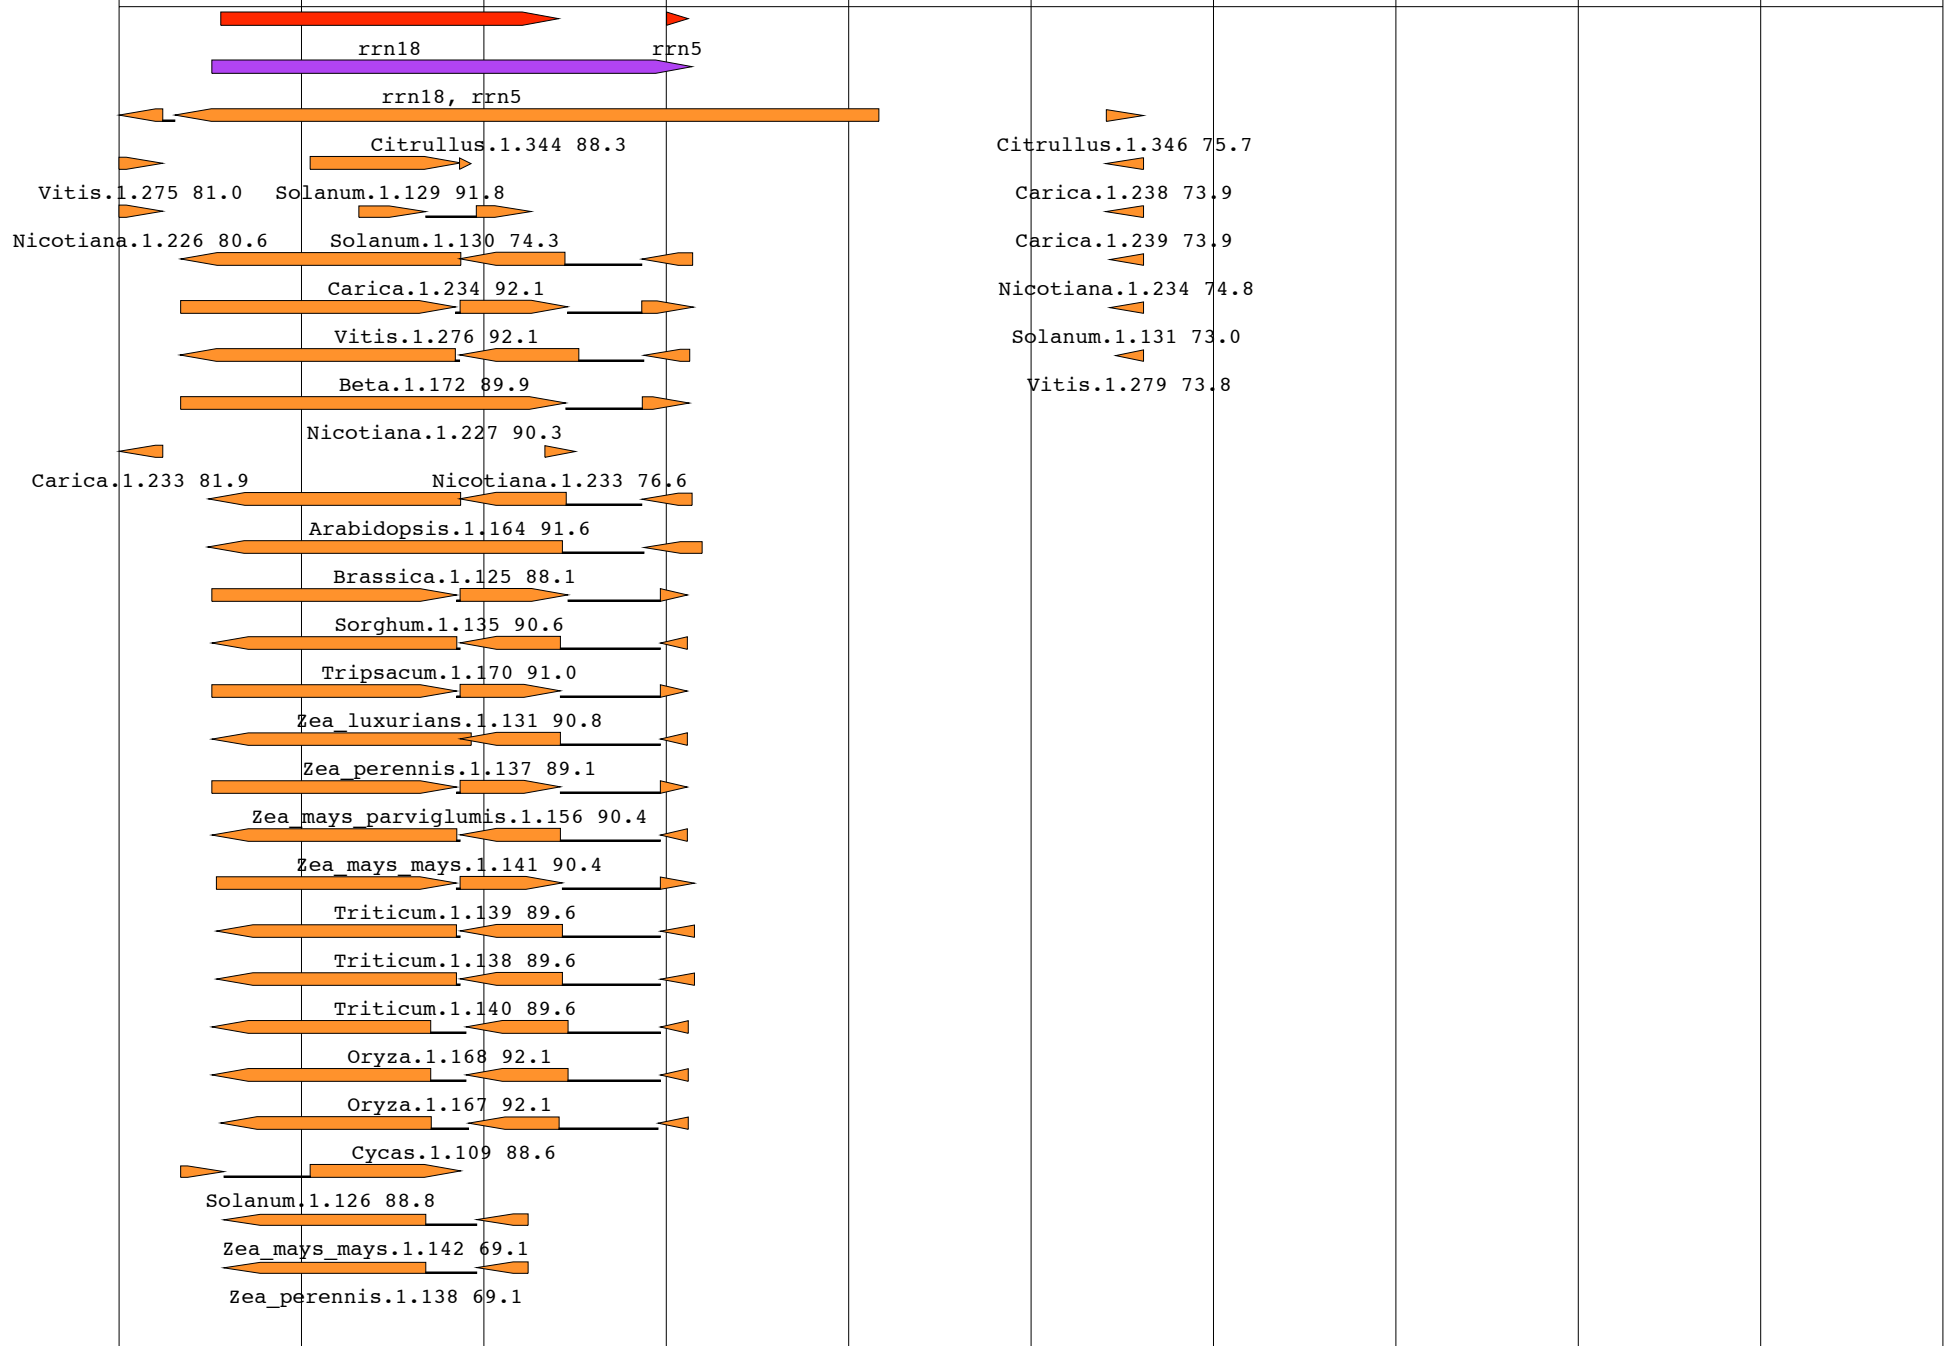

sequence: Cucurbita length: 982833

890001      891001      892001      893001      894001      895001      896001      897001      898001      899001      900000

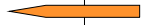

Citrullus.1.347 81.5



sequence: Cucurbita length: 982833

910001 911001 912001 913001 914001 915001 916001 917001 918001 919001 920000

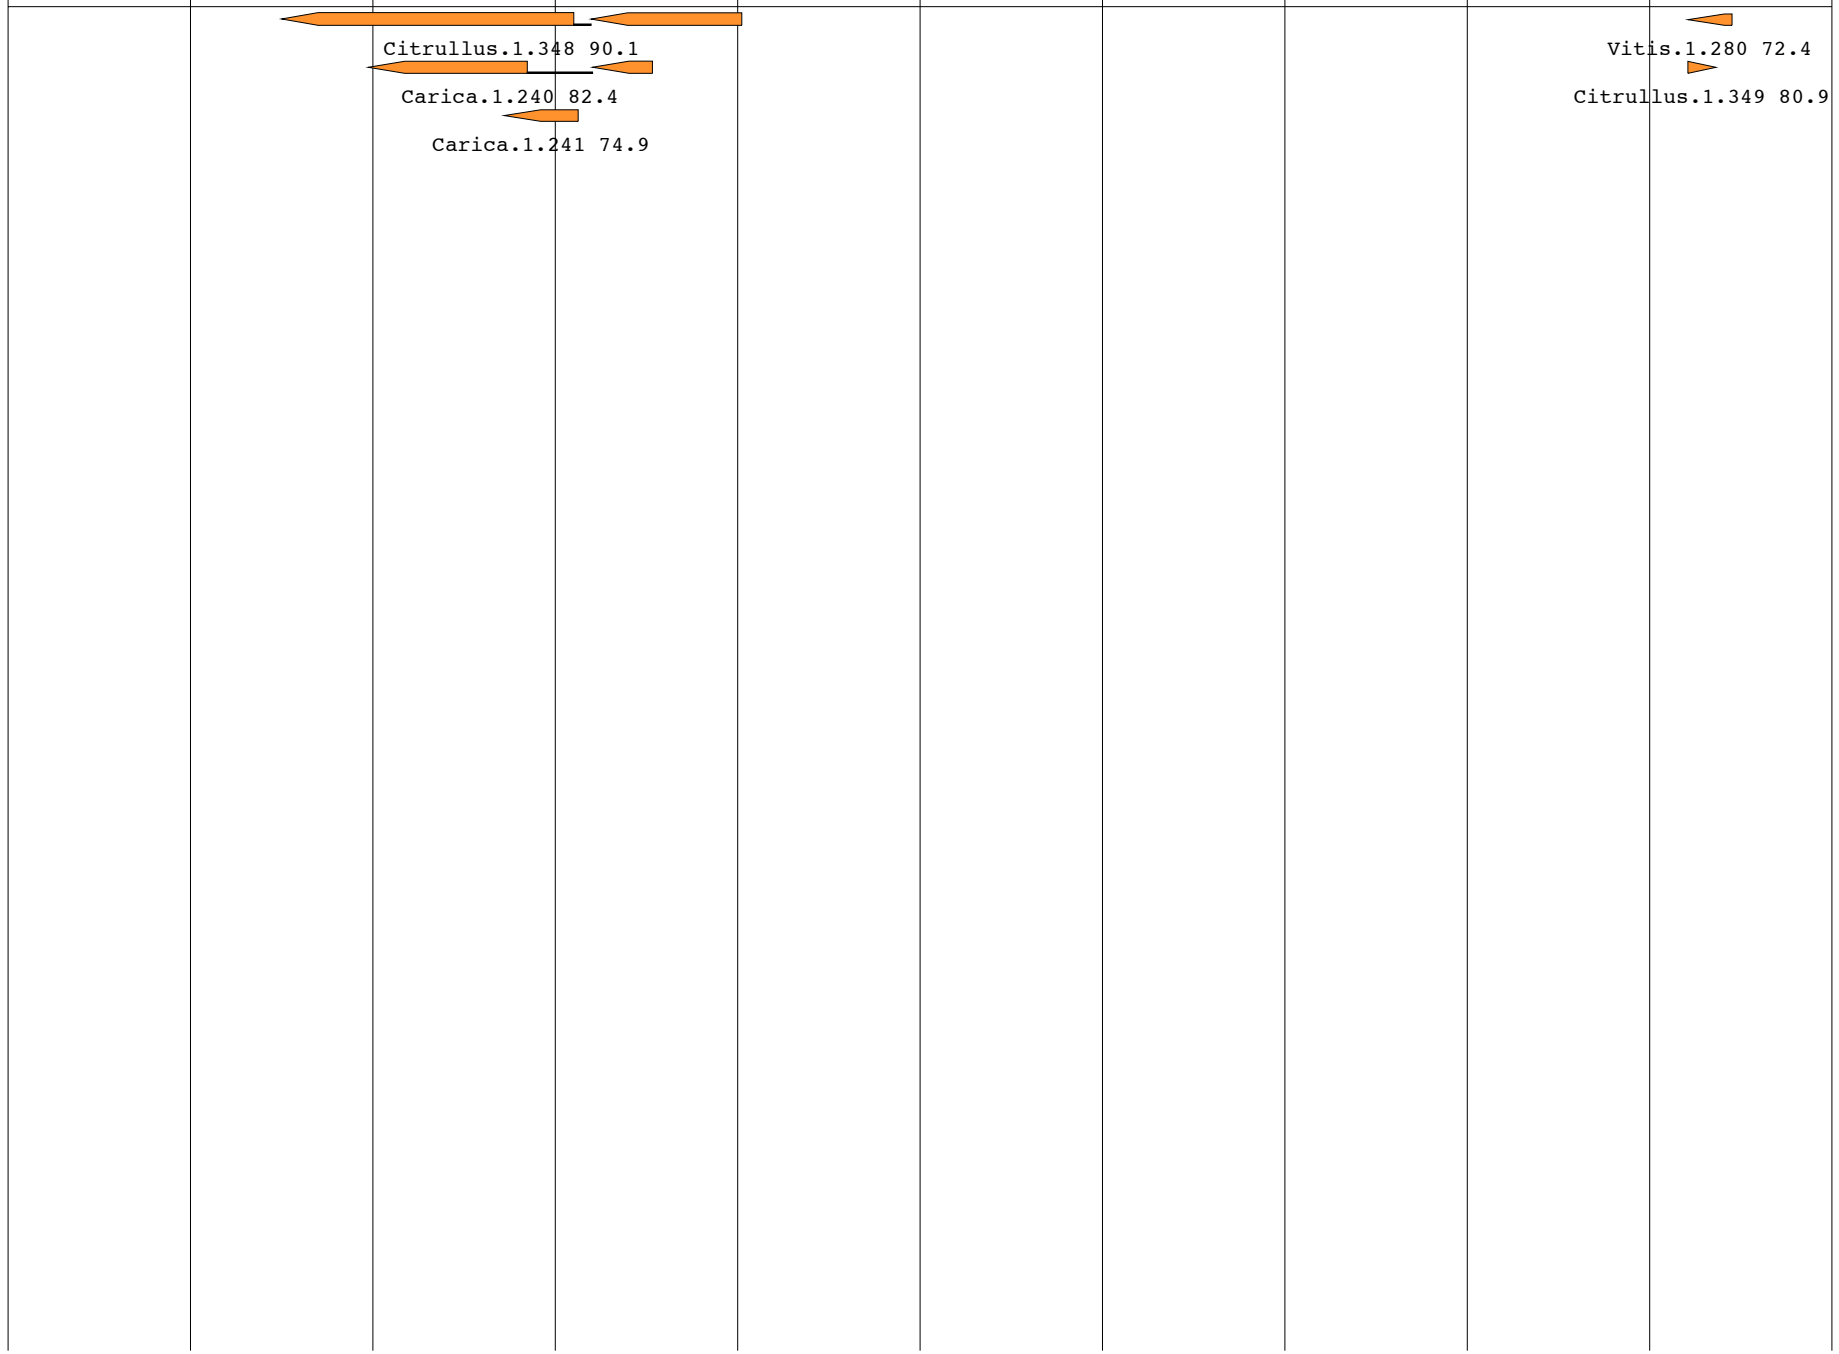

sequence: Cucurbita length: 982833

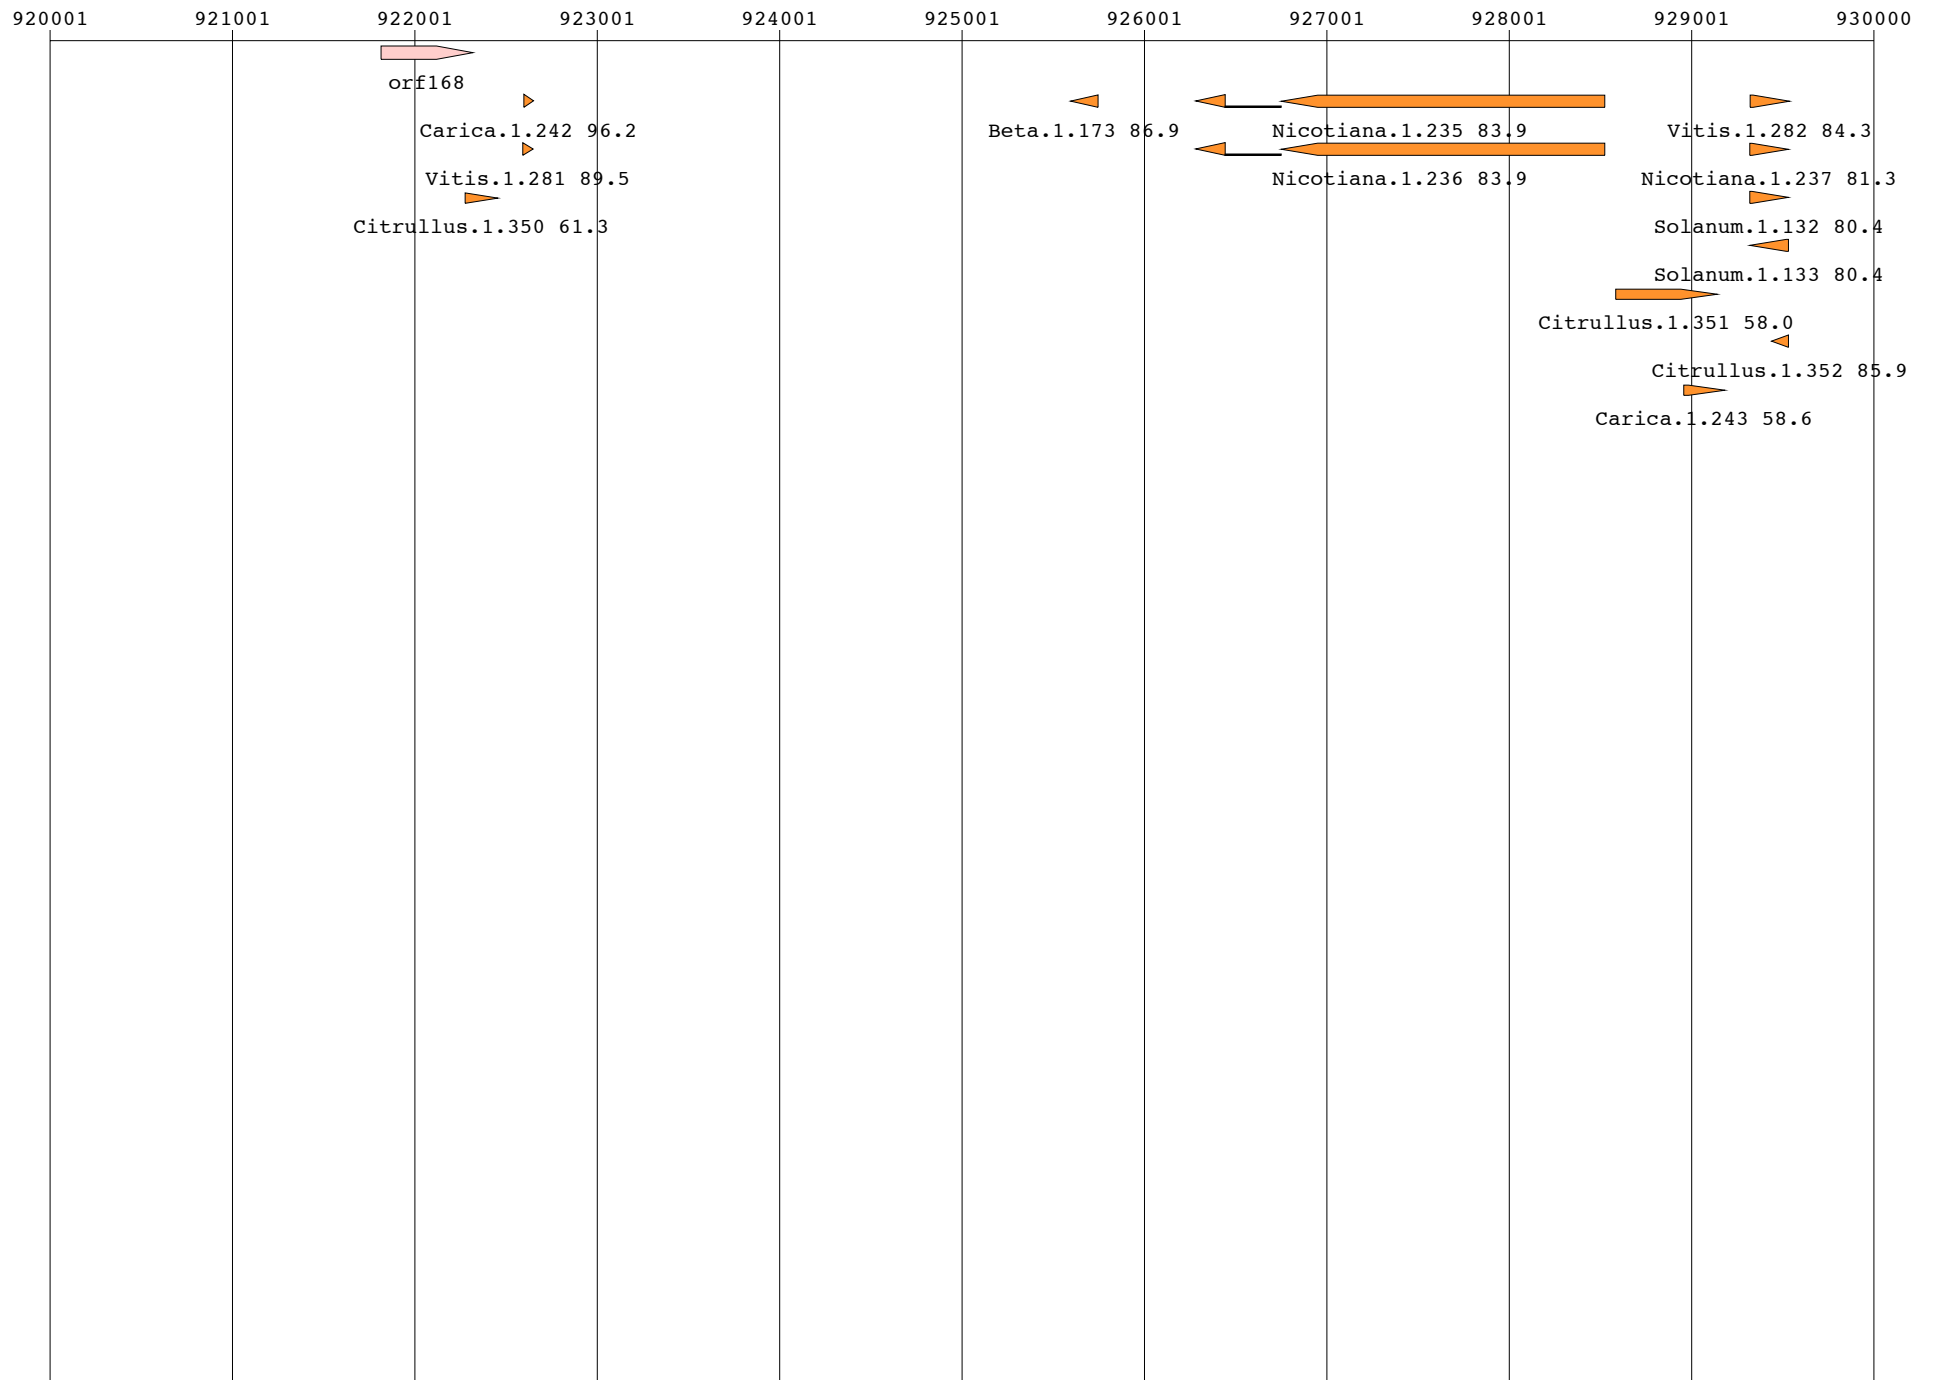

sequence: Cucurbita length: 982833

930001      931001      932001      933001      934001      935001      936001      937001      938001      939001      940000

orf101-2

Citrullus.1.356 74.4

Citrullus.1.358 74.4

Citrullus.1.360 70.7

Citrullus.1.354 72.4

Citrullus.1.361 72.0

Citrullus.1.359 68.3

Citrullus.1.357 66.8

Citrullus.1.355 76.9

Citrullus.1.353 71.9

Citrullus.1.362 82.8

sequence: Cucurbita length: 982833

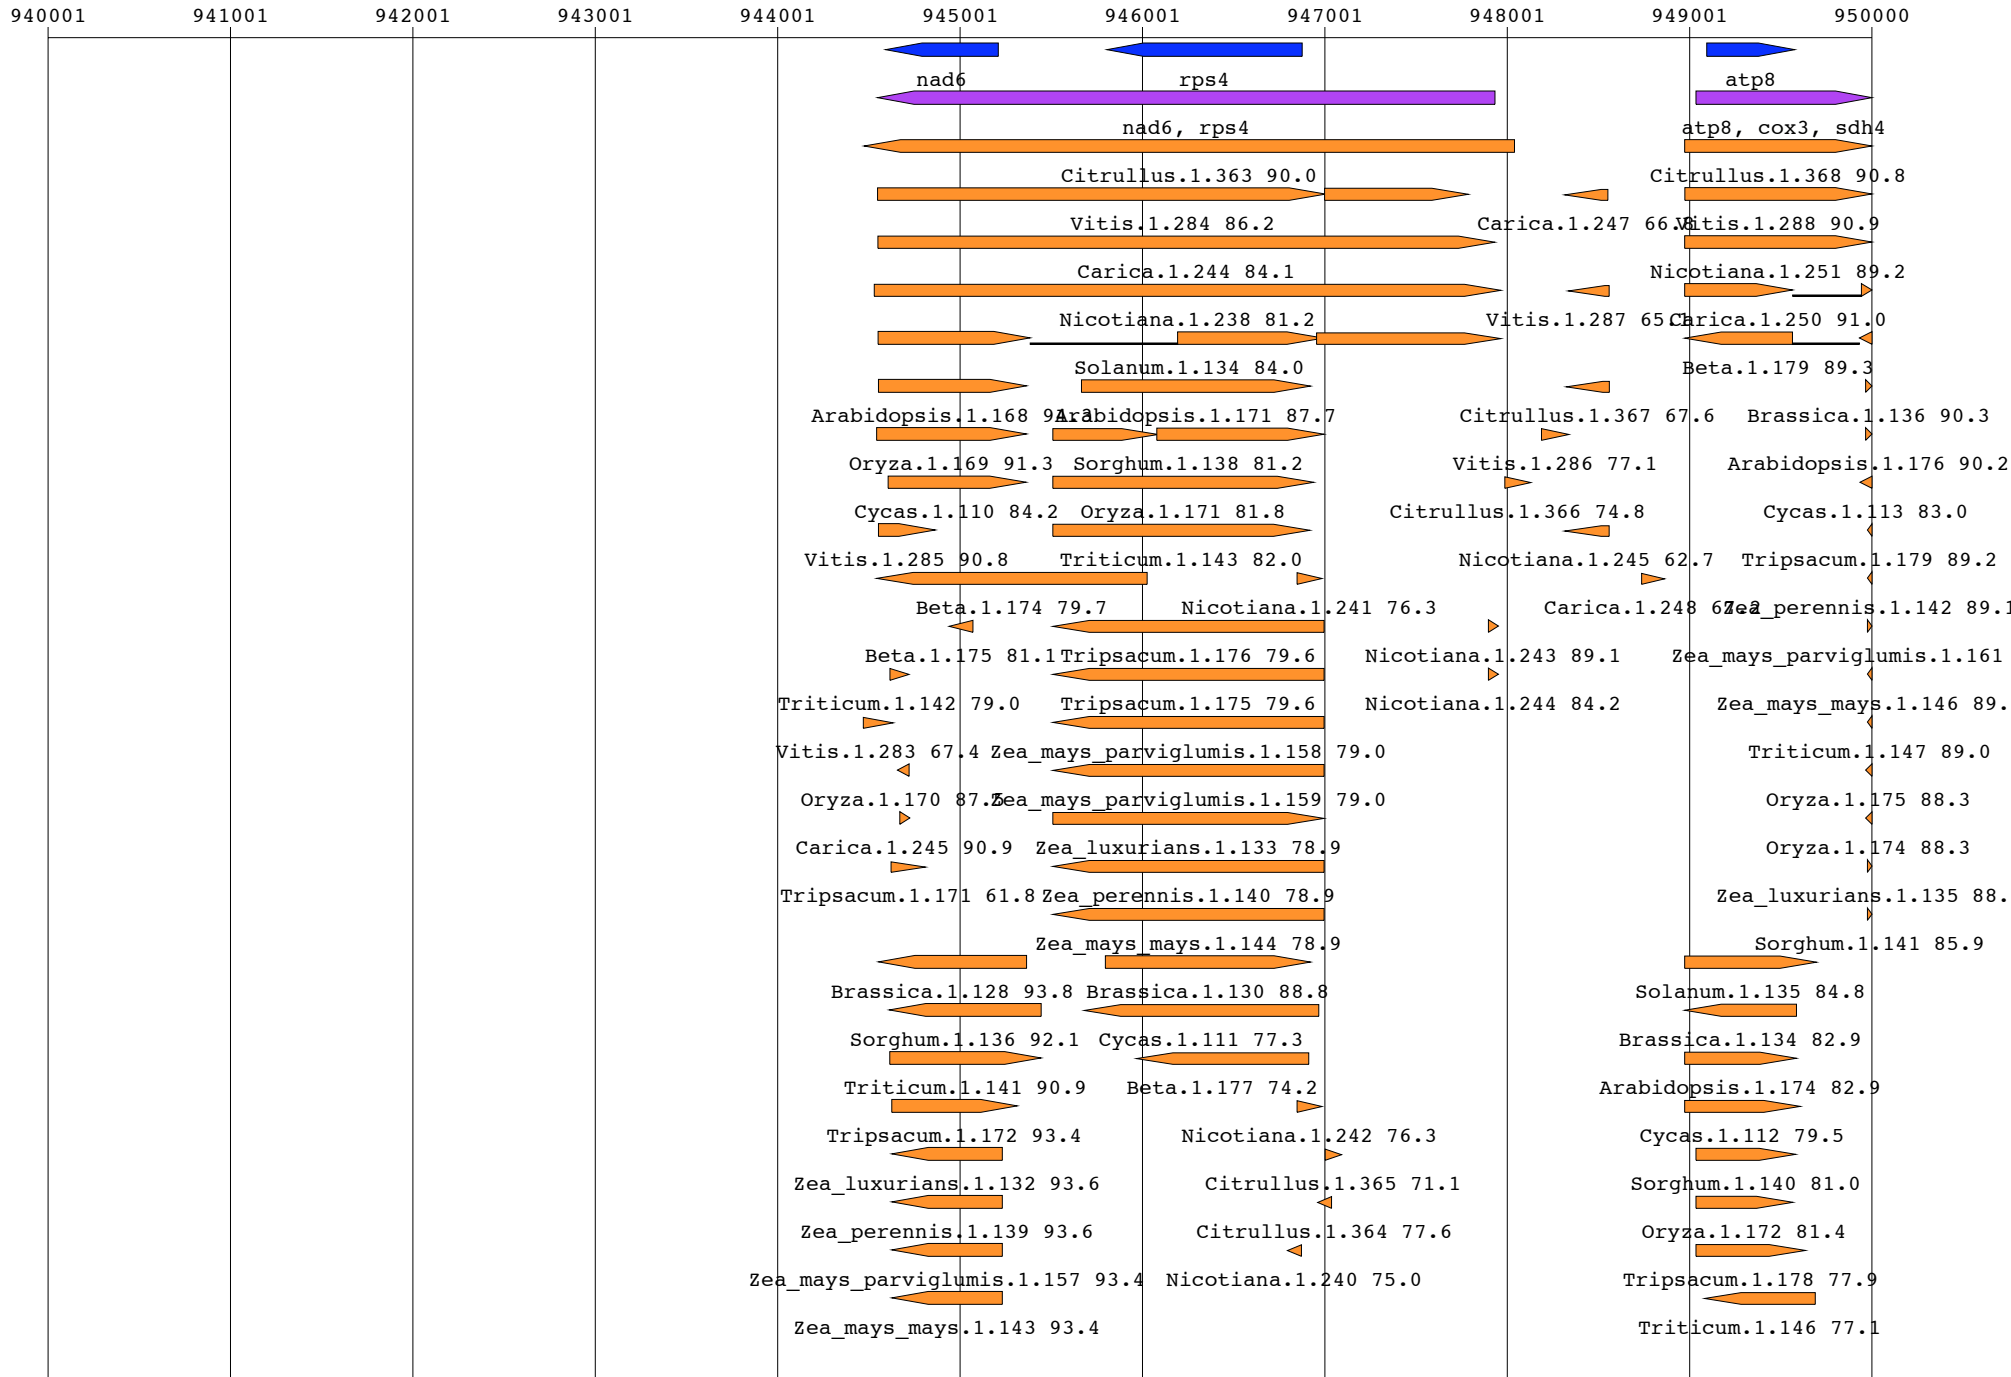

sequence: Cucurbita length: 982833

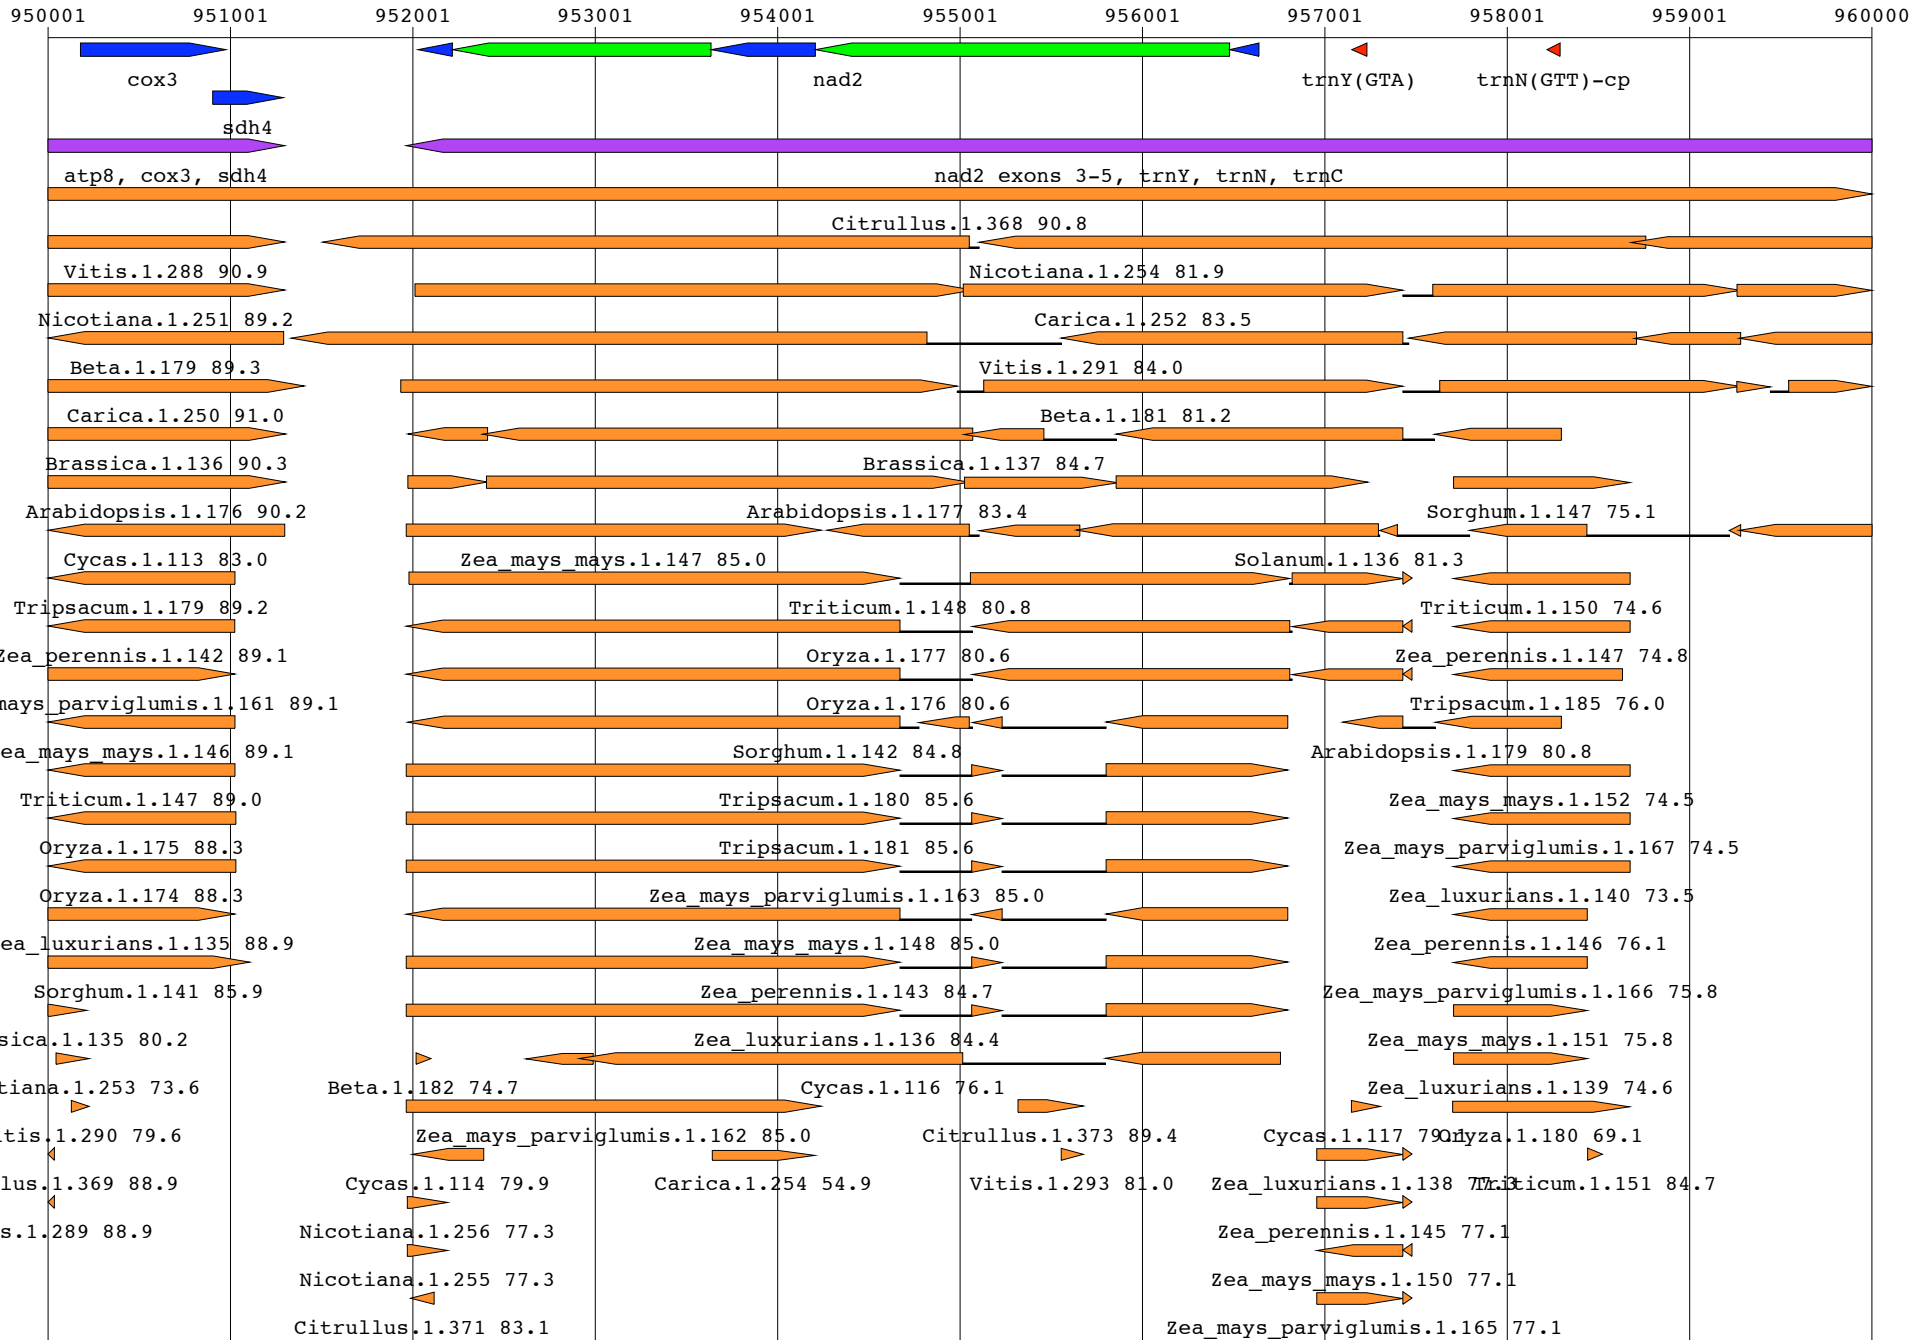



sequence: Cucurbita length: 982833

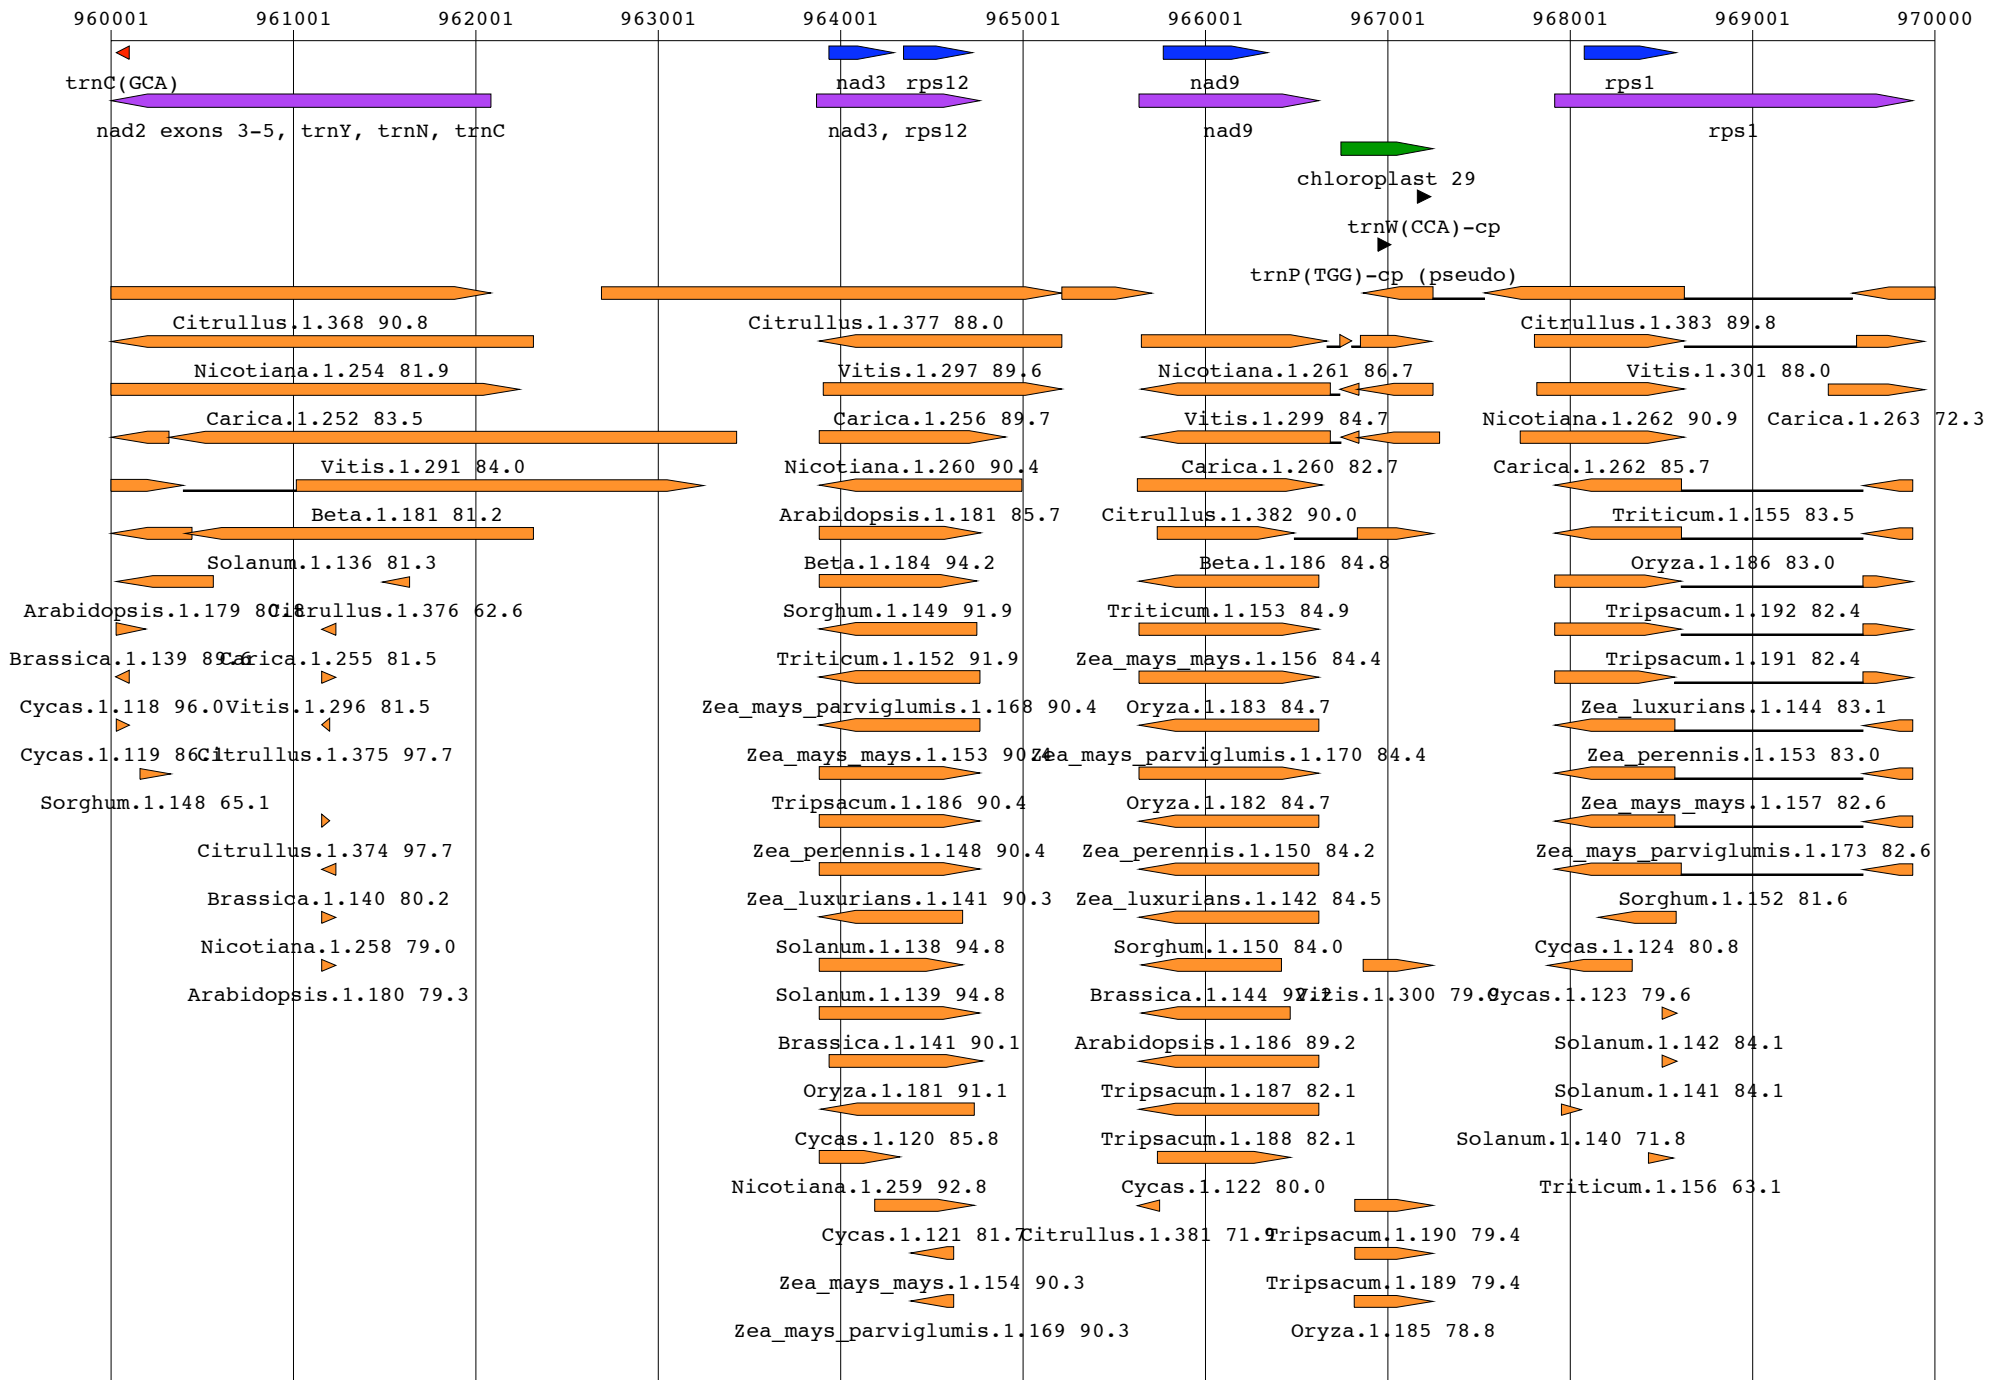

sequence: Cucurbita length: 982833

970001 971001 972001 973001 974001 975001 976001 977001 978001 979001 980000

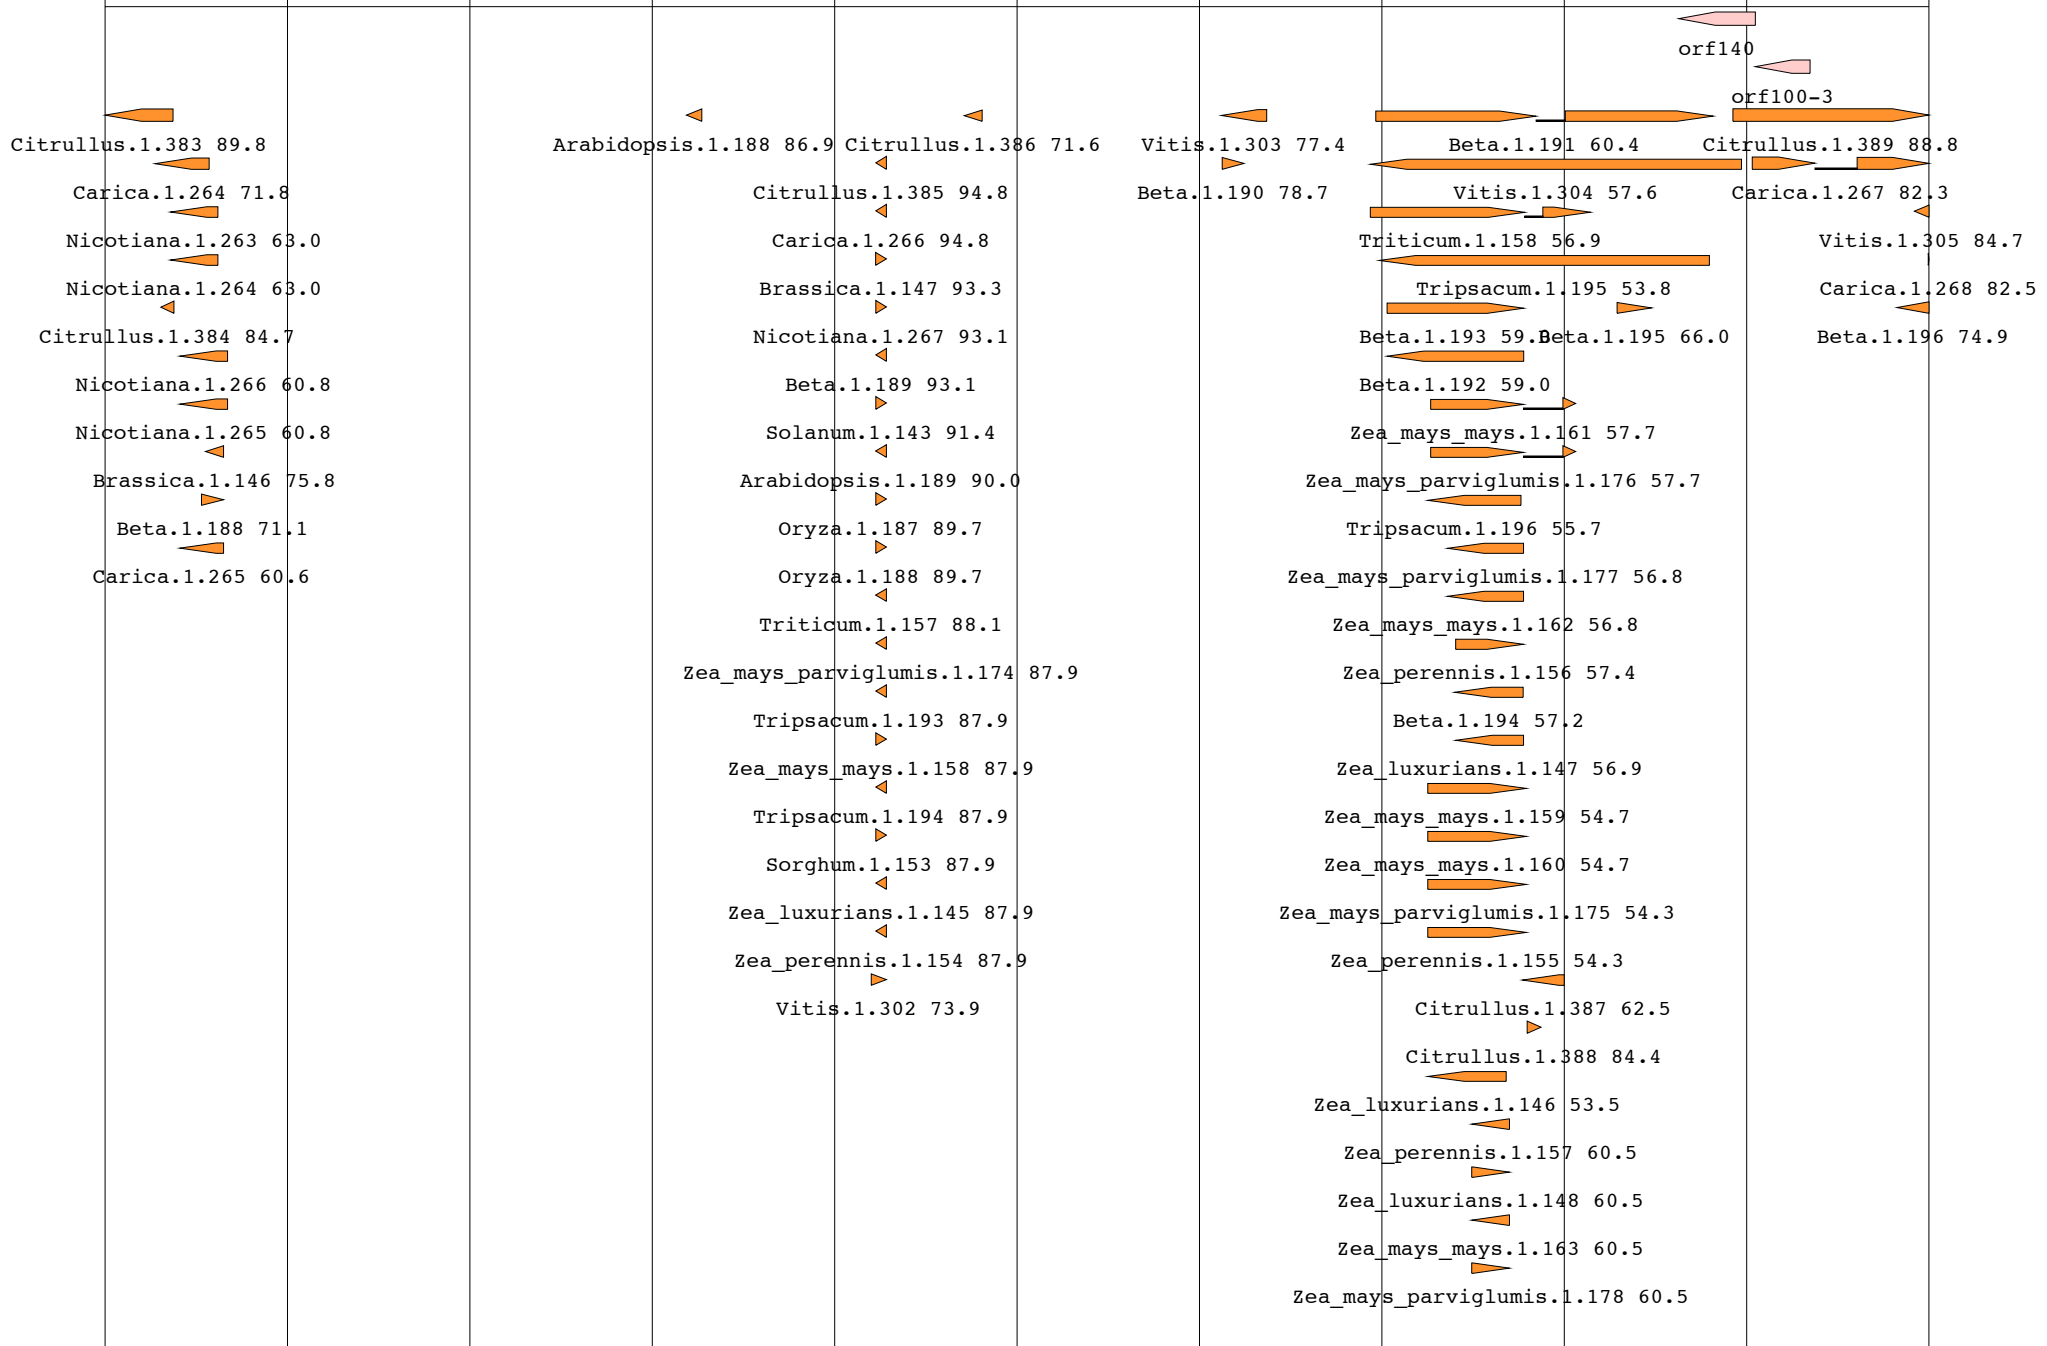

sequence: Cucurbita length: 982833

980001 981000 981917 982833

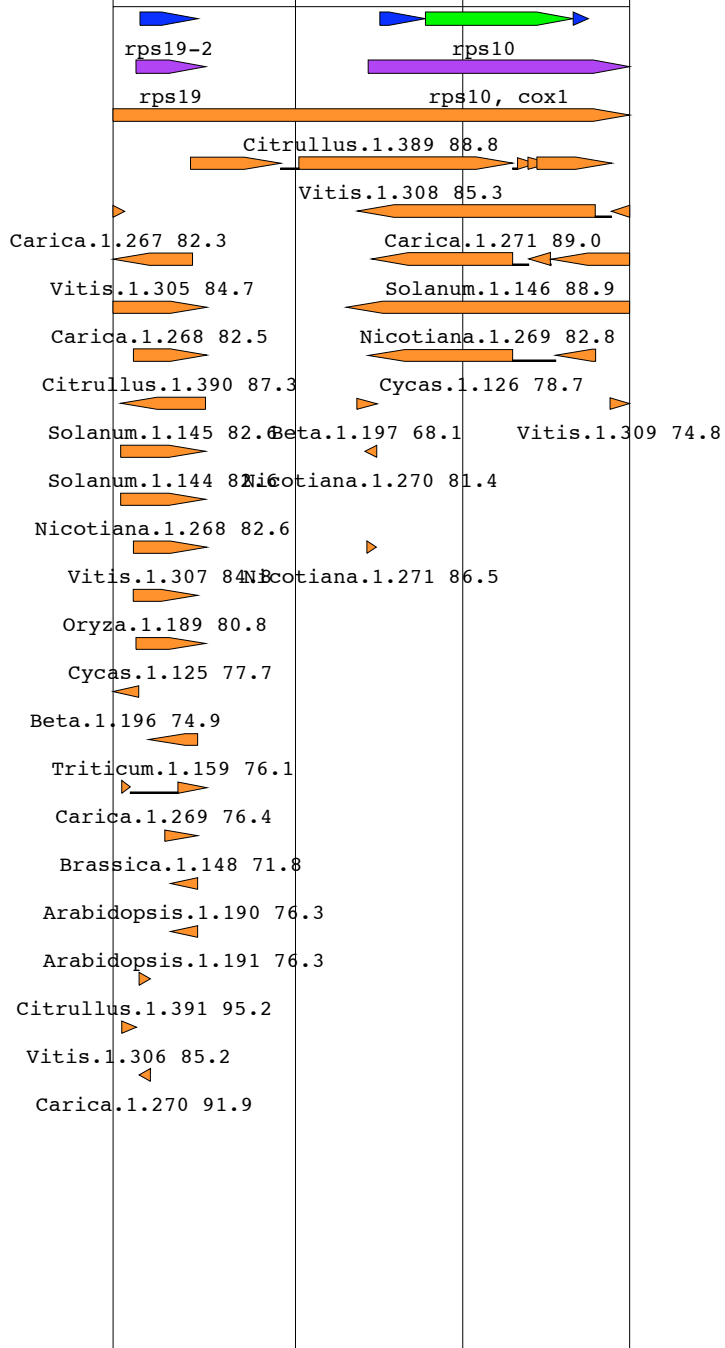

Supplement: msq029_2.pdf [file msq029_2.pdf]
