# Supplementary material
Source: PubMed Central journal article supplement (PMC2877997)
Supplement: msq029_3.pdf [file msq029_3.pdf]

Supplementary Table 1a. Primer sequences for PCR amplification of *Citrullus* mitochondrial cDNA sequences.

| Name        | Forward                  | Name        | Reverse                  |
|-------------|--------------------------|-------------|--------------------------|
| atp1-F      | CTCCCTTGACTCGAGACCATT    | atp1-R1     | CTTGCATCATCCAGTTTGATTTG  |
| atp4-F      | TGGGCGAGCGCATCCGATTC     | atp4-R      | TTCGCTCTTCTGTTAGCATG     |
| atp6-F      | CGGAACKACAGGGATGAAAT     | atp6-R      | CCTCGCTTTTGTTC AATTAT    |
| atp8-F      | GAGTCTCTTTCTGTCTGG       | atp8-R      | GAACGACCAAGTCATAATGAG    |
| atp9a-wat-F | GAAGAGGATTCCCGGACTGG     | atp9a-wat-R | GATAGTTGGTTGAATGAAACG    |
| atp9b-wat-F | AGCGTGAGAATATTATCAACC    | atp9b-wat-R | GTCTTGCTTTATGAGACTG      |
| ccmB-F      | GAAAGAACGAAGAAGTAAGG     | ccmB-3R     | AGCCATTCAATCTTG TAAACT   |
| ccmC-F      | TTCTTGTTCCACTAGCTAGGAC   | ccmC-R1     | AGTGA ACTARGTTTTGGTATTCC |
| ccmFc-F     | AACTCGAACATCTCGAGC       | ccmFc-2     | TCGCACGACAGAAGAACACC     |
| ccmFc-eF    | AGAAATCGGGCTTGAAGCTCT    | ccmFc-R1    | AATTATGAACTCCACGGA ACT   |
| ccmFn-F1    | GATGGGAATAASAAAGCAGAAAT  | ccb382-2    | TGTTGATTCTGAACTTYGTTY    |
| ccb382-4    | TCGGA ACTCGCTGATAGGAAAG  | ccmFn-R1    | CTGGCTCTGAATAAC CWGC     |
| cob-F       | AGAGTTGTCACGATAGGAAAG    | cob-R       | ACTCTACAATGATTTGTGTCAGAA |
| cox1-F      | CTCTGATAAGGAAGGAAACG     | cox1-eR     | GCATAAACCATGCCTAGATAC    |
| cox1-5      | CTCATTCTGCCTGGATYCGGT    | cox1-R1     | GTTAGGTTCTTAGTAGCAGTC    |
| cox2-3F     | GCAGTCAAAGAAKAAASCAAAS   | cox2-3Ra    | CTTTCATTTCYRCTTAAGCTT    |
| cox3-F      | GTCAGATAGAAAGAAAATGAG    | cox3-R      | CCCGGTTCTCTTTGTCTTC      |
| matR-1      | GGGTYGAAGTTTAGACCGCTC    | matR-8      | CTCATCCCGTTCGTCAGYWST    |
| matR-6      | ACGGGTAAAGCACCGTATCCA    | matR-4      | CTTCCCAAGCTCTATGCTGTT    |
| mttB-wat-F  | ATGAATCGAATCCTATCAAATC   | mttB-wat-R  | ATAGT GACTTTGCCAGGTTT    |
| nad1-F      | GACTCAACCACAAATCTGTTG    | nad1-16     | GGRAGCCATBGAAAGGTGACT    |
| nad2-F      | TGAAAGCAGAATTCGTTCCGATCC | nad2-e4R    | CAATTGAACTATGAGCTAGAGGTC |
| nad2-e3F    | TTTGACCGGATACGAAATCACTG  | nad2-R1     | GAACCTTGCAATGATCGAACTT   |
| nad3-F      | GCGATCAAGGAGCGAAAGAAC    | nad3-R      | CTCTTTTTGCCCTCTCACTAGT   |
| nad4-F      | GTTTACTGTTGTCAACTAATCTC  | nad4-e3R    | ATAAAGCTGCTAGTACCAGGT    |
| nad4-3      | AGACAGATCGATCTWAAGAA     | nad4-10     | CCATGTTGCACTAAGTTACTT    |
| nad4L-F     | TTCTCTGACATTCTACGTTCC    | nad4L-R     | ATTTGGGTAATTCTCTAGGAG    |

| Name         | Forward                  | Name       | Reverse                 |
|--------------|--------------------------|------------|-------------------------|
| nad5-F       | TCTGATTTTTTGTGTCTGATCAC  | nad5-e2R   | ACCAAGTATGCGATCCTATCT   |
| nad5-e2F     | AGCTATGCCTGTCAATCGAG     | nad5-18    | TCTAYCCAAGAAGATAGRRAG   |
| nad6-F       | GTTCCATTTTCAGGGAAGGACG   | nad6-R     | CTCACGACTTGGATTCGAACC   |
| nad7-F       | TCTTTCTTMTTCTKCCTTTC     | nad7-e4R   | CATTTGATTAGGACATTGCAC   |
| nad7-e3F     | GATGCATGCCAGTTTCATACG    | nad7-R     | TCGAGCAACTAGTAGTCC      |
| nad9-F       | CKACAAKMAAGCTTTCTTTATC   | nad9-R     | TGGACCTATTCTTCTTCTTAATT |
| rpl2-F       | GAATCGAATGATTAYGATCTCGAC | rpl2-R     | CGCTGTGTGAATAAGGTCTT    |
| rpl5-F       | GCTCATTCTATAGATACTGTG    | rpl5-R     | GCAATCTACGTTTGTGATCTC   |
| rpl16-F      | AATAGCTAGAACTGAATGCGG    | rpl16-R    | GTTTATCCCCACTAACCAA     |
| rps1-F       | AGTTTTACGCTTAAGGGAAG     | rps1-wat-R | CAGCGGATTTTCGCTCATC     |
| rps3-F       | GRAAAAMAARGGGGAGAAAGTC   | rps3-eR    | AGCACCGAAGAAWGGAAAGAG   |
| rps3-eF      | CTCAATCATTTTCGTGGCACC    | rps3-R     | CCTACTACATCTGCCTTTACG   |
| rps4-F       | ATTCCCGTTATACGCGATGTG    | rps4-R     | TCGAGACGGATAGATATGTCC   |
| rps7-F       | CTTCCAATTGCTCGGAAATTC    | rps7-R     | GGAAGAGCTCTTTATGTGGTC   |
| rps10-F      | AGCCAAAAAGAAAGACCACC     | rps10-R    | CCTTTTCCTCTCACCCCG      |
| rps12-F      | GGGAAGGACAAAGGAAAGAG     | rps12-R    | GAAAAASAAGTGAAAGAGGCATC |
| rps13-F      | AGCCNAGAAGACAGTAAAAGG    | rps13-R    | TCCGACAAGTACCAAGGGCTT   |
| rps14-F      | AAAGATGAGGGGGAAACTCAG    | rps14-R    | ACTCCGTTAGGTCTTTTCGKTC  |
| rps19a-F     | TCGAAGCGAAGAAATTCTGAG    | rps19-R    | TTTTCGTGCCATATGCGC      |
| rps19b-wat-F | GGGGAAAAGGAGAAATGAG      | rps19-R    | TTTTCGTGCCATATGCGC      |
| sdh3-wat-F   | ATGAGAATGAGAATGAGAATG    | sdh3-wat-R | AAAAAGTCTTGAATCCTCCAA   |

Supplementary Table 1b. Primer sequences for PCR amplification of *Cucurbita* mitochondrial cDNA sequences.

| Name         | Forward primers          | Name      | Reverse primers          |
|--------------|--------------------------|-----------|--------------------------|
| atp1-F       | CTCCCTTGACTCGAGACCATT    | atp1-R1   | CTTGCATCATCCAGTTTGATTTG  |
| atp4-F       | TGGGCGAGCGCATCCGATTC     | atp4-R    | TTCGCTCTTCTGTTAGCATG     |
| atp6-F       | CGGAACKACAGGGATGAAAT     | atp6-R    | CCTCGCTTTTGTTC AATTAT    |
| atp8-F       | GAGTCTCTTTCTGTCTGG       | atp8-R    | GAACGACCAAGTCATAATGAG    |
| atp9-zuc-F   | AGCGTGACGATCATTATTTATTC  | atp9-R    | GCACTGTGAACTATCTGCTTC    |
| ccmB-F       | GAAAGAACGAAGAAGTAAGG     | ccmB-3R   | AGCCATTCAATCTTG TAACT    |
| ccmC-F       | TTCTTGTTCCACTAGCTAGGAC   | ccmC-R1   | AGTGAACTARGTTTTGGTATTCC  |
| ccmFc-musk-F | AACTCGAACRKM TNGAGC      | ccmFc-eR  | AGAAGAACACCCAASATAAAG    |
| ccmFc-eF     | AGAAATCGGGCTTGAAGCTCT    | ccmFc-R1  | AATTATGAACTCCACGGA ACT   |
| ccmFn-F1     | GATGGGAATAASAAAGCAGAAAT  | ccb382-2* | TGTTGATTCTGAACTTYGTTY    |
| ccb382-4*    | TCGGAACTCGCTGATAGGAAAG   | ccmFn-R1  | CTGGCTCTGAATAAC CWGC     |
| cob-F        | AGAGTTGTCACGATAGGAAAG    | cob-R     | ACTCTACAATGATTTGTGTCAGAA |
| cox1-F       | CTCTGATAAGGAAGGAAACG     | cox1-eR   | GCATAAACCATGCCTAGATAC    |
| cox1-5*      | CTCATTCTGCCTGGATYCGGT    | cox1-R1   | GTTAGGTTCTTAGTAGCAGTC    |
| cox2-3F      | GCAGTCAAAGAAKAAASCAAAS   | cox2-3Ra  | CTTTCATTTCYRCTTAAGCTT    |
| cox3-F       | GTCAGATAGAAAGAAAATGAG    | cox3-R    | CCCGGTTCTCTTTGTCTTC      |
| matR-1*      | GGGTYGAAGTTTAGACCGCTC    | matR-8*   | CTCATCCCGTTCGTCAGYWST    |
| matR-6*      | ACGGGTAAAGCACCGTATCCA    | matR-4*   | CTTCCCAAGCTCTATGCTGTT    |
| mttB-zuc-F   | CCTTCCTTCGATGTAATGAAT    | mttB-R    | ATTGATAGTGACTTTGCCAG     |
| nad1-F       | TCGGGTGACCAGGCCAGATC     | nad1-16*  | GGRAGCCATBGAAAGGTGACT    |
| nad2-F       | TGAAAGCAGAATTCGTTCCGATCC | nad2-e4R  | CAATTGAACTATGAGCTAGAGGTC |
| nad2-e3F     | TTTGACCGGATACGAAATCACTG  | nad2-R1   | GAACCTTGTC AATGATCGAACTT |
| nad3-F       | GCGATCAAGGAGCGAAAGAAC    | nad3-R    | CTCTTTTTGCCCTCTCACTAGT   |
| nad4-F       | GTTTACTGTTGTCAACTAATCTC  | nad4-e3R  | ATAAAGCTGCTAGTACCAGGT    |
| nad4-e2F     | ATCTTTCTATGGATTGCTTCTTTC | nad4-10*  | CCATGTTGCACTAAGTTACTT    |
| nad4L-F      | TTCTCTGACATTCTACGTTCC    | nad4L-R   | ATTTGGGTAATTCTCTAGGAG    |
| nad5-F       | TCTGATTTTTTGTGTCTGATCAC  | nad5-e2R  | ACCAAGTATGCGATCCTATCT    |

| Name       | Forward primers          | Name        | Reverse primers         |
|------------|--------------------------|-------------|-------------------------|
| nad5-e2F   | AGCTATGCCTGTCAATCGAG     | nad5-e5R    | AAACKACTCACTAWCAAAAATG  |
| nad6-F     | GTTCCATTTTCAGGGAAGGACG   | nad6-R      | CTCACGACTTGGATTCTGAACC  |
| nad7-F     | TCTTTCTTMTTCTKCCTTTC     | nad7-e4R    | CATTTGATTAGGACATTGCAC   |
| nad7-e3F   | GATGCATGCCAGTTTCATACG    | nad7-R      | TCGAGCAACTAGTAGTCC      |
| nad9-F     | CKACAAKMAAGCTTTCTTTATC   | nad9-musk-R | GACTGGACCTATTCTGATTCTG  |
| rpl2-F     | GAATCGAATGATTAYGATCTCGAC | rpl2-R      | CGCTGTGTGAATAAGGTCTT    |
| rpl5-F     | GCTCATTCTATAGATACTGTG    | rpl5-R      | GCAATCTACGTTTGTGATCTC   |
| rpl16-F    | AATAGCTAGAACTGAATGCGG    | rpl16-R     | GTTTATCCCCACTAACCAAT    |
| rps1-F     | AGTTTTACGCTTAAGGGAAG     | rps1-zuc-R  | AGCTCAGCAGCTCGACCG      |
| rps3-F     | GRAAAAMAARGGGGAGAAAGTC   | rps3-eR     | AGCACCGAAGAAWGGAAAGAG   |
| rps3-eF    | CTCAATCATTTCTGTGGCACC    | rps3-R      | CCTACTACATCTGCCTTTACG   |
| rps4-F     | ATTCCCGTTATACGCGATGTG    | rps4-R      | TCGAGACGGATAGATATGTCC   |
| rps7-F     | CTTCCAATTGCTCGGAAATTC    | rps7-R      | GGAAGAGCTCTTTATGTGGTC   |
| rps10-F    | AGCCAAAAGAAAGACCACC      | rps10-R     | CCTTTTCTCTCACCCCG       |
| rps12-F    | GGGAAGGACAAAGGAAAGAG     | rps12-R     | GAAAAASAAGTGAAAGAGGCATC |
| rps13-F    | AGCCNAGAAGACAGTAAAAGG    | rps13-R     | TCCGACAAGTACCAAGGGCTT   |
| rps14-F    | AAAGATGAGGGGGAAACTCAG    | rps14-R     | ACTCCGTTAGGTCTTTTCGKTC  |
| rps19a-F   | TCGAAGCGAAGAAATTCTGAG    | rps19-R     | TTTTCGTGCCATATGCGC      |
| sdh3-zuc-F | AGAGAACATAAATCGAACCT     | Sdh3-zuc-R  | CATCATCAATTTGTCTTTCTC   |
