# Supplementary material
Source: PubMed Central journal article supplement (PMC2877997)
Supplement: msq029_4.pdf [file msq029_4.pdf]

Supplemental Table 2a. Transfer RNAs in the mitochondrial genome of *Citrullus lanatus*.

| Gene    | AA  | Anticodon          | Origin          | Start  | End    |
|---------|-----|--------------------|-----------------|--------|--------|
| trnC    | Cys | ACA                | cp <sup>5</sup> | 153988 | 154060 |
| trnC    | Cys | GCA                | mt <sup>1</sup> | 78204  | 78274  |
| trnC    | Cys | GCA                | mt <sup>1</sup> | 121267 | 121339 |
| trnD    | Asp | GTC                | cp <sup>5</sup> | 170502 | 170575 |
| trnE    | Glu | TTC                | mt <sup>1</sup> | 130201 | 130272 |
| trnF    | Phe | GAA                | cp <sup>5</sup> | 140379 | 140451 |
| trnF    | Phe | GAA                | mt <sup>1</sup> | 287216 | 287289 |
| ψ trnfM | Met | - - - <sup>4</sup> | cp <sup>6</sup> | 56341  | 56414  |
| trnfM   | Met | CAT                | mt <sup>1</sup> | 151918 | 151991 |
| trnG    | Gly | GCC                | mt <sup>1</sup> | 45547  | 45618  |
| trnG    | Gly | GCC                | mt <sup>1</sup> | 238845 | 238916 |
| trnH    | His | GTG                | cp <sup>2</sup> | 131226 | 131299 |
| trnH    | His | GTG                | cp <sup>5</sup> | 322701 | 322774 |
| trnI    | Ile | CAT <sup>3</sup>   | mt <sup>1</sup> | 155601 | 155681 |
| trnK    | Lys | TTT                | mt <sup>1</sup> | 227590 | 227662 |
| trnM    | Met | CAT                | cp <sup>2</sup> | 50761  | 50833  |
| trnM    | Met | CAT                | cp <sup>5</sup> | 5346   | 5418   |
| trnN    | Asn | GTT                | cp <sup>2</sup> | 76361  | 76432  |
| trnP    | Pro | TGG                | cp <sup>5</sup> | 224476 | 224550 |
| trnP    | Pro | TGG                | mt <sup>1</sup> | 286845 | 286919 |
| trnQ    | Gln | TTG                | mt <sup>1</sup> | 44457  | 44528  |
| trnQ    | Gln | TTG                | mt <sup>1</sup> | 239935 | 240006 |
| trnS    | Ser | GCT                | mt <sup>1</sup> | 287653 | 287740 |
| trnS    | Ser | TGA                | mt <sup>1</sup> | 358591 | 358677 |
| ψ trnV  | Val | - - - <sup>4</sup> | cp <sup>6</sup> | 359637 | 359678 |
| trnW    | Trp | CCA                | cp <sup>5</sup> | 224257 | 224330 |
| trnY    | Tyr | GTA                | mt <sup>1</sup> | 75277  | 75359  |

<sup>1</sup>native mitochondrial tRNA

<sup>2</sup>intact chloroplast-like tRNA not embedded within larger region of chloroplast DNA

<sup>3</sup>C assumed to be post-transcriptionally modified to lysidine, which pairs with A, not G

<sup>4</sup>anticodon ambiguous or undetermined

<sup>5</sup>intact tRNA embedded within larger region of chloroplast DNA, possibly functional

<sup>6</sup>degenerate tRNA embedded within larger region of chloroplast DNA

Supplemental Table 2b. Transfer RNAs in the mitochondrial genome of *Cucurbita pepo*.

| Gene   | AA  | Anticodon        | Origin          | Start  | End    |
|--------|-----|------------------|-----------------|--------|--------|
| trnC   | Cys | GCA              | mt <sup>1</sup> | 960030 | 960100 |
| trnE   | Glu | TTC              | mt <sup>1</sup> | 265505 | 265576 |
| trnF   | Phe | GAA              | mt <sup>1</sup> | 772934 | 773007 |
| trnfM  | Met | CAT              | mt <sup>1</sup> | 29561  | 29634  |
| trnG   | Gly | GCC              | mt <sup>1</sup> | 174750 | 174821 |
| trnH   | His | GTG              | cp <sup>2</sup> | 267364 | 267437 |
| trnI   | Ile | CAT <sup>3</sup> | mt <sup>1</sup> | 873779 | 873859 |
| trnK   | Lys | TTT              | mt <sup>1</sup> | 837609 | 837681 |
| trnM   | Met | CAT              | cp <sup>2</sup> | 169697 | 169769 |
| trnN   | Asn | GTT              | cp <sup>2</sup> | 958219 | 958290 |
| trnP   | Pro | TGG              | mt <sup>1</sup> | 773199 | 773273 |
| trnQ   | Gln | TTG              | mt <sup>1</sup> | 517723 | 517794 |
| trnY   | Tyr | GTA              | mt <sup>1</sup> | 957149 | 957231 |
| trnC   | Cys | GCA              | cp <sup>5</sup> | 307922 | 307993 |
| trnD   | Asp | GTC              | cp <sup>5</sup> | 704568 | 704641 |
| trnD   | Asp | GTC              | cp <sup>5</sup> | 741975 | 742048 |
| trnE   | Glu | TTC              | cp <sup>5</sup> | 304824 | 304896 |
| ψ trnE | Glu | --- <sup>4</sup> | cp <sup>6</sup> | 741510 | 741570 |
| trnF   | Phe | GAA              | cp <sup>5</sup> | 11874  | 11946  |
| ψ trnF | Phe | --- <sup>4</sup> | cp <sup>6</sup> | 729196 | 729269 |
| trnfM  | Met | CAT              | cp <sup>5</sup> | 299903 | 299978 |
| trnI   | Ile | CAT              | cp <sup>5</sup> | 610481 | 610554 |
| ψ trnL | Leu | CAA              | cp <sup>6</sup> | 12063  | 12130  |
| trnL   | Leu | CAA              | cp <sup>5</sup> | 766547 | 766627 |
| trnM   | Met | CAT              | cp <sup>5</sup> | 8036   | 8108   |
| trnP   | Pro | TGG              | cp <sup>5</sup> | 682940 | 683013 |
| ψ trnP | Pro | TGG              | cp <sup>6</sup> | 966947 | 967017 |
| trnQ   | Gln | TTG              | cp <sup>5</sup> | 701050 | 701121 |
| trnS   | Ser | GGA              | cp <sup>5</sup> | 14267  | 14357  |
| trnS   | Ser | TGA              | cp <sup>5</sup> | 22546  | 22640  |
| ψ trnS | Ser | GGA              | cp <sup>6</sup> | 292522 | 292621 |
| ψ trnS | Ser | TGA              | cp <sup>6</sup> | 300640 | 300743 |
| trnS   | Ser | GCT              | cp <sup>5</sup> | 701979 | 702066 |
| ψ trnV | Val | --- <sup>4</sup> | cp <sup>6</sup> | 161629 | 161670 |
| trnW   | Trp | CCA              | cp <sup>5</sup> | 967163 | 967236 |
| ψ trnY | Tyr | GTA              | cp <sup>6</sup> | 304956 | 305034 |
| ψ trnY | Tyr | GTA              | cp <sup>6</sup> | 741640 | 741727 |

<sup>1</sup>native mitochondrial tRNA

<sup>2</sup>intact chloroplast-like tRNA not embedded within larger region of chloroplast DNA

<sup>3</sup>C assumed to be post-transcriptionally modified to lysidine, which pairs with A, not G

<sup>4</sup>anticodon ambiguous or undetermined

<sup>5</sup>intact tRNA embedded within larger region of chloroplast DNA, possibly functional

<sup>6</sup>degenerate tRNA embedded within larger region of chloroplast DNA
