# Supplementary material
Source: PubMed Central journal article supplement (PMC2877997)
Supplement: msq029_5.pdf [file msq029_5.pdf]

Supplementary Table 3. RNA editing data for *Citrullus* (Cit) and *Cucurbita* (Cuc) mitochondrial genes.

| Gene                    | CDS length        |                   | Total edits |                 | Edits/100 nt <sup>b</sup> |                 | Shared edits    | Nonsynonymous edits |                 |         |                 | Synonymous edits |                 |         |                 |
|-------------------------|-------------------|-------------------|-------------|-----------------|---------------------------|-----------------|-----------------|---------------------|-----------------|---------|-----------------|------------------|-----------------|---------|-----------------|
|                         | Cit               | Cuc               | Cit         | Cuc             | Cit                       | Cuc             |                 | Full                |                 | Partial |                 | Full             |                 | Partial |                 |
|                         |                   |                   |             |                 |                           |                 |                 | Cit                 | Cuc             | Cit     | Cuc             | Cit              | Cuc             | Cit     | Cuc             |
| <i>atp1</i>             | 1530 <sup>a</sup> | 1530 <sup>a</sup> | 7           | 3               | 0.53                      | 0.23            | 3               | 5                   | 3               | 0       | 0               | 0                | 0               | 2       | 0               |
| <i>atp4</i>             | 597 <sup>a</sup>  | 576               | 13          | 12              | 2.37                      | 2.08            | 12              | 11                  | 10              | 1       | 1               | 0                | 1               | 1       | 0               |
| <i>atp6</i>             | 774 <sup>a</sup>  | 780 <sup>a</sup>  | 20          | 20              | 2.84                      | 3.00            | 19              | 19                  | 18              | 1       | 2               | 0                | 0               | 0       | 0               |
| <i>atp8</i>             | 480               | 483               | 3           | 3               | 0.62                      | 0.62            | 3               | 2                   | 2               | 1       | 1               | 0                | 0               | 0       | 0               |
| <i>atp9</i>             | 225               | 225               | 7           | 6               | 3.11                      | 2.67            | 6               | 6                   | 6               | 0       | 0               | 0                | 0               | 1       | 0               |
| $\Psi$ <i>atp9</i>      | 171               | NA <sup>c</sup>   | 5           | NA <sup>c</sup> | 2.92                      | NA <sup>c</sup> | NA <sup>c</sup> | 5                   | NA <sup>c</sup> | 0       | NA <sup>c</sup> | 0                | NA <sup>c</sup> | 0       | NA <sup>c</sup> |
| <i>ccmB</i>             | 621 <sup>a</sup>  | 621 <sup>a</sup>  | 34          | 33              | 6.30                      | 5.76            | 30              | 32                  | 30              | 0       | 0               | 2                | 2               | 0       | 1               |
| <i>ccmC</i>             | 699 <sup>a</sup>  | 699 <sup>a</sup>  | 18          | 18              | 3.75                      | 3.33            | 16              | 10                  | 9               | 5       | 7               | 1                | 0               | 2       | 2               |
| <i>ccmFc</i>            | 1317 <sup>a</sup> | 1314 <sup>a</sup> | 11          | 13              | 0.93                      | 1.10            | 11              | 3                   | 12              | 8       | 0               | 0                | 0               | 0       | 1               |
| <i>ccmFn</i>            | 1734 <sup>a</sup> | 1734 <sup>a</sup> | 25          | 31              | 1.95                      | 2.24            | 19              | 18                  | 18              | 6       | 10              | 0                | 0               | 1       | 3               |
| <i>cob</i>              | 1173              | 1173              | 13          | 13              | 1.11                      | 1.11            | 13              | 4                   | 8               | 9       | 5               | 0                | 0               | 0       | 0               |
| <i>cox1</i>             | 1584 <sup>a</sup> | 1584 <sup>a</sup> | 18          | 18              | 1.16                      | 1.22            | 16              | 17                  | 17              | 1       | 1               | 0                | 0               | 0       | 0               |
| <i>cox2</i>             | 783 <sup>a</sup>  | 783 <sup>a</sup>  | 10          | 12              | 1.45                      | 1.71            | 10              | 10                  | 12              | 0       | 0               | 0                | 0               | 0       | 0               |
| <i>cox3</i>             | 798               | 798               | 10          | 7               | 1.25                      | 0.88            | 7               | 9                   | 7               | 0       | 0               | 0                | 0               | 1       | 0               |
| <i>matR</i>             | 2007 <sup>a</sup> | 1935 <sup>a</sup> | 4           | 4               | 0.22                      | 0.30            | 3               | 0                   | 3               | 3       | 0               | 1                | 1               | 0       | 0               |
| <i>mttB</i>             | 849 <sup>a</sup>  | 816 <sup>a</sup>  | 21          | 27              | 3.11                      | 3.70            | 18              | 3                   | 18              | 15      | 5               | 0                | 1               | 3       | 3               |
| <i>nad1</i>             | 978 <sup>a</sup>  | 978 <sup>a</sup>  | 21          | 21              | 2.37                      | 2.21            | 18              | 20                  | 20              | 0       | 0               | 0                | 0               | 1       | 1               |
| <i>nad2</i>             | 1467 <sup>a</sup> | 1467 <sup>a</sup> | 26          | 26              | 1.88                      | 1.87            | 24              | 23                  | 23              | 0       | 0               | 1                | 2               | 2       | 1               |
| <i>nad3</i>             | 357               | 357               | 14          | 10              | 3.92                      | 2.80            | 10              | 9                   | 8               | 4       | 2               | 0                | 0               | 1       | 0               |
| <i>nad4</i>             | 1488 <sup>a</sup> | 1488 <sup>a</sup> | 43          | 33              | 2.99                      | 2.41            | 33              | 38                  | 30              | 0       | 0               | 2                | 2               | 3       | 1               |
| <i>nad4L</i>            | 303               | 303               | 13          | 13              | 4.29                      | 4.29            | 13              | 8                   | 10              | 4       | 2               | 1                | 1               | 0       | 0               |
| <i>nad5</i>             | 2001 <sup>a</sup> | 1995 <sup>a</sup> | 29          | 21              | 1.57                      | 1.12            | 21              | 27                  | 21              | 0       | 0               | 0                | 0               | 2       | 0               |
| <i>nad6<sup>d</sup></i> | 618 <sup>a</sup>  | 618 <sup>a</sup>  | 0           | 0               | 0.00                      | 0.00            | 0               | 0                   | 0               | 0       | 0               | 0                | 0               | 0       | 0               |
| <i>nad7</i>             | 1185 <sup>a</sup> | 1185 <sup>a</sup> | 30          | 29              | 2.69                      | 2.61            | 28              | 27                  | 26              | 0       | 0               | 2                | 3               | 1       | 0               |
| <i>nad9</i>             | 573               | 573 <sup>a</sup>  | 8           | 8               | 1.40                      | 1.42            | 8               | 8                   | 1               | 0       | 7               | 0                | 0               | 0       | 0               |
| <i>rpl2</i>             | 999 <sup>a</sup>  | 999 <sup>a</sup>  | 1           | 1               | 0.11                      | 0.11            | 1               | 1                   | 1               | 0       | 0               | 0                | 0               | 0       | 0               |

Supplementary Table 3. continued

| Gene                      | CDS length        |                                        | Total edits |     | Edits/100 nt <sup>b</sup> |      | Shared edits | Nonsynonymous edits |     |         |     | Synonymous edits |     |         |     |
|---------------------------|-------------------|----------------------------------------|-------------|-----|---------------------------|------|--------------|---------------------|-----|---------|-----|------------------|-----|---------|-----|
|                           | Cit               | Cuc                                    | Cit         | Cuc | Cit                       | Cuc  |              | Full                |     | Partial |     | Full             |     | Partial |     |
|                           |                   |                                        |             |     |                           |      |              | Cit                 | Cuc | Cit     | Cuc | Cit              | Cuc | Cit     | Cuc |
| <i>rpl5</i>               | 558               | 558                                    | 9           | 8   | 1.61                      | 1.43 | 8            | 5                   | 7   | 4       | 1   | 0                | 0   | 0       | 0   |
| <i>rpl16</i>              | 411 <sup>a</sup>  | 435                                    | 3           | 5   | 0.80                      | 1.15 | 3            | 3                   | 4   | 0       | 0   | 0                | 0   | 0       | 1   |
| <i>rps1</i>               | 534               | 504                                    | 1           | 1   | 0.19                      | 0.20 | 1            | 1                   | 1   | 0       | 0   | 0                | 0   | 0       | 0   |
| <i>rps3</i>               | 1692 <sup>a</sup> | 1698 <sup>a</sup>                      | 7           | 10  | 0.44                      | 0.60 | 6            | 5                   | 6   | 1       | 1   | 0                | 0   | 1       | 3   |
| <i>rps4</i>               | 1068 <sup>a</sup> | 1071 <sup>a</sup>                      | 17          | 12  | 1.71                      | 1.43 | 12           | 14                  | 1   | 3       | 11  | 0                | 0   | 0       | 0   |
| <i>rps7</i>               | 447               | 447                                    | 2           | 3   | 0.45                      | 0.67 | 2            | 0                   | 1   | 2       | 1   | 0                | 0   | 0       | 1   |
| <i>rps10</i>              | 333               | 333                                    | 5           | 5   | 1.50                      | 1.50 | 5            | 5                   | 4   | 0       | 1   | 0                | 0   | 0       | 0   |
| <i>rps12</i>              | 372               | 378                                    | 6           | 6   | 1.61                      | 1.59 | 6            | 0                   | 1   | 6       | 5   | 0                | 0   | 0       | 0   |
| <i>rps13</i>              | 351               | 351                                    | 3           | 3   | 0.85                      | 0.85 | 3            | 0                   | 1   | 3       | 2   | 0                | 0   | 0       | 0   |
| $\Psi$ <i>rps14</i>       | 307               | 308                                    | 0           | 0   | 0.00                      | 0.00 | 0            | 0                   | 0   | 0       | 0   | 0                | 0   | 0       | 0   |
| <i>rps19</i> <sup>e</sup> | 279               | 318 <sup>a</sup> ,<br>330 <sup>a</sup> | 3           | 4   | 1.08                      | 1.32 | 3            | 0                   | 1   | 2       | 1   | 0                | 0   | 1       | 2   |
| <i>sdh3</i> <sup>f</sup>  | 285               | 318                                    | 3           | 5   | 1.05                      | 1.57 | 3            | 1                   | 2   | 1       | 1   | 1                | 0   | 0       | 2   |

<sup>a</sup>incomplete cDNA sequence

<sup>b</sup>Observed edits/100 nt of cDNA sequence. A total of 29,488 nt and 28,938 nt of cDNA sequence was analyzed for *Citrullus* and *Cucurbita*, respectively.

<sup>c</sup>Not applicable (NA) because *Cucurbita* lacks  $\Psi$ *atp9*.

<sup>d</sup>Despite having 10 predicted editing sites, no evidence of editing was found in the *nad6* gene of either species. Although no sign of DNA contamination was found in negative control PCRs, it remains possible that *nad6* is nonetheless edited in both species.

<sup>e</sup>Both species have two copies of the *rps19* gene that are identical in length in *Citrullus* but not in *Cucurbita*. Editing data was gathered for the *rps19-1* gene in *Citrullus*. For *Cucurbita*, it could not be determined whether the cDNA sequenced derived from one or both of the *rps19* genes, which are identical along the length of the cDNA sequence.

<sup>f</sup>*Citrullus* has two identical copies of the *sdh3* gene, so it could not be determined whether the cDNA sequenced derived from one or both of the *sdh3* genes.
